# Supplementary material for: Exploring the Scope of Tandem Palladium and Isothiourea Relay Catalysis for the Synthesis of α-Amino Acid Derivatives
Source: MDPI journal article supplement (doi:10.3390/molecules25102463), 2020-05-25
Supplement: s1 [file s1]

# Exploring the Scope of Tandem Palladium and Isothiourea Relay Catalysis for the Synthesis of $\alpha$ -Amino Acid Derivatives

Jacqueline Bitai, Alexandra M. Z. Slawin, David B. Cordes and Andrew D. Smith\*

## Supporting Information

|                                                                                                                                 |     |
|---------------------------------------------------------------------------------------------------------------------------------|-----|
| 1. General Information.....                                                                                                     | 2   |
| 1. General Procedures.....                                                                                                      | 5   |
| 2. Preparation of Allylic Phosphate Starting Materials .....                                                                    | 8   |
| 3. Tandem Pd/ITU Relay Catalysis Products .....                                                                                 | 26  |
| 4. Identified Side Products .....                                                                                               | 43  |
| 5. Determination of Product Configuration .....                                                                                 | 45  |
| 6. References.....                                                                                                              | 49  |
| Appendix I. Proposed Mechanisms for the Formation of Side Products.....                                                         | 52  |
| Appendix II. $^1\text{H}$ , $^{13}\text{C}\{^1\text{H}\}$ and $^{31}\text{P}\{^1\text{H}\}$ NMR Spectra of Novel Compounds..... | 54  |
| Appendix III. HPLC traces.....                                                                                                  | 132 |

## 1. General Information

All reagents and solvents were obtained from commercial suppliers and were used without further purification unless otherwise stated. Purification was carried out according to standard laboratory methods. Tetramisole·HCl **12** was obtained from Sigma-Aldrich, benztetramisole (BTM) **5** was synthesised in house.<sup>1</sup> *N,N*-Dimethylglycine, 4-nitrophenyl ester hydrochloride **13**, 2-(piperidin-1-yl)acetic acid, 4-nitrophenyl ester hydrochloride **30** and *N*-allyl-*N*-methylglycine, 4-nitrophenol ester hydrochloride **31** were prepared according to literature procedures.<sup>2</sup> Palladium precatalyst FurCat **3** was prepared according to the literature.<sup>3</sup> Pd<sub>2</sub>dba<sub>3</sub>·CHCl<sub>3</sub> was purchased from Strem Chemicals Inc. and recrystallized from CHCl<sub>3</sub>/Acetone following the procedure of Ananikov and co-workers.<sup>4</sup> Racemic products were obtained using (±)-TM·HCl catalyst. Sodium benzylate (NaOBn, 1 M in THF) was prepared by treating BnOH with NaH in anhydrous THF.

Reactions involving moisture sensitive reagents were carried out in flame-dried glassware under an inert atmosphere (N<sub>2</sub> or Ar) using standard vacuum line techniques. Anhydrous solvents (Et<sub>2</sub>O, CH<sub>2</sub>Cl<sub>2</sub>, THF and toluene) were obtained after passing through an alumina column (Mbraun SPS-800). Petrol is defined as petroleum ether 40–60 °C.

Room temperature (rt) refers to 20–25 °C. Temperatures of 0 °C and –78 °C were obtained using ice/water and CO<sub>2</sub>(s)/acetone baths, respectively. Reactions involving heating were performed using DrySyn blocks and a contact thermocouple.

Under reduced pressure refers to the use of either a Büchi Rotavapor R-200 with a Büchi V-491 heating bath and Büchi V-800 vacuum controller, a Büchi Rotavapor R-210 with a Büchi V-491 heating bath and Büchi V-850 vacuum controller, a Heidolph Laborota 4001 with vacuum controller, an IKA RV10 rotary evaporator with an IKA HB10 heating bath and ILMVAC vacuum controller, or an IKA RV10 rotary evaporator with an IKA HB10 heating bath and Vacuubrand CVC3000 vacuum controller. Rotary evaporator condensers are fitted to Julabo FL601 Recirculating Coolers filled with ethylene glycol and set to –5 °C.

Analytical thin layer chromatography was performed on pre-coated aluminium plates (Kieselgel 60 F254 silica) and visualisation was achieved using ultraviolet light (254 nm)

and/or staining with either aqueous  $\text{KMnO}_4$  solution, ethanolic phosphomolybdic acid, or ethanolic Vanillin solution followed by heating. Manual column chromatography was performed in glass columns fitted with porosity 3 sintered discs over Kieselgel 60 silica using the solvent system stated. Automated chromatography was performed on a Biotage Isolera Four running Biotage OS578 with a UV/Vis detector using the method stated and cartridges filled with Kieselgel 60 silica.

Melting points were recorded on an Electrothermal 9100 melting point apparatus, (dec) refers to decomposition.

Optical rotations  $[\alpha]_D^{20}$  were measured on a Perkin Elmer Precisely/Model-341 polarimeter operating at the sodium D line with a 100 mm path cell at 20 °C.

HPLC analyses were obtained on either a Shimadzu HPLC consisting of a DGU-20A5 degassing unit, LC-20AT liquid chromatography pump, SIL-20AHT autosampler, CMB-20A communications bus module, SPD-M20A diode array detector and a CTO-20A column oven or a Shimadzu HPLC consisting of a DGU-20A5R degassing unit, LC-20AD liquid chromatography pump, SIL-20AHT autosampler, SPD-20A UV/Vis detector and a CTO-20A column oven. Separation was achieved using either DAICEL CHIRALCEL OD-H column or DAICEL CHIRALPAK AD-H, and ID columns using the method stated. HPLC traces of enantiomerically enriched compounds were compared with authentic racemic spectra.

Infrared spectra were recorded on a Shimadzu IRAffinity-1 Fourier transform IR spectrophotometer fitted with a Specac Quest ATR accessory (diamond puck). Spectra were recorded of either thin films or solids, with characteristic absorption wavenumbers ( $\nu_{\text{max}}$ ) reported in  $\text{cm}^{-1}$ .

$^1\text{H}$ ,  $^{13}\text{C}\{^1\text{H}\}$ , and  $^{31}\text{P}\{^1\text{H}\}$  NMR spectra were acquired on either a Bruker AV300 with a BBFO probe ( $^1\text{H}$  300 MHz), a Bruker AV400 with a BBFO probe ( $^1\text{H}$  400 MHz;  $^{13}\text{C}\{^1\text{H}\}$  101 MHz;  $^{31}\text{P}\{^1\text{H}\}$  162 MHz), a Bruker AVII 400 with a BBFO probe ( $^1\text{H}$  400 MHz;  $^{13}\text{C}\{^1\text{H}\}$  101 MHz;  $^{31}\text{P}\{^1\text{H}\}$  162 MHz), a Bruker AVIII-HD 500 with a SmartProbe BBFO+ probe ( $^1\text{H}$  500 MHz,  $^{13}\text{C}\{^1\text{H}\}$  126 MHz), a Bruker AVIII 500 with a CryoProbe Prodigy BBO probe ( $^1\text{H}$  500 MHz,  $^{13}\text{C}\{^1\text{H}\}$  126 MHz) in the deuterated solvent stated. All chemical shifts are quoted in parts per

million (ppm) relative to the residual solvent peak. All coupling constants,  $J$ , are quoted in Hz. Multiplicities are indicated as s (singlet), br s (broad singlet), d (doublet), t (triplet), q (quartet), m (multiplet), and multiplets thereof. The abbreviation Ar denotes aromatic. NMR peak assignments were confirmed using 2D  $^1\text{H}$  correlated spectroscopy (COSY), 2D  $^1\text{H}$ - $^{13}\text{C}$  heteronuclear multiple-bond correlation spectroscopy (HMBC), and 2D  $^1\text{H}$ - $^{13}\text{C}$  heteronuclear single quantum coherence (HSQC) where necessary.

Mass spectrometry ( $m/z$ ) data were acquired by either electrospray ionisation (ESI) or nanospray ionisation (NSI) at either the University of St Andrews Mass Spectrometry Facility or at the EPSRC UK National Mass Spectrometry Facility at Swansea University.

## 1. General Procedures

### 1.1 General Procedure for the Synthesis of Allylic Phosphates

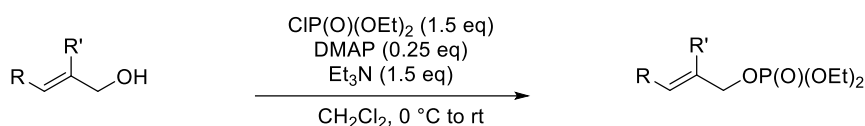

Following the procedure of Smith and co-workers<sup>2</sup>, allylic alcohol (1.0 eq) was added to a flame dried round bottom flask and dissolved in anhydrous  $\text{CH}_2\text{Cl}_2$  (0.1 M) under argon atmosphere.  $\text{Et}_3\text{N}$  (1.5 eq) and DMAP (0.25 eq) were added, the mixture was cooled to 0 °C and diethyl chlorophosphate (1.5 eq) was added dropwise. Stirring was continued at rt until TLC analysis indicated complete conversion. The reaction mixture was quenched with sat. aq.  $\text{NaHCO}_3$  (equal volume), the phases were separated, and the aqueous phase was extracted with  $\text{CH}_2\text{Cl}_2$  (3 × equal volume). The combined organic phases were dried over  $\text{MgSO}_4$ , filtered and the solvent was removed under reduced pressure. The crude residue was purified by flash silica chromatography as specified.

### General Scheme for the Synthesis of Amide containing Allylic Alcohols

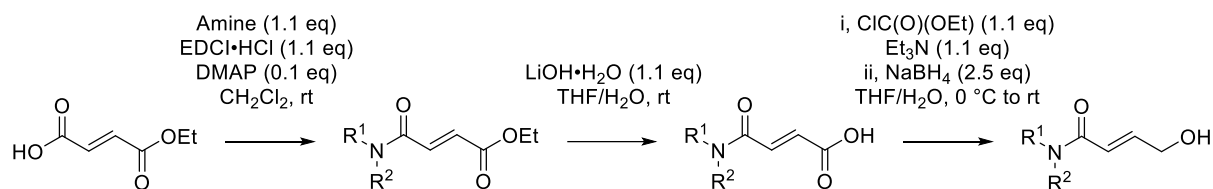

### 1.2 General Procedure for Amide Coupling

Adapting the procedure of Snaddon and co-workers,<sup>5</sup> monoethyl fumarate (1.0 eq) and amine (1.1 eq) were dissolved in  $\text{CH}_2\text{Cl}_2$  (0.4 M), followed by the addition of  $\text{EDCI}\cdot\text{HCl}$  (1.1 eq) and DMAP (0.1 eq) at 0 °C. The reaction mixture was allowed to warm to room temperature overnight and subsequently washed with 1 M  $\text{HCl}$  (2 × equal volume) and brine (2 × equal volume). The organic phase was dried over  $\text{MgSO}_4$ , filtered and the solvent removed under reduced pressure to yield the corresponding amide ester, which was used without further purification.

### 1.3 General Procedure for Ester Hydrolysis with LiOH

Adapting the procedure of Smith and co-workers,<sup>6</sup> LiOH·H<sub>2</sub>O (1.1 eq) was added in portions to a stirred solution of ethyl ester (1.0 eq) in H<sub>2</sub>O : THF 1:1 (1.0 M). The reaction was stirred overnight at room temperature followed by acidification with 2 M HCl to pH 2 and extraction with CH<sub>2</sub>Cl<sub>2</sub> (3 ×). The combined organic phases were dried over MgSO<sub>4</sub> and the solvent removed under reduced pressure to yield the corresponding acid.

### 1.4 General Procedure for the Reduction of unsaturated Acids

Adapting the procedure of Jacobi and co-workers,<sup>7</sup> to a stirred solution of unsaturated acid (1.0 eq) and Et<sub>3</sub>N (1.1 eq) in anhydrous THF (0.4 M) under inert atmosphere at 0 °C was added dropwise ethyl chloroformate (1.1 eq). The resulting suspension was stirred at 0 °C for 1 h, filtered and the solid washed twice with anhydrous THF. The combined filtrates were added dropwise to a vigorously stirred solution of NaBH<sub>4</sub> (2.5 eq) in H<sub>2</sub>O (0.7 M) at 0 °C. The reaction mixture was allowed to warm to room temperature and stirred until TLC indicated complete conversion. The mixture was adjusted to pH 5 with 1 M HCl, extracted with EtOAc (4 ×) and the combined organic phases dried over MgSO<sub>4</sub>, filtered and the solvent removed under reduced pressure. The crude product was purified by silica column chromatography as specified.

### 1.5 General Procedure for Tandem Pd/ITU Relay Catalysis

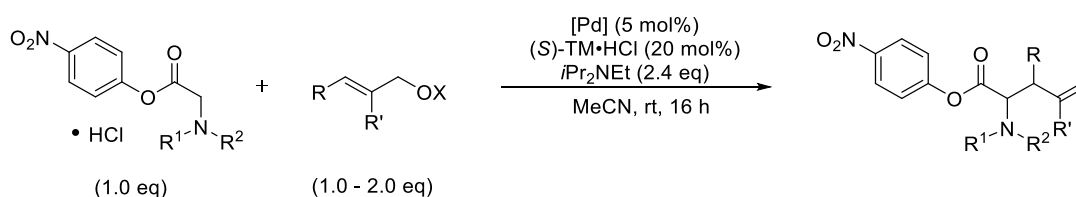

A Schlenk tube was charged with PdFurCat (5 mol%) or Pd<sub>2</sub>(dba)<sub>3</sub>·CHCl<sub>3</sub> (2.5 mol%) and P(2-furyl)<sub>3</sub> (10 mol%), (S)-TM·HCl (10 mol%) and PNP Ester (1.0 eq). The tube was then evacuated and flushed with argon three times, degassed MeCN (0.06 M) was added and the mixture stirred for 10 min at room temperature. Subsequently phosphate or mesylate (1.0 – 2.0 eq) and *i*Pr<sub>2</sub>NEt (2.4 eq) were added in this order and the reaction mixture stirred at room temperature for 16 h. An aliquot was taken, the solvent removed under reduced pressure and <sup>1</sup>H NMR spectroscopy of the crude mixture used to determine the dr. The reaction

mixture was then filtered over a short plug of silica with MeCN and the filtrate concentrated under reduced pressure. The residue was purified by flash silica chromatography as specified or directly derivatised with NaOBn.

Derivatisation with NaOBn:

The crude reaction mixture was dissolved in anhydrous THF (6.0 mL), freshly prepared NaOBn (1 M in anhydrous THF, 0.45 mL, 0.45 mmol, 1.5 eq) added dropwise at room temperature and the reaction monitored by TLC. After complete conversion (ca. 3h) the reaction was quenched with sat. NaHCO<sub>3</sub> solution (equal volume) and diluted with EtOAc. The phases were separated, the aqueous phase extracted with EtOAc (3 × equal volume) and the combined organic phases washed with sat. NaHCO<sub>3</sub> (2 × equal volume) and brine (equal volume). The organic phase was dried over MgSO<sub>4</sub>, filtered and the solvent removed under reduced pressure to afford the crude product, which was purified by silica column chromatography as specified.

## 2. Preparation of Allylic Phosphate Starting Materials

### 2.1 (E)-4-Hydroxy-2-butenic acid, ethyl ester (SI-1)

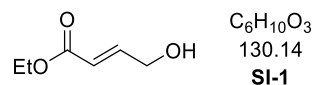

Following the procedure of Smith and co-workers,<sup>8</sup> borane (1.0 M in THF, 14 mL, 14 mmol, 1.0 eq) was added dropwise to a stirred solution of monoethyl fumarate (2.02 g, 14 mmol, 1.0 eq) in anhydrous THF (10 mL) at 0 °C. After complete addition, the reaction mixture was allowed to warm to rt and stir for 12 h. The reaction was quenched with 50% aq. AcOH (10 mL) and then THF was removed under reduced pressure. The remaining solution was neutralized with sat. aq.  $\text{NaHCO}_3$  solution and extracted with EtOAc (4 × 30 mL). The combined organic phases were dried over  $\text{MgSO}_4$ , filtered and the solvent removed under reduced pressure. Purification by silica column chromatography (Petrol : EtOAc 4:1 to 1:1,  $R_f$  0.47 in Petrol : EtOAc 1:1) gave the title compound as a pale yellow liquid (905 mg, 49%).

$^1\text{H}$  NMR (400 MHz,  $\text{CDCl}_3$ )  $\delta_{\text{H}}$ : 1.28 (3H, t,  $J$  7.1,  $\text{OCH}_2\text{CH}_3$ ), 4.19 (2H, q,  $J$  7.1,  $\text{OCH}_2\text{CH}_3$ ), 4.34 (2H, dd,  $J$  4.0, 2.1,  $\text{C}(4)\text{H}_2$ ), 6.09 (1H, dt,  $J$  15.7, 2.1,  $\text{C}(2)\text{H}$ ), 7.02 (1H, dt,  $J$  15.7, 4.0,  $\text{C}(3)\text{H}$ ).

Data in accordance with literature.<sup>9</sup>

### 2.2 (E)-4-[(Diethoxyphosphinyl)oxy]-2-butenic acid, ethyl ester (14)

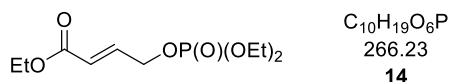

Following General Procedure 1.1 using **SI-1** (195 mg, 1.5 mmol, 1.0 eq), diethyl chlorophosphate (325  $\mu\text{L}$ , 2.25 mmol, 1.5 eq),  $\text{Et}_3\text{N}$  (314  $\mu\text{L}$ , 2.25 mmol, 1.5 eq) and DMAP (46.0 mg, 0.38 mmol, 0.25 eq) in anhydrous  $\text{CH}_2\text{Cl}_2$  (10 mL) gave the title compound following purification by flash silica chromatography ( $n$ -hexane : EtOAc 1:1 to 1:2,  $R_f$  0.19 in  $n$ -hexane : EtOAc 1:1) as a pale yellow oil (283 mg, 71%).

$^1\text{H}$  NMR (400 MHz,  $\text{CDCl}_3$ )  $\delta_{\text{H}}$ : 1.28 (3H, t,  $J$  7.1,  $\text{CH}_2\text{CH}_3$ ), 1.34 (6H, td,  $J$  7.0, 1.0,  $\text{P}(\text{OCH}_2\text{CH}_3)_2$ ), 4.13 (4H, dq,  $J$  8.1, 7.1,  $\text{P}(\text{OCH}_2\text{CH}_3)_2$ ), 4.20 (2H, q,  $J$  7.2,  $\text{CH}_2\text{CH}_3$ ), 4.69 (2H, ddd,  $J$  7.3, 4.2, 2.1,  $\text{C}(4)\text{H}_2$ ), 6.11 (1H, dt,  $J$  15.6, 2.0,  $\text{C}(2)\text{H}$ ), 6.92 (1H, dtd,  $J$  15.7, 4.3, 1.8,  $\text{C}(3)\text{H}$ ).

$^{13}\text{C}$  { $^1\text{H}$ } NMR (126 MHz,  $\text{CDCl}_3$ )  $\delta_{\text{C}}$ : 14.2 ( $\text{CH}_2\text{CH}_3$ ), 16.1 (d,  $^3J_{\text{CP}}$  6.7,  $\text{P}(\text{OCH}_2\text{CH}_3)_2$ ), 60.6 ( $\text{CH}_2\text{CH}_3$ ), 64.1 (d,  $^2J_{\text{CP}}$  5.9,  $\text{P}(\text{OCH}_2\text{CH}_3)_2$ ), 65.3 (d,  $^2J_{\text{CP}}$  4.9,  $\text{C}(4)\text{H}_2$ ), 122.0 ( $\text{C}(2)\text{H}$ ), 141.2 (d,  $^3J_{\text{CP}}$  7.7,  $\text{C}(3)\text{H}$ ), 165.8 ( $\text{C}=\text{O}$ ).



$^{31}\text{P}$  { $^1\text{H}$ } NMR (162 MHz,  $\text{CDCl}_3$ )  $\delta_{\text{P}}$ : -1.09 ( $\text{P}(\text{O})(\text{OEt})_2$ ).

HRMS ( $\text{NSI}^+$ )  $\text{C}_{10}\text{H}_{20}\text{O}_6\text{P}$  [ $\text{M}+\text{H}$ ] $^+$  found 267.0992, requires 267.0992 ( $\pm 0.0$  ppm).

$\nu_{\text{max}}$  (film,  $\text{cm}^{-1}$ ) 2983 (C-H), 1718 (C=O), 1666 (C=C), 1263 (P=O), 1018 (P-OEt).

### 2.3 3-(Trimethylsilyl)prop-2-yn-1-ol (SI-2)

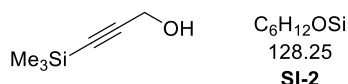

Adapting the procedure of Hoveyda and co-workers<sup>10</sup>, in a flame dried two-necked flask under inert atmosphere, propargylic alcohol (0.26 mL, 4.46 mmol, 1.0 eq) was dissolved in anhydrous THF (30 mL). The solution was cooled to  $-78^\circ\text{C}$  before  $n\text{-BuLi}$  (2.5 M in  $n\text{-hexane}$ , 3.8 mL, 9.37 mmol, 2.1 eq) was added slowly. After stirring the mixture for 45 min at  $-78^\circ\text{C}$  trimethylsilylchloride (1.24 mL, 9.81 mmol, 2.2 eq) was added dropwise. The reaction mixture was allowed to warm to rt over 3 h. The reaction was quenched by the addition of  $\text{H}_2\text{O}$  (5 mL) and 1 M  $\text{HCl}$  (15 mL) and stirred at rt until TLC ( $n\text{-hexane}$  :  $\text{EtOAc}$  9:1) indicated complete conversion of the intermediate TMS protected alcohol. The phases were separated, and the aqueous phase extracted with  $\text{Et}_2\text{O}$  ( $3 \times 15$  mL). The combined organic phases were washed with brine (40 mL), dried over  $\text{MgSO}_4$ , filtered and the solvent was removed under reduced pressure to afford the title compound as a yellow oil (529 mg, 92%).

$^1\text{H}$  NMR (400 MHz,  $\text{CDCl}_3$ )  $\delta_{\text{H}}$ : 0.19 (9H, s,  $\text{Si}(\text{CH}_3)_3$ ), 1.98 (1H, br s,  $\text{CH}_2\text{-OH}$ ), 4.28 (2H, s,  $\text{CH}_2\text{-OH}$ ).

Data in accordance with literature.<sup>11</sup>

### 2.4 (E)-3-(Trimethylsilyl)prop-2-en-1-ol (SI-3)

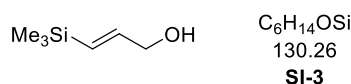

Following the procedure of Hoveyda and co-workers<sup>10</sup>, in a flame dried flask, compound **SI-2** (250 mg, 1.95 mmol, 1.0 eq) was dissolved in anhydrous  $\text{Et}_2\text{O}$  (5 mL) under an inert atmosphere and cooled to  $0^\circ\text{C}$ . Red-Al<sup>®</sup> (65 wt% in toluene, 1.22 mL, 3.9 mmol, 2.0 eq) was diluted with anhydrous  $\text{Et}_2\text{O}$  (equal volume) and added slowly. After complete addition, the reaction mixture was allowed to warm to rt and stir until TLC (Petrol :  $\text{EtOAc}$  6:1) indicated complete conversion. The reaction mixture was quenched with  $\text{H}_2\text{O}$  (1 mL) and  $\text{H}_2\text{SO}_4$  (3.6 M,

2 mL) and diluted by the addition of H<sub>2</sub>O (10 mL) and Et<sub>2</sub>O (10 mL). The phases were separated, and the aqueous phase extracted with Et<sub>2</sub>O (3 × 10 mL). The combined organic phases were washed with brine (15 mL), dried over MgSO<sub>4</sub>, filtered and the solvent removed under reduced pressure to afford the title compound as a colourless oil (253 mg, 99%).

<sup>1</sup>H NMR (400 MHz, CDCl<sub>3</sub>) δ<sub>H</sub>: 0.08 (9H, s, Si-(CH<sub>3</sub>)<sub>3</sub>), 4.18 (2H, dd, *J* 4.4, 1.8, C(1)H<sub>2</sub>), 5.92 (1H, dt, *J* 18.8, 1.7, C(3)H), 6.19 (1H, dt, *J* 18.8, 4.4, C(2)H).

Data in accordance with literature.<sup>12</sup>

## 2.5 (E)-3-(Trimethylsilyl)prop-2-en-1-yl-phosphoric acid, diethyl ester (15)

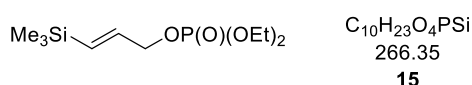

The title compound was prepared following General Procedure 1.1 using **SI-3** (195 mg, 1.5 mmol, 1.0 eq), diethyl chlorophosphate (0.32 mL, 2.25 mmol, 1.5 eq), Et<sub>3</sub>N (0.31 mL, 2.25 mmol, 1.5 eq) and DMAP (46.0 mg, 0.38 mmol, 0.25 eq) in anhydrous CH<sub>2</sub>Cl<sub>2</sub> (15 mL). The crude mixture was purified by silica column chromatography (*n*-hexane/EtOAc 1:1) to yield **15** as a colourless oil (366 mg, 91%).

<sup>1</sup>H NMR (400 MHz, CDCl<sub>3</sub>) δ<sub>H</sub>: 0.10 (9H, s, Si-(CH<sub>3</sub>)<sub>3</sub>), 1.36 (6H, td, *J* 7.0, 1.0, P(OCH<sub>2</sub>CH<sub>3</sub>)<sub>2</sub>), 4.14 (4H, dq, *J* 7.9, 7.1, P(OCH<sub>2</sub>CH<sub>3</sub>)<sub>2</sub>), 4.56 (2H, ddd, *J* 7.9, 4.4, 1.1, C(1)H<sub>2</sub>), 6.02 (1H, dt, *J* 18.7, 1.1, C(3)H), 6.10 (1H, dtd, *J* 18.6, 4.4, 0.7, C(2)H).

<sup>31</sup>P {<sup>1</sup>H} NMR (162 MHz, CDCl<sub>3</sub>) δ<sub>P</sub>: -0.80 (P(O)(OEt)<sub>2</sub>).

Data in accordance with literature.<sup>13</sup>

## 2.6 (Z)-4-[[*tert*-Butyldiphenylsilyl]oxy]-2-buten-1-ol (SI-4)

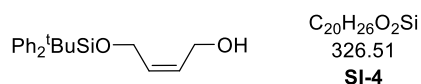

Following the procedure of Takahata and co-workers,<sup>14</sup> in a flame dried round bottom flask under an inert atmosphere NaH (60 wt% suspension in oil, 240 mg, 6.0 mmol, 1.2 eq) was washed twice with *n*-hexane, dried under reduced pressure and subsequently suspended in anhydrous THF (10 mL). *cis*-Butene-1,4-diol (0.41 mL, 5.0 mmol, 1.0 eq) was added slowly and the mixture stirred for 1 h. *tert*-Butyldiphenylsilylchloride (1.43 mL, 5.5 mmol, 1.1 eq) was added at 0 °C and the reaction allowed to stir at rt until TLC (EtOAc) indicated complete

conversion. The mixture was quenched with sat.  $\text{K}_2\text{CO}_3$  solution (10 mL), diluted with  $\text{Et}_2\text{O}$  (5 mL) and the phases separated. The aqueous phase was extracted with  $\text{Et}_2\text{O}$  ( $3 \times 10$  mL), the combined organic phases were washed with brine, dried over  $\text{MgSO}_4$ , filtered and the solvent removed under reduced pressure. The crude product was purified by silica column chromatography (Petrol/ $\text{EtOAc}$  5:1 to 2:1,  $R_f$  0.26 in Petrol :  $\text{EtOAc}$  4:1) to yield the title compound as colourless liquid (1.53 g, 94%).

$^1\text{H}$  NMR (400 MHz,  $\text{CDCl}_3$ )  $\delta_{\text{H}}$ : 1.11 (9H, s,  $\text{C}(\text{CH}_3)_3$ ), 1.86 (1H, br s, OH), 4.02 – 4.09 (2H, m,  $\text{CH}_2\text{-OSi}$ ), 4.29 – 4.34 (2H, m,  $\text{CH}_2\text{-OH}$ ), 5.63 – 5.80 (2H, m,  $\text{CH=CH}$ ), 7.41 – 7.49 (6H, m,  $2 \times \text{Ar}(2,4,6)\text{H}$ ), 7.71 – 7.78 (4H, m,  $2 \times \text{Ar}(3,5)\text{H}$ ).

Data in accordance with literature.<sup>14</sup>

## 2.7 (Z)-4-[[[(1,1-Dimethylethyl)diphenylsilyl]oxy]-2-buten-1-yl-phosphoric acid, diethyl ester (16)

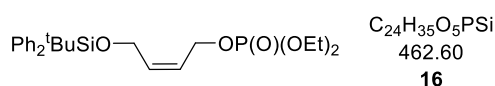

Following General Procedure 1.1, compound **SI-4** (1.00 g, 3.06 mmol, 1.0 eq), diethyl chlorophosphate (0.66 mL, 4.6 mmol, 1.5 eq),  $\text{Et}_3\text{N}$  (0.64 mL, 4.6 mmol, 1.5 eq) and DMAP (93.0 mg, 0.7 mmol, 0.25 eq) in anhydrous  $\text{CH}_2\text{Cl}_2$  (30 mL) gave the title compound after purification by silica column chromatography ( $n$ -hexane :  $\text{EtOAc}$  3:1 to 1:1,  $R_f$  0.33 in  $n$ -hexane :  $\text{EtOAc}$  1:1) as colourless liquid (1.01 g, 73%).

$^1\text{H}$  NMR (500 MHz,  $\text{CDCl}_3$ )  $\delta_{\text{H}}$ : 1.07 (9H, s,  $\text{C}(\text{CH}_3)_3$ ), 1.31 (6H, td,  $J$  7.1, 1.0,  $\text{P}(\text{OCH}_2\text{CH}_3)_2$ ), 4.08 (4H, dqd,  $J$  8.5, 7.1, 1.5,  $\text{P}(\text{OCH}_2\text{CH}_3)_2$ ), 4.30 (2H, ddt,  $J$  5.9, 1.8, 0.9,  $\text{C}(4)\text{H}_2$ ), 4.52 (2H, ddt,  $J$  8.9, 6.4, 1.2,  $\text{C}(1)\text{H}_2$ ), 5.64 (1H, dtt,  $J$  11.2, 6.5, 1.7,  $\text{C}(2)\text{H}$ ), 5.81 (1H, dtt,  $J$  11.5, 5.8, 1.5,  $\text{C}(3)\text{H}$ ), 7.39 – 7.46 (6H, m,  $2 \times \text{Ar}(2,4,6)\text{H}$ ), 7.67 – 7.72 (4H, m,  $2 \times \text{Ar}(3,5)\text{H}$ ).

$^{13}\text{C}\{^1\text{H}\}$  NMR (126 MHz,  $\text{CDCl}_3$ )  $\delta_{\text{C}}$ : 16.1 (d,  $^3J_{\text{CP}}$  6.7,  $\text{P}(\text{OCH}_2\text{CH}_3)_2$ ), 19.1 ( $\text{C}(\text{CH}_3)_3$ ), 26.7 ( $\text{C}(\text{CH}_3)_3$ ), 60.3 ( $\text{C}(4)\text{H}_2$ ), 63.2 (d,  $^2J_{\text{CP}}$  5.5,  $\text{C}(1)\text{H}_2$ ), 63.7 (d,  $^2J_{\text{CP}}$  5.8,  $\text{P}(\text{OCH}_2\text{CH}_3)_2$ ), 125.1 (d,  $^3J_{\text{CP}}$  7.2,  $\text{C}(2)\text{H}$ ), 127.7 ( $2 \times \text{ArC}(2,6)\text{H}$ ), 129.8 ( $2 \times \text{ArC}(4)\text{H}$ ), 133.1 ( $\text{C}(3)\text{H}$ ), 133.3 ( $2 \times \text{ArC}(1)$ ), 135.5 ( $2 \times \text{ArC}(3,5)\text{H}$ ).

$^{31}\text{P}\{^1\text{H}\}$  NMR (162 MHz,  $\text{CDCl}_3$ )  $\delta_{\text{P}}$ : -0.84 ( $\text{P}(\text{O})(\text{OEt})_2$ ).

HRMS ( $\text{NSI}^+$ )  $\text{C}_{24}\text{H}_{36}\text{O}_5\text{PSi}$   $[\text{M}+\text{H}]^+$  found 463.2057, requires 463.2064 (-1.5 ppm).

$\nu_{\text{max}}$  (film,  $\text{cm}^{-1}$ ) 2931 (C-H), 2856 (C-H), 1427 (Si-Ph), 1263 (P=O), 1107 (Si-Ph), 1018 (P-OEt).

## 2.8 2-Phenylprop-2-en-1-ol (SI-5)

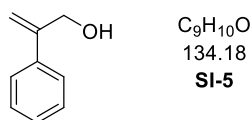

Following the procedure from Snaddon and co-workers,<sup>15</sup> in a flame dried three necked flask Mg turnings (1.46 g, 60.0 mmol, 3.0 eq) were covered with anhydrous Et<sub>2</sub>O under an inert atmosphere. Bromobenzene (5.32 mL, 50.0 mmol, 2.5 eq) was dissolved in 40 mL anhydrous Et<sub>2</sub>O and added dropwise in the presence of a small amount of iodide to help start the reaction. The rate of addition was adjusted to keep a constant reflux. After complete addition the reaction mixture was heated at reflux for 1 h and subsequently allowed to cool to rt. CuI (571 mg, 3.0 mmol, 0.15 eq) was added, the mixture stirred for 30 min, then propargylic alcohol (1.16 mL, 20.0 mmol, 1.0 eq) in anhydrous Et<sub>2</sub>O (10 mL) was added slowly, and after complete addition the reaction mixture heated at reflux for 24 h. The reaction was quenched with sat. NH<sub>4</sub>Cl solution (25 mL) at 0 °C, allowed to warm to rt and stir until all solids had dissolved (usually o.n.). The phases were separated, the aqueous phase extracted with Et<sub>2</sub>O (3 × 30 mL), the combined organic phases washed with brine, dried over MgSO<sub>4</sub>, filtered and the solvent removed under reduced pressure. The crude product was purified by silica column chromatography (Petrol : EtOAc 6:1 to 4:1, R<sub>f</sub> 0.26 in Petrol : EtOAc 4:1) to yield the title compound as a yellow liquid (1.81 g, 68%).

<sup>1</sup>H NMR (400 MHz, CDCl<sub>3</sub>) δ<sub>H</sub>: 1.74 (1H, br s, OH), 4.57 (2H, s, CH<sub>2</sub>-OH), 5.37 – 5.40 (1H, m, C=CH<sub>2</sub>), 5.49 - 5.52 (1H, m, C=CH<sub>2</sub>), 7.30 – 7.43 (3H, m, Ar(2,4,6)H), 7.45 – 7.51 (2H, m, Ar(3,5)H).

Data in accordance with literature.<sup>15</sup>

## 2.9 2-Phenyl-2-propen-1-yl-phosphoric acid, diethyl ester (SI-6)

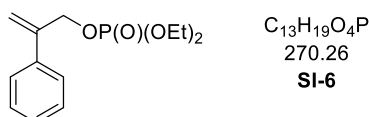

Following General Procedure 1.1, alcohol **SI-5** (1.00 g, 7.45 mmol, 1.0 eq), diethyl chlorophosphate (1.61 mL, 11.2 mmol, 1.5 eq), Et<sub>3</sub>N (1.56 mL, 11.2 mmol, 1.5 eq) and DMAP (228 mg, 1.86 mmol, 0.25 eq) in anhydrous CH<sub>2</sub>Cl<sub>2</sub> (50 mL) gave the title compound after

purification by silica column chromatography (*n*-hexane : EtOAc 1:1 to 1:3, *R*<sub>f</sub> 0.24 in *n*-hexane : EtOAc 1:1) as a pale yellow liquid (1.75 g, 84%).

<sup>1</sup>H NMR (400 MHz, CDCl<sub>3</sub>) δ<sub>H</sub>: 1.24 – 1.32 (6H, m, P(OCH<sub>2</sub>CH<sub>3</sub>)<sub>2</sub>), 4.00 – 4.10 (4H, m, P(OCH<sub>2</sub>CH<sub>3</sub>)<sub>2</sub>), 4.89 – 4.94 (2H, m, C(1)H<sub>2</sub>), 5.42 (1H, br s, C=CH<sub>2</sub>), 5.55 (1H, br s, C=CH<sub>2</sub>), 7.25 – 7.37 (3H, m, Ar(2,4,6)H), 7.40 – 7.47 (2H, m, Ar(3,5)H).

<sup>31</sup>P {<sup>1</sup>H} NMR (162 MHz, CDCl<sub>3</sub>) δ<sub>P</sub>: -1.09 (P(O)(OEt)<sub>2</sub>).

Data in accordance with literature.<sup>16</sup>

## 2.10 2-Phenylallyl methanesulfonate (17)

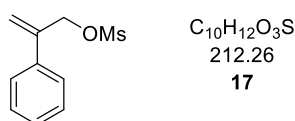

Following the procedure of Snaddon and co-workers,<sup>15</sup> in a flame dried round bottom flask methanesulfonic anhydride (2.05 g, 11.8 mmol, 2.0 eq) was added to a stirred solution of alcohol **SI-5** (5.88 mmol, 790 mg, 1.0 eq) in anhydrous CH<sub>2</sub>Cl<sub>2</sub> (15 mL). The mixture was cooled to 0 °C and *i*Pr<sub>2</sub>NEt (2.05 mL, 11.8 mmol, 2.0 eq) added dropwise. The reaction mixture was allowed to warm to rt and stir until TLC (Petrol : EtOAc 4:1) indicated complete conversion. The solvent was removed under reduced pressure and the crude product purified by silica column chromatography (Petrol : Et<sub>2</sub>O 5:1 to 2:1) to yield the title compound as a yellow liquid (748 mg, 60%).

<sup>1</sup>H NMR (400 MHz, CDCl<sub>3</sub>) δ<sub>H</sub>: 2.97 (3H, s, CH<sub>3</sub>), 5.16 (2H, d, *J* 1.1, C(1)H<sub>2</sub>), 5.54 (1H, m, C=CH<sub>2</sub>), 5.72 (1H, s, C=CH<sub>2</sub>), 7.34 – 7.44 (3H, m, Ar(2,4,6)H), 7.46 – 7.52 (2H, m, Ar(3,5)H).

Data in accordance with literature.<sup>15</sup>

## 2.11 (E)-4-(Methoxymethylamino)-4-oxo-2-butenic acid (SI-7)

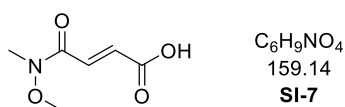

Following the procedure of Jacobi and co-workers,<sup>17</sup> a stirred solution of maleic anhydride (5.07 g, 51.7 mmol, 1.0 eq) and (*N,O*)-dimethylhydroxylamine hydrochloride (5.55 g, 56.8 mmol, 1.1 eq) in CHCl<sub>3</sub> (60 mL) was cooled to 0°C. Pyridine (9.2 mL, 113.7 mmol, 2.2 eq) was added slowly and the reaction allowed to warm to room temperature and stir for 24 h. The solvent was removed under reduced pressure, the residue diluted with H<sub>2</sub>O (20 mL) and

brine (20 mL) and extracted with CH<sub>2</sub>Cl<sub>2</sub> (4 × 30 mL). The combined extracts were washed with 1 M HCl (40 mL) and brine (40 mL), dried over MgSO<sub>4</sub>, filtered and the solvent removed under reduced pressure. The crude product was recrystallised from CH<sub>2</sub>Cl<sub>2</sub> to afford the title compound as yellow solid (2.74 g, 33%). **m.p.** (CH<sub>2</sub>Cl<sub>2</sub>) 129 – 131 °C.

**<sup>1</sup>H NMR** (500 MHz, CDCl<sub>3</sub>) δ<sub>H</sub>: 3.31 (3H, s, NCH<sub>3</sub>), 3.76 (3H, s, OCH<sub>3</sub>), 6.91 (1H, d, *J* 15.6, C(2)*H*), 7.54 (1H, d, *J* 15.6, C(3)*H*).

**<sup>13</sup>C{<sup>1</sup>H} NMR** (126 MHz, CDCl<sub>3</sub>) δ<sub>C</sub>: 32.5 (NCH<sub>3</sub>), 62.4 (OCH<sub>3</sub>), 131.7 (C(2)*H*), 133.6 (C(3)*H*), 164.5 (C(4)=O), 170.0 (C(1)=O).

**HRMS** (NSI<sup>-</sup>) C<sub>6</sub>H<sub>8</sub>NO<sub>4</sub> [M-H]<sup>-</sup> found 158.0461, requires 158.0459 (+1.4 ppm).

**ν<sub>max</sub>** (film, cm<sup>-1</sup>) 2943 (O-H), 1720 (C=O<sub>acid</sub>), 1660 (C=O<sub>amide</sub>), 1602 (C=C).

## 2.12 (*E*)-4-Hydroxy-*N*-methoxy-*N*-methyl-2-butenamide (SI-8)

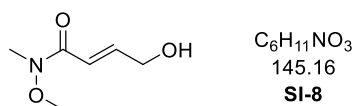

Following General Procedure 1.4, acid **SI-7** (3.0 g, 18.8 mmol, 1.0 eq), Et<sub>3</sub>N (2.89 mL, 20.7 mmol, 1.1 eq) and ethylchloroformate (1.98 mL, 20.7 mmol, 1.1 eq) in anhydrous THF (50 mL) followed by NaBH<sub>4</sub> (1.78 g, 47.1 mmol, 2.5 eq) in H<sub>2</sub>O (30 mL) gave the title compound after purification by silica column chromatography (EtOAc : Acetone 6:1, R<sub>f</sub> 0.31) as pale yellow oil (1.22 g, 45%).

**<sup>1</sup>H NMR** (400 MHz, CDCl<sub>3</sub>) δ<sub>H</sub>: 3.24 (3H, s, NCH<sub>3</sub>), 3.70 (3H, s, OCH<sub>3</sub>), 4.36 (2H, dd, *J* 4.0, 2.1, C(4)*H*<sub>2</sub>), 6.67 (1H, br dt, *J* 15.5, C(2)*H*), 7.03 (1H, dt, *J* 15.5, 4.0, C(3)*H*).

**<sup>13</sup>C{<sup>1</sup>H} NMR** (126 MHz, CDCl<sub>3</sub>) δ<sub>C</sub>: 32.3 (NCH<sub>3</sub>), 61.8 (OCH<sub>3</sub>), 62.2 (C(4)*H*<sub>2</sub>), 117.4 (C(2)*H*), 145.7 (C(3)*H*), 166.6 (C=O).

**HRMS** (NSI<sup>+</sup>) C<sub>6</sub>H<sub>12</sub>NO<sub>3</sub> [M+H]<sup>+</sup> found 146.0809, requires 146.0812 (-1.8 ppm).

**ν<sub>max</sub>** (film, cm<sup>-1</sup>) 3390 (O-H), 2937 (C-H), 1660 (C=O), 1612 (C=C).

### 2.13 (*E*)-(4-(methoxy(methyl)amino)-4-oxobut-2-en-1-yl) phosphoric acid, diethyl ester (26)

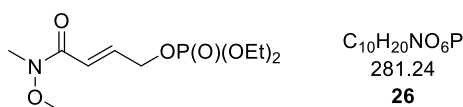

Following General Procedure 1.1, compound **29** (516 mg, 3.55 mmol, 1.0 eq), diethyl chlorophosphate (0.77 mL, 5.33 mmol, 1.5 eq), Et<sub>3</sub>N (0.74 mL, 5.33 mmol, 1.5 eq) and DMAP (108 mg, 0.88 mmol, 0.25 eq) in anhydrous CH<sub>2</sub>Cl<sub>2</sub> (35 mL) gave the title compound after purification by silica column chromatography (EtOAc : Acetone 4:1, R<sub>f</sub> 0.33 in EtOAc : Acetone 2:1) as pale yellow oil (819 mg, 82 %).

<sup>1</sup>H NMR (500 MHz, CDCl<sub>3</sub>) δ<sub>H</sub>: 1.36 (6H, td, *J* 7.1, 0.9, P(OCH<sub>2</sub>CH<sub>3</sub>)<sub>2</sub>), 3.27 (3H, s, N-CH<sub>3</sub>), 3.72 (3H, s, O-CH<sub>3</sub>), 4.12 – 4.19 (4H, m, P(OCH<sub>2</sub>CH<sub>3</sub>)<sub>2</sub>), 4.74 (2H, ddd, *J* 7.4, 4.3, 2.0, C(1)H<sub>2</sub>), 6.68 – 6.76 (1H, m, C(3)H), 6.96 (1H, dtd, *J* 15.4, 4.3, 1.7, C(2)H).

<sup>13</sup>C{<sup>1</sup>H} NMR (126 MHz, CDCl<sub>3</sub>) δ<sub>C</sub>: 16.1 (d, <sup>3</sup>*J*<sub>CP</sub> 6.6, P(OCH<sub>2</sub>CH<sub>3</sub>)<sub>2</sub>), 32.3 (N-CH<sub>3</sub>), 61.8 (O-CH<sub>3</sub>), 64.0 (d, <sup>2</sup>*J*<sub>CP</sub> 5.9, P(OCH<sub>2</sub>CH<sub>3</sub>)<sub>2</sub>), 66.0 (d, <sup>2</sup>*J*<sub>CP</sub> 5.2, C(1)H<sub>2</sub>), 119.5 (C(3)H), 139.8 (d, <sup>3</sup>*J*<sub>CP</sub> 7.4, C(2)H), 165.7 (C=O).

<sup>31</sup>P{<sup>1</sup>H} NMR (162 MHz, CDCl<sub>3</sub>) δ<sub>P</sub>: -1.07 (OP(O)(OEt)<sub>2</sub>).

HRMS (NSI<sup>+</sup>) C<sub>10</sub>H<sub>21</sub>NO<sub>6</sub>P [M+H]<sup>+</sup> found 282.1102, requires 282.1101 (+0.4 ppm).

ν<sub>max</sub> (CHCl<sub>3</sub>, cm<sup>-1</sup>) 2983 (C-H), 2912 (C-H), 1670 (C=O), 1633 (C=C), 1261 (P=O), 1024 (P-O).

### 2.14 (*E*)-4-Oxo-4-(phenylamino)-2-butenic acid, ethyl ester (SI-9)

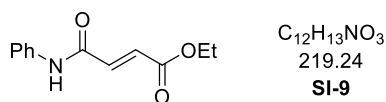

Following General Procedure 1.2 with modifications, monoethyl fumarate (6.0 g, 41.6 mmol, 1.0 eq), aniline (5.3 mL, 58.2 mmol, 1.4 eq), EDCI·HCl (10.3 g, 54.1 mmol, 1.3 eq) and DMAP (508 mg, 4.2 mmol, 0.1 eq) in CH<sub>2</sub>Cl<sub>2</sub> (100 mL) gave the title compound after recrystallisation from Et<sub>2</sub>O as off-white solid (7.4 g, 81 %). **m.p.** (Et<sub>2</sub>O) 113-116 °C.

<sup>1</sup>H NMR (500 MHz, CDCl<sub>3</sub>) δ<sub>H</sub>: 1.33 (3H, t, *J* 7.1, OCH<sub>2</sub>CH<sub>3</sub>), 4.27 (2H, q, *J* 7.1, OCH<sub>2</sub>CH<sub>3</sub>), 6.96 (1H, d, *J* 15.3, C(2)H), 7.12 – 7.20 (2H, m, C(3)H, ArC(4)H), 7.34 (2H, t, *J* 7.9, ArC(3,5)H), 7.62 (2H, d, *J* 7.7, ArC(2,6)H), 8.15 (1H, br s, NH).

$^{13}\text{C}\{^1\text{H}\}$  NMR (126 MHz,  $\text{CDCl}_3$ )  $\delta_{\text{C}}$ : 14.1 ( $\text{OCH}_2\text{CH}_3$ ), 61.5 ( $\text{OCH}_2\text{CH}_3$ ), 120.1 ( $\text{ArC}(2,6)\text{H}$ ), 125.0 ( $\text{ArC}(4)\text{H}$ ), 129.1 ( $\text{ArC}(3,5)\text{H}$ ), 131.2 ( $\text{C}(2)\text{H}$ ), 137.0 ( $\text{C}(3)\text{H}$ ), 137.4 ( $\text{ArC}(1)$ ), 161.6 ( $\text{C}(4)=\text{O}$ ), 165.8 ( $\text{C}(1)=\text{O}$ ).

**HRMS** ( $\text{NSI}^+$ )  $\text{C}_{12}\text{H}_{14}\text{NO}_3$   $[\text{M}+\text{H}]^+$  found 220.0964, requires 220.0968 (−1.9 ppm).

$\nu_{\text{max}}$  ( $\text{CHCl}_3$ ,  $\text{cm}^{-1}$ ) 3350 (N-H), 2978 (C-H), 1705 ( $\text{C}=\text{O}_{\text{ester}}$ ), 1678 ( $\text{C}=\text{O}_{\text{amide}}$ ), 1649 (C=C).

## 2.15 (E)-4-oxo-4-(phenylamino)-2-butenic acid (SI-10)

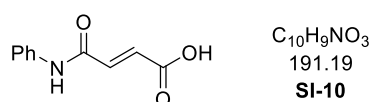

Following General Procedure 1.3, ester **SI-9** (2.7 g, 12.3 mmol, 1.0 eq) and  $\text{LiOH}\cdot\text{H}_2\text{O}$  (568 mg, 13.5 mmol, 1.1 eq) in  $\text{H}_2\text{O} : \text{THF}$  1:1 (13 mL) gave the title compound after extraction with EtOAc as off-white solid (2.97 g, 99%), which was used without further purification.

$^1\text{H}$  NMR (400 MHz,  $\text{DMSO}-d_6$ )  $\delta_{\text{H}}$ : 6.66 (1H, d,  $J$  15.4, CH), 7.07 – 7.12 (1H, m,  $\text{ArC}(4)\text{H}$ ), 7.15 (1H, d,  $J$  15.4, CH), 7.31 – 7.37 (2H, m,  $\text{ArC}(2,6)\text{H}$ ), 7.65 – 7.70 (2H, m,  $\text{ArC}(3,5)\text{H}$ ), 10.52 (1H, s,  $\text{C}(\text{O})\text{OH}$ ).

## 2.16 (E)-4-hydroxy-N-phenyl-2-butenamide (SI-11)

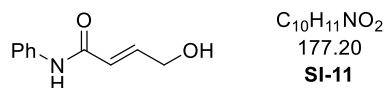

Following General Procedure 1.4, acid **SI-10** (2.5 g, 13.0 mmol, 1.0 eq),  $\text{Et}_3\text{N}$  (2.0 mL, 14.3 mmol, 1.1 eq) and ethyl chloroformate (1.4 mL, 14.3 mmol, 1.1 eq) in anhydrous THF (45 mL) followed by  $\text{NaBH}_4$  (1.2 g, 32.7 mmol, 2.5 eq) in  $\text{H}_2\text{O}$  (25 mL) gave the title compound after recrystallisation from EtOAc as colourless solid (636 mg, 28%). **m.p.** (EtOAc) 160–163 °C.

$^1\text{H}$  NMR (500 MHz,  $\text{MeOH}-d_4$ )  $\delta_{\text{H}}$ : 4.29 (2H, dd,  $J$  3.9, 2.1,  $\text{C}(4)\text{H}_2$ ), 6.37 (1H, dt,  $J$  15.3, 2.1,  $\text{C}(2)\text{H}$ ), 6.99 (1H, dt,  $J$  15.3, 3.9,  $\text{C}(3)\text{H}$ ), 7.09 (1H, t,  $J$  7.4,  $\text{ArC}(4)\text{H}$ ), 7.28 – 7.34 (2H, m,  $\text{ArC}(2,6)\text{H}$ ), 7.61 (d,  $J$  7.7,  $\text{ArC}(3,5)\text{H}$ ).

Data in accordance with literature.<sup>18</sup>



## 2.17 (E)-4-oxo-4-(phenylamino)but-2-en-1-yl phosphoric acid, diethyl ester (32)

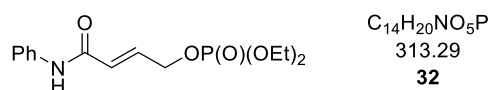

Following General Procedure 1.1, alcohol **SI-11** (550 mg, 3.1 mmol, 1.0 eq), diethyl chlorophosphate (0.67 mL, 4.6 mmol, 1.5 eq), Et<sub>3</sub>N (0.65 mL, 4.6 mmol, 1.5 eq) and DMAP (95 mg, 0.8 mmol, 0.25 eq) in anhydrous CH<sub>2</sub>Cl<sub>2</sub> (30 mL) gave the title compound after purification by Biotage® Isolera™ 4 [SNAP Ultra 25 g, 75 mL min<sup>-1</sup>, petrol : EtOAc (50:50 5 CV, 50:50 to 0:100 14 CV, 0:100 6 CV), R<sub>f</sub> 0.28 in EtOAc] as pale yellow oil, which solidified upon freezing. Recrystallisation from toluene afforded the title compound as colourless crystalline solid (864 mg, 89%). **m.p.** (EtOAc) 76-79 °C.

**<sup>1</sup>H NMR** (500 MHz, CDCl<sub>3</sub>) δ<sub>H</sub>: 1.33 (6H, t, *J* 7.1, P(OCH<sub>2</sub>CH<sub>3</sub>)<sub>2</sub>), 4.13 (4H, app. p, *J* 7.3, P(OCH<sub>2</sub>CH<sub>3</sub>)<sub>2</sub>), 4.70 (2H, ddd, *J* 7.0, 4.2, 1.9, C(1)H<sub>2</sub>), 6.38 (1H, dt, *J* 15.1, 1.8, C(3)H), 6.95 (1H, dtd, *J* 15.2, 4.2, 1.8, C(2)H), 7.09 (1H, t, *J* 7.4, ArC(4)H), 7.30 (2H, t, *J* 7.9, ArC(3,5)H), 7.65 (2H, d, *J* 7.9, ArC(2,6)H), 8.63 (1H, s, NH).

**<sup>13</sup>C{<sup>1</sup>H} NMR** (126 MHz, CDCl<sub>3</sub>) δ<sub>C</sub>: 16.1 (d, <sup>3</sup>*J*<sub>CP</sub> 6.6, P(OCH<sub>2</sub>CH<sub>3</sub>)<sub>2</sub>), 64.2 (d, <sup>2</sup>*J*<sub>CP</sub> 5.9, P(OCH<sub>2</sub>CH<sub>3</sub>)<sub>2</sub>), 65.9 (d, <sup>2</sup>*J*<sub>CP</sub> 5.4, C(1)H<sub>2</sub>), 119.9 (ArC(2,6)H), 124.2 (ArC(4)H), 125.2 (C(3)H), 128.9 (ArC(3,5)H), 137.7 (d, <sup>3</sup>*J*<sub>CP</sub> 7.5, C(2)H), 138.3 (ArC(1)), 163.2 (C=O).

**<sup>31</sup>P{<sup>1</sup>H} NMR** (121 MHz, CDCl<sub>3</sub>) δ<sub>P</sub>: -1.74 (OP(O)(OEt)<sub>2</sub>).

**HRMS** (ESI<sup>+</sup>) C<sub>14</sub>H<sub>20</sub>NO<sub>5</sub>PNa [M+Na]<sup>+</sup> found 336.0963, requires 336.0971 (-2.4 ppm).

**ν<sub>max</sub>** (film, cm<sup>-1</sup>) 3269 (N-H), 3130 (=C-H), 2991 (C-H), 1687 (C=O), 1651 (C=C), 1600 (C=C<sub>Ar</sub>), 1492 (C=C<sub>Ar</sub>), 1240 (P=O), 1018 (P-O).

## 2.18 (E)-4-(Methylphenylamino)-4-oxo-2-butenic acid, ethyl ester (SI-12)

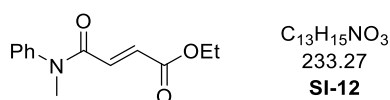

Adapting the procedure of Snaddon and co-workers,<sup>5</sup> in a flame dried flask under argon atmosphere, NaH (602 mg, 15.0 mmol, 1.1 eq) was activated by tritulating with hexane (3 × 5 mL). Residual solvent was removed under reduced pressure and the grey powder subsequently suspended in anhydrous THF (35 mL). Ester **SI-9** (3.0 g, 13.6 mmol, 1.0 eq) dissolved in anhydrous THF (35 mL) was slowly added to the NaH suspension at 0 °C. After gas expulsion had ceased, the reaction mixture was allowed to warm to room temperature.

MeI (0.93 mL, 15.0 mmol, 1.1 eq) was added, the flask sealed and heated to 80 °C for 16 h. After cooling to room temperature, the reaction was quenched with sat. NH<sub>4</sub>Cl solution (40 mL), the phases separated and the aqueous phase extracted with Et<sub>2</sub>O (3 × 60 mL). The combined organic phases were dried over MgSO<sub>4</sub>, filtered and the solvent removed under reduced pressure to afford the crude product as black oil. Purification by Biotage® Isolera™ 4 [SNAP Ultra 50 g, 100 mL min<sup>-1</sup>, petrol : EtOAc 4:1 (15 CV), R<sub>f</sub> 0.16] afforded the title compound as off-white solid (1.73 g, 55 %). **m.p.** (petrol) 74-77 °C.

<sup>1</sup>H NMR (500 MHz, CDCl<sub>3</sub>) δ<sub>H</sub>: 1.24 (3H, t, *J* 7.1, OCH<sub>2</sub>CH<sub>3</sub>), 3.38 (3H, s, NCH<sub>3</sub>), 4.16 (2H, q, *J* 7.1, OCH<sub>2</sub>CH<sub>3</sub>), 6.85 (2H, s, C(2)*H*, C(3)*H*), 7.14 – 7.19 (2H, m, ArC(2,6)*H*), 7.34 – 7.38 (1H, m, ArC(4)*H*), 7.40 – 7.46 (2H, m, ArC(3,5)*H*).

<sup>13</sup>C{<sup>1</sup>H} NMR (126 MHz, CDCl<sub>3</sub>) δ<sub>C</sub>: 14.2 (OCH<sub>2</sub>CH<sub>3</sub>), 37.8 (NCH<sub>3</sub>), 61.1 (OCH<sub>2</sub>CH<sub>3</sub>), 127.1 (ArC(2,6)*H*), 128.2 (ArC(4)*H*), 130.0 (ArC(3,5)*H*), 131.1 (=CH), 134.3 (=CH), 142.7 (ArC(1)), 164.1 (C(4)=O), 165.8 (C(1)=O).

HRMS (NSI<sup>+</sup>) C<sub>13</sub>H<sub>16</sub>NO<sub>3</sub> [M+H]<sup>+</sup> found 234.1127, requires 234.1125 (+1.0 ppm).

ν<sub>max</sub> (film, cm<sup>-1</sup>) 3049 (=C-H), 2991 (C-H), 1716 (C=O<sub>ester</sub>), 1660 (C=O<sub>amide</sub>), 1631 (C=C), 1593 (C=C<sub>Ar</sub>), 1492 (C=C<sub>Ar</sub>).

## 2.19 (*E*)-4-(Methylphenylamino)-4-oxo-2-butenic acid (SI-13)

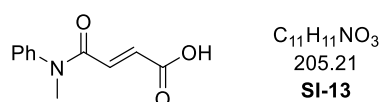

Following General Procedure 1.3, ester **SI-12** (1.5 g, 6.4 mmol, 1.0 eq) and LiOH·H<sub>2</sub>O (297 mg, 7.0 mmol, 1.1 eq) in H<sub>2</sub>O : THF 1:1 (7 mL) gave the title compound after extraction with CH<sub>2</sub>Cl<sub>2</sub> as off-white solid (1.28 g, 97%), which was used without further purification.

<sup>1</sup>H NMR (500 MHz, DMSO) δ<sub>H</sub>: 3.28 (3H, s, NCH<sub>3</sub>), 6.55 (1H, d, *J* 15.3, C(2)*H*), 6.64 (1H, d, *J* 15.3, C(3)*H*), 7.31 – 7.36 (2H, m, ArC(2,6)*H*), 7.38 – 7.44 (1H, m, ArC(4)*H*), 7.46 – 7.52 (2H, m, ArC(3,5)*H*).

## 2.20 (E)-4-Hydroxy-N-methyl-N-phenyl-2-butenamide (SI-14)

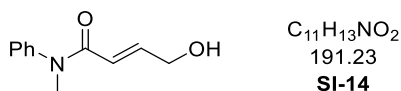

Following General Procedure 1.4, acid **SI-13** (2.6 g, 13.0 mmol, 1.0 eq),  $Et_3N$  (2.0 mL, 14.3 mmol, 1.1 eq) and ethyl chloroformate (1.4 mL, 14.3 mmol, 1.1 eq) in anhydrous THF (45 mL) followed by  $NaBH_4$  (1.2 g, 32.7 mmol, 2.5 eq) in  $H_2O$  (25 mL) gave the title compound after purification by silica column chromatography ( $CH_2Cl_2$  : Acetone 7:3,  $R_f$  0.48 in  $CH_2Cl_2$  : Acetone 1:1) as colourless oil (1.7 g, 70%), which solidified slowly. **m.p.** (EtOAc) 70-73 °C.

**$^1H$  NMR** (500 MHz,  $CDCl_3$ )  $\delta_H$ : 1.84 (1H, br s, OH), 3.34 (3H, s,  $NCH_3$ ), 4.19 – 4.24 (2H, m,  $C(4)H_2$ ), 6.00 (1H, d,  $J$  15.1,  $C(2)H$ ), 6.98 (1H, dt,  $J$  15.2, 4.2,  $C(3)H$ ), 7.15 – 7.19 (2H, m,  $ArC(2,6)H$ ), 7.30 – 7.35 (1H, m,  $ArC(4)H$ ), 7.38 – 7.43 (2H, m,  $ArC(3,5)H$ ).

**$^{13}C\{^1H\}$  NMR** (126 MHz,  $CDCl_3$ )  $\delta_C$ : 37.5 ( $NCH_3$ ), 62.1 ( $C(4)H_2$ ), 120.1 ( $C(2)H$ ), 127.2 ( $ArC(2,6)H$ ), 127.6 ( $ArC(4)H$ ), 129.6 ( $ArC(3,5)H$ ), 143.4 ( $ArC(1)$ ), 143.9 ( $C(3)H$ ), 165.8 ( $C=O$ ).

**HRMS** ( $NSI^-$ )  $C_{11}H_{12}NO_2$  [ $M-H$ ] $^-$  found 190.0877, requires 190.0874 (+1.8 ppm).

$\nu_{max}$  (film,  $cm^{-1}$ ) 3385 (O-H), 3053 (Ar-H), 2864 (C-H), 1654 ( $C=O$ ), 1600 ( $C=C$ ), 1492 ( $C=C_{Ar}$ ).

## 2.21 (E)-(4-(Methyl(phenyl)amino)-4-oxobut-2-en-1-yl) phosphoric acid, diethyl ester (33)

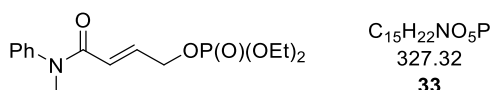

Following General Procedure 1.1, alcohol **SI-14** (516 mg, 2.7 mmol, 1.0 eq), diethyl chlorophosphate (0.58 mL, 4.0 mmol, 1.5 eq),  $Et_3N$  (0.56 mL, 4.0 mmol, 1.5 eq) and DMAP (82 mg, 0.7 mmol, 0.25 eq) in anhydrous  $CH_2Cl_2$  (30 mL) gave the title compound after purification by silica column chromatography (EtOAc : 1% *i*PrOH to 5% *i*PrOH,  $R_f$  0.41 in EtOAc : 10% *i*PrOH) as pale yellow oil (670 mg, 76%).

**$^1H$  NMR** (500 MHz,  $CDCl_3$ )  $\delta_H$ : 1.23 (6H, t,  $J$  7.1,  $P(OCH_2CH_3)_2$ ), 3.34 (3H, s,  $NCH_3$ ), 3.92 – 4.01 (4H, m,  $P(OCH_2CH_3)_2$ ), 4.53 – 4.62 (2H, m,  $C(1)H_2$ ), 6.01 (1H, d,  $J$  15.1,  $C(3)H$ ), 6.88 (1H, dtd,  $J$  15.1, 4.4, 1.4,  $C(2)H$ ), 7.14 – 7.19 (2H, m,  $ArC(2,6)H$ ), 7.30 – 7.35 (1H,  $ArC(4)H$ ), 7.37 – 7.43 (2H,  $ArC(3,5)H$ ).

$^{13}\text{C}\{^1\text{H}\}$  NMR (126 MHz,  $\text{CDCl}_3$ )  $\delta_{\text{C}}$ : 16.2 (d,  $^3J_{\text{CP}}$  6.6,  $\text{P}(\text{OCH}_2\text{CH}_3)_2$ ), 37.6 ( $\text{NCH}_3$ ), 64.0 (d,  $^2J_{\text{CP}}$  5.9,  $\text{P}(\text{OCH}_2\text{CH}_3)_2$ ), 65.8 (d,  $^2J_{\text{CP}}$  5.0,  $\text{C}(1)\text{H}_2$ ), 122.1 ( $\text{C}(3)\text{H}$ ), 127.4 ( $\text{ArC}(2,6)\text{H}$ ), 127.8 ( $\text{ArC}(4)\text{H}$ ), 129.7 ( $\text{ArC}(3,5)\text{H}$ ), 138.3 (d,  $^3J_{\text{CP}}$  7.5,  $\text{C}(2)\text{H}$ ), 143.4 ( $\text{ArC}(1)$ ), 165.1 ( $\text{C}=\text{O}$ ).

$^{31}\text{P}\{^1\text{H}\}$  NMR (202 MHz,  $\text{CDCl}_3$ )  $\delta_{\text{P}}$ : -1.26 ( $\text{OP}(\text{O})(\text{OEt})_2$ ).

HRMS ( $\text{NSI}^+$ )  $\text{C}_{15}\text{H}_{23}\text{NO}_5\text{P}$   $[\text{M}+\text{H}]^+$  found 328.1310, requires 328.1308 (+0.5 ppm).

$\nu_{\text{max}}$  (film,  $\text{cm}^{-1}$ ) 2983 (C-H), 1670 ( $\text{C}=\text{O}$ ), 1631 ( $\text{C}=\text{C}$ ), 1595 ( $\text{C}=\text{C}_{\text{Ar}}$ ), 1496 ( $\text{C}=\text{C}_{\text{Ar}}$ ), 1263 ( $\text{P}=\text{O}$ ).

## 2.22 (E)-4-[Methyl(phenylmethyl)amino]-4-oxo-2-butenic acid, ethyl ester (SI-15)

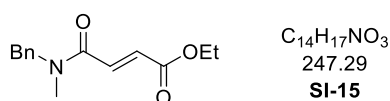

Following General Procedure 1.2 monoethyl fumarate (7.5 g, 52.0 mmol, 1.0 eq), *N*-benzylmethylamine (7.4 mL, 57.2 mmol, 1.1 eq), EDCI-HCl (10.9 g, 57.2 mmol, 1.1 eq) and DMAP (636 mg, 5.2 mmol, 0.1 eq) in  $\text{CH}_2\text{Cl}_2$  (130 mL) gave a rotameric mixture (55:45) of the title compound as yellow oil, (12.7 g, 98%), which was used without further purification.

$^1\text{H}$  NMR (400 MHz,  $\text{CDCl}_3$ ) *major rotamer*  $\delta_{\text{H}}$ : 1.31 (3H, t,  $J$  7.1,  $\text{OCH}_2\text{CH}_3$ ), 3.02 (3H, s,  $\text{NCH}_3$ ), 4.24 (2H, app. dq,  $J$  14.2, 7.1,  $\text{OCH}_2\text{CH}_3$ ), 4.66 (2H, s,  $\text{NCH}_2$ ), 6.85 (1H, d,  $J$  15.3,  $\text{C}(2)\text{H}$  or  $\text{C}(3)\text{H}$ ), 7.14 – 7.19 (1H, m,  $\text{ArC}(4)\text{H}$ ), 7.23 – 7.39 (4H, m,  $\text{ArC}(2,3,5,6)\text{H}$ ), 7.43 (1H, d,  $J$  15.3,  $\text{C}(2)\text{H}$  or  $\text{C}(3)\text{H}$ ); *minor rotamer (selected)*  $\delta_{\text{H}}$ : 1.28 (3H, t,  $J$  7.1,  $\text{OCH}_2\text{CH}_3$ ), 3.00 (3H, s,  $\text{NCH}_3$ ), 4.61 (2H, s,  $\text{NCH}_2$ ), 6.85 (1H, d,  $J$  15.3,  $\text{C}(2)\text{H}$  or  $\text{C}(3)\text{H}$ ), 7.41 (1H, d,  $J$  15.3,  $\text{C}(2)\text{H}$  or  $\text{C}(3)\text{H}$ ).

## 2.23 (E)-4-[Methyl(phenylmethyl)amino]-4-oxo-2-butenic acid (SI-16)

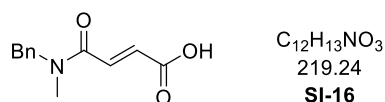

Following General Procedure 1.3, ester **SI-15** (12.1 g, 48.9 mmol, 1.0 eq) and  $\text{LiOH}\cdot\text{H}_2\text{O}$  (2.3 g, 53.8 mmol, 1.1 eq) in  $\text{H}_2\text{O} : \text{THF}$  1:1 (50 mL) gave a rotameric mixture (55:45) of the title compound after extraction with  $\text{CH}_2\text{Cl}_2$  as yellow oil (9.9 g, 93%), which was used without further purification.

$^1\text{H}$  NMR (400 MHz,  $\text{MeOH}-d_4$ ) *major rotamer*  $\delta_{\text{H}}$ : 3.08 (3H, s,  $\text{NCH}_3$ ), 4.67 (2H, s,  $\text{NCH}_2$ ), 6.71 (1H, d,  $J$  15.3,  $\text{C}(2)\text{H}$  or  $\text{C}(3)\text{H}$ ), 7.19 – 7.42 (5H, m,  $5 \times \text{ArH}$ ), 7.49 (1H, dd,  $J$  15.4, 13.8 Hz, 1H), 7.51 (1H, d,  $J$  15.3,  $\text{C}(2)\text{H}$  or  $\text{C}(3)\text{H}$ ); *minor rotamer (selected)*  $\delta_{\text{H}}$ : 3.01 (3H, s,  $\text{NCH}_3$ ), 4.72 (2H, s,  $\text{NCH}_2$ ), 6.70 (1H, d,  $J$  15.3,  $\text{C}(2)\text{H}$  or  $\text{C}(3)\text{H}$ ), 7.47 (1H, d,  $J$  15.3,  $\text{C}(2)\text{H}$  or  $\text{C}(3)\text{H}$ ).

## 2.24 (E)-4-Hydroxy-N-methyl-N-(phenylmethyl)-2-butenamide (SI-17)

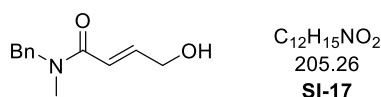

Following General Procedure 1.4, acid **SI-16** (9.8 g, 44.8 mmol, 1.0 eq),  $\text{Et}_3\text{N}$  (6.8 mL, 49.2 mmol, 1.1 eq) and ethyl chloroformate (4.7 mL, 49.2 mmol, 1.1 eq) in anhydrous THF (110 mL) followed by  $\text{NaBH}_4$  (4.2 g, 112 mmol, 2.5 eq) in  $\text{H}_2\text{O}$  (70 mL) gave the title compound as a rotameric mixture (55:45) after purification by silica column chromatography (petrol : EtOAc 1:1 to EtOAc,  $R_f$  0.20 in EtOAc) as yellow oil (6.2 g, 67%). Attempts to remove remaining impurities were unsuccessful, so alcohol **SI-17** was used as obtained after silica column chromatography.

$^1\text{H}$  NMR (500 MHz,  $\text{CDCl}_3$ ) *major rotamer*  $\delta_{\text{H}}$ : 2.97 (3H, s,  $\text{NCH}_3$ ), 4.31 – 4.36 (2H, m,  $\text{C}(4)\text{H}_2$ ), 4.62 (2H, s,  $\text{NCH}_2$ ), 6.52 – 6.63 (1H, m,  $\text{C}(2)\text{H}$  or  $\text{C}(3)\text{H}$ ), 6.96 – 7.04 (1H, m,  $\text{C}(2)\text{H}$  or  $\text{C}(3)\text{H}$ ), 7.12 – 7.18 (1H, m,  $\text{Ar}(4)\text{H}$ ), 7.19 – 7.39 (4H, m,  $\text{Ar}(2,3,5,6)\text{H}$ ); *minor rotamer (selected)*  $\delta_{\text{H}}$ : 2.96 (3H, s,  $\text{NCH}_3$ ), 4.26 – 4.31 (2H, m,  $\text{C}(4)\text{H}_2$ ), 4.58 (2H, s,  $\text{NCH}_2$ ).

$^{13}\text{C}\{^1\text{H}\}$  NMR (126 MHz,  $\text{CDCl}_3$ ) *major rotamer*  $\delta_{\text{C}}$ : 35.0 ( $\text{NCH}_3$ ), 51.1 ( $\text{NCH}_2$ ), 62.0 ( $\text{C}(4)\text{H}_2$ ), 118.8 ( $\text{C}(2)\text{H}$  or  $\text{C}(3)\text{H}$ ), 126.5 ( $\text{ArC}(4)\text{H}$ ), 128.0 ( $\text{ArC}(2,6)\text{H}$  or  $\text{ArC}(3,5)\text{H}$ ), 128.6 ( $\text{ArC}(2,6)\text{H}$  or  $\text{ArC}(3,5)\text{H}$ ), 137.1 ( $\text{ArC}(1)$ ), 145.3 ( $\text{C}(2)\text{H}$  or  $\text{C}(3)\text{H}$ ), 166.8 ( $\text{C}=\text{O}$ ); *minor rotamer (selected)*  $\delta_{\text{C}}$ : 34.0 ( $\text{NCH}_3$ ), 53.4 ( $\text{NCH}_2$ ), 62.0 ( $\text{C}(4)\text{H}_2$ ), 136.5 ( $\text{ArC}(1)$ ), 145.2 ( $\text{C}(2)\text{H}$  or  $\text{C}(3)\text{H}$ ), 167.3 ( $\text{C}=\text{O}$ ).

## 2.25 (E)-(4-(Benzyl(methyl)amino)-4-oxobut-2-en-1-yl) phosphoric acid, diethyl ester (34)

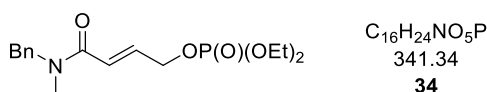

Following General Procedure 1.1, alcohol **SI-17** (560 mg, 2.7 mmol, 1.0 eq), diethyl chlorophosphate (0.59 mL, 4.1 mmol, 1.5 eq),  $\text{Et}_3\text{N}$  (0.57 mL, 4.1 mmol, 1.5 eq) and DMAP (83 mg, 0.7 mmol, 0.25 eq) in anhydrous  $\text{CH}_2\text{Cl}_2$  (30 mL) gave the title compound as a rotameric mixture (55:45) after purification by silica column chromatography (EtOAc : 5% *i*PrOH to 10% *i*PrOH) as colourless oil (730 mg, 78%). Attempts to remove remaining impurities were unsuccessful, so phosphate **34** was used as obtained after silica column chromatography (ca. 25% impurities).

**<sup>1</sup>H NMR** (500 MHz, CDCl<sub>3</sub>) *major rotamer* δ<sub>H</sub>: 1.28 – 1.33 (6H, m, P(OCH<sub>2</sub>CH<sub>3</sub>)<sub>2</sub>), 2.96 (3H, s, NCH<sub>3</sub>), 4.06 – 4.15 (4H, m, P(OCH<sub>2</sub>CH<sub>3</sub>)<sub>2</sub>), 4.61 (2H, s, NCH<sub>2</sub>), 4.69 (2H, ddd, *J* 7.5, 4.3, 2.0, C(1)H<sub>2</sub>), 6.59 (1H, dt, *J* 15.0, 2.0, C(3)H), 6.84 – 6.94 (1H, m, C(2)H), 7.11 – 7.16 (1H, m, Ar(4)H), 7.17 – 7.35 (4H, m, Ar(2,3,5,6)H); *minor rotamer (selected)* δ<sub>H</sub>: 1.20 – 1.25 (6H, m, P(OCH<sub>2</sub>CH<sub>3</sub>)<sub>2</sub>), 2.96 (3H, s, NCH<sub>3</sub>), 3.97 – 4.03 (4H, m, P(OCH<sub>2</sub>CH<sub>3</sub>)<sub>2</sub>), 4.56 (2H, s, NCH<sub>2</sub>), 4.63 (2H, ddd, *J* 7.6, 4.3, 2.0, C(1)H<sub>2</sub>), 6.53 (1H, dt, *J* 15.0, 2.0, C(3)H).

**<sup>13</sup>C{<sup>1</sup>H} NMR** (126 MHz, CDCl<sub>3</sub>) *major rotamer* δ<sub>C</sub>: 16.0 (d, <sup>3</sup>*J*<sub>CP</sub> 6.8, P(OCH<sub>2</sub>CH<sub>3</sub>)<sub>2</sub>), 34.9 (NCH<sub>3</sub>), 51.1 (NCH<sub>2</sub>), 63.9 – 64.0 (m, P(OCH<sub>2</sub>CH<sub>3</sub>)<sub>2</sub>), 66.0 (d, <sup>2</sup>*J*<sub>CP</sub> 5.2, C(1)H<sub>2</sub>), 121.1 (C(3)H), 126.5 (ArC(4)H), 128.0 (ArC(2,6)H or ArC(3,5)H), 128.9 (ArC(2,6)H or ArC(3,5)H), 137.0 (ArC(1)), 139.0 (C(2)H), 165.7 (C=O); *minor rotamer (selected)* δ<sub>C</sub>: 16.1 (d, <sup>3</sup>*J*<sub>CP</sub> 6.8, P(OCH<sub>2</sub>CH<sub>3</sub>)<sub>2</sub>), 34.1 (NCH<sub>3</sub>), 53.3 (NCH<sub>2</sub>), 65.9 (d, <sup>2</sup>*J*<sub>CP</sub> 5.1, C(1)H<sub>2</sub>), 121.0 (C(3)H), 136.4 (ArC(1)), 139.0 (C(2)H), 166.2 (C=O).

**<sup>31</sup>P{<sup>1</sup>H} NMR** (162 MHz, CDCl<sub>3</sub>) *major rotamer* δ<sub>P</sub>: -1.09 (OP(O)(OEt)<sub>2</sub>); *minor rotamer* δ<sub>P</sub>: -1.15 (OP(O)(OEt)<sub>2</sub>).

## 2.26 (E)- 4-Oxo-4-(pyrrolidine-1-yl)-2-butenic acid, ethyl ester (SI-18)

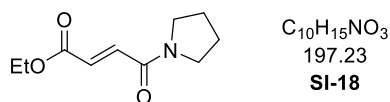

Adapting the procedure of Chen and co-workers,<sup>19</sup> monoethyl fumarate (2.0 g, 13.9 mmol, 1.0 eq) was dispersed in anhydrous toluene (30 mL) under an inert atmosphere. SOCl<sub>2</sub> (2.02 mL, 27.7 mmol, 2.0 eq) was added and the reaction mixture heated at reflux for 3 h. After cooling to rt, the solvent was removed under reduced pressure and the crude mixture dissolved in anhydrous THF (15 mL). Pyrrolidine (2.8 mL, 34.7 mmol, 2.5 eq) was added at 0 °C and the reaction stirred for 1 h at rt. The mixture was diluted with H<sub>2</sub>O (10 mL) and acidified with 1 M HCl to pH 3. The aqueous mixture was extracted with CH<sub>2</sub>Cl<sub>2</sub> (3 × 10 mL) and the combined organic phases washed with 1 M HCl (15 mL), sat. aq. NaHCO<sub>3</sub> (15 mL) and brine (15 mL), dried over MgSO<sub>4</sub>, filtered and the solvent removed under reduced pressure. The crude product was purified by silica column chromatography (*n*-hexane : EtOAc 2:1 to 1:1, *R*<sub>f</sub> 0.2 in *n*-hexane : EtOAc 1:1) to afford the title compound as a pale orange oil (2.06 g, 77%).

**<sup>1</sup>H NMR** (400 MHz, MeOD-*d*<sub>4</sub>)  $\delta_{\text{H}}$ : 1.33 (3H, t, *J* 7.1, OCH<sub>2</sub>CH<sub>3</sub>), 1.90 – 2.00 (2H, m, CH<sub>2</sub>(pyrr)), 2.00 – 2.09 (2H, m, CH<sub>2</sub>(pyrr)), 3.53 (2H, t, *J* 6.9, NCH<sub>2</sub>(pyrr)), 3.68 (2H, t, *J* 6.8, NCH<sub>2</sub>(pyrr)), 4.27 (2H, q, *J* 7.1, OCH<sub>2</sub>CH<sub>3</sub>), 6.74 (1H, d, *J* 15.4, C(2)*H*), 7.34 (1H, d, *J* 15.4, C(3)*H*).

Data in accordance with literature.<sup>6</sup>

## 2.27 (E)-4-Oxo-4-(1-pyrrolidinyl)-2-butenic acid (SI-19)

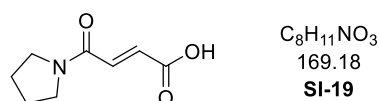

Following General Procedure 1.3, ester **SI-18** (1.0 g, 5.0 mmol, 1.0 eq) and LiOH·H<sub>2</sub>O (234 mg, 5.5 mmol, 1.1 eq) in H<sub>2</sub>O : THF 1:1 (6.0 mL) gave the title compound as a yellow solid (848 mg, 98%). **m.p.** 156 – 158 (*dec*).

**<sup>1</sup>H NMR** (400 MHz, DMSO-*d*<sub>6</sub>)  $\delta_{\text{H}}$ : 1.75 – 1.84 (2H, m, CH<sub>2</sub>(pyrr)), 1.85 – 1.94 (2H, m, CH<sub>2</sub>(pyrr)), 3.36 (2H, t, *J* 6.8, NCH<sub>2</sub>(pyrr)), 3.57 (2H, t, *J* 6.8, NCH<sub>2</sub>(pyrr)), 6.52 (1H, d, *J* 15.3, C(2)*H* or C(3)*H*), 7.16 (1H, d, *J* 15.3, C(2)*H* or C(3)*H*).

Data in accordance with literature.<sup>6</sup>

## 2.28 (E)-4-hydroxy-1-(pyrrolidin-1-yl)but-2-en-1-one (SI-20)

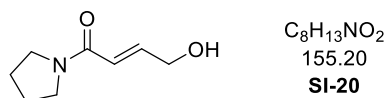

Following General Procedure 1.4, acid **SI-19** (6.8 g, 40.2 mmol, 1.0 eq), Et<sub>3</sub>N (6.1 mL, 44.2 mmol, 1.1 eq) and ethyl chloroformate (4.2 mL, 44.2 mmol, 1.1 eq) in anhydrous THF (100 mL) followed by NaBH<sub>4</sub> (3.8 g, 100.4 mmol, 2.5 eq) in H<sub>2</sub>O (60 mL) gave the title compound after purification by silica column chromatography (CH<sub>2</sub>Cl<sub>2</sub> : Acetone 1:1 to 3:7, *R*<sub>f</sub> 0.22 in CH<sub>2</sub>Cl<sub>2</sub> : Acetone 3:7) followed by recrystallisation from toluene as colourless solid (908 mg, 15%). **m.p.** (toluene) 86-88 °C.

**<sup>1</sup>H NMR** (500 MHz, CDCl<sub>3</sub>)  $\delta_{\text{H}}$ : 1.86 (2H, p, *J* 6.8, CH<sub>2</sub>(pyrr)), 1.95 (2H, p, *J* 6.8, CH<sub>2</sub>(pyrr)), 2.93 (1H, br s, OH), 3.48 – 3.55 (4H, m, 2 × NCH<sub>2</sub>(pyrr)), 4.29 – 4.36 (2H, m, C(4)*H*<sub>2</sub>), 6.39 (1H, dt, *J* 15.2, 2.0, C(2)*H*), 6.96 (1H, dt, *J* 15.2, 3.9, C(3)*H*).

**<sup>13</sup>C{<sup>1</sup>H} NMR** (126 MHz, CDCl<sub>3</sub>)  $\delta_{\text{C}}$ : 24.4 (CH<sub>2</sub>(pyrr)), 26.1 (CH<sub>2</sub>(pyrr)), 46.0 (NCH<sub>2</sub>(pyrr)), 46.7 (NCH<sub>2</sub>(pyrr)), 62.1 (C(4)*H*<sub>2</sub>), 120.2 (C(2)*H*), 144.1 (C(3)*H*), 164.8 (C=O).

**HRMS** (NSI<sup>+</sup>) C<sub>8</sub>H<sub>14</sub>NO<sub>2</sub> [M+H]<sup>+</sup> found 156.1016, requires 156.1019 (−2.0 ppm).

$\nu_{\max}$  (film,  $\text{cm}^{-1}$ ) 3302 (O-H), 2872 (C-H), 1662 (C=O), 1591 (C=C).

## 2.29 (E)-(4-Oxo-4-(pyrrolidin-1-yl)but-2-en-1-yl) phosphoric acid, diethyl ester (35)

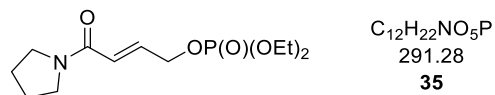

Following General Procedure 1.1, alcohol **SI-20** (770 mg, 4.96 mmol, 1.0 eq), diethyl chlorophosphate (1.0 mL, 7.44 mmol, 1.5 eq),  $\text{Et}_3\text{N}$  (1.0 mL, 7.44 mmol, 1.5 eq) and DMAP (151 mg, 1.24 mmol, 0.25 eq) in anhydrous  $\text{CH}_2\text{Cl}_2$  (50 mL) gave the title compound after purification by silica column chromatography ( $\text{CH}_2\text{Cl}_2$  : 2.5% MeOH,  $R_f$  0.43 in  $\text{CH}_2\text{Cl}_2$  : MeOH 9:1) as pale pink oil (1.3 g, 91 %).

$^1\text{H}$  NMR (500 MHz,  $\text{CDCl}_3$ )  $\delta_{\text{H}}$ : 1.30 (6H, t,  $J$  7.1,  $\text{P}(\text{OCH}_2\text{CH}_3)_2$ ), 1.84 (2H, p,  $J$  6.7,  $\text{CH}_{2(\text{pyrr})}$ ), 1.93 (2H, p,  $J$  6.7,  $\text{CH}_{2(\text{pyrr})}$ ), 3.49 (4H, td,  $J$  6.8, 3.8,  $\text{NCH}_{2(\text{pyrr})}$ ), 4.09 (4H, app. p,  $J$  7.2,  $\text{P}(\text{OCH}_2\text{CH}_3)_2$ ), 4.66 (2H, ddd,  $J$  7.0, 4.3, 1.9,  $\text{C}(1)\text{H}_2$ ), 6.39 (1H, dt,  $J$  15.1, 1.9,  $\text{C}(3)\text{H}$ ), 6.84 (1H, dtd,  $J$  15.1, 4.3, 1.7,  $\text{C}(2)\text{H}$ ).

$^{13}\text{C}\{^1\text{H}\}$  NMR (126 MHz,  $\text{CDCl}_3$ )  $\delta_{\text{C}}$ : 16.1 (d,  $^3J_{\text{CP}}$  6.7,  $\text{P}(\text{OCH}_2\text{CH}_3)_2$ ), 24.3 ( $\text{CH}_{2(\text{pyrr})}$ ), 26.1 ( $\text{CH}_{2(\text{pyrr})}$ ), 45.9 ( $\text{NCH}_{2(\text{pyrr})}$ ), 46.6 ( $\text{NCH}_{2(\text{pyrr})}$ ), 64.0 (d,  $^2J_{\text{CP}}$  5.8,  $\text{P}(\text{OCH}_2\text{CH}_3)_2$ ), 66.0 (d,  $^2J_{\text{CP}}$  5.1,  $\text{C}(1)\text{H}_2$ ), 122.4 ( $\text{C}(3)\text{H}$ ), 137.8 (d,  $^2J_{\text{CP}}$  7.5,  $\text{C}(2)\text{H}$ ), 163.7 ( $\text{C}(4)=\text{O}$ ).

$^{31}\text{P}\{^1\text{H}\}$  NMR (202 MHz,  $\text{CDCl}_3$ )  $\delta_{\text{P}}$ : -1.12 ( $\text{OP}(\text{O})(\text{OEt})_2$ ).

HRMS ( $\text{ESI}^+$ )  $\text{C}_{12}\text{H}_{22}\text{NO}_5\text{PNa}$   $[\text{M}+\text{Na}]^+$  found 314.1120, requires 314.1128 (-2.5 ppm).

$\nu_{\max}$  (film,  $\text{cm}^{-1}$ ) 2978 (C-H), 2873 (C-H), 1670 (C=O), 1616 (C=C), 1265 (P=O), 1020 (P-O).

## 2.30 (E)-4-(4-Morpholinyl)-4-oxo-2-butenic acid, ethyl ester (SI-21)

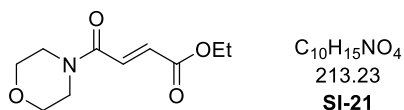

Following General Procedure 1.2, monoethyl fumarate (7.5 g, 52.0 mmol, 1.0 eq), morpholine (5.0 mL, 57.2 mmol, 1.1 eq), EDCI·HCl (10.9 g, 57.2 mmol, 1.1 eq) and DMAP (636 mg, 5.2 mmol, 0.1 eq) in  $\text{CH}_2\text{Cl}_2$  (130 mL) gave the title compound as off-white solid (10.6 g, 95 %), which was used without further purification.

$^1\text{H}$  NMR (400 MHz,  $\text{CDCl}_3$ )  $\delta_{\text{H}}$ : 1.31 (3H, t,  $J$  7.1,  $\text{OCH}_2\text{CH}_3$ ), 3.56 – 3.60 (2H, m,  $\text{CH}_{2(\text{morph})}$ ), 3.67 – 3.73 (6H, m,  $3 \times \text{CH}_{2(\text{morph})}$ ), 4.25 (2H, q,  $J$  7.1,  $\text{OCH}_2\text{CH}_3$ ), 6.78 (1H, d,  $J$  15.3,  $\text{CH}$ ), 7.35 (1H, d,  $J$  15.3,  $\text{CH}$ ).



### 2.31 (E)-4-(4-Morpholinyl)-4-oxo-2-butenic acid (SI-22)

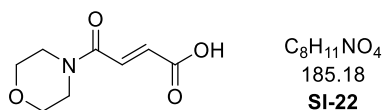

Following General Procedure 1.3, ester **SI-21** (9.8 g, 46.3 mmol, 1.0 eq) and LiOH·H<sub>2</sub>O (2.1 g, 50.9 mmol, 1.1 eq) in H<sub>2</sub>O : THF 1:1 (50 mL) gave the title compound as off-white solid (5.75 g, 67%), which was used without further purification.

<sup>1</sup>H NMR (400 MHz, MeOH-d<sub>4</sub>) δ<sub>H</sub>: 3.62 – 3.72 (8H, m, 4 × CH<sub>2(morph)</sub>), 6.65 (1H, d, *J* 15.4, CH), 7.45 (1H, d, *J* 15.4, CH).

### 2.32 (E)-4-Hydroxy-N-morpholinyl-2-butenamide (SI-23)

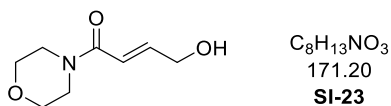

Following General Procedure 1.4, acid **SI-22** (5.4 g, 29.5 mmol, 1.0 eq), Et<sub>3</sub>N (4.5 mL, 32.4 mmol, 1.1 eq) and ethyl chloroformate (3.1 mL, 32.4 mmol, 1.1 eq) in anhydrous THF (74 mL) followed by NaBH<sub>4</sub> (2.8 g, 73.7 mmol, 2.5 eq) in H<sub>2</sub>O (46 mL) gave the title compound after purification by silica column chromatography (EtOAc : iPrOH 95:5 to 85:15, R<sub>f</sub> 0.26 in EtOAc : iPrOH 85:15) followed by recrystallisation from toluene as colourless solid (808 mg, 16%). **m.p.** (toluene) 100-102 °C.

<sup>1</sup>H NMR (500 MHz, CDCl<sub>3</sub>) δ<sub>H</sub>: 3.55 – 3.60 (2H, m, NCH<sub>2(morph)</sub>), 3.64 – 3.71 (6H, m, 2 × OCH<sub>2(morph)</sub>, NCH<sub>2(morph)</sub>), 4.34 (2H, dd, *J* 3.7, 2.2, C(4)H<sub>2</sub>), 6.52 (1H, dt, *J* 15.1, 2.1, C(2)H), 6.94 (1H, dt, *J* 15.2, 3.8, C(3)H).

<sup>13</sup>C{<sup>1</sup>H} NMR (126 MHz, CDCl<sub>3</sub>) δ<sub>C</sub>: 42.3 (NCH<sub>2(morph)</sub>), 46.2 (NCH<sub>2(morph)</sub>), 62.0 (C(4)H<sub>2</sub>), 66.7 (OCH<sub>2(morph)</sub>), 66.8 (OCH<sub>2(morph)</sub>), 118.1 (C(2)H), 145.0 (C(3)H), 165.6 (C=O).

**HRMS** (NSI<sup>-</sup>) C<sub>8</sub>H<sub>12</sub>NO<sub>3</sub> [M-H]<sup>-</sup> found 170.0827, requires 170.0823 (+2.5 ppm).

**ν<sub>max</sub>** (film, cm<sup>-1</sup>) 3412 (O-H), 2872 (C-H), 1666 (C=O), 1604 (C=C).

### 2.33 (E)-(4-Morpholino-4-oxobut-2-en-1-yl) phosphoric acid, diethyl ester (36)

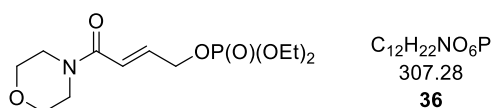

Following General Procedure 1.1, alcohol **SI-23** (417 mg, 2.43 mmol, 1.0 eq), diethyl chlorophosphate (0.53 mL, 3.64 mmol, 1.5 eq), Et<sub>3</sub>N (0.51 mL, 3.64 mmol, 1.5 eq) and DMAP (74 mg, 0.6 mmol, 0.25 eq) in anhydrous CH<sub>2</sub>Cl<sub>2</sub> (25 mL) gave the title compound after purification by silica column chromatography (CH<sub>2</sub>Cl<sub>2</sub> : 2.5% MeOH, R<sub>f</sub> 0.55 in CH<sub>2</sub>Cl<sub>2</sub> : MeOH 9:1) as pale yellow oil (673 mg, 94 %).

<sup>1</sup>H NMR (500 MHz, CDCl<sub>3</sub>) δ<sub>H</sub>: 1.30 (6H, td, *J* 7.1, 0.9, P(OCH<sub>2</sub>CH<sub>3</sub>)<sub>2</sub>), 3.49 – 3.55 (2H, m, NCH<sub>2</sub>(morph)), 3.60 – 3.68 (6H, m, NCH<sub>2</sub>(morph), 2 × OCH<sub>2</sub>(morph)), 4.10 (4H, app. p, P(OCH<sub>2</sub>CH<sub>3</sub>)<sub>2</sub>), 4.66 (2H, ddd, *J* 7.5, 4.2, 2.0, C(1)H<sub>2</sub>), 6.51 (1H, dt, *J* 15.1, 2.0, C(3)H), 6.82 (1H, dtd, *J* 15.1, 4.2, 1.8, C(2)H).

<sup>13</sup>C{<sup>1</sup>H} NMR (126 MHz, CDCl<sub>3</sub>) δ<sub>C</sub>: 16.1 (d, <sup>3</sup>*J*<sub>CP</sub> 6.6, P(OCH<sub>2</sub>CH<sub>3</sub>)<sub>2</sub>), 42.3 (NCH<sub>2</sub>(morph)), 46.2 (NCH<sub>2</sub>(morph)), 64.0 (d, <sup>2</sup>*J*<sub>CP</sub> 5.8, P(OCH<sub>2</sub>CH<sub>3</sub>)<sub>2</sub>), 66.0 (d, <sup>2</sup>*J*<sub>CP</sub> 5.2, C(1)H<sub>2</sub>), 66.8 (2 × OCH<sub>2</sub>(morph)), 120.4 (C(3)H), 139.1 (d, <sup>3</sup>*J*<sub>CP</sub> 7.3, C(2)H), 164.6 (C=O).

<sup>31</sup>P{<sup>1</sup>H} NMR (202 MHz, CDCl<sub>3</sub>) δ<sub>P</sub>: -1.11 (OP(O)(OEt)<sub>2</sub>).

HRMS (ESI<sup>+</sup>) C<sub>12</sub>H<sub>22</sub>NO<sub>6</sub>PNa [M+Na]<sup>+</sup> found 330.1068, requires 330.1077 (−2.7 ppm).

ν<sub>max</sub> (film, cm<sup>−1</sup>) 2983 (C-H), 1668 (C=O), 1620 (C=C), 1265 (P=O), 1018 (P-O).

## 3. Tandem Pd/ITU Relay Catalysis Products

### 3.1 (2*R*,3*S*)-2-(Dimethylamino)-3-vinylbutanedioic acid, 4-ethyl 1-(4-nitrophenyl) ester (**18<sub>maj</sub>**) and (2*R*,3*R*)-2-(Dimethylamino)-3-vinylbutanedioic acid, 4-ethyl 1-(4-nitrophenyl) ester (**18<sub>min</sub>**)

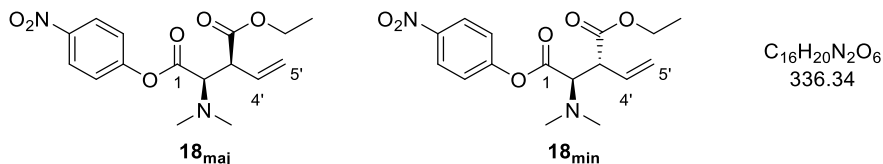

Following General Procedure 1.5, PNP ester **13** (65.0 mg, 0.25 mmol, 1.0 eq), FurCat **3** (9.3 mg, 12.5 μmol, 5 mol%), (*S*)-TM·HCl (12.0 mg, 0.05 mmol, 10 mol%), phosphate **14** (83.0 mg, 0.31 mmol, 1.25 eq) and *i*Pr<sub>2</sub>NEt (0.1 mL, 0.6 mmol, 2.4 eq) in MeCN (4.4 mL) gave the title compound after purification by silica column chromatography (Petrol : EtOAc 6:1 to 4:1, R<sub>f</sub>

0.23 in Petrol : EtOAc 6:1) as a yellow oil (60.0 mg, 71%) as an inseparable mixture of diastereomers (60:40 dr).  $[\alpha]_D^{20}$  -0.5 (c 0.45 in CHCl<sub>3</sub>).

**HRMS** (NSI<sup>+</sup>) C<sub>16</sub>H<sub>21</sub>N<sub>2</sub>O<sub>6</sub> [M+H]<sup>+</sup> found 337.1386, requires 337.1394 (-2.4 ppm).

$\nu_{\max}$  (film, cm<sup>-1</sup>) 3084 (C-H), 2981 (C-H), 1732 (C=O), 1716 (C=O), 1591 (C=C<sub>Ar</sub>), 1523 (N=O), 1489 (C=C<sub>Ar</sub>), 1344 (N=O).

*Data for major diastereoisomer*

**Chiral HPLC** analysis, Chiralcel OD-H, (*n*-hexane : *i*PrOH 99:1, flow rate 0.5 mLmin<sup>-1</sup>, 254 nm, 30 °C) *t<sub>R</sub>* (2*S*,3*R*): 26.7 min, *t<sub>R</sub>* (2*R*,3*S*): 29.5 min, 10:90 er.

**<sup>1</sup>H NMR** (300 MHz, CDCl<sub>3</sub>)  $\delta_H$ : 1.28 (3H, t, *J* 7.1, OCH<sub>2</sub>CH<sub>3</sub>), 2.47 (6H, s, N(CH<sub>3</sub>)<sub>2</sub>), 3.64 – 3.70 (1H, m, C(3)*H*), 3.85 (1H, d, *J* 11.4, C(2)*H*), 4.12 – 4.20 (2H, m, OCH<sub>2</sub>CH<sub>3</sub>), 5.28 – 5.40 (2H, m, C(5')H<sub>2</sub>), 5.89 (1H, ddd, *J* 17.1, 10.1, 8.9, C(4')*H*), 7.21 – 7.26 (2H, m, Ar(2,6)*H*), 8.23 – 8.30 (2H, m, Ar(3,5)*H*).

**<sup>13</sup>C{<sup>1</sup>H} NMR** (126 MHz, CDCl<sub>3</sub>)  $\delta_C$ : 14.1 (OCH<sub>2</sub>CH<sub>3</sub>), 41.8 (N(CH<sub>3</sub>)<sub>2</sub>), 51.3 (C(3)*H*), 61.0 (OCH<sub>2</sub>CH<sub>3</sub>), 69.2 (C(2)*H*), 120.9 (C(5')H<sub>2</sub>), 122.6 (ArC(2,6)*H*), 125.3 (ArC(3,5)*H*), 131.8 (C(4')*H*), 145.5 (ArC(1)), 154.9 (ArC(4)), 166.7 (C(1)=O), 171.0 (C(4)=O).

*Data for minor diastereoisomer*

**Chiral HPLC** analysis, Chiralcel OD-H, (*n*-hexane : *i*PrOH 99:1, flow rate 0.5 mLmin<sup>-1</sup>, 254 nm, 30 °C) *t<sub>R</sub>* (2*R*,3*R*): 25.0 min, *t<sub>R</sub>* (2*S*,3*S*): 41.7 min, 70:30 er.

**<sup>1</sup>H NMR** (300 MHz, CDCl<sub>3</sub>)  $\delta_H$ : 1.23 (3H, t, *J* 7.1, OCH<sub>2</sub>CH<sub>3</sub>), 2.46 (6H, s, N(CH<sub>3</sub>)<sub>2</sub>), 3.60 – 3.68 (1H, m, C(3)*H*), 3.88 (1H, d, *J* 11.4, C(2)*H*), 4.16 – 4.26 (2H, m, OCH<sub>2</sub>CH<sub>3</sub>), 5.25 – 5.34 (2H, m, C(5')H<sub>2</sub>), 5.84 (1H, ddd, *J* 17.3, 10.0, 8.3, C(4')*H*), 7.27 – 7.32 (2H, m, Ar(2,6)*H*), 8.23 – 8.30 (2H, m, Ar(3,5)*H*).

**<sup>13</sup>C{<sup>1</sup>H} NMR** (126 MHz, CDCl<sub>3</sub>)  $\delta_C$ : 14.1 (OCH<sub>2</sub>CH<sub>3</sub>), 41.7 (N(CH<sub>3</sub>)<sub>2</sub>), 49.6 (C(3)*H*), 61.3 (OCH<sub>2</sub>CH<sub>3</sub>), 67.8 (C(2)*H*), 119.4 (C(5')H<sub>2</sub>), 122.6 (ArC(2,6)*H*), 125.3 (ArC(3,5)*H*), 132.5 (C(4')*H*), 145.5 (ArC(1)), 155.1 (ArC(4)), 168.0 (C(1)=O), 172.0 (C(4)=O).

**3.2 (2*R*,3*S*)-3-(((*tert*-Butyldiphenylsilyl)oxy)methyl)-2-(dimethylamino)pent-4-enoic acid, 4-nitrophenyl ester (**20<sub>maj</sub>**) and (2*R*,3*R*)-3-(((*tert*-butyldiphenylsilyl)oxy)methyl)-2-(dimethylamino)pent-4-enoic acid, 4-nitrophenyl ester (**20<sub>min</sub>**)**

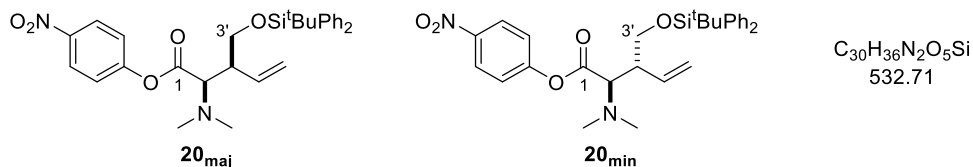

Following General Procedure 1.5, PNP ester **13** (65.0 mg, 0.25 mmol, 1.0 eq), FurCat **3** (9.3 mg, 12.5  $\mu\text{mol}$ , 5 mol%), ( $\pm$ )-TM $\cdot$ HCl (12.0 mg, 0.05 mmol, 10 mol%), phosphate **16** (143 mg, 0.31 mmol, 1.25 eq) and *i*Pr<sub>2</sub>NEt (0.1 mL, 0.6 mmol, 2.4 eq) in MeCN (4.4 mL) gave crude product **20** (55:45 dr), which was purified by flash silica chromatography (Petrol : EtOAc 6:1 to 4:1) to give:

*Major diastereoisomer* **20<sub>maj</sub>** (*R<sub>f</sub>* 0.42 in Petrol : EtOAc 4:1, 24 mg, 18%) as a colourless solid.

**<sup>1</sup>H NMR** (500 MHz, CDCl<sub>3</sub>)  $\delta_{\text{H}}$ : 1.05 (9H, s, C(CH<sub>3</sub>)<sub>3</sub>), 2.45 (6H, s, N(CH<sub>3</sub>)<sub>2</sub>), 2.82 (1H, ddd, *J* 14.3, 8.8, 4.0, C(3)*H*), 3.69 – 3.81 (2H, m, CH<sub>2</sub>-OSi), 3.82 (1H, d, *J* 10.9, C(2)*H*), 5.16 – 5.28 (2H, m, C(5)*H*<sub>2</sub>), 5.99 (1H, dt, *J* 17.2, 9.8, C(4)*H*), 6.99 – 7.05 (2H, m, Ar(2,6)*H*), 7.30 – 7.46 (6H, m, 2  $\times$  Ph(2,4,6)*H*), 7.59 – 7.66 (4H, m, 2  $\times$  Ph(3,5)*H*), 8.15 – 8.21 (2H, m, Ar(3,5)*H*).

**<sup>13</sup>C{<sup>1</sup>H} NMR** (126 MHz, CDCl<sub>3</sub>)  $\delta_{\text{C}}$ : 19.3 (C(CH<sub>3</sub>)<sub>3</sub>), 26.8 (C(CH<sub>3</sub>)<sub>3</sub>), 41.5 (N(CH<sub>3</sub>)<sub>2</sub>), 46.3 (C(3)*H*), 65.6 (CH<sub>2</sub>-OSi), 67.5 (C(2)*H*), 117.2 (C(5)*H*<sub>2</sub>), 122.6 (ArC(2,6)*H*), 125.1 (ArC(3,5)*H*), 127.7 (2  $\times$  PhC(2,6)*H*), 129.8 (2  $\times$  PhC(4)*H*), 133.2 (PhC(1)), 135.6 (2  $\times$  PhC(3,5)*H*), 136.9 (C(4)*H*), 145.2 (ArC(1)), 155.0 (ArC(4)), 168.1 (C=O).

*Minor diastereoisomer* **20<sub>min</sub>** (*R<sub>f</sub>* 0.59 in Petrol : EtOAc 4:1, 23 mg, 17%) as an off-white solid.

**<sup>1</sup>H NMR** (400 MHz, CDCl<sub>3</sub>)  $\delta_{\text{H}}$ : 1.09 (9H, s, C(CH<sub>3</sub>)<sub>3</sub>), 2.43 (6H, s, N(CH<sub>3</sub>)<sub>2</sub>), 2.72 – 2.80 (1H, m, C(3)*H*), 3.72 – 3.79 (2H, m, C(2)*H*, CH<sup>A</sup>H<sup>B</sup>-OSi), 4.00 (1H, dd, *J* 9.7, 4.6, CH<sup>A</sup>H<sup>B</sup>-OSi), 5.24 – 5.32 (2H, m, C(5)*H*<sub>2</sub>), 6.09 (1H, ddd, *J* 16.7, 10.8, 9.0, C(4)*H*), 7.23 – 7.27 (2H, m, Ar(2,6)*H*), 7.38 – 7.47 (6H, m, 2  $\times$  Ph(2,4,6)*H*), 7.70 – 7.79 (3H, m, 2  $\times$  Ph(3,5)*H*), 8.26 – 8.31 (2H, m, Ar(3,5)*H*).

**<sup>13</sup>C{<sup>1</sup>H} NMR** (126 MHz, CDCl<sub>3</sub>)  $\delta_{\text{C}}$ : 19.3 (C(CH<sub>3</sub>)<sub>3</sub>), 26.8 (C(CH<sub>3</sub>)<sub>3</sub>), 41.4 (N(CH<sub>3</sub>)<sub>2</sub>), 45.4 (C(3)*H*), 63.2 (CH<sub>2</sub>-OSi), 67.0 (C(2)*H*), 118.7 (C(5)*H*<sub>2</sub>), 122.7 (ArC(2,6)*H*), 125.2 (ArC(3,5)*H*), 127.6 (2  $\times$  PhC(2,6)*H*), 129.6 (2  $\times$  PhC(4)*H*), 133.0 (PhC(1)), 135.6 (2  $\times$  PhC(3,5)*H*), 136.4 (C(4)*H*), 145.3 (ArC(1)), 155.2 (ArC(4)), 168.5 (C=O).

**3.3 (2*R*,3*S*)-2-(Dimethylamino)-3-(methoxy(methyl)carbamoyl)pent-4-enoic acid, 4-nitrophenyl ester (**27<sub>maj</sub>**) and (2*R*,3*R*)-2-(Dimethylamino)-3-(methoxy(methyl)carbamoyl)pent-4-enoic acid, 4-nitrophenyl ester (**27<sub>min</sub>**)**

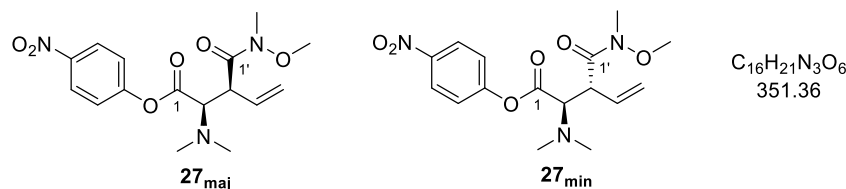

Following General Procedure 1.5, PNP ester **13** (65.0 mg, 0.25 mmol, 1.0 eq), Pd<sub>2</sub>dba<sub>3</sub>·CHCl<sub>3</sub> (6.5 mg, 6.25 μmol, 2.5 mol%), P(2-furyl)<sub>3</sub> (5.8 mg, 25 μmol, 10 mol%), (*S*)-TM·HCl (12.0 mg, 0.05 mmol, 20 mol%), phosphate **26** (77.4 mg, 0.27 mmol, 1.1 eq) and *i*Pr<sub>2</sub>NEt (0.1 mL, 0.6 mmol, 2.4 eq) in MeCN (4.4 mL) gave the crude product (60:40 dr), which was purified by silica column chromatography (CH<sub>2</sub>Cl<sub>2</sub> : Et<sub>2</sub>O 15:1 to 4:1) to give:

*Major diastereoisomer 27<sub>maj</sub>* (*R<sub>f</sub>* 0.37 in CH<sub>2</sub>Cl<sub>2</sub> : Et<sub>2</sub>O 4:1) as pale yellow glass (30 mg, 34%).

$[\alpha]_D^{20} + 0.2$  (*c* 0.5 in CHCl<sub>3</sub>); **Chiral HPLC** analysis, Chiralcel OD-H, (*n*-hexane : *i*PrOH 95:5, flow rate 1.0 mLmin<sup>-1</sup>, 211 nm, 40 °C) *t<sub>R</sub>* (2*R*,3*S*) 19.5 min, *t<sub>R</sub>* (2*S*,3*R*) 14.7 min, 91:9 er.

**<sup>1</sup>H NMR** (500 MHz, CDCl<sub>3</sub>) δ<sub>H</sub>: 2.47 (6H, s, N(CH<sub>3</sub>)<sub>2</sub>), 3.25 (3H, s, C(O)NCH<sub>3</sub>), 3.75 (3H, s, OCH<sub>3</sub>), 4.01 – 4.07 (m, 1H, C(2)*H*), 4.17 – 4.30 (1H, m, C(3)*H*), 5.30 (1H, d, *J* 10.2, C(5)*H<sup>A</sup>H<sup>B</sup>*), 5.36 (1H, d, *J* 17.2, C(5)*H<sup>A</sup>H<sup>B</sup>*), 5.87 – 5.96 (1H, m, C(4)*H*), 7.23 – 7.26 (2H, m, Ar(2,6)*H*), 8.24 – 8.29 (2H, m, Ar(3,5)*H*).

**<sup>13</sup>C{<sup>1</sup>H} NMR** (126 MHz, CDCl<sub>3</sub>) δ<sub>C</sub>: 32.4 (C(O)NCH<sub>3</sub>), 42.2 (N(CH<sub>3</sub>)<sub>2</sub>), 46.1 (C(3)*H*), 61.9 (OCH<sub>3</sub>), 69.0 (C(2)*H*), 120.7 (C(5)*H<sub>2</sub>*), 122.8 (ArC(2,6)*H*), 125.3 (ArC(3,5)*H*), 133.3 (C(4)*H*), 145.5 (ArC(1)), 155.1 (ArC(4)), 167.5 (C(1)=O), 171.6 (C(1')=O).

**HRMS** (NSI<sup>+</sup>)C<sub>16</sub>H<sub>22</sub>N<sub>3</sub>O<sub>6</sub> [M+H]<sup>+</sup> found 352.1506, requires 352.1503 (+0.8 ppm).

**ν<sub>max</sub>** (CDCl<sub>3</sub>, cm<sup>-1</sup>) 2941 (C-H), 1755 (C=O), 1654 (C=O), 1593 (C=C<sub>Ar</sub>), 1525 (N=O), 1489 (C=C<sub>Ar</sub>), 1346 (N=O).

*Minor diastereoisomer 27<sub>min</sub>* (*R<sub>f</sub>* 0.61 in CH<sub>2</sub>Cl<sub>2</sub> : Et<sub>2</sub>O 4:1) as pale yellow glass (20 mg, 23%).

$[\alpha]_D^{20} +15.8$  (*c* 0.25 in CHCl<sub>3</sub>); **Chiral HPLC** analysis, Chiralcel OD-H, (*n*-hexane : *i*PrOH 95:5, flow rate 1.0 mLmin<sup>-1</sup>, 211 nm, 40 °C) *t<sub>R</sub>* (2*R*,3*R*): 10.1 min, *t<sub>R</sub>* (2*S*,3*S*): 13.3 min, 83:17 er.

**<sup>1</sup>H NMR** (500 MHz, CDCl<sub>3</sub>) δ<sub>H</sub>: 2.50 (6H, s, N(CH<sub>3</sub>)<sub>2</sub>), 3.18 (3H, s, C(O)NCH<sub>3</sub>), 3.75 (3H, s, OCH<sub>3</sub>), 3.99 – 4.04 (1H, m, C(2)*H*), 4.04 – 4.12 (1H, m, C(3)*H*), 5.24 – 5.34 (2H, m, C(5)*H<sub>2</sub>*), 5.83 – 5.93 (1H, m, C(4)*H*), 7.26 – 7.31 (2H, m, Ar(2,6)*H*), 8.23 – 8.28 (2H, m, Ar(3,5)*H*).

$^{13}\text{C}\{^1\text{H}\}$  NMR (126 MHz,  $\text{CDCl}_3$ )  $\delta_{\text{C}}$ : 32.3 ( $\text{C}(\text{O})\text{NCH}_3$ ), 42.1 ( $\text{N}(\text{CH}_3)_2$ ), 45.8 ( $\text{C}(3)\text{H}$ ), 61.3 ( $\text{OCH}_3$ ), 68.3 ( $\text{C}(2)\text{H}$ ), 118.9 ( $\text{C}(5)\text{H}_2$ ), 122.8 ( $\text{ArC}(2,6)\text{H}$ ), 125.3 ( $\text{ArC}(3,5)\text{H}$ ), 133.5 ( $\text{C}(4)\text{H}$ ), 145.5 ( $\text{ArC}(1)$ ), 155.3 ( $\text{ArC}(4)$ ), 168.8 ( $\text{C}(1)=\text{O}$ ), 172.3 ( $\text{C}(1')=\text{O}$ ).

**HRMS** ( $\text{NSI}^+$ )  $\text{C}_{16}\text{H}_{22}\text{N}_3\text{O}_6$   $[\text{M}+\text{H}]^+$  found 352.1505, requires 352.1503 (+0.5 ppm).

$\nu_{\text{max}}$  ( $\text{CHCl}_3$ ,  $\text{cm}^{-1}$ ) 2941 (C-H), 1749 (C=O), 1651 (C=O), 1593 (C=C<sub>Ar</sub>), 1525 (N=O), 1489 (C=C<sub>Ar</sub>), 1346 (N=O).

### 3.4 (S)-2-((R)-1-(dimethylamino)-2-oxo-2-(pyrrolidin-1-yl)ethyl)-N-methoxy-N-methylbut-3-enamide (**28<sub>maj</sub>**)

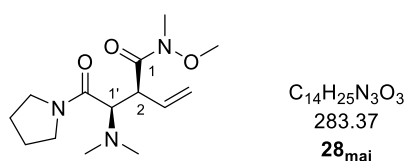

A solution of PNP ester **27<sub>maj</sub>** (57.0 mg, 0.17 mmol, 1.0 eq) and pyrrolidine (43  $\mu\text{L}$ , 0.51 mmol, 3.0 eq) in  $\text{CH}_2\text{Cl}_2$  (3.5 mL) was stirred at room temperature overnight. The reaction was quenched by the addition of 1 M NaOH (3 mL), the phases separated and the aqueous phase extracted with  $\text{CH}_2\text{Cl}_2$  (3  $\times$  3 mL). The combined organic phases were washed with 1 M NaOH (2  $\times$  5 mL), water (5 mL) and brine (5 mL), dried over  $\text{MgSO}_4$ , filtered and the solvent removed under reduced pressure. The crude product was purified by silica column chromatography ( $\text{CH}_2\text{Cl}_2$  : 2% MeOH to  $\text{CH}_2\text{Cl}_2$  : 4% MeOH,  $R_f$  0.47 in  $\text{CH}_2\text{Cl}_2$  : MeOH 9:1) to yield the title compound **28<sub>maj</sub>** as white solid (13 mg, 27%). **m.p.** ( $\text{CH}_2\text{Cl}_2$ ) 115 – 118  $^\circ\text{C}$ .

$[\alpha]_{\text{D}}^{20}$  -7.0 ( $c$  0.3 in  $\text{CHCl}_3$ ); **Chiral HPLC** analysis, Chiralpak ID, ( $n$ -hexane :  $i\text{PrOH}$  88:12, flow rate 1.5  $\text{mLmin}^{-1}$ , 211 nm, 40  $^\circ\text{C}$ )  $t_{\text{R}}$  (2*S*,1'*R*): 20.0 min,  $t_{\text{R}}$  (2*R*,1'*S*) 13.9 min, 90:10 er.

$^1\text{H}$  NMR (500 MHz,  $\text{CDCl}_3$ )  $\delta_{\text{H}}$ : 1.76 - 1.86 (2H, m,  $\text{CH}_2(\text{pyrr})$ ), 1.86 - 1.97 (2H, m,  $\text{CH}_2(\text{pyrr})$ ), 2.37 (6H, s,  $\text{N}(\text{CH}_3)_2$ ), 3.22 (3H, s,  $\text{C}(\text{O})\text{NCH}_3$ ), 3.45 (2H, td,  $J$  7.0, 2.7,  $\text{NCH}_2(\text{pyrr})$ ), 3.52 (2H, td,  $J$  6.8, 1.8,  $\text{NCH}_2(\text{pyrr})$ ), 3.71 (3H, s,  $\text{OCH}_3$ ), 3.96 (1H, d,  $J$  10.9,  $\text{C}(1')\text{H}$ ), 4.18 - 4.32 (1H, m,  $\text{C}(2)\text{H}$ ), 5.12 (1H, dd,  $J$  10.3, 1.1,  $\text{C}(4)\text{H}^{\text{A}}\text{H}^{\text{B}}$ ), 5.22 - 5.29 (1H, m,  $\text{C}(4)\text{H}^{\text{A}}\text{H}^{\text{B}}$ ), 5.70 - 5.80 (1H, m,  $\text{C}(3)\text{H}$ ).

$^{13}\text{C}\{^1\text{H}\}$  NMR (126 MHz,  $\text{CDCl}_3$ )  $\delta_{\text{C}}$ : 24.4 ( $\text{CH}_2(\text{pyrr})$ ), 26.3 ( $\text{CH}_2(\text{pyrr})$ ), 32.4 ( $\text{C}(\text{O})\text{NCH}_3$ ), 42.2 ( $\text{N}(\text{CH}_3)_2$ ), 45.2 ( $\text{NCH}_2(\text{pyrr})$ ), 45.6 ( $\text{C}(2)\text{H}$ ), 47.1 ( $\text{NCH}_2(\text{pyrr})$ ), 61.9 ( $\text{OCH}_3$ ), 66.1 ( $\text{C}(1')\text{H}$ ), 119.5 ( $\text{C}(4)\text{H}_2$ ), 133.7 ( $\text{C}(3)\text{H}$ ), 168.1 ( $\text{C}(2')=\text{O}$ ), 173.0 ( $\text{C}(1)=\text{O}$ ).

**HRMS** ( $\text{NSI}^+$ )  $\text{C}_{14}\text{H}_{26}\text{N}_3\text{O}_3$   $[\text{M}+\text{H}]^+$  found 284.1971, requires 284.1969 (+0.8 ppm).

$\nu_{\text{max}}$  ( $\text{CHCl}_3$ ,  $\text{cm}^{-1}$ ) 2972 (C-H), 2875 (C-H), 1625 (C=O).

### 3.5 (R)-2-((R)-1-(dimethylamino)-2-oxo-2-(pyrrolidin-1-yl)ethyl)-N-methoxy-N-methylbut-3-enamide (**28<sub>min</sub>**)

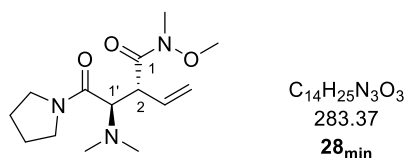

A solution of PNP ester **27<sub>min</sub>** (57.0 mg, 0.17 mmol, 1.0 eq) and pyrrolidine (43  $\mu$ L, 0.51 mmol, 3.0 eq) in CH<sub>2</sub>Cl<sub>2</sub> (3.5 mL) was stirred at room temperature overnight. The reaction was quenched by the addition of 1 M NaOH (3 mL), the phases separated and the aqueous phase extracted with CH<sub>2</sub>Cl<sub>2</sub> (3  $\times$  3 mL). The combined organic phases were washed with 1 M NaOH (2  $\times$  5 mL), water (5 mL) and brine (5 mL), dried over MgSO<sub>4</sub>, filtered and the solvent removed under reduced pressure. The crude product was purified by silica column chromatography (CH<sub>2</sub>Cl<sub>2</sub> : 2% MeOH to CH<sub>2</sub>Cl<sub>2</sub> : 4% MeOH, R<sub>f</sub> 0.55 in CH<sub>2</sub>Cl<sub>2</sub> : MeOH 9:1) to yield the title compound **28<sub>min</sub>** as colourless glass (13 mg, 27%).

[ $\alpha$ ]<sub>D</sub><sup>20</sup> + 9.8 (c 0.2 in CHCl<sub>3</sub>); **Chiral HPLC** analysis, Chiralpak ID, (*n*-hexane : *i*PrOH 88:12, flow rate 1.5 mLmin<sup>-1</sup>, 211 nm, 40 °C) t<sub>R</sub> (major) 12.5 min, t<sub>R</sub> (minor) 6.2 min, 84:16 er.

**<sup>1</sup>H NMR** (400 MHz, CDCl<sub>3</sub>)  $\delta$ <sub>H</sub>: 1.75 – 1.88 (2H, m, CH<sub>2</sub>(pyrr)), 1.88 – 1.96 (2H, m, CH<sub>2</sub>(pyrr)), 2.42 (6H, s, N(CH<sub>3</sub>)<sub>2</sub>), 3.15 (3H, s, C(O)NCH<sub>3</sub>), 3.36 – 3.48 (2H, m, NCH<sub>2</sub>(pyrr)), 3.55 (1H, dt, *J* 10.0, 7.0, N(CH<sup>A</sup>H<sup>B</sup>)(pyrr)), 3.74 (1H, dt, *J* 10.0, 6.6, N(CH<sup>A</sup>H<sup>B</sup>)(pyrr)), 3.81 (3H, s, OCH<sub>3</sub>), 3.94 (1H, d, *J* 10.8, C(1')H), 4.21 – 4.35 (1H, m, C(2)H), 5.23 (1H, dd, *J* 10.2, 1.2, C(4)H<sup>A</sup>H<sup>B</sup>), 5.29 (1H, d, *J* 17.3, C(4)H<sup>A</sup>H<sup>B</sup>), 5.89 (1H, ddd, *J* 17.2, 10.2, 8.8, C(3)H).

**<sup>13</sup>C{<sup>1</sup>H} NMR** (126 MHz, CDCl<sub>3</sub>)  $\delta$ <sub>C</sub>: 24.4 (CH<sub>2</sub>(pyrr)), 26.2 (CH<sub>2</sub>(pyrr)), 32.2 (C(O)NCH<sub>3</sub>), 41.9 (N(CH<sub>3</sub>)<sub>2</sub>), 45.5 (NCH<sub>2</sub>(pyrr)), 45.9 (C(2)H), 46.8 (NCH<sub>2</sub>(pyrr)), 61.5 (OCH<sub>3</sub>), 65.6 (C(1')H), 118.6 (C(4)H<sub>2</sub>), 135.1 (C(3)H), 168.7 (C(2')=O), 172.6 (C(1)=O).

**HRMS** (NSI<sup>+</sup>) C<sub>14</sub>H<sub>26</sub>N<sub>3</sub>O<sub>3</sub> [M+H]<sup>+</sup> found 284.1972, requires 284.1969 (+1.2 ppm).

**$\nu$ <sub>max</sub>** (film, cm<sup>-1</sup>) 2976 (C-H), 1647 (C=O), 1629 (C=O).

**3.6 (2R,3S)-2-(Dimethylamino)-3-(methoxy(methyl)carbamoyl)pent-4-enoic acid, benzyl ester (**29<sub>maj</sub>**) and (2R,3R)-2-(Dimethylamino)-3-(methoxy(methyl)carbamoyl)pent-4-enoic acid, benzyl ester (**29<sub>min</sub>**)**

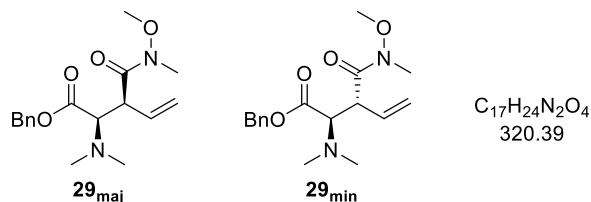

Following General Procedure 1.5, PNP ester **13** (78.2 mg, 0.30 mmol, 1.0 eq), Pd<sub>2</sub>dba<sub>3</sub>·CHCl<sub>3</sub> (7.7 mg, 7.5 μmol, 2.5 mol%), P(2-furyl)<sub>3</sub> (6.9 mg, 30 μmol, 10 mol%), (S)-TM·HCl (14.4 mg, 0.06 mmol, 20 mol%), phosphate **26** (105 mg, 0.37 mmol, 1.25 eq) and *i*Pr<sub>2</sub>NEt (125 μL, 0.7 mmol, 2.4 eq) in MeCN (5.0 mL) gave the crude product (63:37 dr), which was used directly for derivatisation with NaOBn (0.45 mL, 0.45 mmol, 1.5 eq) in THF (6.0 mL). Subsequent purification of the crude derivatised product via silica column chromatography (petrol : EtOAc 4:1 to EtOAc) gave:

*Major diastereoisomer* **29<sub>maj</sub>** (*R<sub>f</sub>* 0.12 in petrol : EtOAc 1:1) as yellow oil (33 mg, 34%).

$[\alpha]_D^{20}$  -1.6 (*c* 0.9 in CHCl<sub>3</sub>); **chiral HPLC analysis**, Chiralcel OD-H (95:5 hexane : *i*PrOH, flow rate 1 mL min<sup>-1</sup>, 211 nm, 40 °C) *t<sub>R</sub>*(2*R*,3*S*): 8.3 min, *t<sub>R</sub>*(2*S*,3*R*): 9.8 min, 87:13 er.

**<sup>1</sup>H NMR** (500 MHz, CDCl<sub>3</sub>) δ<sub>H</sub>: 2.31 (6H, s, N(CH<sub>3</sub>)<sub>2</sub>), 3.20 (3H, s, C(O)NCH<sub>3</sub>), 3.70 (3H, s, OCH<sub>3</sub>), 3.80 (1H, d, *J* 11.4, C(2)*H*), 4.10 – 4.19 (1H, m, C(3)*H*), 5.10 (1H, dd, *J* 10.1, 1.3, C(5)*H<sup>A</sup>H<sup>B</sup>*), 5.10 (1H, d, *J* 12.2, OCH<sup>*A*</sup>*H<sup>B</sup>*), 5.14 (1H, d, *J* 12.2, OCH<sup>*A*</sup>*H<sup>B</sup>*), 5.21 (1H, dt, *J* 17.2, 0.8, C(5)*H<sup>A</sup>H<sup>B</sup>*), 5.76 (1H, ddd, *J* 17.2, 10.2, 8.8, C(4)*H*), 7.29 – 7.37 (5H, m, 5 × Ar*H*).

**<sup>13</sup>C{<sup>1</sup>H} NMR** (126 MHz, CDCl<sub>3</sub>) δ<sub>C</sub>: 32.2 (C(O)NCH<sub>3</sub>), 42.0 (N(CH<sub>3</sub>)<sub>2</sub>), 45.9 (C(3)*H*), 61.7 (OCH<sub>3</sub>), 65.8 (OCH<sub>2</sub>), 68.9 (C(2)*H*), 119.9 (C(5)*H<sub>2</sub>*), 128.2 (ArCH), 128.5 (ArCH), 128.5 (ArCH), 133.3 (C(4)*H*), 135.8 (ArC), 169.4 (C=O<sub>ester</sub>), 172.1 (C=O<sub>amide</sub>).

**HRMS** (ESI<sup>+</sup>) C<sub>17</sub>H<sub>25</sub>N<sub>2</sub>O<sub>4</sub> [M+H]<sup>+</sup> found 321.1805 requires 321.1809 (-1.2 ppm).

**ν<sub>max</sub>** (CHCl<sub>3</sub>, cm<sup>-1</sup>) 3008 (=CH), 2943 (C-H), 2792 (N(C-H)), 1724 (C=O<sub>ester</sub>), 1654 (C=O<sub>amide</sub>), 1635 (C=C).

*Minor diastereoisomer* **29<sub>min</sub>** (*R<sub>f</sub>* 0.33 in petrol : EtOAc 1:1) as colourless glass (21 mg, 22%).

$[\alpha]_D^{20}$  +8.5 (*c* 1.4 in CHCl<sub>3</sub>); **chiral HPLC analysis**, Chiralcel OD-H (99:1 hexane : *i*PrOH, flow rate 1 mL min<sup>-1</sup>, 211 nm, 40 °C) *t<sub>R</sub>*(2*R*,3*R*): 16.3 min, *t<sub>R</sub>*(2*S*,3*S*): 19.0 min, 77:23 er.

**<sup>1</sup>H NMR** (500 MHz, CDCl<sub>3</sub>) δ<sub>H</sub>: 2.33 (6H, s, N(CH<sub>3</sub>)<sub>2</sub>), 3.12 (3H, s, C(O)NCH<sub>3</sub>), 3.69 (3H, s, OCH<sub>3</sub>), 3.83 (1H, d, *J* 11.3, C(2)*H*), 3.98 – 4.07 (1H, m, C(3)*H*), 5.05 (1H, d, *J* 12.3, OCH<sup>*A*</sup>*H<sup>B</sup>*),



5.20 – 5.26 (3H, m, OCH<sup>A</sup>H<sup>B</sup>, C(5)H<sub>2</sub>), 5.82 (1H, ddd, *J* 17.0, 10.5, 8.4, C(4)H), 7.28 – 7.38 (5H, m, 5 × ArH).

<sup>13</sup>C{<sup>1</sup>H} NMR (126 MHz, CDCl<sub>3</sub>) δ<sub>c</sub>: 32.1 (C(O)NCH<sub>3</sub>), 41.9 (N(CH<sub>3</sub>)<sub>2</sub>), 45.6 (C(3)H), 61.0 (OCH<sub>3</sub>), 66.1 (OCH<sub>2</sub>), 68.0 (C(2)H), 118.2 (C(5)H<sub>2</sub>), 128.2 (ArCH), 128.4 (ArCH), 128.5 (ArCH), 134.1 (C(4)H), 135.9 (ArC), 170.5 (C=O<sub>ester</sub>), 172.4 (C=O<sub>amide</sub>).

HRMS (ESI<sup>+</sup>) C<sub>17</sub>H<sub>24</sub>N<sub>2</sub>O<sub>4</sub>Na [M+Na]<sup>+</sup> found 343.1616, requires 343.1628 (−3.6 ppm).

ν<sub>max</sub> (CHCl<sub>3</sub>, cm<sup>−1</sup>) 3016 (=CH), 2943 (C-H), 2789 (N(C-H)), 1720 (C=O<sub>ester</sub>), 1651 (C=O<sub>amide</sub>), 1631 (C=C).

### 3.7 (E)-3-(Dimethylamino)-4-ethylidene-1-phenylpyrrolidine-2,5-dione ((E)-37) and (Z)-3-(Dimethylamino)-4-ethylidene-1-phenylpyrrolidine-2,5-dione ((Z)-37)

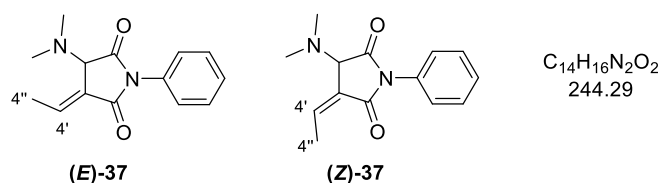

Following General Procedure 1.5, PNP ester **13** (78.2 mg, 0.30 mmol, 1.0 eq), Pd<sub>2</sub>dba<sub>3</sub>·CHCl<sub>3</sub> (7.7 mg, 7.5 μmol, 2.5 mol%), P(2-furyl)<sub>3</sub> (6.9 mg, 30 μmol, 10 mol%), (S)-TM·HCl (14.4 mg, 0.06 mmol, 20 mol%), phosphate **32** (118 mg, 0.37 mmol, 1.25 eq) and *i*Pr<sub>2</sub>NEt (125 μL, 0.7 mmol, 2.4 eq) in MeCN (5.0 mL) gave the crude product (80:20 (E):(Z)). Purification via silica column chromatography (pentane : EtOAc 4:1 to 1:1) gave:

(E)-37 (R<sub>f</sub> 0.36 in pentane : EtOAc 2:1) as colourless solid (23 mg, 32%).

[α]<sub>D</sub><sup>20</sup> +1.7 (*c* 1.15 in CHCl<sub>3</sub>); **chiral HPLC analysis**, Chiralcel OD-H (98:2 hexane : *i*PrOH, flow rate 1 mlmin<sup>−1</sup>, 254 nm, 30 °C) t<sub>R</sub> (minor): 18.0 min, t<sub>R</sub> (major): 21.0 min, 45:55 er.

<sup>1</sup>H NMR (500 MHz, CDCl<sub>3</sub>) δ<sub>H</sub>: 2.07 (3H, dd, *J* 7.3, 1.4, C(4'')H<sub>3</sub>), 2.52 (6H, s, N(CH<sub>3</sub>)<sub>2</sub>), 4.22 – 4.26 (1H, m, C(3)H), 7.21 (1H, qd, *J* 7.3, 2.2, C(4')H), 7.28 – 7.32 (2H, m, Ar(2,6)H), 7.36 – 7.40 (1H, m, Ar(4)H), 7.44 – 7.49 (2H, m, Ar(3,5)H).

<sup>13</sup>C{<sup>1</sup>H} NMR (126 MHz, CDCl<sub>3</sub>) δ<sub>c</sub>: 14.9 (C(4'')H<sub>3</sub>), 40.9 (N(CH<sub>3</sub>)<sub>2</sub>), 63.2 (C(3)H), 126.5 (ArC(2,6)H), 128.1 (C(4)), 128.5 (ArC(4)H), 129.0 (ArC(3,5)H), 131.6 (ArC(1)), 140.4 (C(4')H), 168.0 (C(5)=O), 174.1 (C(2)=O).

HRMS (ESI<sup>+</sup>) C<sub>14</sub>H<sub>17</sub>N<sub>2</sub>O<sub>2</sub> [M+H]<sup>+</sup> found 245.1276, requires 245.1284 (−3.4 ppm).

ν<sub>max</sub> (CHCl<sub>3</sub>, cm<sup>−1</sup>) 2939 (C-H), 1770, 1707 (C=O), 1674, 1597 (C=C<sub>Ar</sub>), 1494 (C=C<sub>Ar</sub>).

(**Z**)-**37** ( $R_f$  0.26 in pentane : EtOAc 1:1) as colourless oil (3 mg, 4%).

$[\alpha]_D^{20}$  -0.6 ( $c$  0.15 in  $\text{CHCl}_3$ ); **chiral HPLC analysis**, Chiralcel OD-H (99:1 hexane :  $i\text{PrOH}$ , flow rate 1  $\text{ml min}^{-1}$ , 254 nm, 30 °C)  $t_{R,1}$ : 20.1 min,  $t_{R,2}$ : 23.5 min, 50:50 er.

$^1\text{H NMR}$  (500 MHz,  $\text{CDCl}_3$ )  $\delta_H$ : 2.38 (3H, dd,  $J$  7.5, 1.9,  $\text{C}(4'')\text{H}_3$ ), 2.54 (6H, s,  $\text{N}(\text{CH}_3)_2$ ), 4.10 – 4.13 (1H, m,  $\text{C}(3)\text{H}$ ), 6.64 (1H, qd,  $J$  7.4, 1.9,  $\text{C}(4')\text{H}$ ), 7.27 – 7.31 (2H, m,  $\text{Ar}(2,6)\text{H}$ ), 7.36 – 7.41 (1H, m,  $\text{Ar}(4)\text{H}$ ), 7.45 – 7.49 (2H, m,  $\text{Ar}(3,5)\text{H}$ ).

$^{13}\text{C}\{^1\text{H}\}$  NMR (126 MHz,  $\text{CDCl}_3$ )  $\delta_C$ : 15.1 ( $\text{C}(4'')\text{H}_3$ ), 41.1 ( $\text{N}(\text{CH}_3)_2$ ), 65.3 ( $\text{C}(3)\text{H}$ ), 126.6 ( $\text{C}(4)$ ), 126.6 ( $\text{ArC}(2,6)\text{H}$ ), 128.5 ( $\text{ArC}(4)\text{H}$ ), 129.0 ( $\text{ArC}(3,5)\text{H}$ ), 131.5 ( $\text{ArC}(1)$ ), 142.8 ( $\text{C}(4')\text{H}$ ), 167.7 ( $\text{C}(5)=\text{O}$ ), 173.8 ( $\text{C}(2)=\text{O}$ ).

**HRMS** (ESI $^+$ )  $\text{C}_{14}\text{H}_{17}\text{N}_2\text{O}_2$   $[\text{M}+\text{H}]^+$  found 245.1277, requires 245.1284 (–3.1 ppm).

$\nu_{\text{max}}$  ( $\text{CHCl}_3$ ,  $\text{cm}^{-1}$ ) 2937 (C-H), 1766, 1705 (C=O), 1674, 1597 (C=C $_{\text{Ar}}$ ), 1496 (C=C $_{\text{Ar}}$ ).

### 3.8 (2*R*,3*S*)-2-(Dimethylamino)-3-(methyl(phenyl)carbamoyl)pent-4-enoic acid, benzyl ester (**38**<sub>maj</sub>) and (2*R*,3*R*)-2-(Dimethylamino)-3-(methyl(phenyl)carbamoyl)pent-4-enoic acid, benzyl ester (**38**<sub>min</sub>)

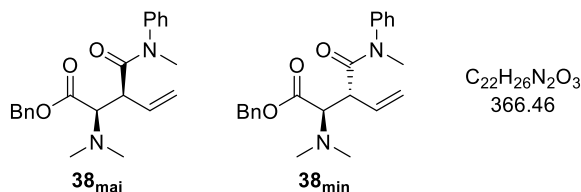

Following General Procedure 1.5, PNP ester **13** (78.2 mg, 0.30 mmol, 1.0 eq),  $\text{Pd}_2\text{dba}_3\cdot\text{CHCl}_3$  (7.7 mg, 7.5  $\mu\text{mol}$ , 2.5 mol%),  $\text{P}(2\text{-furyl})_3$  (6.9 mg, 30  $\mu\text{mol}$ , 10 mol%), (*S*)-TM $\cdot\text{HCl}$  (14.4 mg, 0.06 mmol, 20 mol%), phosphate **33** (122 mg, 0.37 mmol, 1.25 eq) and  $i\text{Pr}_2\text{NEt}$  (125  $\mu\text{L}$ , 0.7 mmol, 2.4 eq) in MeCN (5.0 mL) gave the crude product (57:43 dr), which was used directly for derivatisation with NaOBn (0.45 mL, 0.45 mmol, 1.5 eq) in THF (6.0 mL). Subsequent purification of the crude derivatised product via silica column chromatography ( $\text{CH}_2\text{Cl}_2$  : EtO 9:1 to 4:1) gave:

*Major diastereoisomer* **38**<sub>maj</sub> ( $R_f$  0.28 in  $\text{CH}_2\text{Cl}_2$  : EtO 4:1) as yellow glass (19 mg, 17%).

$[\alpha]_D^{20}$  +1.8 ( $c$  0.85 in  $\text{CHCl}_3$ ); **chiral HPLC analysis**, Chiralpak AD-H (98.2:1.8 hexane :  $i\text{PrOH}$ , flow rate 1  $\text{ml min}^{-1}$ , 211 nm, 30 °C)  $t_R$  (2*R*,3*S*): 26.8 min,  $t_R$  (2*S*,3*R*): 31.4 min, 66:34 er.

$^1\text{H NMR}$  (500 MHz,  $\text{CDCl}_3$ )  $\delta_H$ : 2.19 (6H, s,  $\text{N}(\text{CH}_3)_2$ ), 3.27 (3H, s,  $\text{C}(\text{O})\text{NCH}_3$ ), 3.40 (1H, dd,  $J$  11.1, 8.8,  $\text{C}(3)\text{H}$ ), 3.86 (1H, d,  $J$  11.2,  $\text{C}(2)\text{H}$ ), 4.94 (1H, d,  $J$  17.2,  $\text{C}(5)\text{H}^A\text{H}^B$ ), 5.00 (1H, d,  $J$  12.4,

OCH<sup>A</sup>H<sup>B</sup>), 5.03 – 5.08 (2H, m, OCH<sup>A</sup>H<sup>B</sup>, C(5)H<sup>A</sup>H<sup>B</sup>), 5.69 (1H, ddd, *J* 17.3, 10.2, 8.9, C(4)H), 7.19 (2H, m, 2 × NArH), 7.26 – 7.38 (6H, m, NArH, 5 × OArH), 7.38 – 7.43 (2H, m, 2 × NArH).

<sup>13</sup>C{<sup>1</sup>H} NMR (126 MHz, CDCl<sub>3</sub>) δ<sub>c</sub>: 37.7 (C(O)NCH<sub>3</sub>), 42.3 (N(CH<sub>3</sub>)<sub>2</sub>), 47.8 (C(3)H), 65.6 (OCH<sub>2</sub>), 69.4 (C(2)H), 119.8 (C(5)H<sub>2</sub>), 127.7 (NArCH), 128.0 (ArCH), 128.1 (ArCH), 128.3 (ArCH), 128.4 (ArCH), 129.5 (NArCH), 133.5 (C(4)H), 135.9 (OArC(1)), 143.4 (NArC(1)), 169.2 (C=O<sub>ester</sub>), 170.8 (C=O<sub>amide</sub>).

HRMS (ESI<sup>+</sup>) C<sub>22</sub>H<sub>26</sub>N<sub>2</sub>O<sub>3</sub>Na [M+Na]<sup>+</sup> found 389.1825, requires 389.1836 (−2.7 ppm).

ν<sub>max</sub> (CHCl<sub>3</sub>, cm<sup>−1</sup>) 3012 (=CH), 2943 (C-H), 2789 (N(C-H)), 1728 (C=O<sub>ester</sub>), 1651 (C=O<sub>amide</sub>), 1635 (C=C), 1597 (C=C<sub>Ar</sub>), 1496 (C=C<sub>Ar</sub>).

Minor diastereoisomer **38**<sub>min</sub> (R<sub>f</sub> 0.42 in CH<sub>2</sub>Cl<sub>2</sub> : Et<sub>2</sub>O 4:1) as yellow glass (18 mg, 17%).

[α]<sub>D</sub><sup>20</sup> +6.9 (c 0.6 in CHCl<sub>3</sub>); chiral HPLC analysis, Chiralcel OD-H (99.5:0.5 hexane : *i*PrOH, flow rate 1 mlmin<sup>−1</sup>, 211 nm, 30 °C) t<sub>R</sub>(2*R*,3*R*): 33.1 min, t<sub>R</sub>(2*S*,3*S*): 38.4 min, 67:33 er.

<sup>1</sup>H NMR (500 MHz, CDCl<sub>3</sub>) δ<sub>H</sub>: 2.18 (6H, s, N(CH<sub>3</sub>)<sub>2</sub>), 3.18 (3H, s, C(O)NCH<sub>3</sub>), 3.51 (1H, dd, *J* 10.9, 8.7, C(3)H), 3.85 (1H, d, *J* 10.9, C(2)H), 4.64 (1H, dt, *J* 17.2, 0.9, C(5)H<sup>A</sup>H<sup>B</sup>), 5.06 (1H, dd, *J* 10.2, 1.1, C(5)H<sup>A</sup>H<sup>B</sup>), 5.13 (1H, d, *J* 12.3, OCH<sup>A</sup>H<sup>B</sup>), 5.25 (1H, d, *J* 12.3, OCH<sup>A</sup>H<sup>B</sup>), 5.66 (1H, ddd, *J* 17.3, 10.1, 8.8), 7.18 – 7.23 (2H, m, 2 × NArH), 7.30 – 7.43 (8H, m, 3 × NArH, 5 × OArH).

<sup>13</sup>C{<sup>1</sup>H} NMR (126 MHz, CDCl<sub>3</sub>) δ<sub>c</sub>: 37.5 (C(O)NCH<sub>3</sub>), 41.9 (N(CH<sub>3</sub>)<sub>2</sub>), 47.2 (C(3)H), 66.1 (OCH<sub>2</sub>), 68.8 (C(2)H), 118.2 (C(5)H<sub>2</sub>), 127.8 (ArCH), 128.1 (ArCH), 128.2 (ArCH), 128.5 (ArCH), 128.5 (ArCH), 129.3 (ArCH), 134.3 (C(4)H), 136.0 (OArC(1)), 143.4 (NArC(1)), 170.4 (C=O<sub>ester</sub>), 171.1 (C=O<sub>amide</sub>).

HRMS (ESI<sup>+</sup>) C<sub>22</sub>H<sub>26</sub>N<sub>2</sub>O<sub>3</sub>Na [M+Na]<sup>+</sup> found 389.1822, requires 389.1836 (−3.5 ppm).

ν<sub>max</sub> (CHCl<sub>3</sub>, cm<sup>−1</sup>) 3012 (=CH), 2943 (C-H), 2789 (N(C-H)), 1724 (C=O<sub>ester</sub>), 1647 (C=O<sub>amide</sub>), 1631 (C=C), 1593 (C=C<sub>Ar</sub>), 1496 (C=C<sub>Ar</sub>).

### 3.9 (2*R*,3*S*)-3-(Benzyl(methyl)carbamoyl)-2-(dimethylamino)pent-4-enoic acid, benzyl ester (**39**<sub>maj</sub>) and (2*R*,3*R*)-3-(Benzyl(methyl)carbamoyl)-2-(dimethylamino)pent-4-enoic acid, benzyl ester (**39**<sub>min</sub>)

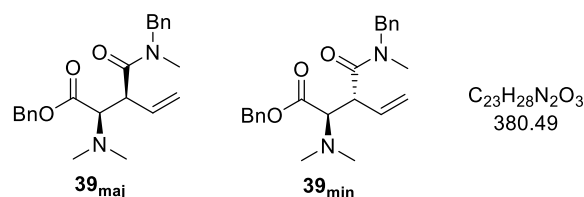

Following General Procedure 1.5, PNP ester **13** (78.2 mg, 0.30 mmol, 1.0 eq), Pd<sub>2</sub>dba<sub>3</sub>·CHCl<sub>3</sub> (7.7 mg, 7.5 μmol, 2.5 mol%), P(2-furyl)<sub>3</sub> (6.9 mg, 30 μmol, 10 mol%), (S)-TM·HCl (14.4 mg, 0.06 mmol, 20 mol%), phosphate **34** (205 mg, 0.6 mmol, 2.0 eq) and *i*Pr<sub>2</sub>NEt (125 μL, 0.7 mmol, 2.4 eq) in MeCN (5.0 mL) gave the crude product (54:46 dr), which was used directly for derivatisation with NaOBn (0.45 mL, 0.45 mmol, 1.5 eq) in THF (6.0 mL). Subsequent purification of the crude derivatised product via silica column chromatography (petrol : EtOAc 3:1 to 1:1) gave:

*Major diastereoisomer* **39**<sub>maj</sub> (R<sub>f</sub> 0.18 in petrol : EtOAc 1:1) as yellow oil (36 mg, 32%) as a rotameric mixture (3:2).

$[\alpha]_D^{20}$  -0.8 (c 0.5 in CHCl<sub>3</sub>); **chiral HPLC** analysis, Chiralcel OD-H (98:2 hexane : *i*PrOH, flow rate 1 mlmin<sup>-1</sup>, 211 nm, 40 °C) t<sub>R</sub>(2R,3S): 22.4 min, t<sub>R</sub>(2S,3R): 29.9 min, 71:29 er.

**<sup>1</sup>H NMR** (500 MHz, CDCl<sub>3</sub>) *major rotamer* δ<sub>H</sub>: 2.35 (6H, s, N(CH<sub>3</sub>)<sub>2</sub>), 2.97 (3H, s, C(O)NCH<sub>3</sub>), 3.89 (1H, dd, *J* 10.9, 8.5, C(3)H), 3.95 (1H, d, *J* 11.0, C(2)H), 4.54 (1H, d, *J* 14.9, NCH<sup>A</sup>H<sup>B</sup>), 4.75 (d, *J* 14.9, NCH<sup>A</sup>H<sup>B</sup>), 5.09 – 5.15 (2H, m, OCH<sup>A</sup>H<sup>B</sup>, C(5)H<sup>A</sup>H<sup>B</sup>), 5.17 (1H, d, *J* 12.3, OCH<sup>A</sup>H<sup>B</sup>), 5.22 (1H, d, *J* 17.2, C(5)H<sup>A</sup>H<sup>B</sup>), 5.78 (1H, ddd, *J* 17.3, 10.2, 8.5, C(4)H), 7.18 – 7.26 (3H, m, 3 × NBnH), 7.27 – 7.39 (7H, m, 2 × NBnH, 5 × OBnH); *minor rotamer (selected)* δ<sub>H</sub>: 2.23 (6H, s, N(CH<sub>3</sub>)<sub>2</sub>), 3.75 (1H, dd, *J* 10.8, 8.6, C(3)H), 3.96 (1H, d, *J* 10.9, C(2)H), 4.49 (1H, d, *J* 16.8, NCH<sup>A</sup>H<sup>B</sup>), 4.68 (1H, d, *J* 16.8, NCH<sup>A</sup>H<sup>B</sup>), 5.07 (1H, d, *J* 12.3, OCH<sup>A</sup>H<sup>B</sup>), 5.76 (1H, ddd, *J* 17.3, 10.3, 8.6, C(4)H).

**<sup>13</sup>C{<sup>1</sup>H} NMR** (126 MHz, CDCl<sub>3</sub>) *major rotamer* δ<sub>C</sub>: 34.8 (C(O)NCH<sub>3</sub>), 42.2 (N(CH<sub>3</sub>)<sub>2</sub>), 46.9 (C(3)H), 51.1 (NCH<sub>2</sub>), 65.9 (OCH<sub>2</sub>), 69.2 (C(2)H), 119.9 (C(5)H<sub>2</sub>), 127.2 (NBnCH), 127.7 (NBnCH), 128.2 (OBnCH), 128.2 (OBnCH), 128.5 (OBnCH), 128.8 (OBnCH), 133.0 (C(4)H), 135.8 (ArC<sub>ester</sub>), 137.2 (ArC<sub>amide</sub>), 169.7 (C=O<sub>ester</sub>), 171.6 (C=O<sub>amide</sub>); *minor rotamer (selected)* δ<sub>C</sub>: 34.5 (C(O)NCH<sub>3</sub>), 42.4 (N(CH<sub>3</sub>)<sub>2</sub>), 46.7 (C(3)H), 53.0 (NCH<sub>2</sub>), 65.8 (OCH<sub>2</sub>), 119.9 (C(5)H<sub>2</sub>), 126.5 (NBnCH), 127.6 (NBnCH), 133.3 (C(4)H), 136.6 (ArC<sub>amide</sub>), 169.4 (C=O<sub>ester</sub>), 171.4 (C=O<sub>amide</sub>).

**HRMS** (ESI<sup>+</sup>) C<sub>23</sub>H<sub>29</sub>N<sub>2</sub>O<sub>3</sub> [M+H]<sup>+</sup> found 381.2165, requires 381.2173 (-2.0 ppm).

**ν<sub>max</sub>** (CHCl<sub>3</sub>, cm<sup>-1</sup>) 3012 (=CH), 2943 (C-H), 2789 (N(C-H)), 1724 (C=O<sub>ester</sub>), 1643 (C=O<sub>amide</sub>), 1631 (C=C).

*Minor diastereoisomer* **39**<sub>min</sub> (R<sub>f</sub> 0.32 in petrol : EtOAc 1:1) as yellow oil (30 mg, 26%) as a rotameric mixture (2:1).

$[\alpha]_D^{20}$  +0.7 (c 0.8 in CHCl<sub>3</sub>); **chiral HPLC** analysis, Chiralcel OD-H (98:2 hexane : *i*PrOH, flow rate 1 mlmin<sup>-1</sup>, 211 nm, 40 °C) t<sub>R</sub>(2R,3R): 13.4 min, t<sub>R</sub>(2S,3S): 20.8 min, 53:47 er.

**<sup>1</sup>H NMR** (500 MHz, CDCl<sub>3</sub>) *major rotamer* δ<sub>H</sub>: 2.36 (6H, s, N(CH<sub>3</sub>)<sub>2</sub>), 2.99 (3H, s, C(O)NCH<sub>3</sub>), 3.81 – 3.88 (1H, m, C(3)H), 3.95 (1H, d, *J* 10.8, C(2)H), 4.57 (2H, s, NCH<sub>2</sub>), 5.15 (1H, app. t, *J* 12.3, OCH<sup>A</sup>H<sup>B</sup>), 5.18 – 5.31 (3H, m, OCH<sup>A</sup>H<sup>B</sup>, C(5)H<sub>2</sub>), 5.87 – 5.97 (1H, m, C(4)H), 7.20 (1H, d, *J* 7.5, ArCH), 7.24 – 7.29 (1H, m, ArCH), 7.29 – 7.44 (8H, m, ArCH). *minor rotamer (selected)* δ<sub>H</sub>: 2.32 (6H, s, N(CH<sub>3</sub>)<sub>2</sub>), 2.82 (3H, s, C(O)NCH<sub>3</sub>), 3.92 (1H, d, *J* 10.8, C(2)H), 4.48 (1H, d, *J* 16.4, NCH<sup>A</sup>H<sup>B</sup>), 4.65 (1H, d, *J* 16.4, NCH<sup>A</sup>H<sup>B</sup>), 5.07 (1H, d, *J* 17.4, C(5)H<sup>A</sup>H<sup>B</sup>), 5.15 (1H, app. t, *J* 12.3, OCH<sup>A</sup>H<sup>B</sup>).

**<sup>13</sup>C{<sup>1</sup>H} NMR** (126 MHz, CDCl<sub>3</sub>) *major rotamer* δ<sub>C</sub>: 34.7 (C(O)NCH<sub>3</sub>), 42.0 (N(CH<sub>3</sub>)<sub>2</sub>), 46.6 (C(3)H), 50.9 (NCH<sub>2</sub>), 66.1 (OCH<sub>2</sub>), 68.8 (C(2)H), 118.1 (C(5)H<sub>2</sub>), 127.1 (ArCH), 127.2 (ArCH), 127.5 (ArCH), 127.8 (ArCH), 128.1 (ArCH), 128.4 (ArCH), 128.4 (ArCH), 128.5 (ArCH), 128.5 (ArCH), 128.7 (ArCH), 134.1 (C(4)H), 136.0 (ArC<sub>ester</sub>), 137.2 (ArC<sub>amide</sub>), 170.6 (C=O<sub>ester</sub>), 171.6 (C=O<sub>amide</sub>); *minor rotamer (selected)* δ<sub>C</sub>: 33.5 (C(O)NCH<sub>3</sub>), 42.0 (N(CH<sub>3</sub>)<sub>2</sub>), 46.5 (C(3)H), 53.2 (NCH<sub>2</sub>), 66.0 (OCH<sub>2</sub>), 69.0 (C(2)H), 118.1 (C(5)H<sub>2</sub>), 134.6 (C(4)H), 136.1 (ArC<sub>ester</sub>), 136.5 (ArC<sub>amide</sub>), 170.3 (C=O<sub>ester</sub>), 171.7 (C=O<sub>amide</sub>).

**HRMS** (ESI<sup>+</sup>) C<sub>23</sub>H<sub>29</sub>N<sub>2</sub>O<sub>3</sub> [M+H]<sup>+</sup> found 381.2160, requires 381.2173 (–3.3 ppm).

**ν<sub>max</sub>** (CHCl<sub>3</sub>, cm<sup>–1</sup>) 3016 (=CH), 2943 (C–H), 2792 (N(C–H)), 1720 (C=O<sub>ester</sub>), 1627 (C=C), 1593 (C=C<sub>Ar</sub>).

### 3.10 (2*R*,3*S*)-2-(Dimethylamino)-3-(pyrrolidine-1-carbonyl)pent-4-enoic acid, benzyl ester (40<sub>maj</sub>) and (2*S*,3*S*)-2-(Dimethylamino)-3-(pyrrolidine-1-carbonyl)pent-4-enoic acid, benzyl ester (40<sub>min</sub>)

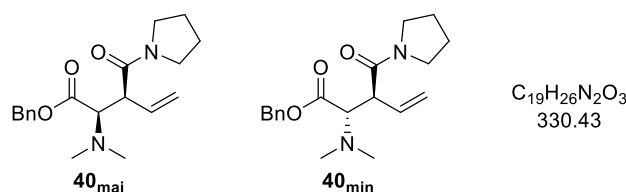

Following General Procedure 1.5, PNP ester **13** (78.2 mg, 0.30 mmol, 1.0 eq), Pd<sub>2</sub>dba<sub>3</sub>·CHCl<sub>3</sub> (7.7 mg, 7.5 μmol, 2.5 mol%), P(2-furyl)<sub>3</sub> (6.9 mg, 30 μmol, 10 mol%), (*S*)-TM·HCl (14.4 mg, 0.06 mmol, 20 mol%), phosphate **35** (109 mg, 0.37 mmol, 1.25 eq) and *i*Pr<sub>2</sub>NEt (125 μL, 0.7 mmol, 2.4 eq) in MeCN (5.0 mL) gave the crude product (61:39 dr), which was used directly for derivatisation with NaOBn (0.45 mL, 0.45 mmol, 1.5 eq) in THF (6.0 mL). Subsequent purification of the crude derivatised product via silica column chromatography (petrol : EtOAc 1:2 to EtOAc : 15% *i*PrOH) gave:

Major diastereoisomer **40<sub>maj</sub>** (*R<sub>f</sub>* 0.09 in EtOAc) as yellow glass (28 mg, 28%).

**m.p.** (EtOAc) 58 – 60 °C;  $[\alpha]_D^{20}$  -0.9 (*c* 0.9 in CHCl<sub>3</sub>); **chiral HPLC** analysis, Chiralcel OD-H (95:5 hexane : *i*PrOH, flow rate 1 mlmin<sup>-1</sup>, 211 nm, 40 °C) *t<sub>R</sub>*(2*R*,3*S*): 12.4 min, *t<sub>R</sub>*(2*S*,3*R*): 19.0 min, 71:29 er.

**<sup>1</sup>H NMR** (500 MHz, CDCl<sub>3</sub>)  $\delta_H$ : 1.78 – 2.01 (4H, m, 2 × CH<sub>2</sub>(pyrr)), 2.31 (6H, s, N(CH<sub>3</sub>)<sub>2</sub>), 3.40 – 3.56 (4H, m, 2 × NCH<sub>2</sub>(pyrr)), 3.60 (1H, dd, *J* 11.0, 8.8, C(3)*H*), 3.90 (1H, d, *J* 11.0, C(2)*H*), 5.07 (1H, dd, *J* 10.1, 1.1, C(5)*H<sup>A</sup>H<sup>B</sup>*), 5.09 (1H, d, *J* 12.3, OCH<sup>*A*</sup>*H<sup>B</sup>*), 5.13 (1H, d, *J* 12.3, OCH<sup>*A*</sup>*H<sup>B</sup>*), 5.17 (1H, d, *J* 17.2, C(5)*H<sup>A</sup>H<sup>B</sup>*), 5.71 (1H, ddd, *J* 17.3, 10.1, 8.9 Hz, C(4)*H*), 7.29 – 7.37 (5H, m, 5 × ArH).

**<sup>13</sup>C{<sup>1</sup>H} NMR** (126 MHz, CDCl<sub>3</sub>)  $\delta_C$ : 24.3 (CH<sub>2</sub>(pyrr)), 26.1 (CH<sub>2</sub>(pyrr)), 42.2 (N(CH<sub>3</sub>)<sub>2</sub>), 46.0 (NCH<sub>2</sub>(pyrr)), 46.3 (NCH<sub>2</sub>(pyrr)), 49.4 (C(3)*H*), 65.8 (OCH<sub>2</sub>), 68.9 (C(2)*H*), 119.6 (C(5)*H*<sub>2</sub>), 128.3 (ArCH), 128.5 (ArCH), 133.2 (C(4)*H*), 135.9 (ArC), 169.1 (C=O<sub>amide</sub>), 169.8 (C=O<sub>ester</sub>).

**HRMS** (ESI<sup>+</sup>) C<sub>19</sub>H<sub>26</sub>N<sub>2</sub>O<sub>3</sub>Na [M+Na]<sup>+</sup> found 353.1826, requires 353.1836 (-2.7 ppm).

$\nu_{\max}$  (CHCl<sub>3</sub>, cm<sup>-1</sup>) 2981 (C-H), 2789 (N(C-H)), 1724 (C=O<sub>ester</sub>), 1627 (C=O<sub>amide</sub>).

Minor diastereoisomer **40<sub>min</sub>** (*R<sub>f</sub>* 0.37 in EtOAc) as yellow solid (30 mg, 30%). (JB-210-3)

**m.p.** (EtOAc) 97 – 99 °C;  $[\alpha]_D^{20}$  +4.8 (*c* 0.45 in CHCl<sub>3</sub>); **chiral HPLC** analysis, Chiralcel OD-H (95:5 hexane : *i*PrOH, flow rate 1 mlmin<sup>-1</sup>, 211 nm, 40 °C) *t<sub>R</sub>*(2*S*,3*S*): 7.9 min, *t<sub>R</sub>*(2*R*,3*R*): 8.8 min, 66:34 er.

**<sup>1</sup>H NMR** (500 MHz, CDCl<sub>3</sub>)  $\delta_H$ : 1.71 – 1.92 (4H, m, 2 × CH<sub>2</sub>(pyrr)), 2.32 (6H, s, N(CH<sub>3</sub>)<sub>2</sub>), 3.33 – 3.43 (2H, m, NCH<sub>2</sub>(pyrr)), 3.45 – 3.55 (2H, m, NCH<sub>2</sub>(pyrr)), 3.60 (1H, m, C(3)*H*), 3.89 (1H, d, *J* 10.9, C(2)*H*), 5.04 (1H, d, *J* 12.3, OCH<sup>*A*</sup>*H<sup>B</sup>*), 5.16 (1H, d, *J* 17.3, C(5)*H<sup>A</sup>H<sup>B</sup>*), 5.21 (1H, d, *J* 10.1, C(5)*H<sup>A</sup>H<sup>B</sup>*), 5.22 (1H, d, *J* 12.3, OCH<sup>*A*</sup>*H<sup>B</sup>*), 5.82 (1H, dt, *J* 17.3, 9.4, C(4)*H*), 7.28 – 7.38 (5H, m, 5 × ArH).

**<sup>13</sup>C{<sup>1</sup>H} NMR** (126 MHz, CDCl<sub>3</sub>)  $\delta_C$ : 24.2 (CH<sub>2</sub>(pyrr)), 25.9 (CH<sub>2</sub>(pyrr)), 41.9 (N(CH<sub>3</sub>)<sub>2</sub>), 45.8 (NCH<sub>2</sub>(pyrr)), 46.1 (NCH<sub>2</sub>(pyrr)), 49.0 (C(3)*H*), 66.1 (OCH<sub>2</sub>), 68.2 (C(2)*H*), 117.7 (C(5)*H*<sub>2</sub>), 128.1 (ArCH), 128.4 (ArCH), 128.4 (ArCH), 134.4 (C(4)*H*), 136.0 (ArC), 169.6 (C=O<sub>amide</sub>), 170.4 (C=O<sub>ester</sub>).

**HRMS** (ESI<sup>+</sup>) C<sub>19</sub>H<sub>26</sub>N<sub>2</sub>O<sub>3</sub>Na [M+Na]<sup>+</sup> found 353.1823, requires 353.1836 (-3.6 ppm).

$\nu_{\max}$  (CHCl<sub>3</sub>, cm<sup>-1</sup>) 2974 (C-H), 2789 (N(C-H)), 1720 (C=O<sub>ester</sub>), 1627 (C=O<sub>amide</sub>).

**3.11 (2*R*,3*S*)-2-(Dimethylamino)-3-(morpholine-4-carbonyl)pent-4-enoic acid, benzyl ester (**41<sub>maj</sub>**) and (2*R*,3*R*)-2-(Dimethylamino)-3-(morpholine-4-carbonyl)pent-4-enoic acid, benzyl ester (**41<sub>min</sub>**)**

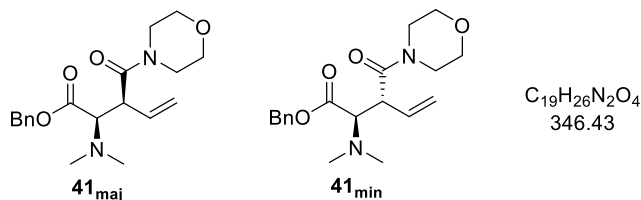

Following General Procedure 1.5, PNP ester **13** (78.2 mg, 0.30 mmol, 1.0 eq),  $Pd_2dba_3 \cdot CHCl_3$  (7.7 mg, 7.5  $\mu$ mol, 2.5 mol%),  $P(2\text{-furyl})_3$  (6.9 mg, 30  $\mu$ mol, 10 mol%), (*S*)-TM $\cdot$ HCl (14.4 mg, 0.06 mmol, 20 mol%), phosphate **36** (115 mg, 0.37 mmol, 1.25 eq) and *i*Pr<sub>2</sub>NEt (125  $\mu$ L, 0.7 mmol, 2.4 eq) in MeCN (5.0 mL) gave the crude product (64:36 dr), which was used directly for derivatisation with NaOBn (0.45 mL, 0.45 mmol, 1.5 eq) in THF (6.0 mL). Subsequent purification of the crude derivatised product via silica column chromatography (petrol : EtOAc 1:2 to EtOAc : 15% *i*PrOH) gave:

*Major diastereoisomer 41<sub>maj</sub>* ( $R_f$  0.14 in EtOAc) as yellow glass (22 mg, 21%).

$[\alpha]_D^{20}$  -0.5 (*c* 1.1 in  $CHCl_3$ ); **chiral HPLC** analysis, Chiralcel OD-H (95:5 hexane : *i*PrOH, flow rate 1 mLmin<sup>-1</sup>, 211 nm, 40 °C)  $t_R$  (2*R*,3*S*): 15.4 min,  $t_R$  (2*S*,3*R*): 18.7 min, 75:25 er.

**<sup>1</sup>H NMR** (500 MHz,  $CDCl_3$ )  $\delta_H$ : 2.30 (6H, s, N(CH<sub>3</sub>)<sub>2</sub>), 3.50 – 3.74 (8H, m, 4  $\times$  CH<sub>2</sub>(morph)), 3.77 (1H, dd, *J* 10.9, 8.6, C(3)*H*), 3.90 (1H, d, *J* 10.9, C(2)*H*), 5.09 (1H, d, *J* 12.3, OCH<sup>A</sup>H<sup>B</sup>), 5.11 (1H, dd, *J* 10.2, 0.8, C(5)*H*<sup>A</sup>H<sup>B</sup>), 5.14 (1H, d, *J* 12.3, OCH<sup>A</sup>H<sup>B</sup>), 5.15 (1H, br d, *J* 17.2, C(5)*H*<sup>A</sup>H<sup>B</sup>), 5.72 (1H, ddd, *J* 17.3, 10.2, 8.5, C(4)*H*), 7.29 – 7.37 (5H, m, 5  $\times$  Ar*H*).

**<sup>13</sup>C{<sup>1</sup>H} NMR** (126 MHz,  $CDCl_3$ )  $\delta_C$ : 42.1 (N(CH<sub>3</sub>)<sub>2</sub>), 42.6 (NCH<sub>2</sub>(morph)), 46.1 (C(3)*H*), 46.2 (NCH<sub>2</sub>(morph)), 66.0 (OCH<sub>2</sub>), 66.7 (OCH<sub>2</sub>(morph)), 67.0 (OCH<sub>2</sub>(morph)), 69.0 (C(2)*H*), 120.0 (C(5)*H*<sub>2</sub>), 128.3 (ArCH), 128.6 (ArCH), 128.6 (ArCH), 133.1 (C(4)*H*), 135.8 (ArC), 169.5 (C=O<sub>amide</sub>), 169.6 (C=O<sub>ester</sub>).

**HRMS** (ESI<sup>+</sup>)  $C_{19}H_{27}N_2O_4$  [M+H]<sup>+</sup> found 347.1959, requires 347.1966 (-1.8 ppm).

$\nu_{max}$  ( $CHCl_3$ , cm<sup>-1</sup>) 3012 (=CH), 2862 (C-H), 2789 (N(C-H)), 1724 (C=O<sub>ester</sub>), 1643 (C=O<sub>amide</sub>), 1631 (C=C).

*Minor diastereoisomer 41<sub>min</sub>* ( $R_f$  0.42 in EtOAc) as yellow glass (12 mg, 11%). (JB-211-3)

$[\alpha]_D^{20}$  +1.6 (*c* 0.35 in  $CHCl_3$ ); **chiral HPLC** analysis, Chiralcel OD-H (97:3 hexane : *i*PrOH, flow rate 1 mLmin<sup>-1</sup>, 211 nm, 40 °C)  $t_R$  (2*S*,3*S*): 14.0 min,  $t_R$  (2*R*,3*R*): 15.9 min, 44:56 er.

**<sup>1</sup>H NMR** (500 MHz, CDCl<sub>3</sub>) δ<sub>H</sub>: 2.31 (6H, s, N(CH<sub>3</sub>)<sub>2</sub>), 3.46 – 3.52 (3H, m, NCH<sub>2</sub>(morph), NCH<sup>A</sup>H<sup>B</sup>(morph)), 3.55 – 3.66 (5H, m, 2 × OCH<sub>2</sub>(morph), NCH<sup>A</sup>H<sup>B</sup>(morph)), 3.74 (1H, dd, *J* 10.8, 8.3, C(3)*H*), 3.86 (1H, d, *J* 10.8, C(2)*H*), 5.06 (1H, d, *J* 12.3, OCH<sup>A</sup>H<sup>B</sup>), 5.14 (1H, dt, *J* 17.3, 0.9, C(5)*H*<sup>A</sup>H<sup>B</sup>), 5.23 (1H, d, *J* 12.3, OCH<sup>A</sup>H<sup>B</sup>), 5.24 (1H, d, *J* 10.3, C(5)*H*<sup>A</sup>H<sup>B</sup>), 5.85 (1H, ddd, *J* 17.4, 10.3, 8.3, C(4)*H*), 7.29 – 7.38 (5H, m, 5 × Ar*H*).

**<sup>13</sup>C{<sup>1</sup>H} NMR** (126 MHz, CDCl<sub>3</sub>) δ<sub>C</sub>: 42.0 (N(CH<sub>3</sub>)<sub>2</sub>), 42.1 (NCH<sub>2</sub>(morph)), 45.8 (C(3)*H*), 46.0 (NCH<sub>2</sub>(morph)), 66.1 (OCH<sub>2</sub>), 66.4 (OCH<sub>2</sub>(morph)), 66.8 (OCH<sub>2</sub>(morph)), 68.6 (C(2)*H*), 118.0 (C(5)*H*<sub>2</sub>), 128.2 (ArCH), 128.4 (ArCH), 128.5 (ArCH), 134.3 (C(4)*H*), 135.9 (ArC), 170.0 (C=O<sub>amide</sub>), 170.3 (C=O<sub>ester</sub>).

**HRMS** (ESI<sup>+</sup>) C<sub>19</sub>H<sub>26</sub>N<sub>2</sub>O<sub>4</sub>Na [M+Na]<sup>+</sup> found 369.1772, requires 369.1785 (−3.4 ppm).

**ν<sub>max</sub>** (CHCl<sub>3</sub>, cm<sup>−1</sup>) 3012 (=CH), 2974 (C-H), 2792 (N(C-H)), 1720 (C=O<sub>ester</sub>), 1627 (C=C).

**3.12 (2*R*,3*S*)-3-(methoxy(methyl)carbamoyl)-2-(piperidin-1-yl)pent-4-enoic acid, benzyl ester (42<sub>maj</sub>) and (2*R*,3*R*)-3-(methoxy(methyl)carbamoyl)-2-(piperidin-1-yl)pent-4-enoic acid, benzyl ester (42<sub>min</sub>)**

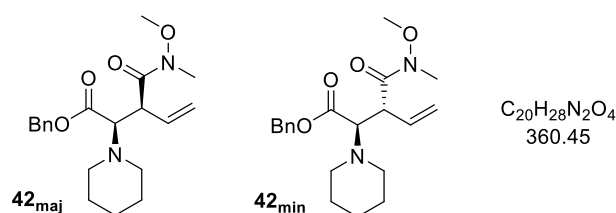

Following General Procedure 1.5, PNP ester **30** (90.2 mg, 0.30 mmol, 1.0 eq), Pd<sub>2</sub>dba<sub>3</sub>·CHCl<sub>3</sub> (7.7 mg, 7.5 μmol, 2.5 mol%), P(2-furyl)<sub>3</sub> (6.9 mg, 30 μmol, 10 mol%), (*S*)-TM·HCl (14.4 mg, 0.06 mmol, 20 mol%), phosphate **26** (105 mg, 0.37 mmol, 1.25 eq) and *i*Pr<sub>2</sub>NEt (125 μL, 0.7 mmol, 2.4 eq) in MeCN (5.0 mL) after 84 h gave the crude product (61:39 dr), which was used directly for derivatisation with NaOBn (0.45 mL, 0.45 mmol, 1.5 eq) in THF (6.0 mL). Subsequent purification of the crude derivatised product via silica column chromatography (CH<sub>2</sub>Cl<sub>2</sub> to CH<sub>2</sub>Cl<sub>2</sub>:Et<sub>2</sub>O 95:5, *R<sub>f</sub>* 0.32 in CH<sub>2</sub>Cl<sub>2</sub>:Et<sub>2</sub>O 95:5) gave the title compound as a colourless glass (31 mg, 29%) as an inseparable mixture of diastereoisomers. The enantiomeric ratios for the major and minor diastereoisomer could not be determined.

[α]<sub>D</sub><sup>20</sup> +2.1 (*c* 1.3 in CHCl<sub>3</sub>).

**HRMS** (ESI<sup>+</sup>) C<sub>20</sub>H<sub>28</sub>N<sub>2</sub>O<sub>4</sub> [M+H]<sup>+</sup> found 361.2109, requires 361.2122 (−3.5 ppm).

**ν<sub>max</sub>** (CHCl<sub>3</sub>, cm<sup>−1</sup>) 2933 (C-H), 1726 (C=O<sub>ester</sub>), 1658 (C=O<sub>amide</sub>), 1635 (C=C), 1498 (C=C<sub>Ar</sub>).



Data for major diastereoisomer **42<sub>maj</sub>**:

**<sup>1</sup>H NMR** (500 MHz, CDCl<sub>3</sub>)  $\delta_{\text{H}}$ : 1.29 – 1.55 (6H, m, 3  $\times$  CH<sub>2</sub>(pip)), 2.29 – 2.39 (2H, m, NCH<sub>2</sub>), 2.66 – 2.75 (2H, m, NCH<sub>2</sub>), 3.20 (3H, s, NCH<sub>3</sub>), 3.68 (3H, s, OCH<sub>3</sub>), 3.71 (1H, d, *J* 11.4, C(2)*H*), 4.14 – 4.26 (1H, m, C(3)*H*), 5.01 – 5.24 (4H, m, C(5)*H*<sub>2</sub>, OCH<sub>2</sub>), 5.79 (1H, ddd, *J* 17.2, 10.2, 8.7, C(4)*H*), 7.28 – 7.39 (5H, m, 5  $\times$  Ar*H*).

**<sup>13</sup>C{<sup>1</sup>H} NMR** (126 MHz, CDCl<sub>3</sub>)  $\delta_{\text{C}}$ : 24.5 (C(4)*H*<sub>2</sub>(pip)), 26.7 (C(3,5)*H*<sub>2</sub>(pip)), 32.4 (NCH<sub>3</sub>), 45.7 (C(3)*H*), 51.2 (NCH<sub>2</sub>), 61.8 (OCH<sub>3</sub>), 65.8 (OCH<sub>2</sub>), 70.2 (C(2)*H*), 119.6 (C(5)*H*<sub>2</sub>), 128.2 (ArC(4)*H*), 128.4 (ArC(2,6) and ArC(3,5)), 133.5 (C(4)*H*), 135.9 (ArC(1)), 169.4 (C=O<sub>ester</sub>),

Data for minor diastereomer **42<sub>min</sub>**:

**<sup>1</sup>H NMR** (500 MHz, CDCl<sub>3</sub>) (*selected*)  $\delta_{\text{H}}$ : 3.12 (3H, s, NCH<sub>3</sub>), 3.73 (1H, d, *J* 11.2, C(2)*H*), 3.98 – 4.08 (1H, C(3)*H*), 5.85 (1H, ddd, *J* 17.3, 10.3, 7.7, C(4)*H*).

**<sup>13</sup>C{<sup>1</sup>H} NMR** (126 MHz, CDCl<sub>3</sub>) (*selected*)  $\delta_{\text{C}}$ : 24.5 (C(4)*H*<sub>2</sub>(pip)), 26.5 (C(3,5)*H*<sub>2</sub>(pip)), 32.0 (NCH<sub>3</sub>), 44.8 (C(3)*H*), 51.5 (NCH<sub>2</sub>), 61.1 (OCH<sub>3</sub>), 66.0 (OCH<sub>2</sub>), 68.8 (C(2)*H*), 117.3 (C(5)*H*<sub>2</sub>), 128.1 (ArC(4)*H*), 128.4 (ArC(2,3,5,6)), 134.6 (C(4)*H*), 136.0 (ArC(1)), 170.9 (C=O<sub>ester</sub>), 172.7 (C=O<sub>amide</sub>)\*.

\* peak not visible in 1D <sup>13</sup>C NMR, but inferred from cross peaks in the HMBC spectrum.

**3.13 (2*R*,3*S*)-2-(allyl(methyl)amino)-3-(methoxy(methyl)carbamoyl)pent-4-enoic acid, benzyl ester (**43<sub>maj</sub>**) and (2*R*,3*R*)-2-(allyl(methyl)amino)-3-(methoxy(methyl) carbamoyl)pent-4-enoic acid, benzyl ester (**43<sub>min</sub>**)**

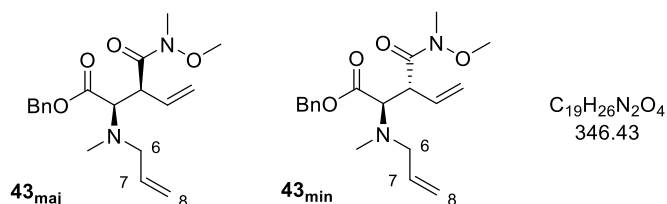

Following General Procedure 1.5, PNP ester **31** (86.0 mg, 0.30 mmol, 1.0 eq), Pd<sub>2</sub>dba<sub>3</sub>·CHCl<sub>3</sub> (7.7 mg, 7.5  $\mu$ mol, 2.5 mol%), P(2-furyl)<sub>3</sub> (6.9 mg, 30  $\mu$ mol, 10 mol%), (*S*)-TM·HCl (14.4 mg, 0.06 mmol, 20 mol%), phosphate **26** (105 mg, 0.37 mmol, 1.25 eq) and *i*Pr<sub>2</sub>NEt (125  $\mu$ L, 0.7 mmol, 2.4 eq) in MeCN (5.0 mL) gave the crude product (56:44 dr), which was used directly for derivatisation with NaOBn (0.45 mL, 0.45 mmol, 1.5 eq) in THF (6.0 mL). Subsequent purification of the crude derivatised product via silica column chromatography (CH<sub>2</sub>Cl<sub>2</sub> to CH<sub>2</sub>Cl<sub>2</sub>:Et<sub>2</sub>O 95:5) gave:

Major diastereoisomer **43<sub>maj</sub>** (*R<sub>f</sub>* 0.22 in CH<sub>2</sub>Cl<sub>2</sub> : Et<sub>2</sub>O 95:5) as colourless oil (11 mg, 11%).

$[\alpha]_D^{20}$  -0.4 (*c* 0.45 in CHCl<sub>3</sub>); **chiral HPLC** analysis, Chiralcel OD-H (99:1 hexane : *i*PrOH, flow rate 1 mlmin<sup>-1</sup>, 211 nm, 30 °C) *t<sub>R</sub>* (2*R*,3*S*): 17.1 min, *t<sub>R</sub>* (2*S*,3*R*): 22.7 min, 85:15 er.

**<sup>1</sup>H NMR** (500 MHz, CDCl<sub>3</sub>)  $\delta_H$ : 2.27 (3H, s, NCH<sub>3</sub>), 2.88 (1H, dd, *J* 13.9, 7.2, C(6)*H<sup>A</sup>H<sup>B</sup>*), 3.19 (3H, s, CONCH<sub>3</sub>), 3.31 (1H, dd, *J* 14.0, 5.2, C(6)*H<sup>A</sup>H<sup>B</sup>*), 3.69 (3H, s, OCH<sub>3</sub>), 3.87 (1H, d, *J* 11.5, C(2)*H*), 4.13 – 4.23 (1H, m, C(3)*H*), 5.03 – 5.12 (4H, m, OCH<sup>A</sup>*H<sup>B</sup>*, C(5)*H<sup>A</sup>H<sup>B</sup>*, C(8)*H<sub>2</sub>*), 5.16 (1H, d, *J* 12.3, OCH<sup>A</sup>*H<sup>B</sup>*), 5.21 (1H, ddd, *J* 17.1, 1.3, 0.7, C(5)*H<sup>A</sup>H<sup>B</sup>*), 5.69 (1H, dddd, *J* 17.3, 10.1, 7.2, 5.2, C(7)*H*), 5.78 (1H, ddd, *J* 17.2, 10.2, 8.7, C(4)*H*), 7.30 – 7.38 (5H, m, 5 × Ar*H*).

**<sup>13</sup>C{<sup>1</sup>H} NMR** (126 MHz, CDCl<sub>3</sub>)  $\delta_C$ : 32.2 (CONCH<sub>3</sub>), 38.8 (NCH<sub>3</sub>), 46.0 (C(3)*H*), 57.3 (C(6)*H<sub>2</sub>*), 61.8 (OCH<sub>3</sub>), 65.9 (OCH<sub>2</sub>), 67.7 (C(2)*H*), 116.8 (C(8)*H<sub>2</sub>*), 119.8 (C(5)*H<sub>2</sub>*), 128.2 (ArC(4)*H*), 128.5 (ArC(2,6)*H*, ArC(3,5)*H*), 133.4 (C(4)*H*), 135.8 (ArC(1)), 136.2 (C(7)*H*), 169.7 (C=O<sub>ester</sub>), 172.3 (C=O<sub>amide</sub>)\*.

\* peak not visible in 1D <sup>13</sup>C NMR, but inferred from cross peaks in the HMBC spectrum.

**HRMS** (ESI<sup>+</sup>) C<sub>19</sub>H<sub>27</sub>N<sub>2</sub>O<sub>4</sub> [M+H]<sup>+</sup> found 347.1954, requires 347.1965 (–3.3 ppm).

$\nu_{\max}$  (CHCl<sub>3</sub>, cm<sup>-1</sup>) 2939 (C–H), 1728 (C=O<sub>ester</sub>), 1660 (C=O<sub>amide</sub>), 1637 (C=C), 1496 (C=C<sub>Ar</sub>).

*Minor diastereoisomer 43<sub>min</sub>* (*R<sub>f</sub>* 0.30 in CH<sub>2</sub>Cl<sub>2</sub> : Et<sub>2</sub>O 95:5) as colourless oil (5 mg, 5%).

$[\alpha]_D^{20}$  +9.5 (*c* 0.2 in CHCl<sub>3</sub>). (Enantiomeric ratio could not be determined.)

**<sup>1</sup>H NMR** (500 MHz, CDCl<sub>3</sub>)  $\delta_H$ : 2.24 (3H, s, NCH<sub>3</sub>), 3.05 – 3.11 (1H, m, C(6)*H<sup>A</sup>H<sup>B</sup>*), 3.13 (3H, s, CONCH<sub>3</sub>), 3.22 (1H, ddt, *J* 13.9, 5.6, 1.6 Hz, 1H, m, C(6)*H<sup>A</sup>H<sup>B</sup>*), 3.70 (3H, s, OCH<sub>3</sub>), 3.94 (1H, d, *J* 11.2, C(2)*H*), 3.99 – 4.09 (1H, m, C(3)*H*), 5.05 (1H, d, *J* 12.3, OCH<sup>A</sup>*H<sup>B</sup>*), 5.07 – 5.10 (1H, m, C(8)*H<sup>A</sup>H<sup>B</sup>*), 5.13 (1H, dq, *J* 17.2, 1.7, C(8)*H<sup>A</sup>H<sup>B</sup>*), 5.16 – 5.21 (2H, m, C(5)*H<sub>2</sub>*), 5.24 (1H, d, *J* 12.3, OCH<sup>A</sup>*H<sup>B</sup>*), 5.72 (1H, dddd, *J* 17.2, 10.1, 7.1, 5.6, C(7)*H*), 5.82 (1H, ddd, *J* 17.1, 10.3, 8.1, C(4)*H*), 7.29 – 7.39 (5H, m, 5 × Ar*H*).

**<sup>13</sup>C{<sup>1</sup>H} NMR** (126 MHz, CDCl<sub>3</sub>)  $\delta_C$ : 32.1 (CONCH<sub>3</sub>), 38.1 (NCH<sub>3</sub>), 45.5 (C(3)*H*), 58.0 (C(6)*H<sub>2</sub>*), 61.0 (OCH<sub>3</sub>), 66.2 (OCH<sub>2</sub>), 66.3 (C(2)*H*), 117.4 (C(8)*H<sub>2</sub>*), 117.9 (C(5)*H<sub>2</sub>*), 128.2 (ArC(4)*H*), 128.4 (ArC(2,6 or 3,5)*H*), 128.5 (ArC(2,6 or 3,5)*H*), 134.4 (C(4)*H*), 135.9 (C(7)*H*), 135.9 (ArC(1)), 171.1 (C=O<sub>ester</sub>). C=O<sub>amide</sub> not visible.

**HRMS** (ESI<sup>+</sup>) C<sub>19</sub>H<sub>27</sub>N<sub>2</sub>O<sub>4</sub> [M+H]<sup>+</sup> found 347.1956, requires 347.1965 (–2.6 ppm).

$\nu_{\max}$  (CHCl<sub>3</sub>, cm<sup>-1</sup>) 2978 (C–H), 1722 (C=O<sub>ester</sub>), 1654 (C=O<sub>amide</sub>), 1635 (C=C), 1498 (C=C<sub>Ar</sub>).

## 4. Identified Side Products

### 4.1 (E)-4-(Diisopropylamino)but-2-enoic acid, ethyl ester (22)

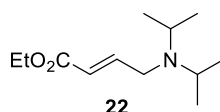

$^1\text{H}$  NMR (400 MHz,  $\text{CDCl}_3$ )  $\delta_{\text{H}}$ : 0.99 (12H, d,  $J$  6.6,  $2 \times \text{CH}(\text{CH}_3)_2$ ), 1.28 (3H, t,  $J$  7.1,  $\text{OCH}_2\text{CH}_3$ ), 3.02 (2H, hept,  $J$  6.6,  $2 \times \text{CH}(\text{CH}_3)_2$ ), 3.23 (2H, dd,  $J$  5.2, 1.9,  $\text{C}(4)\text{H}_2$ ), 4.18 (2H, q,  $J$  7.1,  $\text{OCH}_2\text{CH}_3$ ), 6.04 (1H, dt,  $J$  15.5, 1.9,  $\text{C}(2)\text{H}$ ), 6.98 (1H, dt,  $J$  15.5, 5.2,  $\text{C}(3)\text{H}$ ).

### 4.2 (E)-2-(1,2-Bis(benzylamino)-2-oxoethyl)but-2-enoic acid, ethyl ester (25)

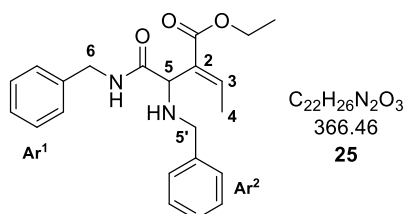

PNP ester **18** (30.0 mg, 0.09 mmol, 1.0 eq) was dissolved in 2.0 mL  $\text{CH}_2\text{Cl}_2$ , benzylamine (48  $\mu\text{L}$ , 0.45 mmol, 5.0 eq) added and the reaction mixture stirred at room temperature overnight. The reaction was quenched by the addition of 1M NaOH, diluted with  $\text{CH}_2\text{Cl}_2$  and the phases separated. The aqueous phase was extracted with  $\text{CH}_2\text{Cl}_2$  ( $3 \times 5$  mL). The combined organic phases were washed with 1M NaOH ( $2 \times 5$  mL), and brine (5 mL), dried over  $\text{MgSO}_4$ , filtered and the solvent removed under reduced pressure. The crude product was purified by silica column chromatography ( $\text{CH}_2\text{Cl}_2$  : EtO 9:1 to  $\text{CH}_2\text{Cl}_2$ :EtO 4:1) to give the title compound as a yellow, glassy solid (10 mg, 30%) as rotameric mixture (6:1).

$^1\text{H}$  NMR (500 MHz,  $\text{CDCl}_3$ ) *major rotamer*  $\delta_{\text{H}}$ : 1.26 (3H, t,  $J$  7.1,  $\text{OCH}_2\text{CH}_3$ ), 1.83 (3H, d,  $J$  7.2,  $\text{C}(4)\text{H}_3$ ), 3.61 (1H, d,  $J$  13.2,  $\text{C}(5')\text{H}^{\text{A}}\text{H}^{\text{B}}$ ), 3.86 (1H, d,  $J$  13.2,  $\text{C}(5')\text{H}^{\text{A}}\text{H}^{\text{B}}$ ), 4.11 (1H, s,  $\text{C}(5)\text{H}$ ), 4.18 (2H, qd,  $J$  7.1, 1.2,  $\text{OCH}_2\text{CH}_3$ ), 4.49 (2H, d,  $J$  6.0,  $\text{C}(6)\text{H}_2$ ), 7.21 – 7.25 (1H, q,  $J$  7.2,  $\text{C}(3)\text{H}$ ), 7.26 – 7.37 (10H, m,  $\text{ArH}$ ), 7.96 (1H, t,  $J$  5.5,  $\text{C}(\text{O})\text{NH}$ ); *minor rotamer (selected)*  $\delta_{\text{H}}$ : 2.13 (3H, d,  $J$  7.2,  $\text{C}(4)\text{H}_3$ ), 3.68 (1H, s,  $\text{C}(5)\text{H}$ ), 4.47 (2H, d,  $J$  6.0,  $\text{C}(6)\text{H}_2$ ), 6.20 (1H, q,  $J$  7.2,  $\text{C}(3)\text{H}$ ), 7.79 (1H, m,  $\text{C}(\text{O})\text{NH}$ ).

$^{13}\text{C}\{^1\text{H}\}$  NMR (126 MHz,  $\text{CDCl}_3$ ) *major rotamer*  $\delta_{\text{C}}$ : 14.1 ( $\text{OCH}_2\text{CH}_3$ ), 14.6 ( $\text{C}(4)\text{H}_3$ ), 43.1 ( $\text{C}(6)\text{H}_2$ ), 51.3 ( $\text{C}(5')\text{H}_2$ ), 57.6 ( $\text{C}(5)\text{H}$ ), 60.7 ( $\text{OCH}_2\text{CH}_3$ ), 127.2 ( $\text{Ar}^1\text{C}(4)\text{H}$ ), 127.3 ( $\text{Ar}^2\text{C}(4)\text{H}$ ), 127.6 ( $\text{Ar}^1\text{C}(2,6)\text{H}$ ), 128.1 ( $\text{Ar}^2\text{C}(2,6)\text{H}$ ), 128.5 ( $\text{Ar}^1\text{C}(3,5)\text{H}$ ), 128.6 ( $\text{Ar}^2\text{C}(3,5)\text{H}$ ), 130.0 ( $\text{C}(2)$ ), 138.7

(Ar<sup>1</sup>C(1)), 139.2 (Ar<sup>2</sup>C(1)), 142.2 (C(3)H), 166.5 (C=O<sub>amide</sub>), 171.7 (C=O<sub>ester</sub>); *minor rotamer (selected)* δ<sub>C</sub>: 16.0 (C(4)H<sub>3</sub>), 66.2 (C(2)H), 143.0 (C(3)H).

**HRMS** (ESI<sup>+</sup>) C<sub>22</sub>H<sub>27</sub>N<sub>2</sub>O<sub>3</sub> [M+H]<sup>+</sup> found 367.2007, requires 367.2016 (−2.5 ppm).

**ν<sub>max</sub>** (CHCl<sub>3</sub>, cm<sup>−1</sup>) 3367 (N-H), 3028 (=C-H), 2980 (C-H), 1699 (C=O<sub>Ester</sub>), 1674 (C=O<sub>Amide</sub>), 1516 (C=O<sub>Amide</sub>), 1496 (C=C<sub>Ar</sub>).

### 4.3 2-(Allyl(methyl)amino)pent-4-enoic acid, benzyl ester (**44**)

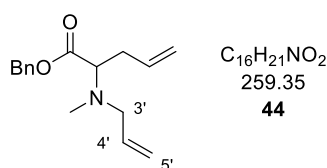

Following General Procedure 1.5, PNP ester **31** (86.0 mg, 0.30 mmol, 1.0 eq), Pd<sub>2</sub>dba<sub>3</sub>·CHCl<sub>3</sub> (7.7 mg, 7.5 μmol, 2.5 mol%), P(2-furyl)<sub>3</sub> (6.9 mg, 30 μmol, 10 mol%), (S)-TM·HCl (14.4 mg, 0.06 mmol, 20 mol%), phosphate **26** (105 mg, 0.37 mmol, 1.25 eq) and *i*Pr<sub>2</sub>NEt (125 μL, 0.7 mmol, 2.4 eq) in MeCN (5.0 mL) gave the crude product, which was used directly for derivatisation with NaOBn (0.45 mL, 0.45 mmol, 1.5 eq) in THF (6.0 mL). Subsequent purification of the crude derivatised product via silica column chromatography (CH<sub>2</sub>Cl<sub>2</sub> to CH<sub>2</sub>Cl<sub>2</sub>:Et<sub>2</sub>O 95:5, R<sub>f</sub> 0.44 in CH<sub>2</sub>Cl<sub>2</sub>:Et<sub>2</sub>O 95:5) afforded the title compound as yellow glassy solid (10 mg, 13%).

**<sup>1</sup>H NMR** (500 MHz, CDCl<sub>3</sub>) δ<sub>H</sub>: 2.31 (3H, s, NCH<sub>3</sub>), 2.41 (1H, dtt, *J* 14.1, 6.9, 1.4, C(3)H<sup>A</sup>H<sup>B</sup>), 2.53 (1H, dddt, *J* 14.2, 8.3, 7.1, 1.3, C(3)H<sup>A</sup>H<sup>B</sup>), 3.10 (1H, ddt, *J* 13.8, 6.9, 1.2, C(3')H<sup>A</sup>H<sup>B</sup>), 3.22 (1H, ddt, *J* 13.8, 5.9, 1.5, C(3')H<sup>A</sup>H<sup>B</sup>), 3.43 (1H, dd, *J* 8.1, 7.0, C(2)H), 5.00 – 5.18 (6H, m, OCH<sub>2</sub>, C(5)H<sub>2</sub>, C(5')H<sub>2</sub>), 5.72 – 5.84 (2H, m, C(4)H, C(4')H), 7.29 – 7.38 (5H, m, 5 × ArH).

**<sup>13</sup>C{<sup>1</sup>H} NMR** (126 MHz, CDCl<sub>3</sub>) δ<sub>C</sub>: 34.1 (C(3)H<sub>2</sub>), 37.8 (NCH<sub>3</sub>), 57.5 (C(3')H<sub>2</sub>), 65.4 (C(2)H), 65.9 (OCH<sub>2</sub>), 117.1 (C(5)H<sub>2</sub>), 117.4 (C(5')H<sub>2</sub>), 128.2 (ArC(4)H), 128.4 (ArC(2,6)H), 128.5 (ArC(3,5)H), 134.5 (C(4)H), 135.9 (C(4')H, ArC(1)), 171.8 (C=O).

## 5. Determination of Product Configuration

### 5.1 X-ray single crystal analysis

X-ray diffraction data were collected at 125 K using a Rigaku MM-007HF High Brilliance RA generator/confocal optics with XtaLAB P200 diffractometer [Cu K $\alpha$  radiation ( $\lambda$  = 1.54187 Å)]. Data were collected using CrystalClear<sup>1</sup> and processed (including correction for Lorentz, polarization and absorption) using CrysAlisPro.<sup>2</sup> Structures were solved by dual-space (SHELXT<sup>3</sup>), direct (SIR2011<sup>4</sup>) or charge-flipping (Superflip<sup>5</sup>) methods and refined by full-matrix least-squares against  $F^2$  (SHELXL-2018/3<sup>6</sup>). Non-hydrogen atoms were refined anisotropically, and all hydrogen atoms were refined using a riding model. All calculations were performed using the CrystalStructure<sup>7</sup> interface.

Data for **28<sub>maj</sub>**

|                                                             | <b>28<sub>maj</sub></b>                                       | 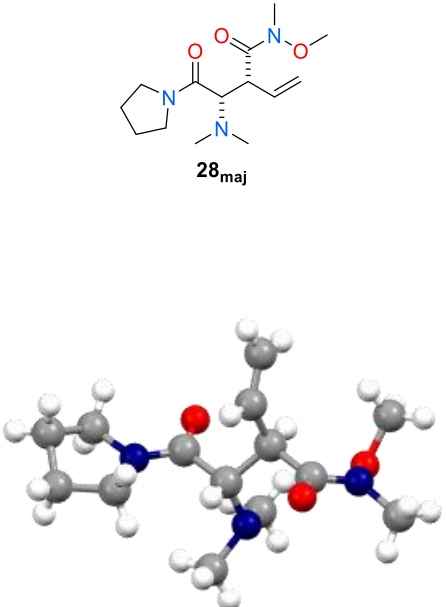 |
|-------------------------------------------------------------|---------------------------------------------------------------|-------------------------------------------------------------------------------------|
| CCDC                                                        | 2000698                                                       |                                                                                     |
| empirical formula                                           | C <sub>14</sub> H <sub>25</sub> N <sub>3</sub> O <sub>3</sub> |                                                                                     |
| fw                                                          | 283.37                                                        |                                                                                     |
| crystal description                                         | colourless, plate                                             |                                                                                     |
| crystal size [mm]                                           | 0.100 × 0.050 × 0.020                                         |                                                                                     |
| space group                                                 | C2/c (#15)                                                    |                                                                                     |
| <i>a</i> [Å]                                                | 20.9650(8)                                                    |                                                                                     |
| <i>b</i> [Å]                                                | 6.25949(18)                                                   |                                                                                     |
| <i>c</i> [Å]                                                | 23.5608(11)                                                   |                                                                                     |
| vol [Å <sup>3</sup> ]                                       | 3022.0(2)                                                     |                                                                                     |
| $\beta$ [°]                                                 | 102.201(4)                                                    |                                                                                     |
| <i>Z</i>                                                    | 8                                                             |                                                                                     |
| $\rho$ (calc) [g/cm <sup>3</sup> ]                          | 1.246                                                         |                                                                                     |
| $\mu$ [mm <sup>-1</sup> ]                                   | 0.718                                                         |                                                                                     |
| <i>F</i> (000)                                              | 1232.00                                                       |                                                                                     |
| reflections collected                                       | 16059                                                         |                                                                                     |
| independent reflections ( <i>R</i> <sub>int</sub> )         | 3076 (0.0711)                                                 |                                                                                     |
| data/parameters                                             | 3076/181                                                      |                                                                                     |
| GOF on <i>F</i> <sup>2</sup>                                | 1.035                                                         |                                                                                     |
| <i>R</i> <sub>1</sub> [ <i>I</i> > 2 $\sigma$ ( <i>I</i> )] | 0.0951                                                        |                                                                                     |
| <i>wR</i> <sub>2</sub> (all data)                           | 0.2765                                                        |                                                                                     |
| largest diff. peak/hole [e/Å <sup>3</sup> ]                 | 0.84, -0.50                                                   |                                                                                     |

<sup>1</sup> CrystalClear-SM Expert v2.1. Rigaku Americas, The Woodlands, Texas, USA, and Rigaku Corporation, Tokyo, Japan, 2015

<sup>2</sup> CrysAlisPro v1.171.38.46. Rigaku Oxford Diffraction, Rigaku Corporation, Oxford, U.K. 2015

<sup>3</sup> G. M. Sheldrick, *Acta Crystallogr., Sect. A* **2015**, 71, 3–8.

<sup>4</sup> M. C. Burla, R. Calandro, M. Camalli, B. Carrozzini, G. L. Cascarano, C. Giacovazzo, M. Mallamo, A. Mazzzone, G. Polidori, R. Spagna, *J. Appl. Cryst.* **2012**, 45, 357–361.

<sup>5</sup> Palatinus, L. Chapuis, G. J. *Appl. Cryst.* **2007**, 40, 786–790.

<sup>6</sup> G. M. Sheldrick, *Acta Crystallogr., Sect. C* **2015**, 71, 3–8.

<sup>7</sup> CrystalStructure v4.3.0. Rigaku Americas, The Woodlands, Texas, USA, and Rigaku Corporation, Tokyo, Japan, 2018.

## Data for (E)-37

| (E)-37                                              |                                                               | 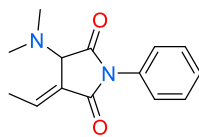 |
|-----------------------------------------------------|---------------------------------------------------------------|-------------------------------------------------------------------------------------|
|                                                     |                                                               |                                                                                     |
| CCDC                                                | 2000699                                                       |                                                                                     |
| empirical formula                                   | C <sub>14</sub> H <sub>16</sub> N <sub>2</sub> O <sub>2</sub> |                                                                                     |
| fw                                                  | 244.29                                                        |                                                                                     |
| crystal description                                 | colourless, prism                                             |                                                                                     |
| crystal size [mm]                                   | 0.200 × 0.100 × 0.050                                         |                                                                                     |
| space group                                         | P-1(#2)                                                       |                                                                                     |
| <i>a</i> [Å]                                        | 8.1528(2)                                                     |                                                                                     |
| <i>b</i> [Å]                                        | 9.51231(16)                                                   |                                                                                     |
| <i>c</i> [Å]                                        | 16.9230(4)                                                    |                                                                                     |
| vol [Å] <sup>3</sup>                                | 1256.30(5)                                                    |                                                                                     |
| <i>α</i> [°]                                        | 101.2680(17)                                                  |                                                                                     |
| <i>β</i> [°]                                        | 92.223(2)                                                     |                                                                                     |
| <i>γ</i> [°]                                        | 101.6720(18)                                                  |                                                                                     |
| <i>Z</i>                                            | 4                                                             |                                                                                     |
| <i>ρ</i> (calc) [g/cm <sup>3</sup> ]                | 1.291                                                         |                                                                                     |
| <i>μ</i> [mm <sup>-1</sup> ]                        | 0.709                                                         |                                                                                     |
| F(000)                                              | 520.00                                                        |                                                                                     |
| reflections collected                               | 13192                                                         |                                                                                     |
| independent reflections ( <i>R</i> <sub>int</sub> ) | 4892 (0.0154)                                                 |                                                                                     |
| data/parameters                                     | 4892/332                                                      |                                                                                     |
| GOF on <i>F</i> <sup>2</sup>                        | 1.064                                                         |                                                                                     |
| <i>R</i> <sub>1</sub> [ <i>I</i> > 2σ( <i>I</i> )]  | 0.0415                                                        |                                                                                     |
| <i>wR</i> <sub>2</sub> (all data)                   | 0.1093                                                        |                                                                                     |
| largest diff. peak/hole [e/Å <sup>3</sup> ]         | 0.25, -0.27                                                   |                                                                                     |



Data for **40<sub>min</sub>**

|                                                             | <b>40<sub>min</sub></b>                                       |  |
|-------------------------------------------------------------|---------------------------------------------------------------|--|
| CCDC                                                        | 2000700                                                       |  |
| empirical formula                                           | C <sub>19</sub> H <sub>26</sub> N <sub>2</sub> O <sub>3</sub> |  |
| fw                                                          | 330.42                                                        |  |
| crystal description                                         | colourless, prism                                             |  |
| crystal size [mm]                                           | 0.110 × 0.090 × 0.080                                         |  |
| space group                                                 | P1(#1)                                                        |  |
| <i>a</i> [Å]                                                | 5.95743(14)                                                   |  |
| <i>b</i> [Å]                                                | 7.72174(8)                                                    |  |
| <i>c</i> [Å]                                                | 10.83510(9)                                                   |  |
| vol [Å] <sup>3</sup>                                        | 445.939(13)                                                   |  |
| $\alpha$ [°]                                                | 101.1780(7)                                                   |  |
| $\beta$ [°]                                                 | 97.4202(15)                                                   |  |
| $\gamma$ [°]                                                | 110.9130(17)                                                  |  |
| <i>Z</i>                                                    | 1                                                             |  |
| $\rho$ (calc) [g/cm <sup>3</sup> ]                          | 1.230                                                         |  |
| $\mu$ [mm <sup>-1</sup> ]                                   | 0.670                                                         |  |
| <i>F</i> (000)                                              | 178.00                                                        |  |
| reflections collected                                       | 11042                                                         |  |
| independent reflections ( <i>R</i> <sub>int</sub> )         | 3250 (0.0232)                                                 |  |
| data/parameters                                             | 3250/237                                                      |  |
| GOF on <i>F</i> <sup>2</sup>                                | 1.071                                                         |  |
| <i>R</i> <sub>1</sub> [ <i>I</i> > 2 $\sigma$ ( <i>I</i> )] | 0.0315                                                        |  |
| <i>wR</i> <sub>2</sub> (all data)                           | 0.0855                                                        |  |
| largest diff. peak/hole [e/Å <sup>3</sup> ]                 | 0.15, -0.15                                                   |  |
| Flack parameter                                             | 0.08(9)                                                       |  |

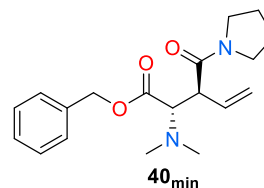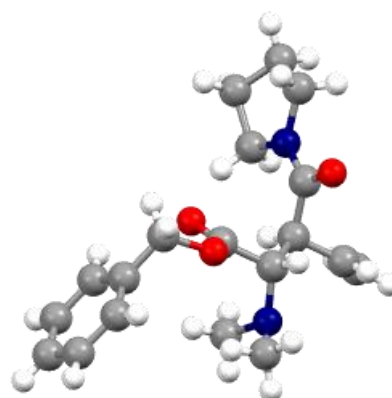

## 5.2 NOE Experiment

Experiments were performed on a 400 MHz spectrometer. For each experiment, a <sup>1</sup>H NMR spectrum was obtained and a NOE was obtained on the same NMR spectrometer with a selective pulse at the required chemical shift to 4 decimal places obtained from MestreNova 9.1 without referencing to solvent.

Determination of alkene configuration for **25**:

Amide **25** (approx. 10 mg) was dissolved in CDCl<sub>3</sub> (approx. 0.6 mL) and a <sup>1</sup>H NMR spectrum was obtained. The chemical shift of the alkene CH<sub>3</sub> signal (C(4)**H**<sub>3</sub>,  $\delta_{\text{H}}$  1.8570 ppm, uncorrected) was determined and subsequently irradiated on the same NMR spectrometer. The resulting spectrum showed significant radiation transfer to protons with chemical shifts of 4.13 ppm (s, C(5)**H**) and 7.20–7.31 ppm (m, C(3)**H**). Then, the chemical shift of the C(5)**H** signal (C(5)**H**,  $\delta_{\text{H}}$  4.1359 ppm, uncorrected) was determined and irradiated on the same NMR

spectrometer. The resulting spectrum showed significant radiation transfer to protons with chemical shifts of 1.86 (d,  $J$  7.2 Hz, C(4)H<sub>3</sub>) and 3.64 (d,  $J$  13.2 Hz, C(5')H<sub>2</sub>).

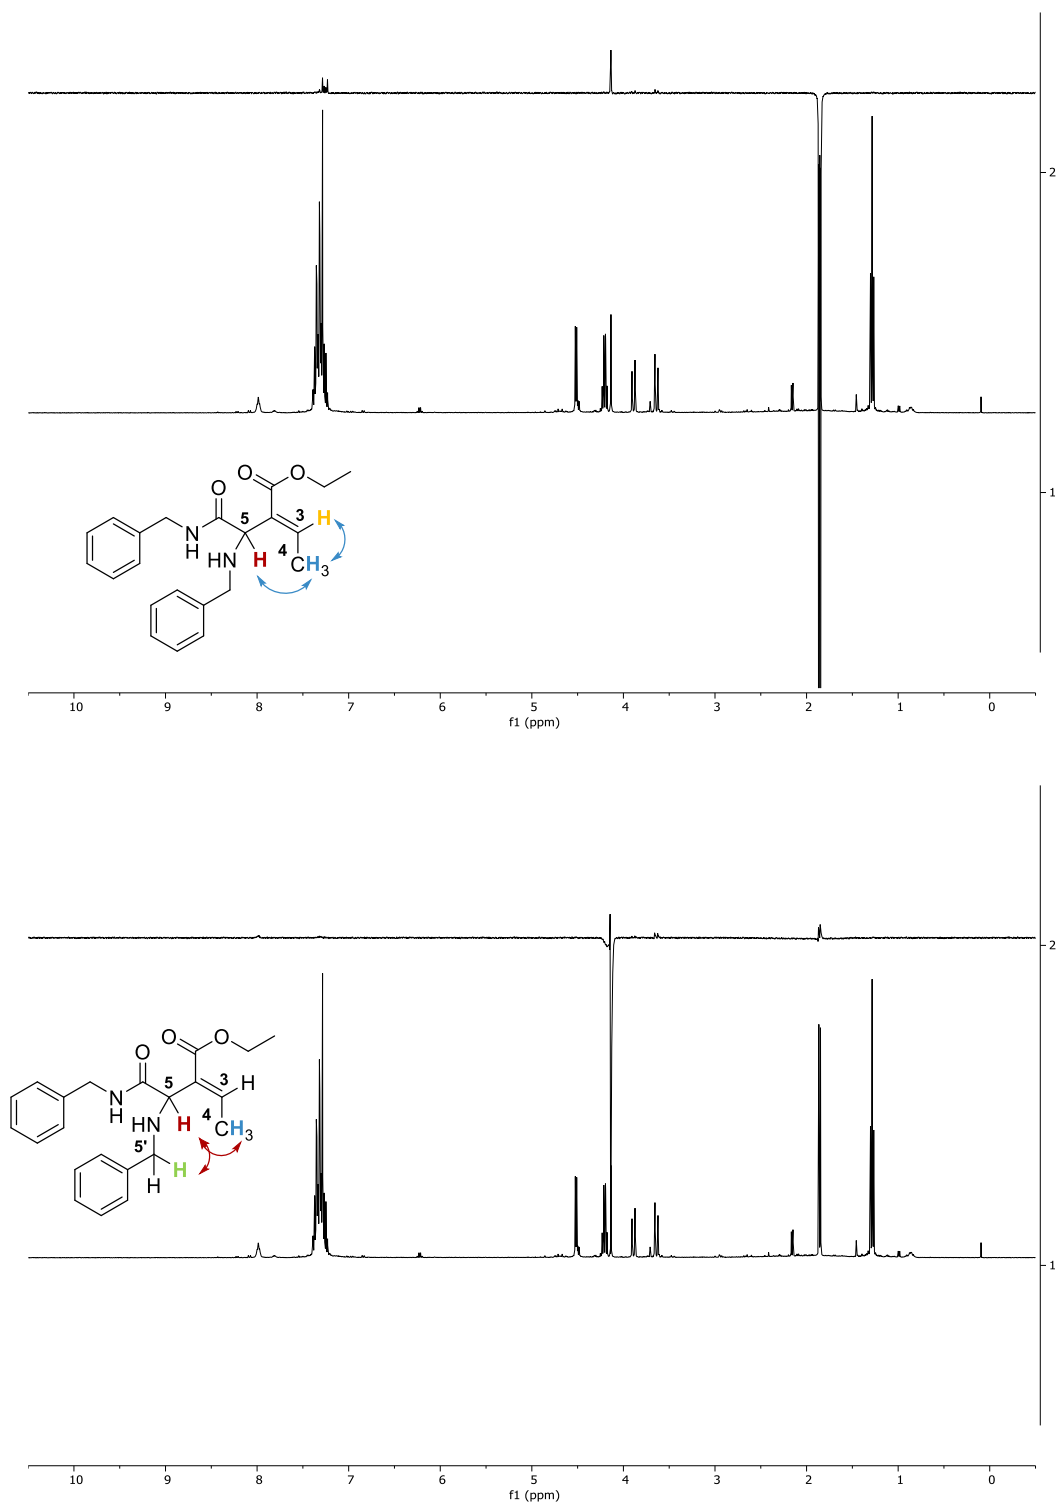

Figure S1: NOE spectra for 25. <sup>1</sup>H NMR, CDCl<sub>3</sub>, 400 MHz



## 6. References

- (1) Daniels, D.; Smith, S.; Lebl, T.; Shapland, P.; Smith, A. A Scalable, Chromatography-Free Synthesis of Benzotetramisole. *Synthesis (Stuttg)*. **2014**, 47 (01), 34–41. <https://doi.org/10.1055/s-0034-1378931>.
- (2) Spoehrle, S. S. M.; West, T. H.; Taylor, J. E.; Slawin, A. M. Z.; Smith, A. D. Tandem Palladium and Isothiourea Relay Catalysis: Enantioselective Synthesis of  $\alpha$ -Amino Acid Derivatives via Allylic Amination and [2,3]-Sigmatropic Rearrangement. *J. Am. Chem. Soc.* **2017**, 139 (34), 11895–11902. <https://doi.org/10.1021/jacs.7b05619>.
- (3) Ronson, T. O.; Carney, J. R.; Whitwood, A. C.; Taylor, R. J. K.; Fairlamb, I. J. S. AsCat and FurCat: New Pd Catalysts for Selective Room-Temperature Stille Cross-Couplings of Benzyl Chlorides with Organostannanes. *Chem. Commun.* **2015**, 51 (16), 3466–3469. <https://doi.org/10.1039/C4CC09810B>.
- (4) Zalesskiy, S. S.; Ananikov, V. P. Pd 2(Dba) 3 as a Precursor of Soluble Metal Complexes and Nanoparticles: Determination of Palladium Active Species for Catalysis and Synthesis. *Organometallics* **2012**, 31 (6), 2302–2309. <https://doi.org/10.1021/om201217r>.
- (5) Hutchings-Goetz, L.; Yang, C.; Snaddon, T. N. Enantioselective  $\alpha$ -Allylation of Aryl Acetic Acid Esters via C1-Ammonium Enolate Nucleophiles: Identification of a Broadly Effective Palladium Catalyst for Electron-Deficient Electrophiles. *ACS Catal.* **2018**, 8 (11), 10537–10544. <https://doi.org/10.1021/acscatal.8b03507>.
- (6) Matviitsuk, A.; Greenhalgh, M. D.; Antúnez, D.-J. B.; Slawin, A. M. Z.; Smith, A. D. Aryloxide-Facilitated Catalyst Turnover in Enantioselective  $\alpha,\beta$ -Unsaturated Acyl Ammonium Catalysis. *Angew. Chem., Int. Ed.* **2017**, 56 (40), 12282–12287. <https://doi.org/10.1002/anie.201706402>.
- (7) Jacobi, P. A.; Blum, C. A.; DeSimone, R. W.; Udodong, U. E. S. Bis-Heteroannulation. 15. Enantiospecific Syntheses of (+)- and (-)-Norsecurinine. *J. Am. Chem. Soc.* **1991**, 113 (14), 5384–5392. <https://doi.org/10.1021/ja00014a033>.
- (8) Abraham, E.; Cooke, J. W. B.; Davies, S. G.; Naylor, A.; Nicholson, R. L.; Price, P. D.; Smith, A. D. Asymmetric Synthesis of 4-Amino- $\gamma$ -Butyrolactones via Lithium Amide Conjugate Addition. *Tetrahedron* **2007**, 63 (26), 5855–5872. <https://doi.org/10.1016/j.tet.2007.03.026>.

- (9) Tian, G.-Q.; Yang, J.; Rosa-Perez, K.  $\gamma$ -Oxygenation of  $\alpha,\beta$ -Unsaturated Esters by Vinylogous O -Nitroso Mukaiyama Aldol Reaction. *Org. Lett.* **2010**, 12 (21), 5072–5074. <https://doi.org/10.1021/ol1021433>.
- (10) Kacprzyński, M. A.; Kazane, S. A.; May, T. L.; Hoveyda, A. H. Cu-Catalyzed Asymmetric Conjugate Additions of Dialkyl- and Diarylzinc Reagents to Acyclic  $\beta$ -Silyl- $\alpha,\beta$ -Unsaturated Ketones. Synthesis of Allylsilanes in High Diastereo- and Enantiomeric Purity. *Org. Lett.* **2007**, 9 (16), 3187–3190. <https://doi.org/10.1021/ol071331k>.
- (11) Yang, Q.; Njardarson, J. T.; Draghici, C.; Li, F. Total Synthesis of Vinigrol. *Angew. Chem., Int. Ed.* **2013**, 52 (33), 8648–8651. <https://doi.org/10.1002/anie.201304624>.
- (12) Hwu, J. R.; Furth, P. S. Silicon-Directed Decarbonylation of Trimethylsilyl  $\beta$ ,  $\gamma$ -Enals by Photolysis. *J. Am. Chem. Soc.* **1989**, 111 (24), 8834–8841. <https://doi.org/10.1021/ja00206a011>.
- (13) Shintani, R.; Takatsu, K.; Takeda, M.; Hayashi, T. Copper-Catalyzed Asymmetric Allylic Substitution of Allyl Phosphates with Aryl- and Alkenylboronates. *Angew. Chem., Int. Ed.* **2011**, 50 (37), 8656–8659. <https://doi.org/10.1002/anie.201103581>.
- (14) Yoshimura, Y.; Yamazaki, Y.; Kawahata, M.; Yamaguchi, K.; Takahata, H. Design and Synthesis of a Novel Ring-Expanded 4'-Thio-Apio-Nucleoside Derivatives. *Tetrahedron Lett.* **2007**, 48 (26), 4519–4522. <https://doi.org/10.1016/j.tetlet.2007.04.139>.
- (15) Schwarz, K. J.; Pearson, C. M.; Cintron-Rosado, G. A.; Liu, P.; Snaddon, T. N. Traversing Steric Limitations by Cooperative Lewis Base/Palladium Catalysis: An Enantioselective Synthesis of  $\alpha$ -Branched Esters Using 2-Substituted Allyl Electrophiles. *Angew. Chem., Int. Ed.* **2018**, 57 (26), 7800–7803. <https://doi.org/10.1002/anie.201803277>.
- (16) Mailig, M.; Hazra, A.; Armstrong, M. K.; Lalic, G. Catalytic Anti-Markovnikov Hydroallylation of Terminal and Functionalized Internal Alkynes: Synthesis of Skipped Dienes and Trisubstituted Alkenes. *J. Am. Chem. Soc.* **2017**, 139 (20), 6969–6977. <https://doi.org/10.1021/jacs.7b02104>.
- (17) Jacobi, P. A.; Blum, C. A.; DeSimone, R. W.; Udodong, U. E. S. Total Synthesis of (+)- and (–)-Norsecurinine. *Tetrahedron Lett.* **1989**, 30 (51), 7173–7176. [https://doi.org/10.1016/S0040-4039\(01\)93926-7](https://doi.org/10.1016/S0040-4039(01)93926-7).
- (18) Abdou, A. M.; Botros, S.; Hassan, R. A.; Kamel, M. M.; Taber, D. F.; Taher, A. T. Useful

- Four-Carbon Synthons En Route to Monastrol Analogs. *Tetrahedron* **2015**, 71 (1), 139–146. <https://doi.org/10.1016/j.tet.2014.11.022>.
- (19) Yang, Z.; Ma, M.; Yang, C.-H.; Gao, Y.; Zhang, Q.; Chen, Y. Determination of the Absolute Configurations of Microtermolides A and B. *J. Nat. Prod.* **2016**, 79 (9), 2408–2412. <https://doi.org/10.1021/acs.jnatprod.5b01143>.

## Appendix I. Proposed Mechanisms for the Formation of Side Products

### Proposed Mechanism for the Formation of 25

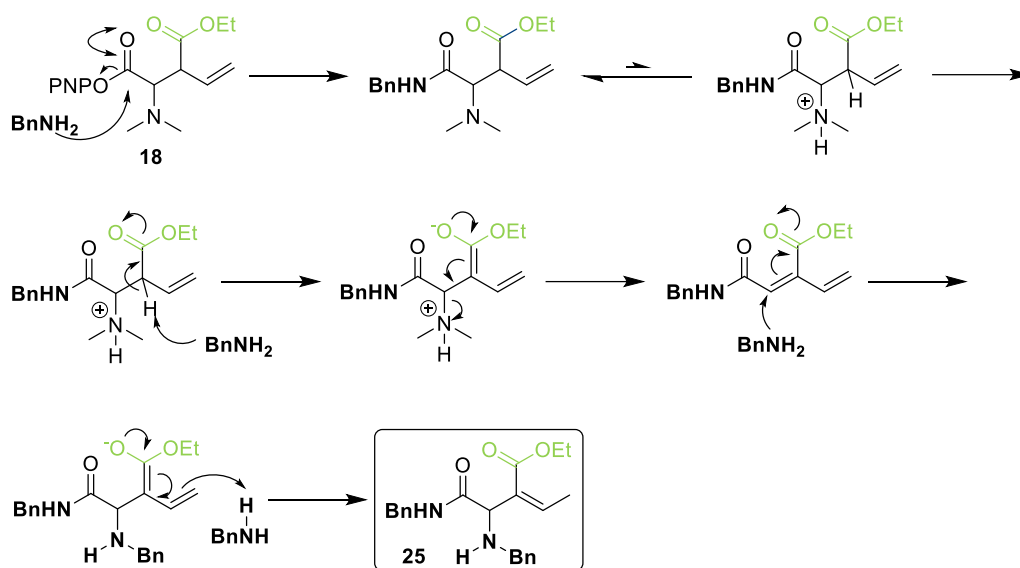

Figure A1: Proposed mechanism for the formation of 25

### Proposed Mechanism for the Formation of 37

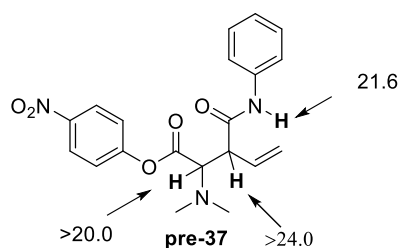

Imide **37** is proposed to be formed by intramolecular cyclisation of **pre-37**, formed *in situ* from the allylation/[2,3]-rearrangement sequence. Rough estimations of pKa values in DMSO for most acidic protons in **pre-37** based on values taken from Evan's pKa table<sup>8</sup> suggest that deprotonation of N-H is feasible under the reaction conditions.

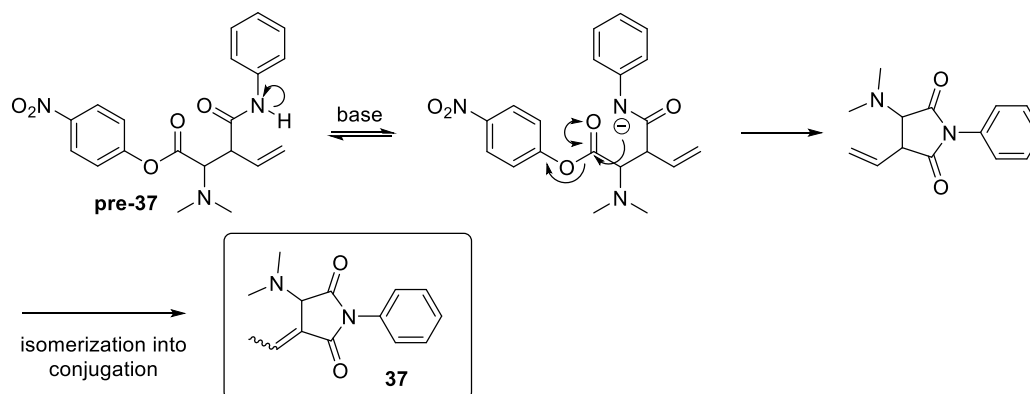

Figure A2: Proposed mechanism for the formation of 37

<sup>8</sup> Evan's pKa Table, [http://evans.rc.fas.harvard.edu/pdf/evans\\_pKa\\_table.pdf](http://evans.rc.fas.harvard.edu/pdf/evans_pKa_table.pdf) (accessed: 01.05.2020)

## Proposed Mechanism for the Formation of **44**

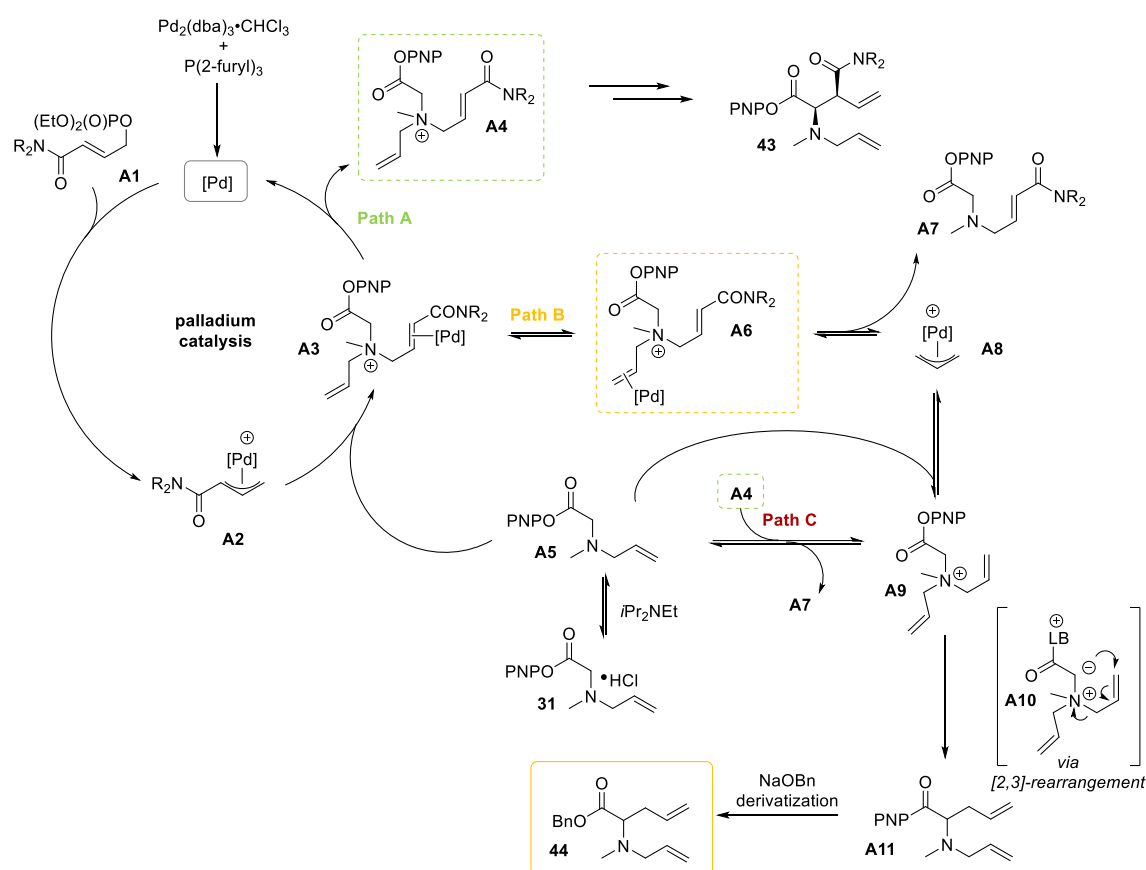

Figure A3: Proposed mechanism for the formation of **44**. Counterions are omitted for simplification.

The presence of a *N*-methyl-*N*-allyl group in PNP ester **31** opens the possibility for the reaction to proceed in different pathways once the intermediate ammonium salt **A3** is formed. Path A follows the anticipated pathway for the allylation/[2,3]-rearrangement sequence, yielding intermediate ammonium salt **A4**, which upon rearrangement gives the desired product **43**. However, due to the proximity of the *N*-substituents in **A3** it is plausible that, once the palladium catalyst dissociates from the amide containing allylic fragment, it coordinates to the unsubstituted allylic fragment (**A6**, Path B). As the nucleophilic substitution step is reversible,  $\text{Pd}-\pi$ -allyl complex **A8** can form. This step also produces **A7** as an unproductive side product, however, this could not be isolated. The unsubstituted  $\text{Pd}-\pi$ -allyl complex **A8** can react with another molecule of PNP ester **A5**, giving ammonium salt **A9** bearing two unsubstituted allyl fragments. It is also conceivable that **A9** can be obtained from an uncatalyzed nucleophilic substitution of ammonium salt **A4** with a molecule of PNP ester **A5** (Path C). [2,3]-rearrangement of ylide **A10** formed from ammonium salt **A9** will lead to PNP ester **A11**, which upon derivatization with  $\text{NaOBn}$  gives the observed side product **44**.

## Appendix II. $^1\text{H}$ , $^{13}\text{C}\{^1\text{H}\}$ and $^{31}\text{P}\{^1\text{H}\}$ NMR Spectra of Novel Compounds

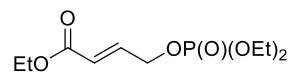

<sup>1</sup>H, CDCl<sub>3</sub>, 400 MHz

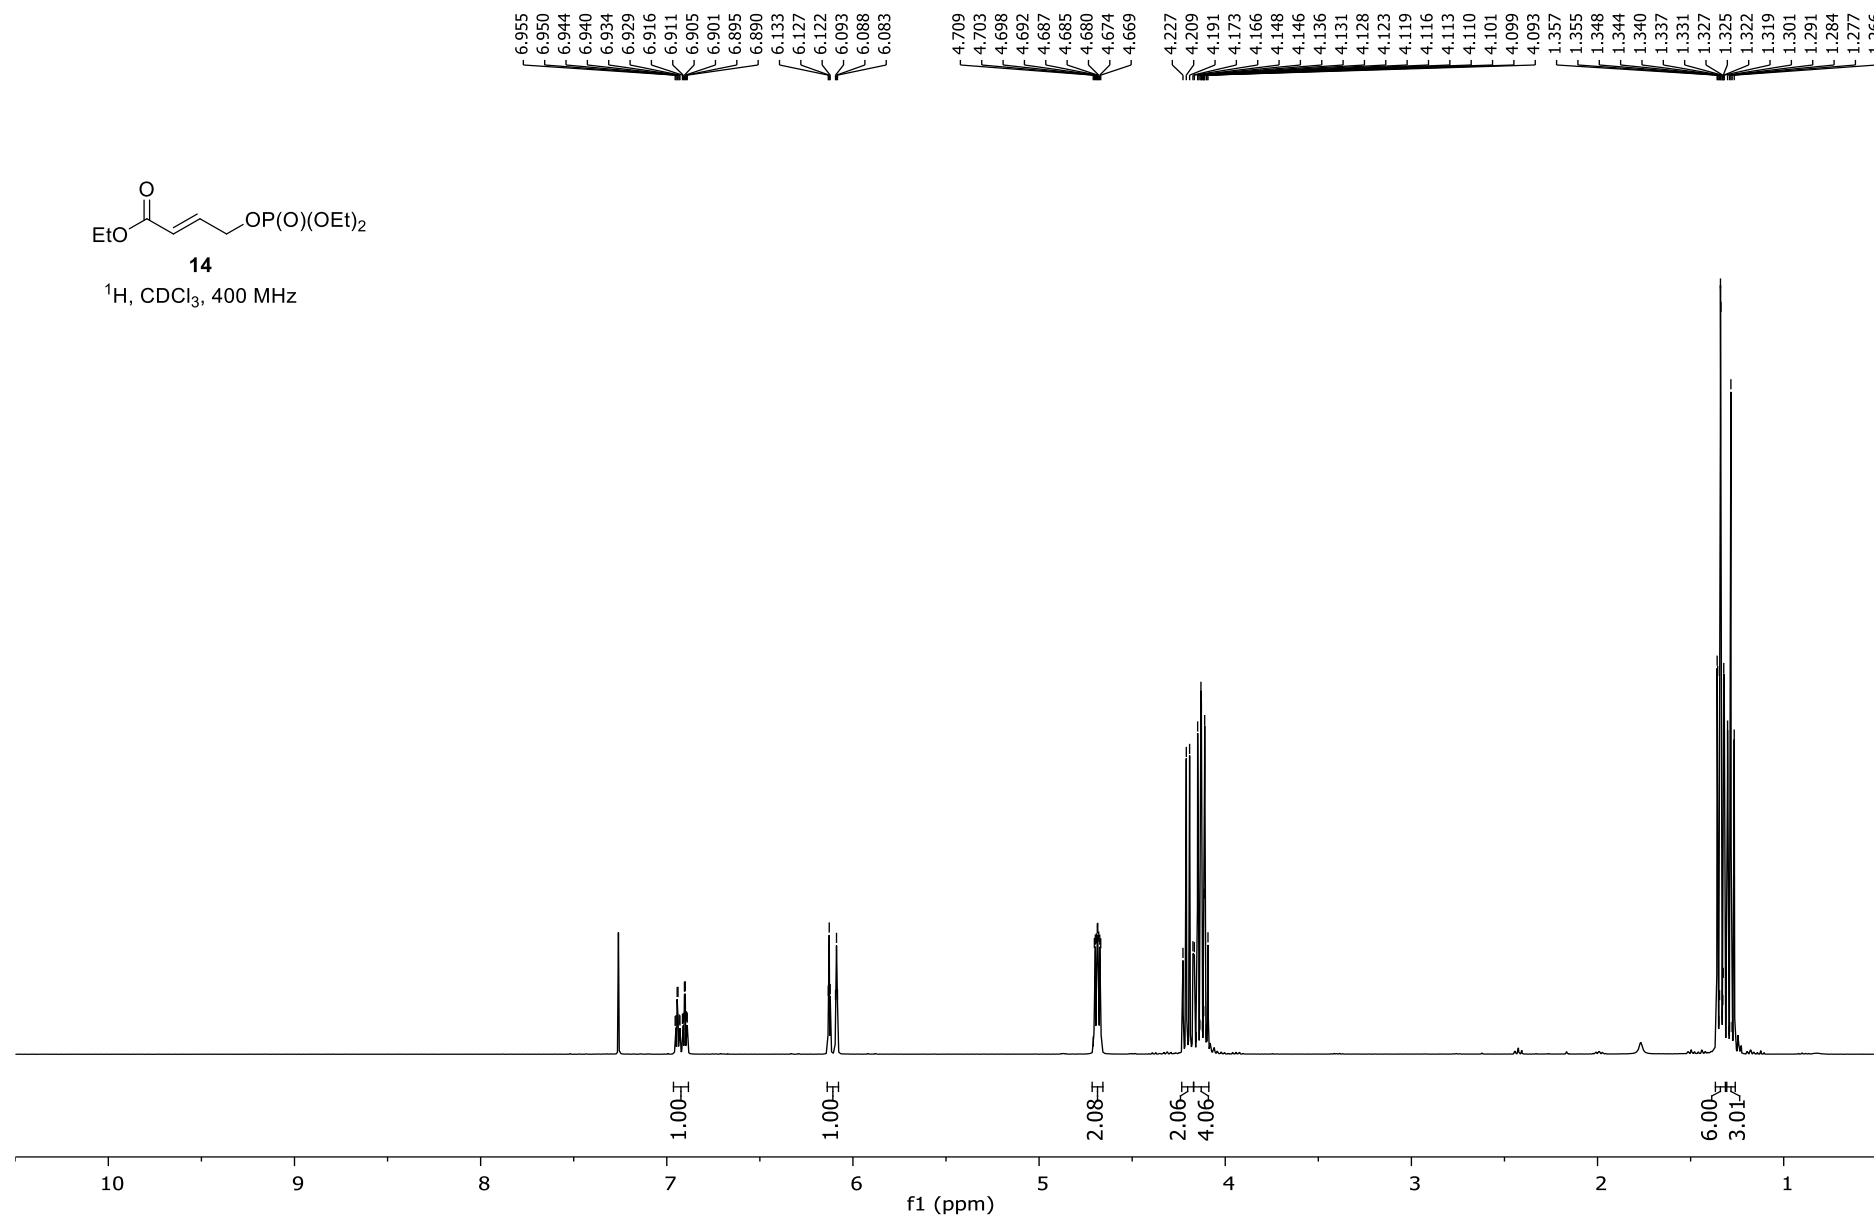

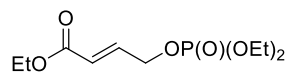

**14**

$^{13}\text{C}\{^1\text{H}\}$ ,  $\text{CDCl}_3$ , 126 MHz

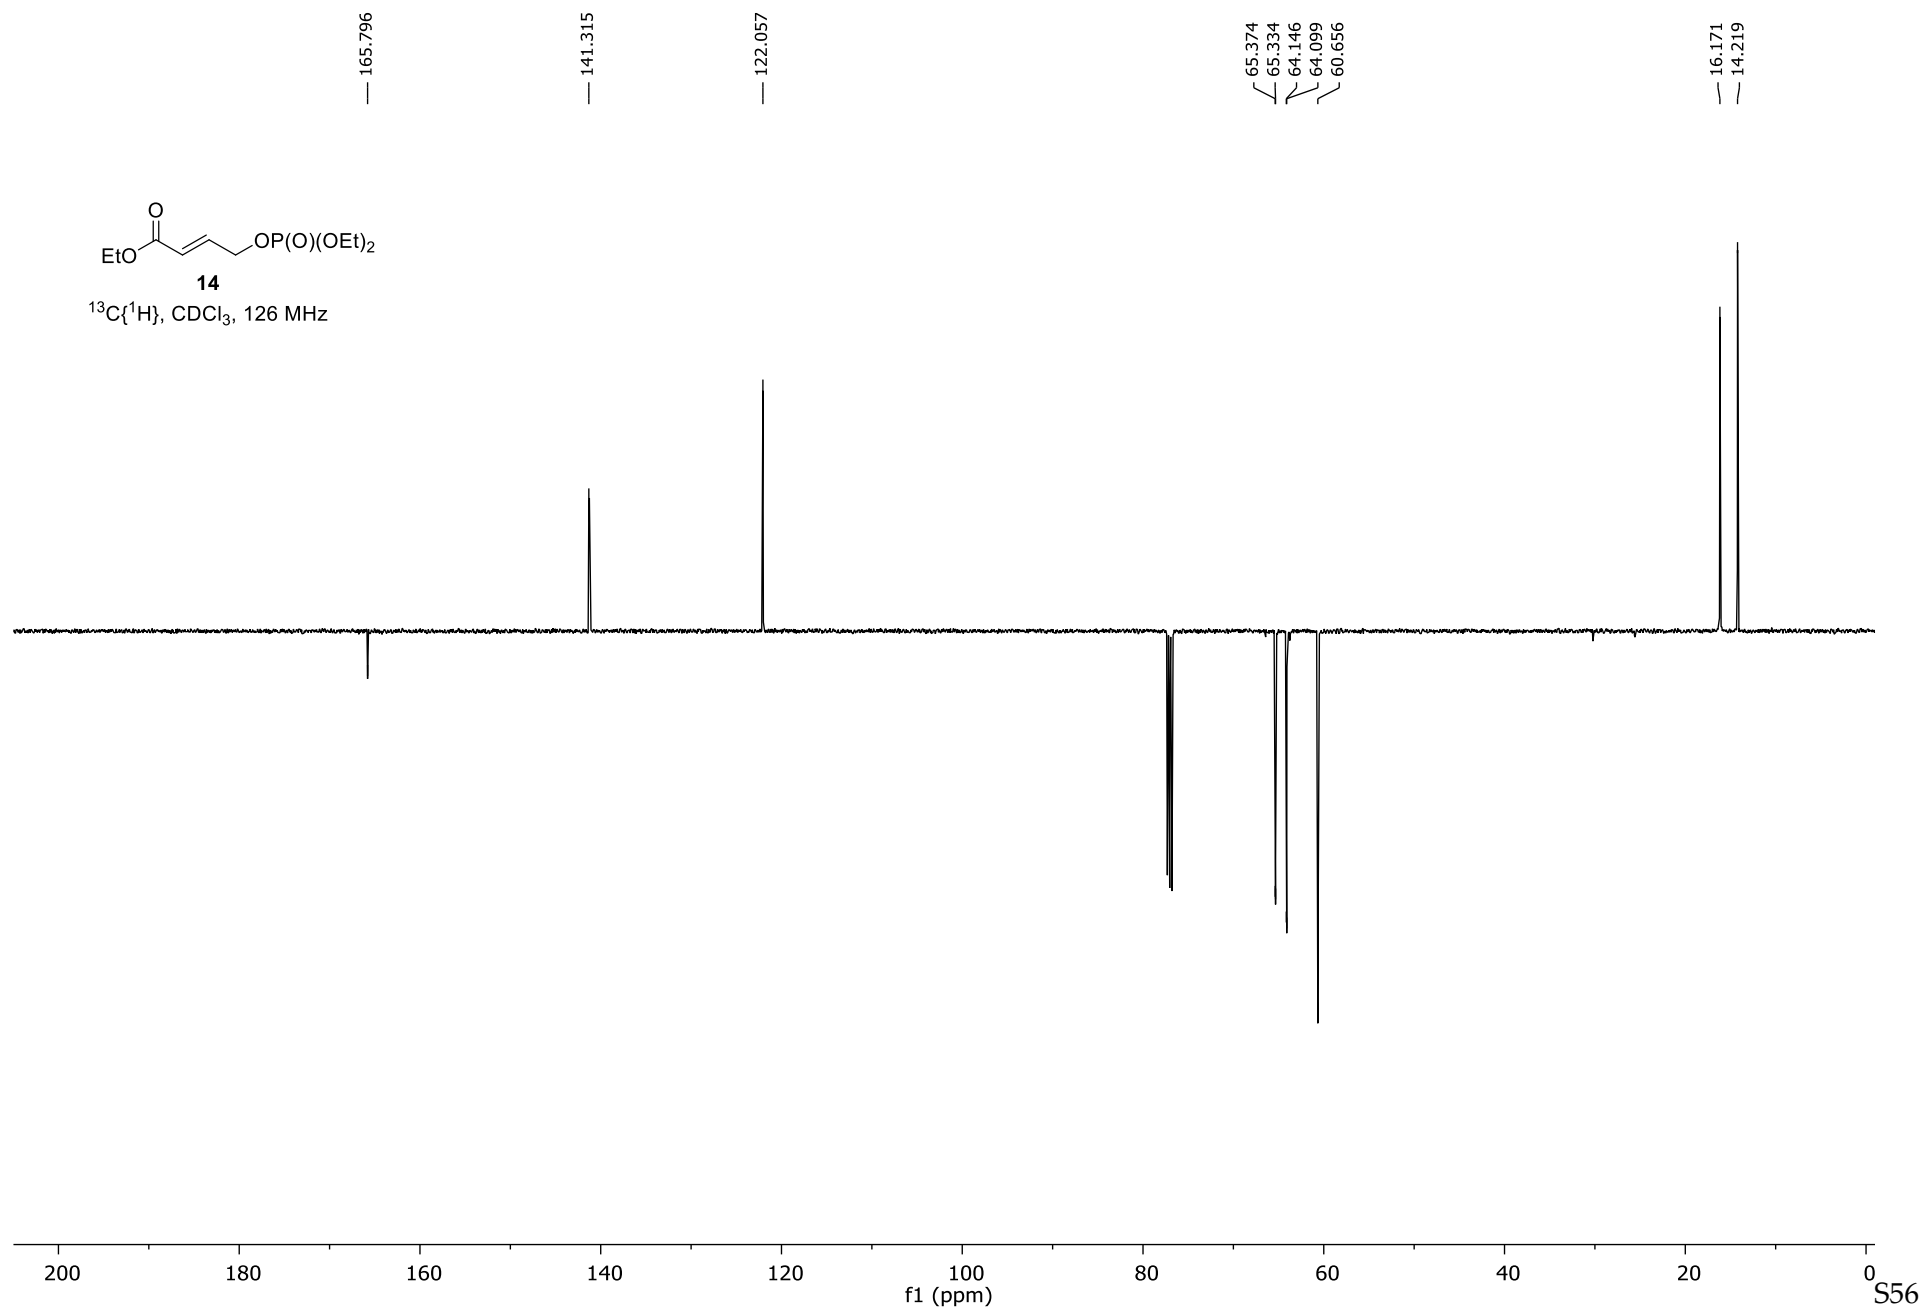



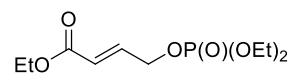

**14**

$^{31}\text{P}\{^1\text{H}\}$ ,  $\text{CDCl}_3$ , 162 MHz

— -1.098

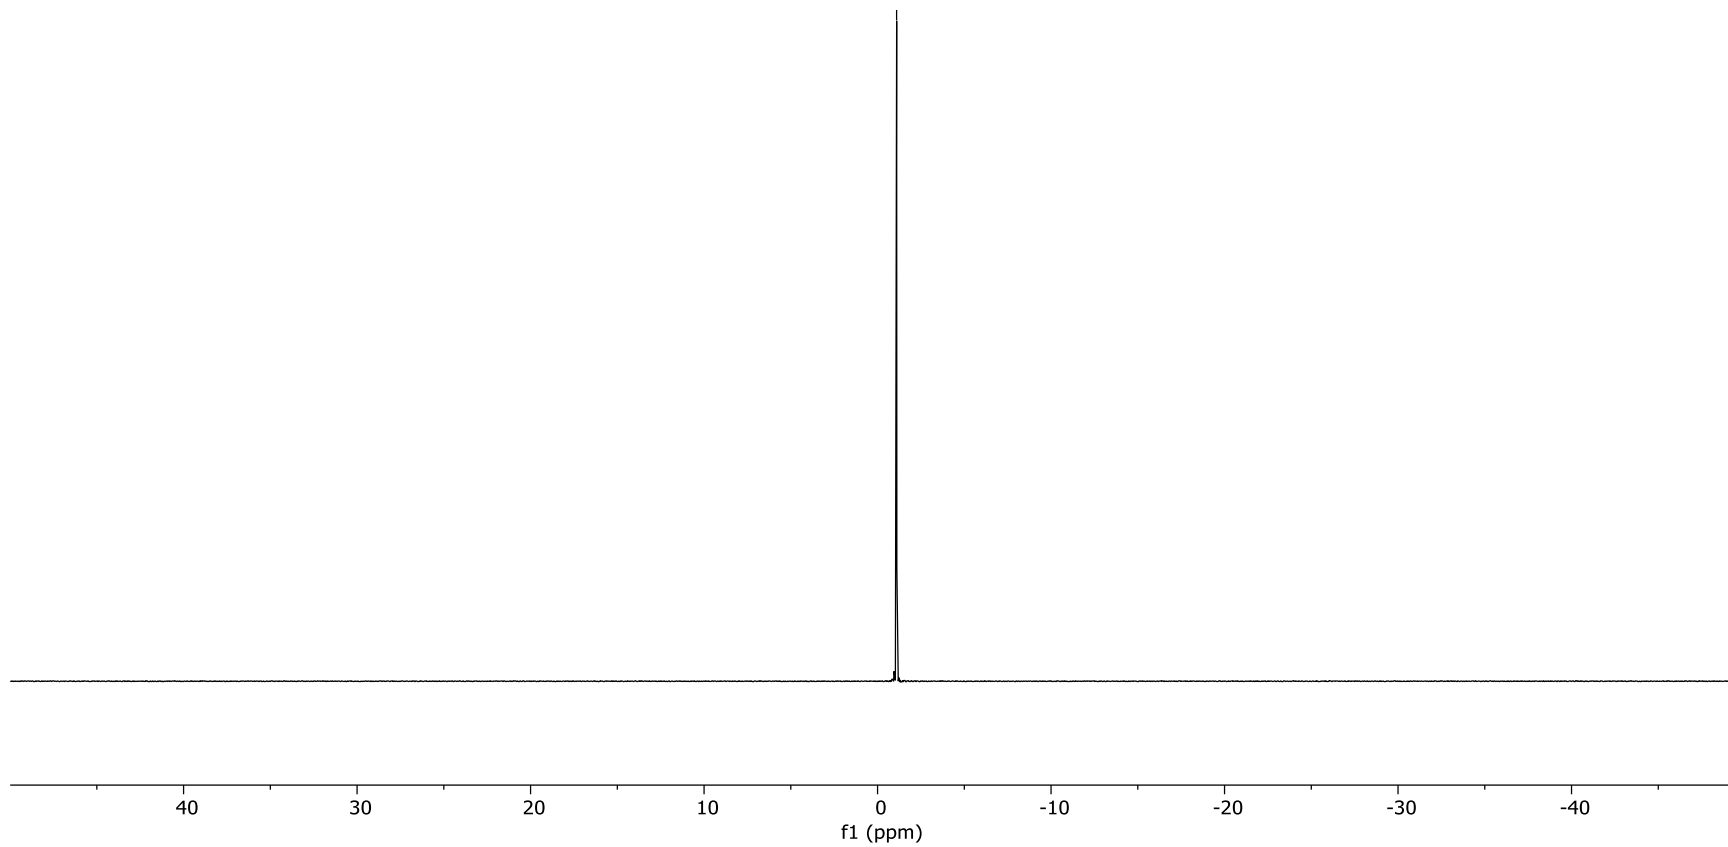

7.683  
7.680  
7.677  
7.674  
7.668  
7.664  
7.661  
7.656  
7.444  
7.441  
7.436  
7.429  
7.424  
7.418  
7.415  
7.412  
7.406  
7.404  
7.402  
7.399  
7.391  
7.388  
7.386  
7.384  
7.377  
7.374  
7.371  
5.802  
5.790  
5.782  
5.779  
5.633  
5.629  
5.626  
5.620  
5.616  
5.607  
4.517  
4.515  
4.512  
4.510  
4.504  
4.502  
4.501  
4.499  
4.497  
4.495  
4.494  
4.487  
4.485  
4.483  
4.480  
4.281  
4.279  
4.277  
4.276  
4.274  
4.269  
4.267  
4.266  
4.264  
4.262  
4.088  
4.085  
4.074  
4.071  
4.069  
4.064  
4.060  
4.057  
4.055  
4.051  
4.046  
4.044  
4.041  
4.030  
4.027  
1.304  
1.302  
1.290  
1.288  
1.276  
1.274  
1.065  
1.055  
1.049  
1.043

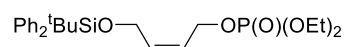

**16**

<sup>1</sup>H, CDCl<sub>3</sub>, 500 MHz

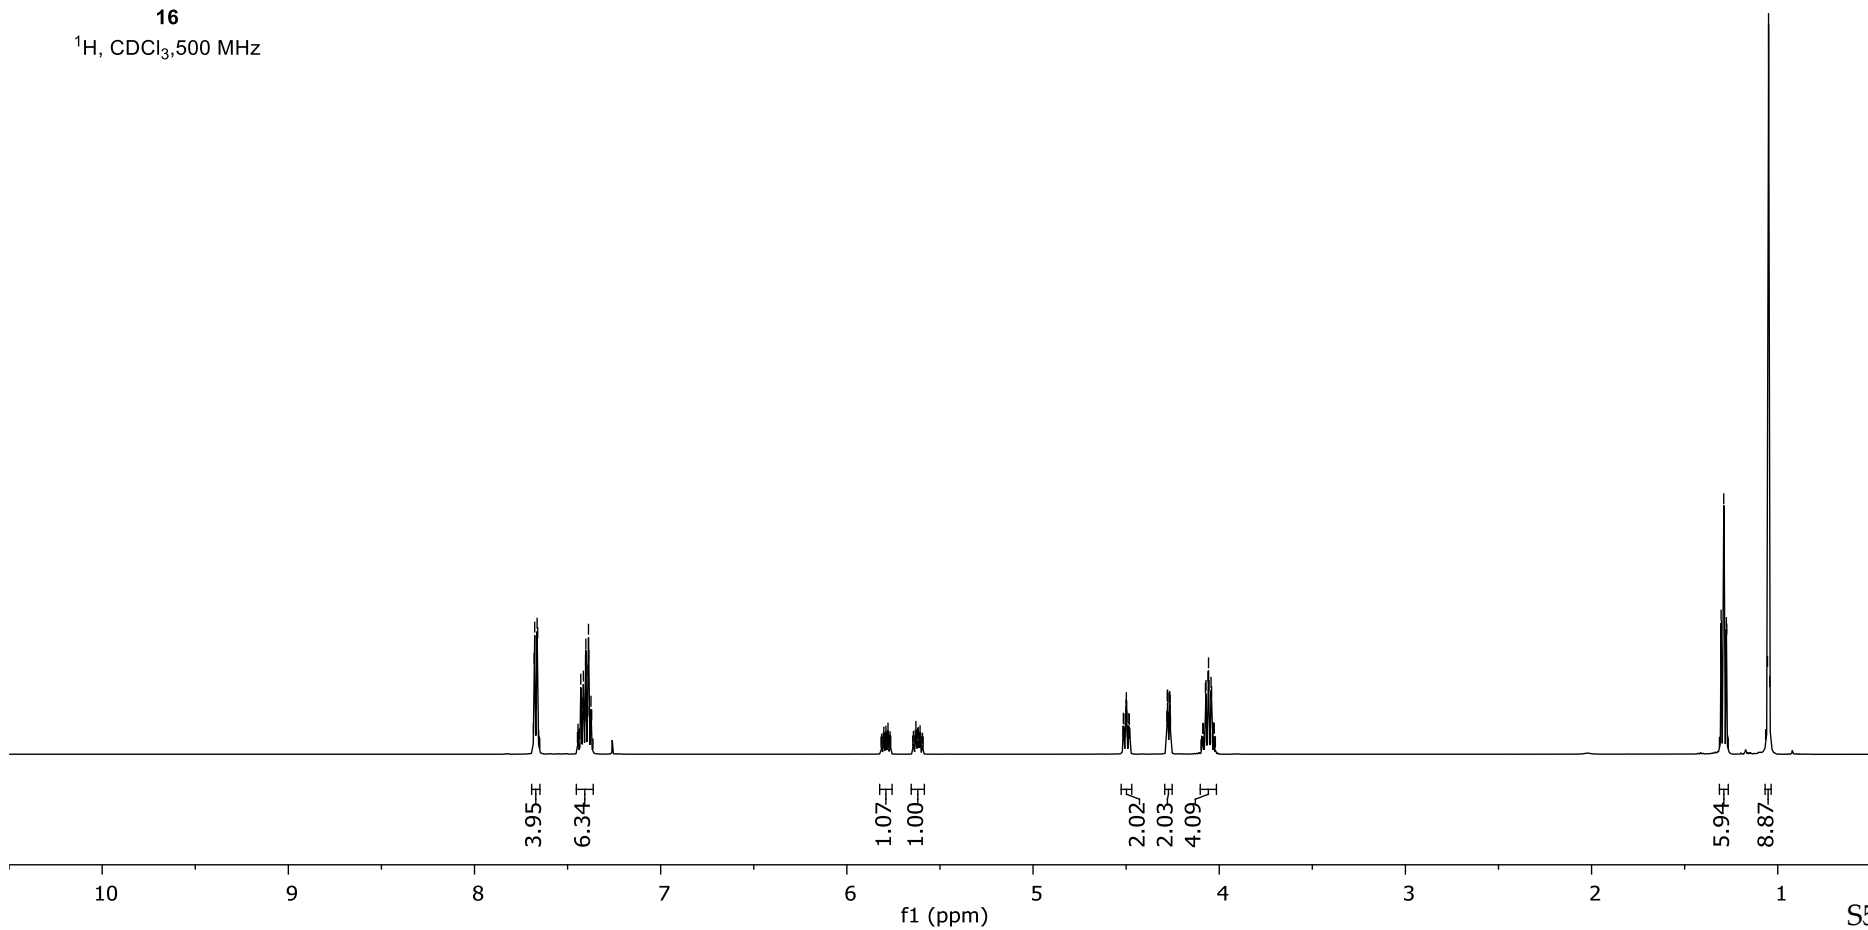

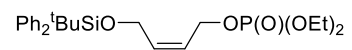

16

 $^{13}\text{C}\{^1\text{H}\}$ ,  $\text{CDCl}_3$ , 126 MHz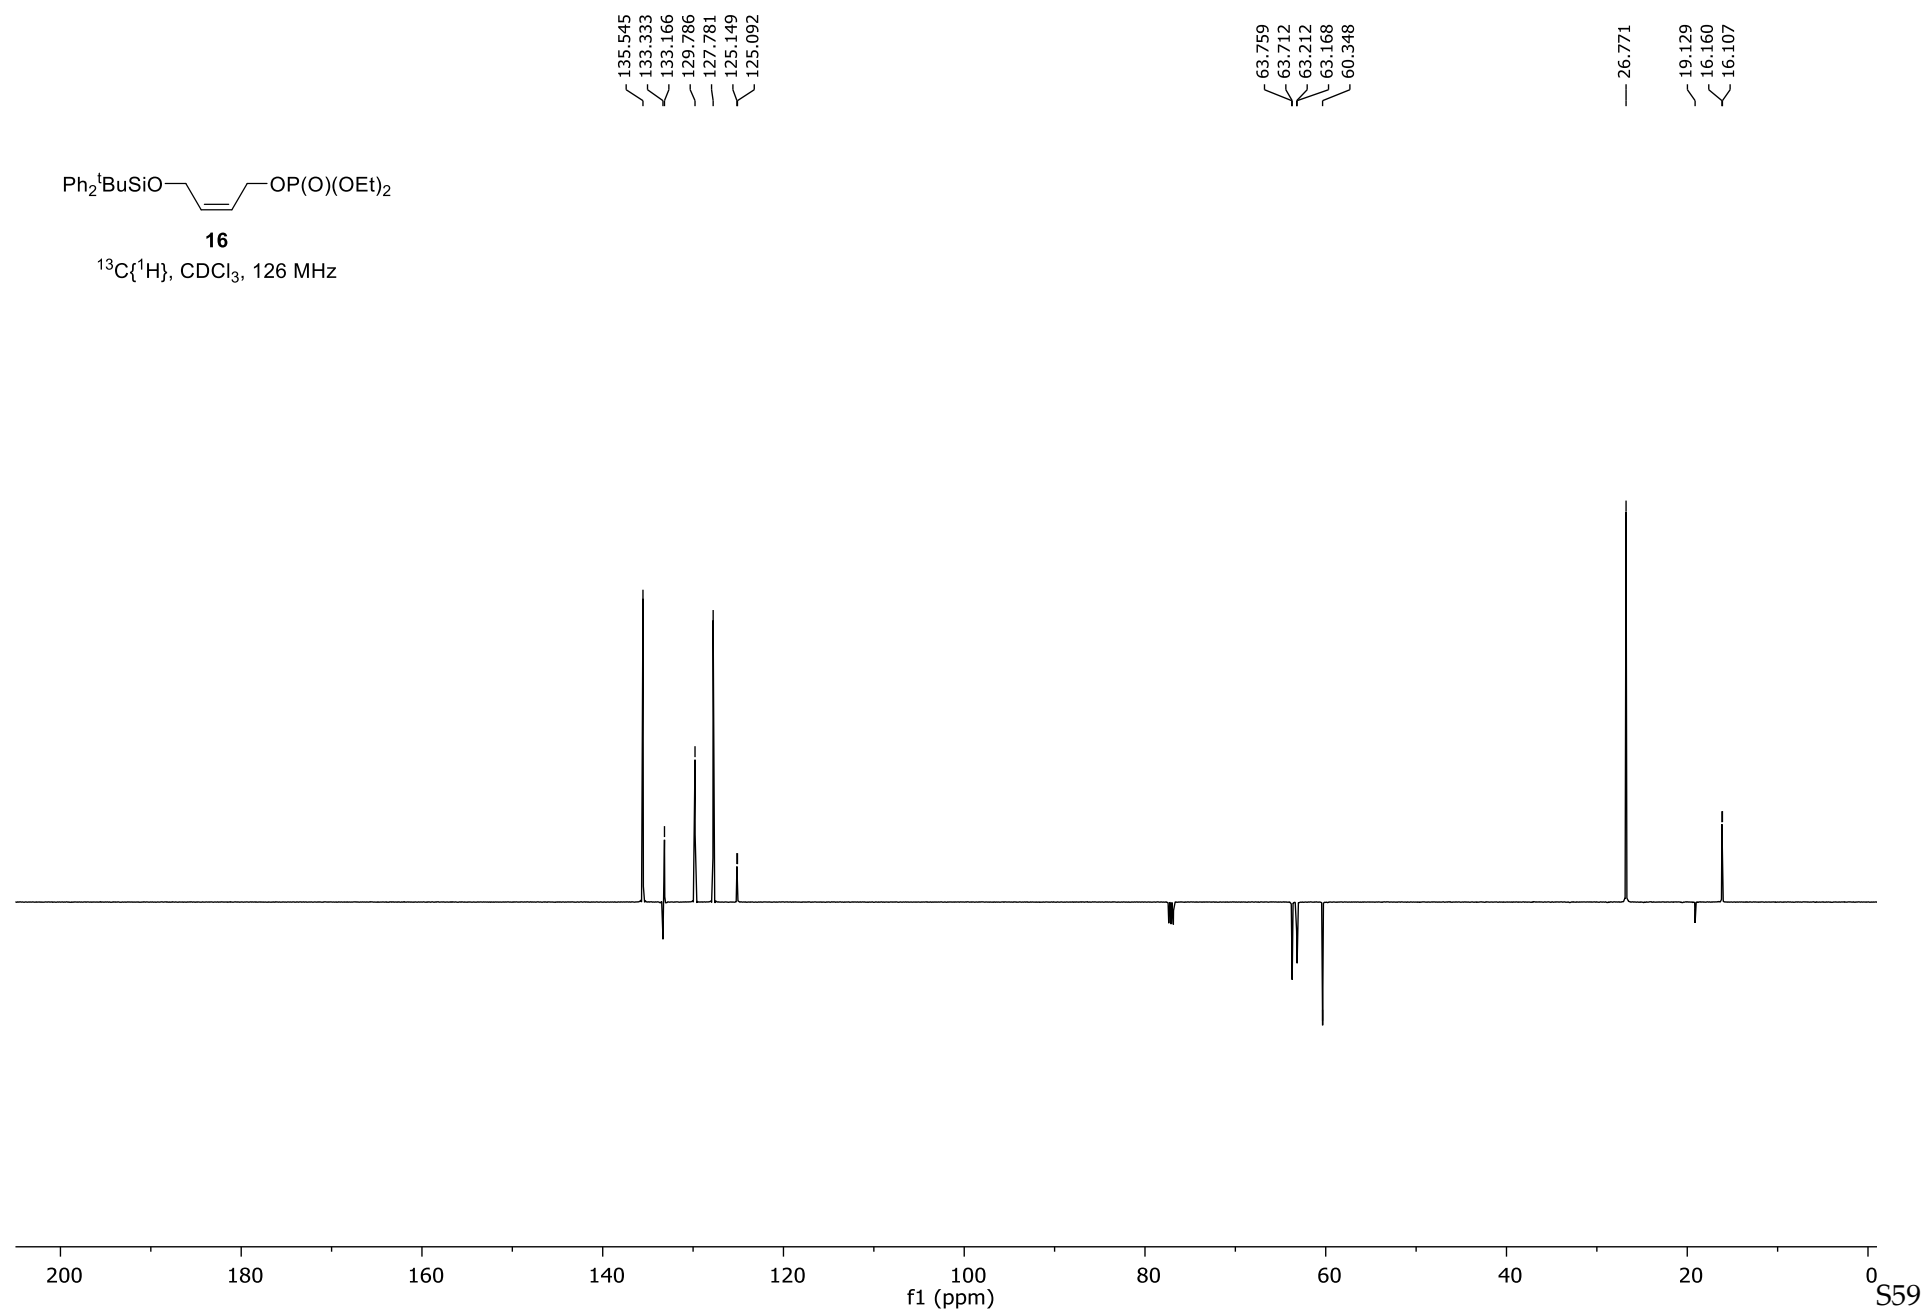

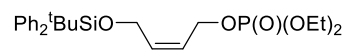

**16**

$^{31}\text{P}\{^1\text{H}\}$ ,  $\text{CDCl}_3$ , 162 MHz

— -0.839

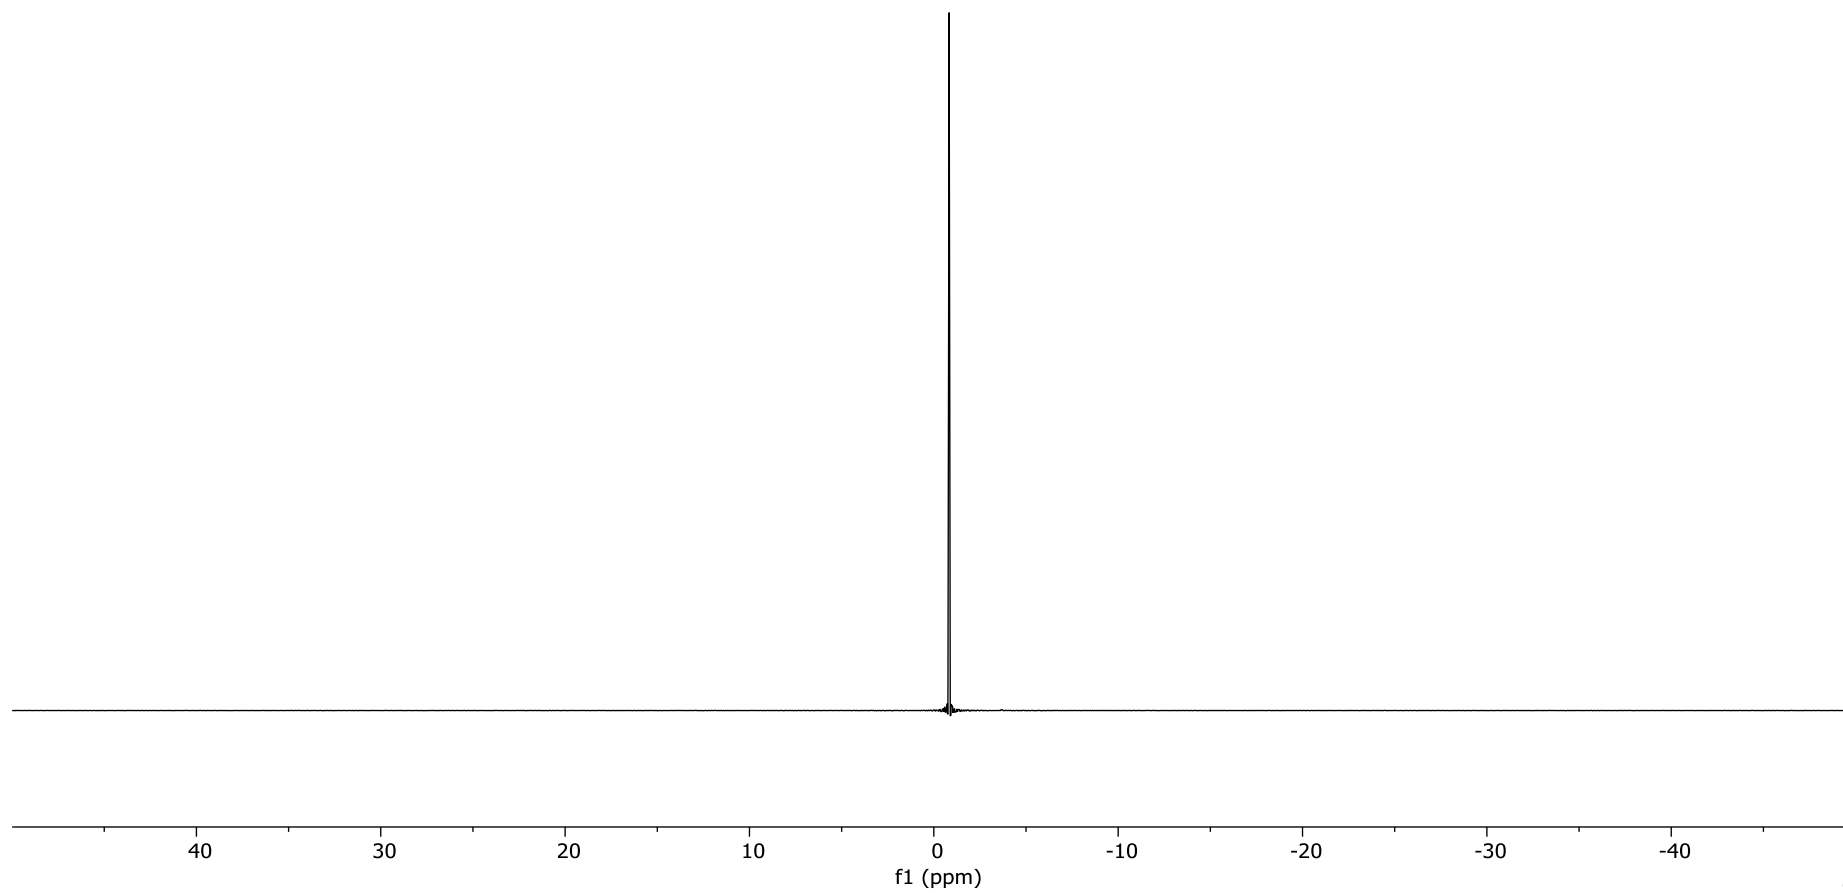

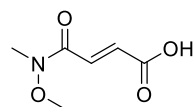

**SI-7**

$^1\text{H}$ ,  $\text{CDCl}_3$ , 500 MHz

7.554  
7.523

6.929  
6.898

3.759

3.307

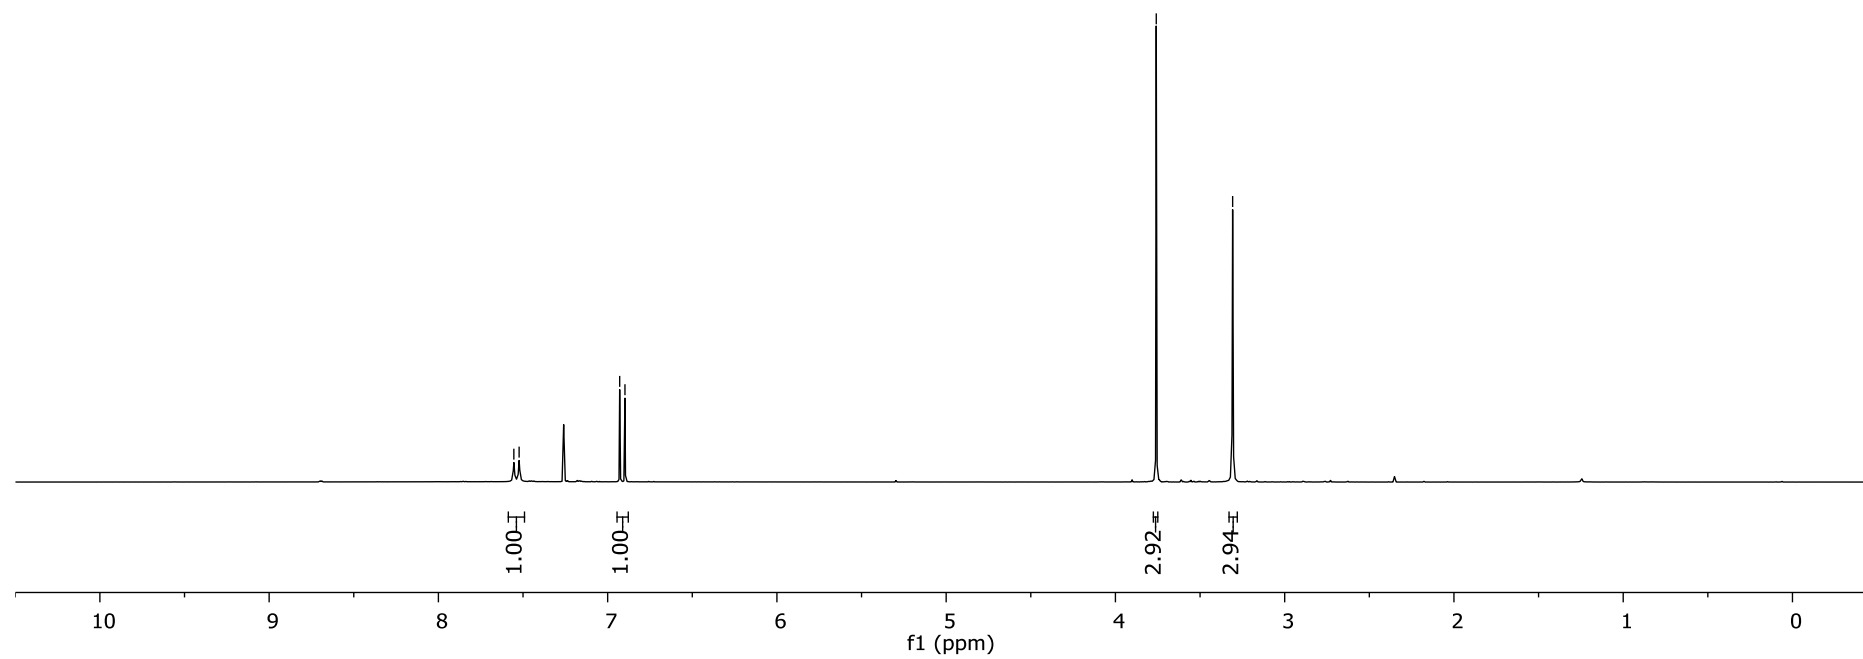

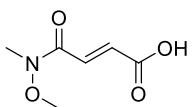

SI-7

$^{13}\text{C}\{^1\text{H}\}$ ,  $\text{CDCl}_3$ , 126 MHz

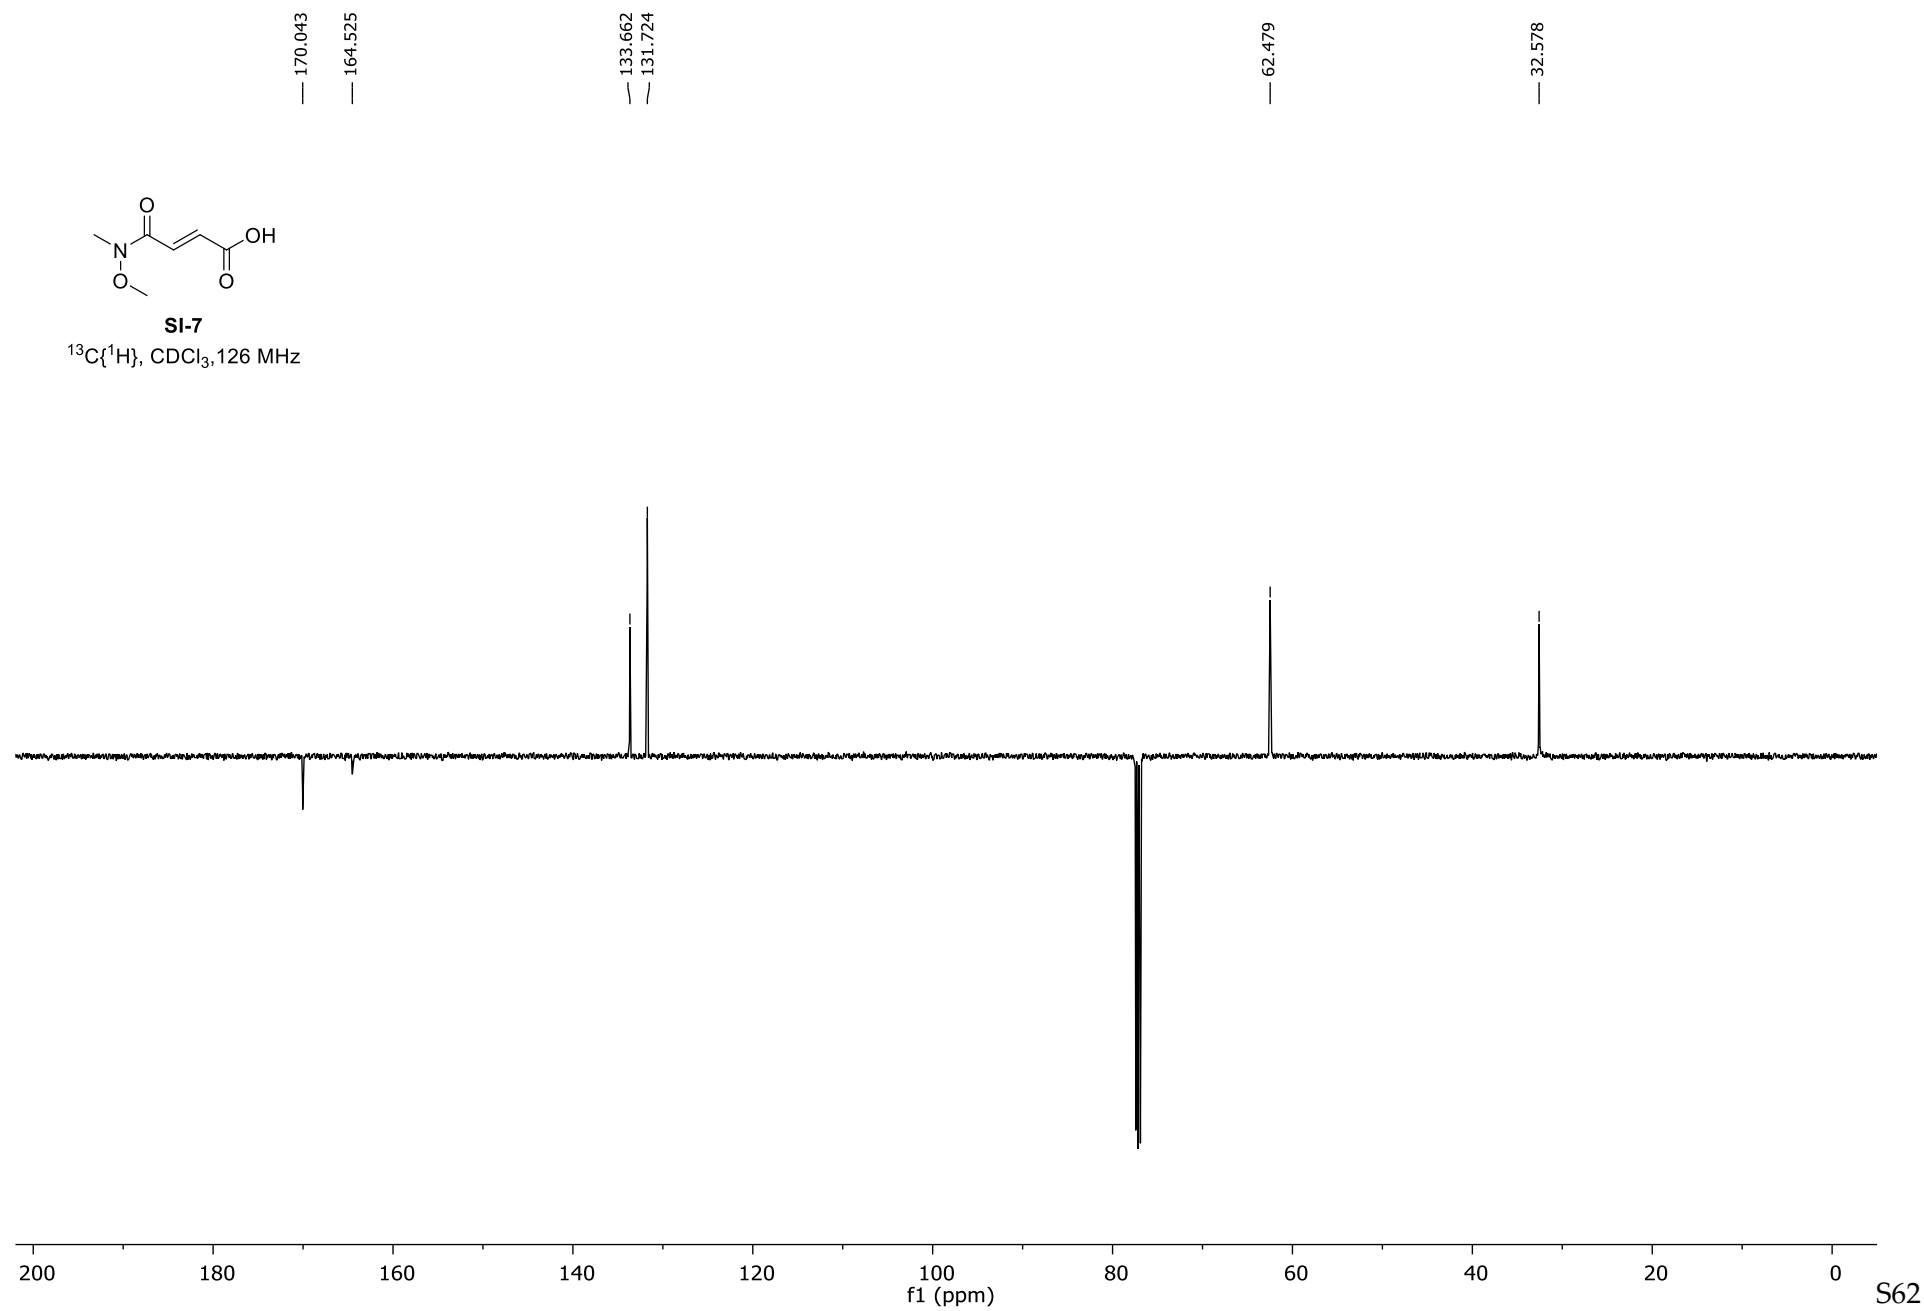

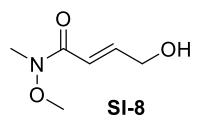

<sup>1</sup>H, CDCl<sub>3</sub>, 400 MHz

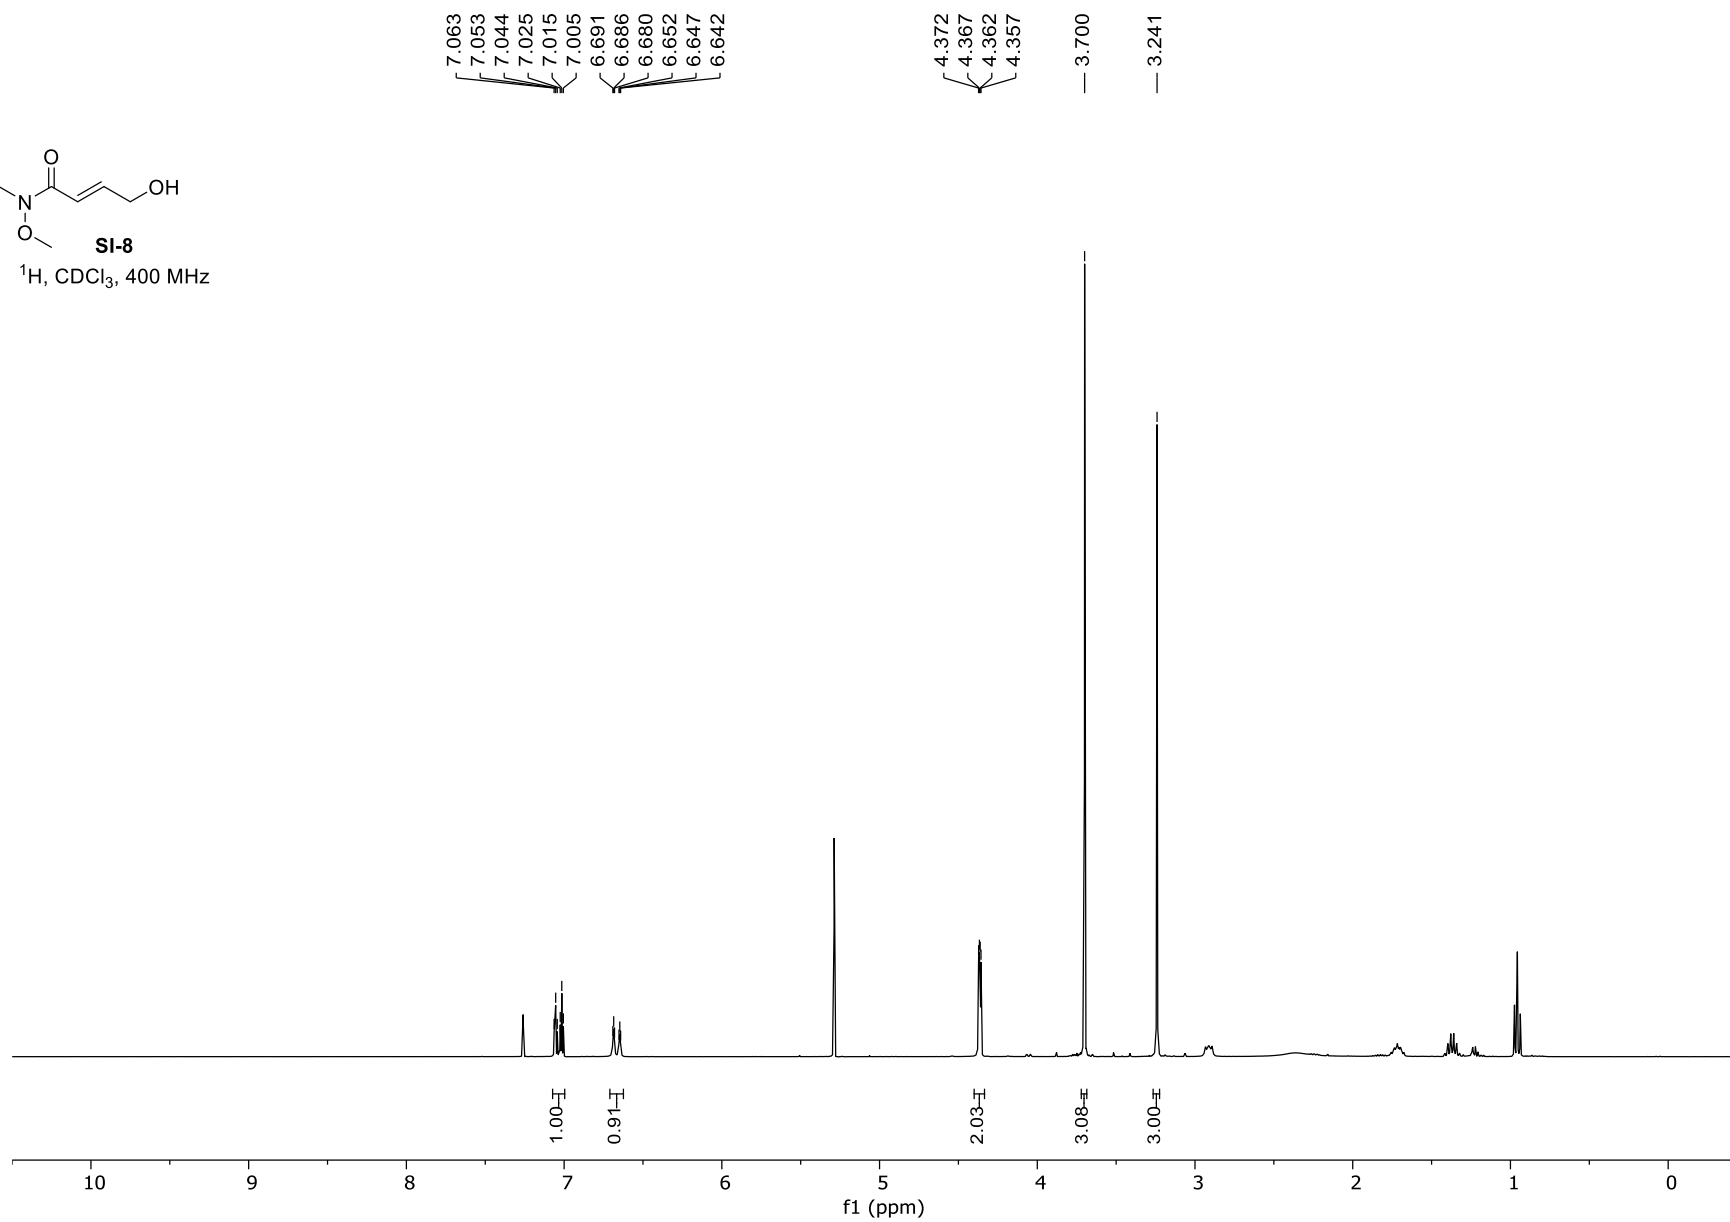

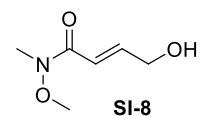

$^{13}\text{C}\{^1\text{H}\}$ ,  $\text{CDCl}_3$ , 126 MHz

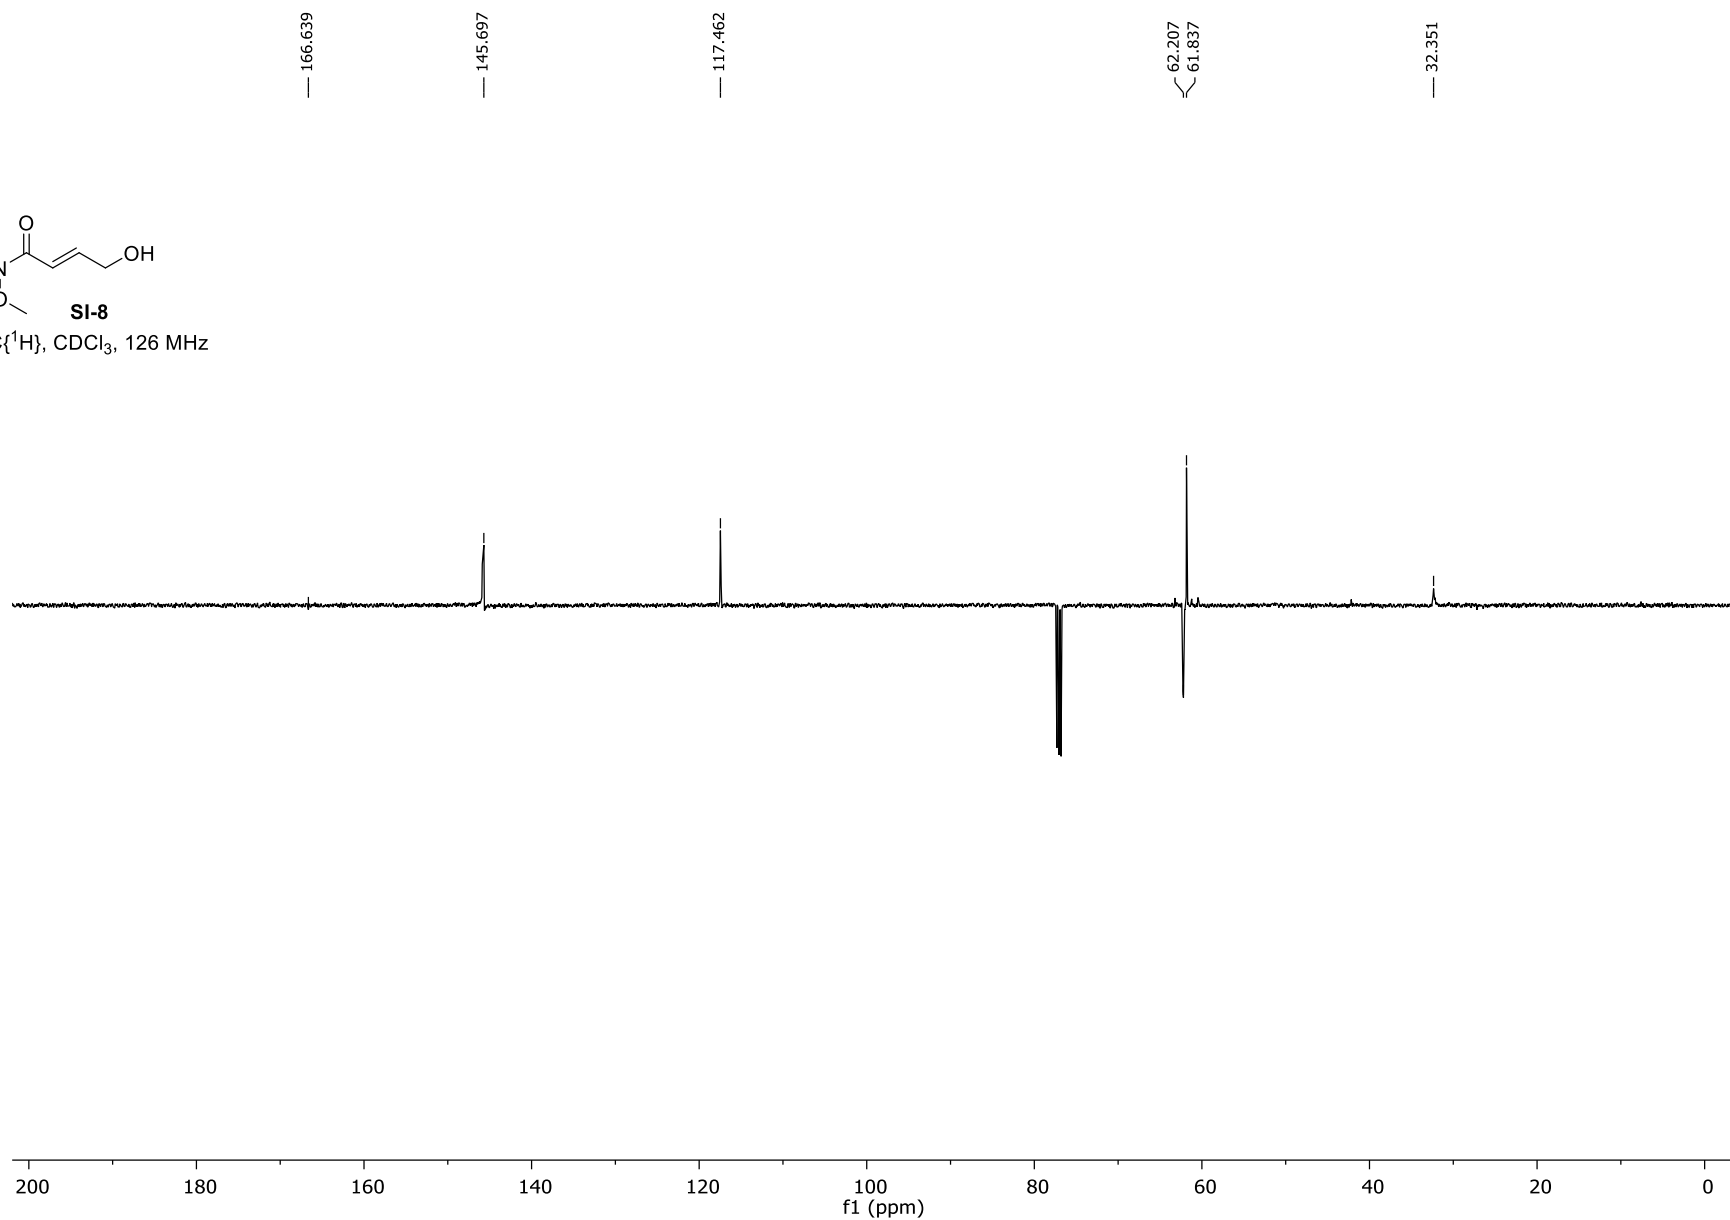



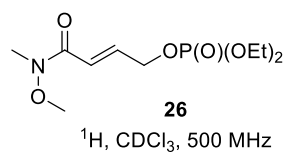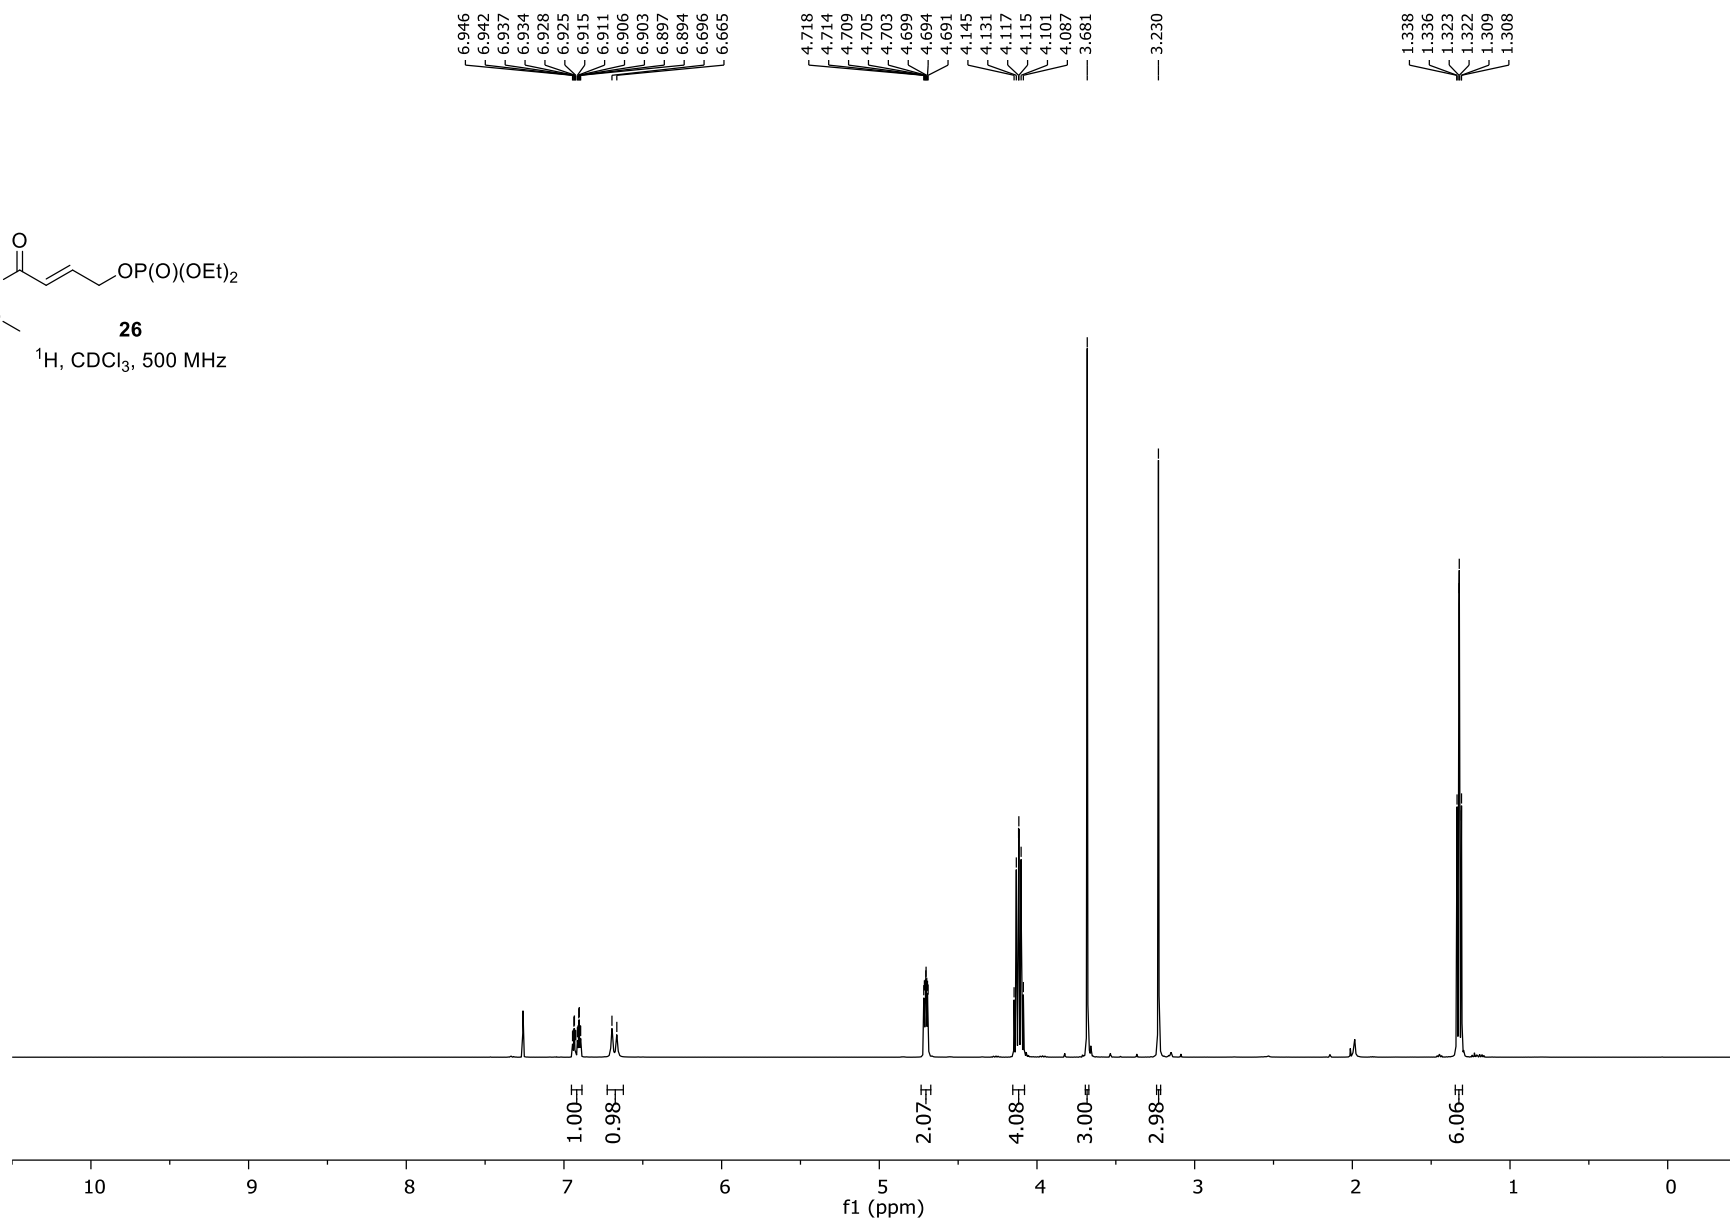

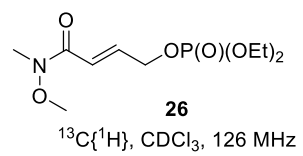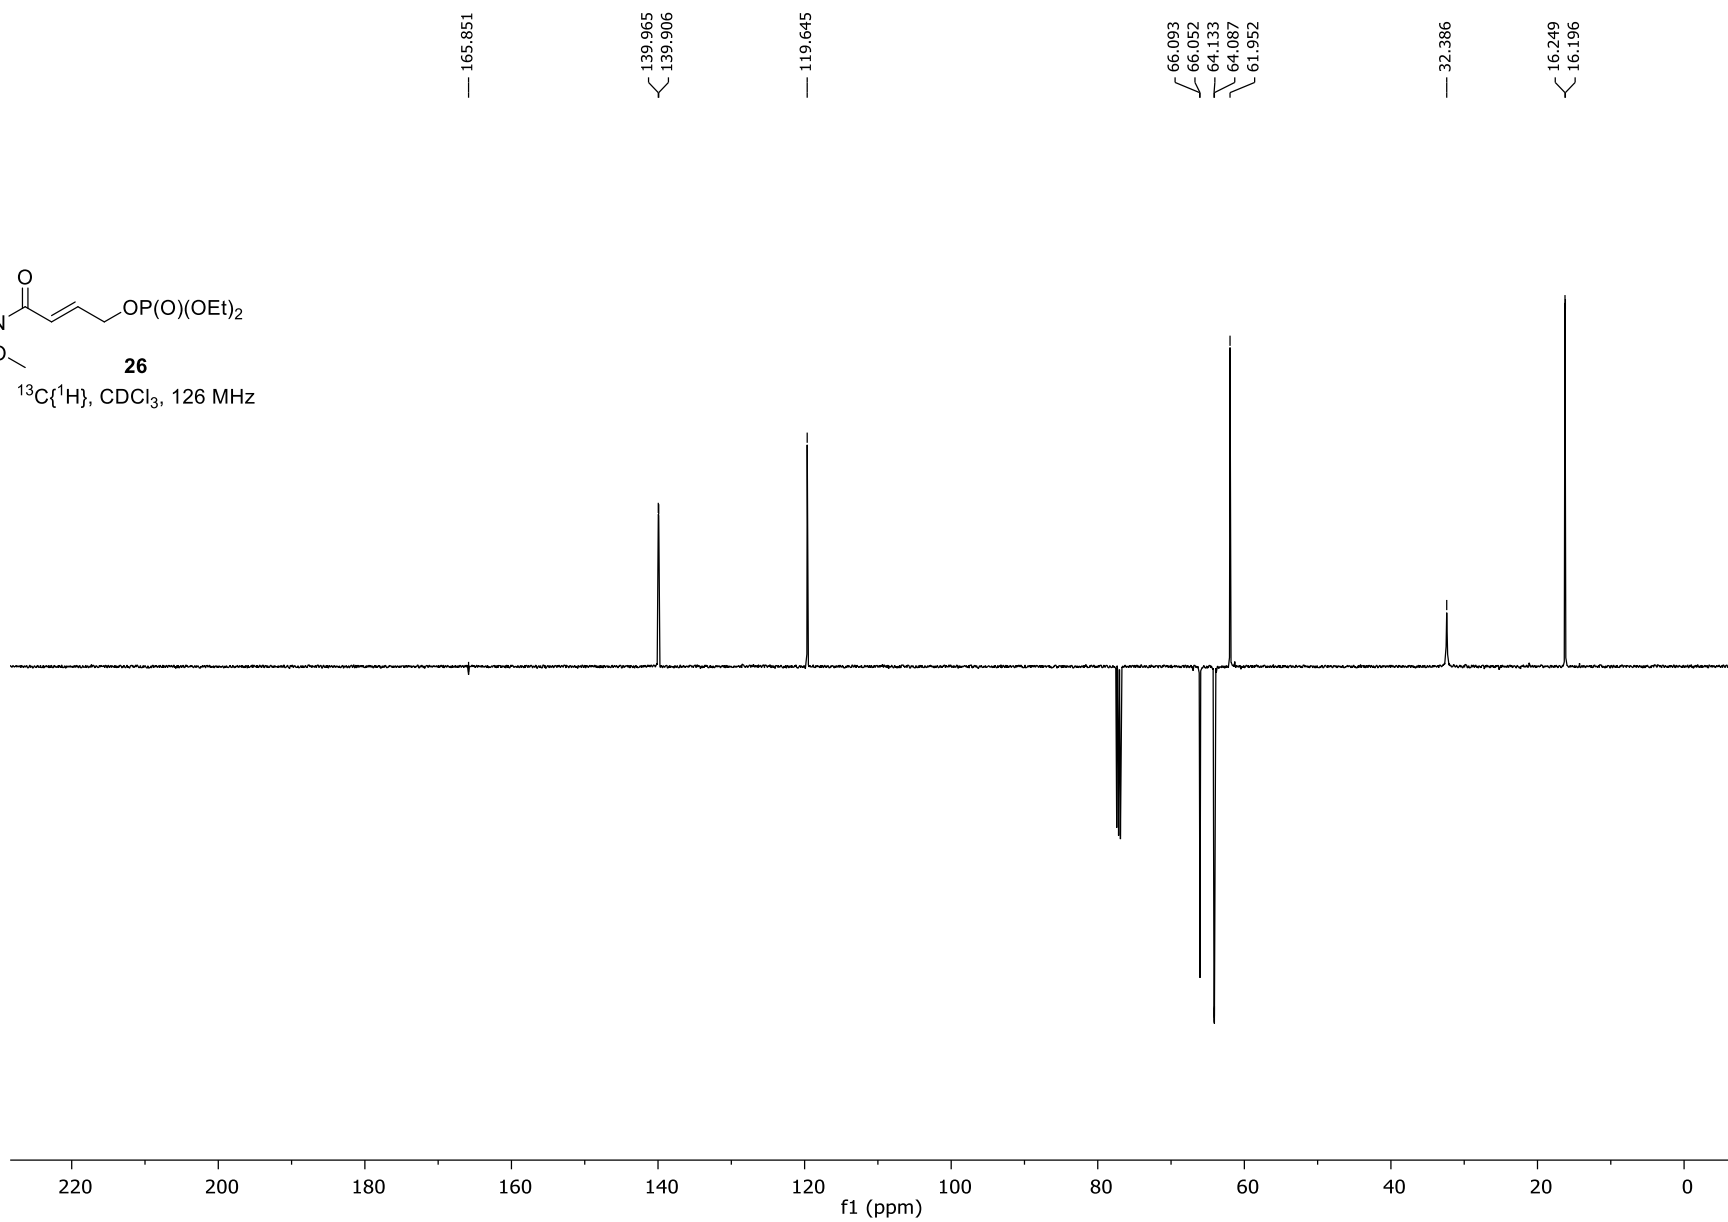

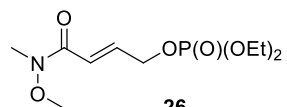

$^{31}\text{P}\{^1\text{H}\}$ ,  $\text{CDCl}_3$ , 162 MHz

-1.068

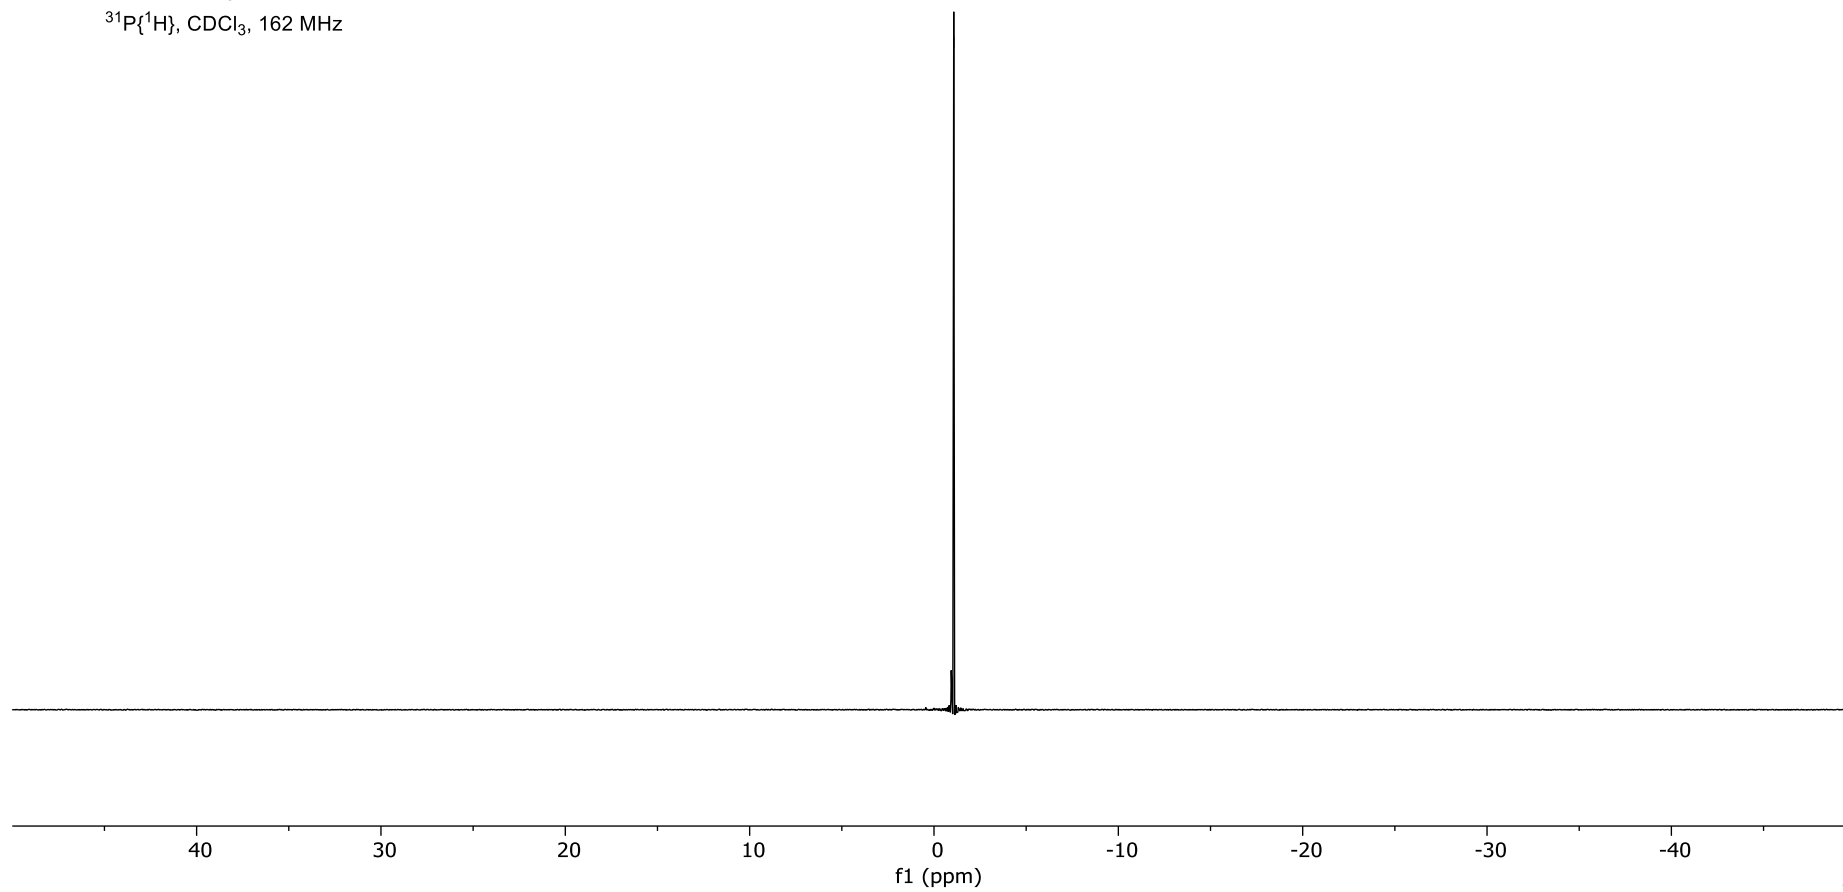

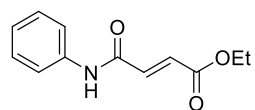

**SI-9**

$^1\text{H}$ ,  $\text{CDCl}_3$ , 500 MHz

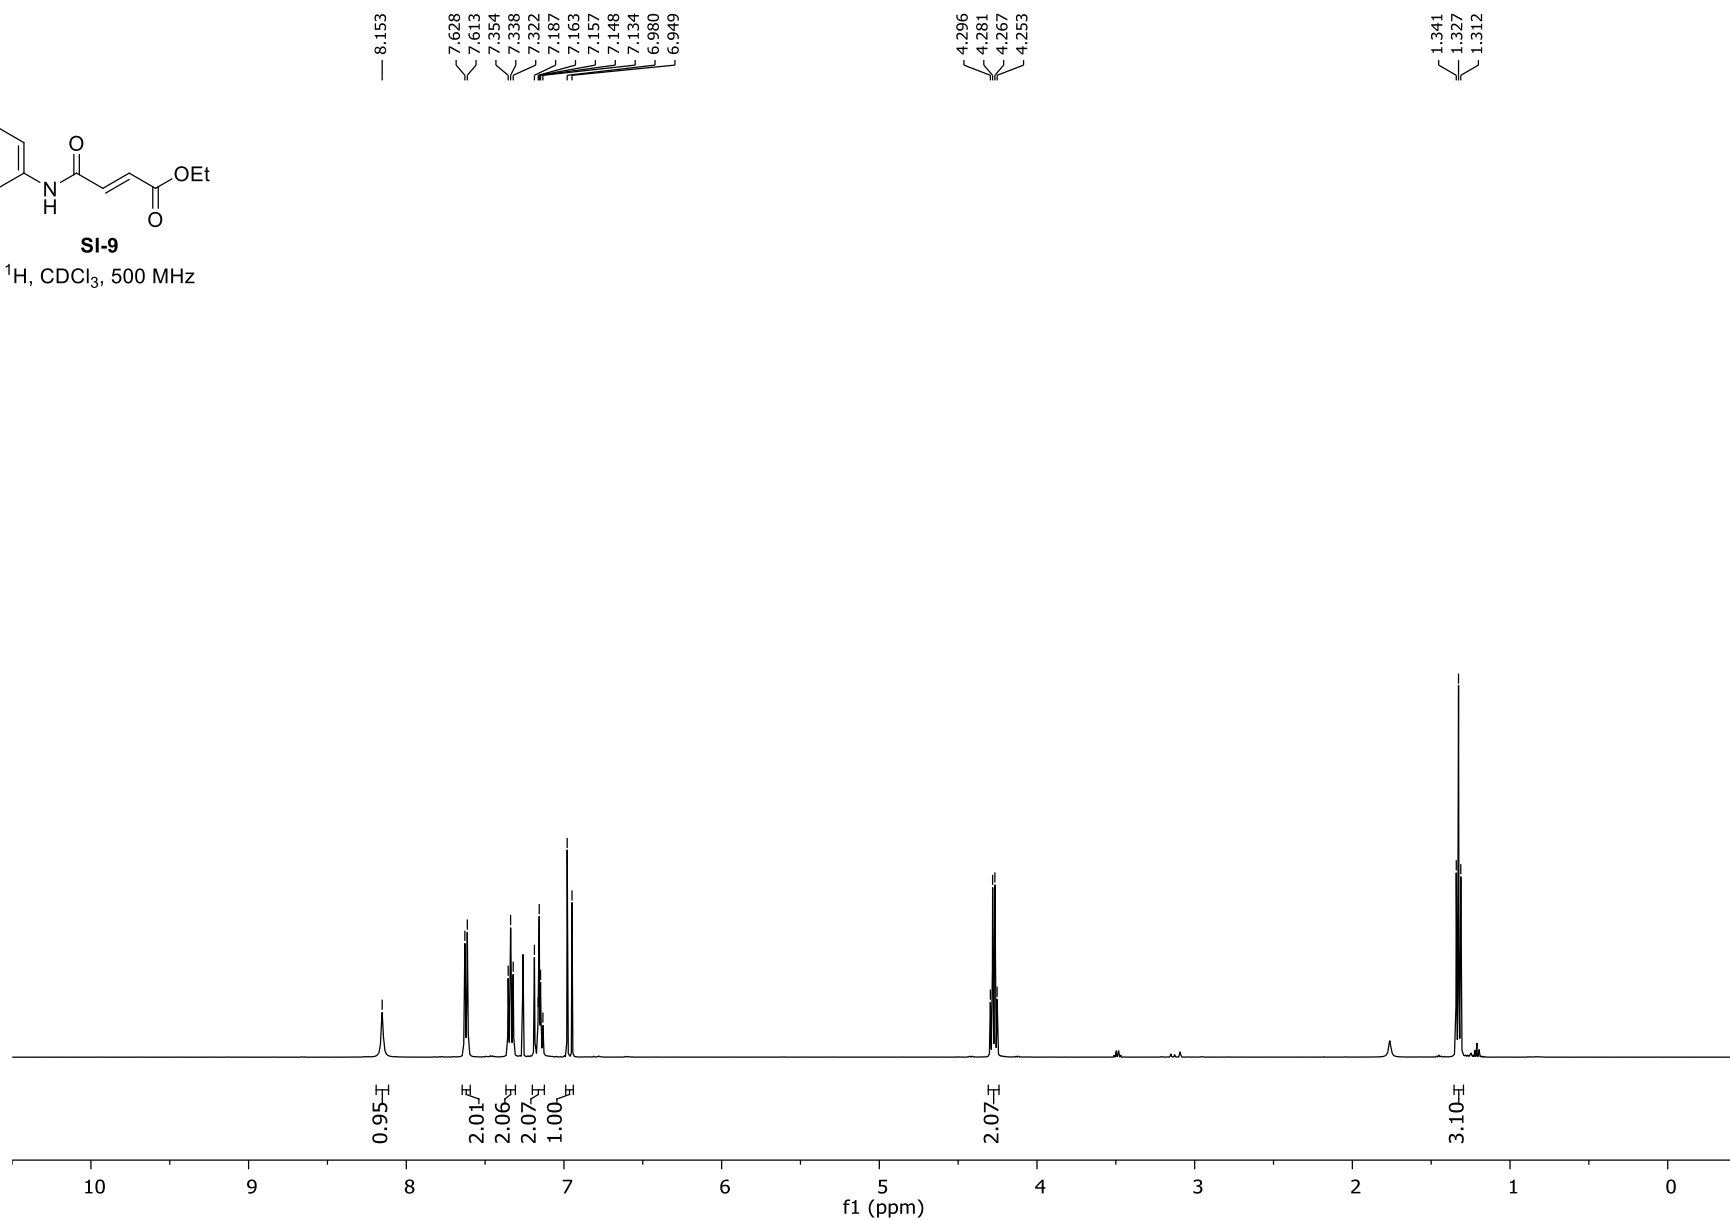

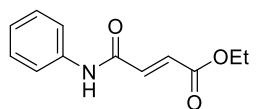

**SI-9**

$^{13}\text{C}\{^1\text{H}\}$ ,  $\text{CDCl}_3$ , 126 MHz

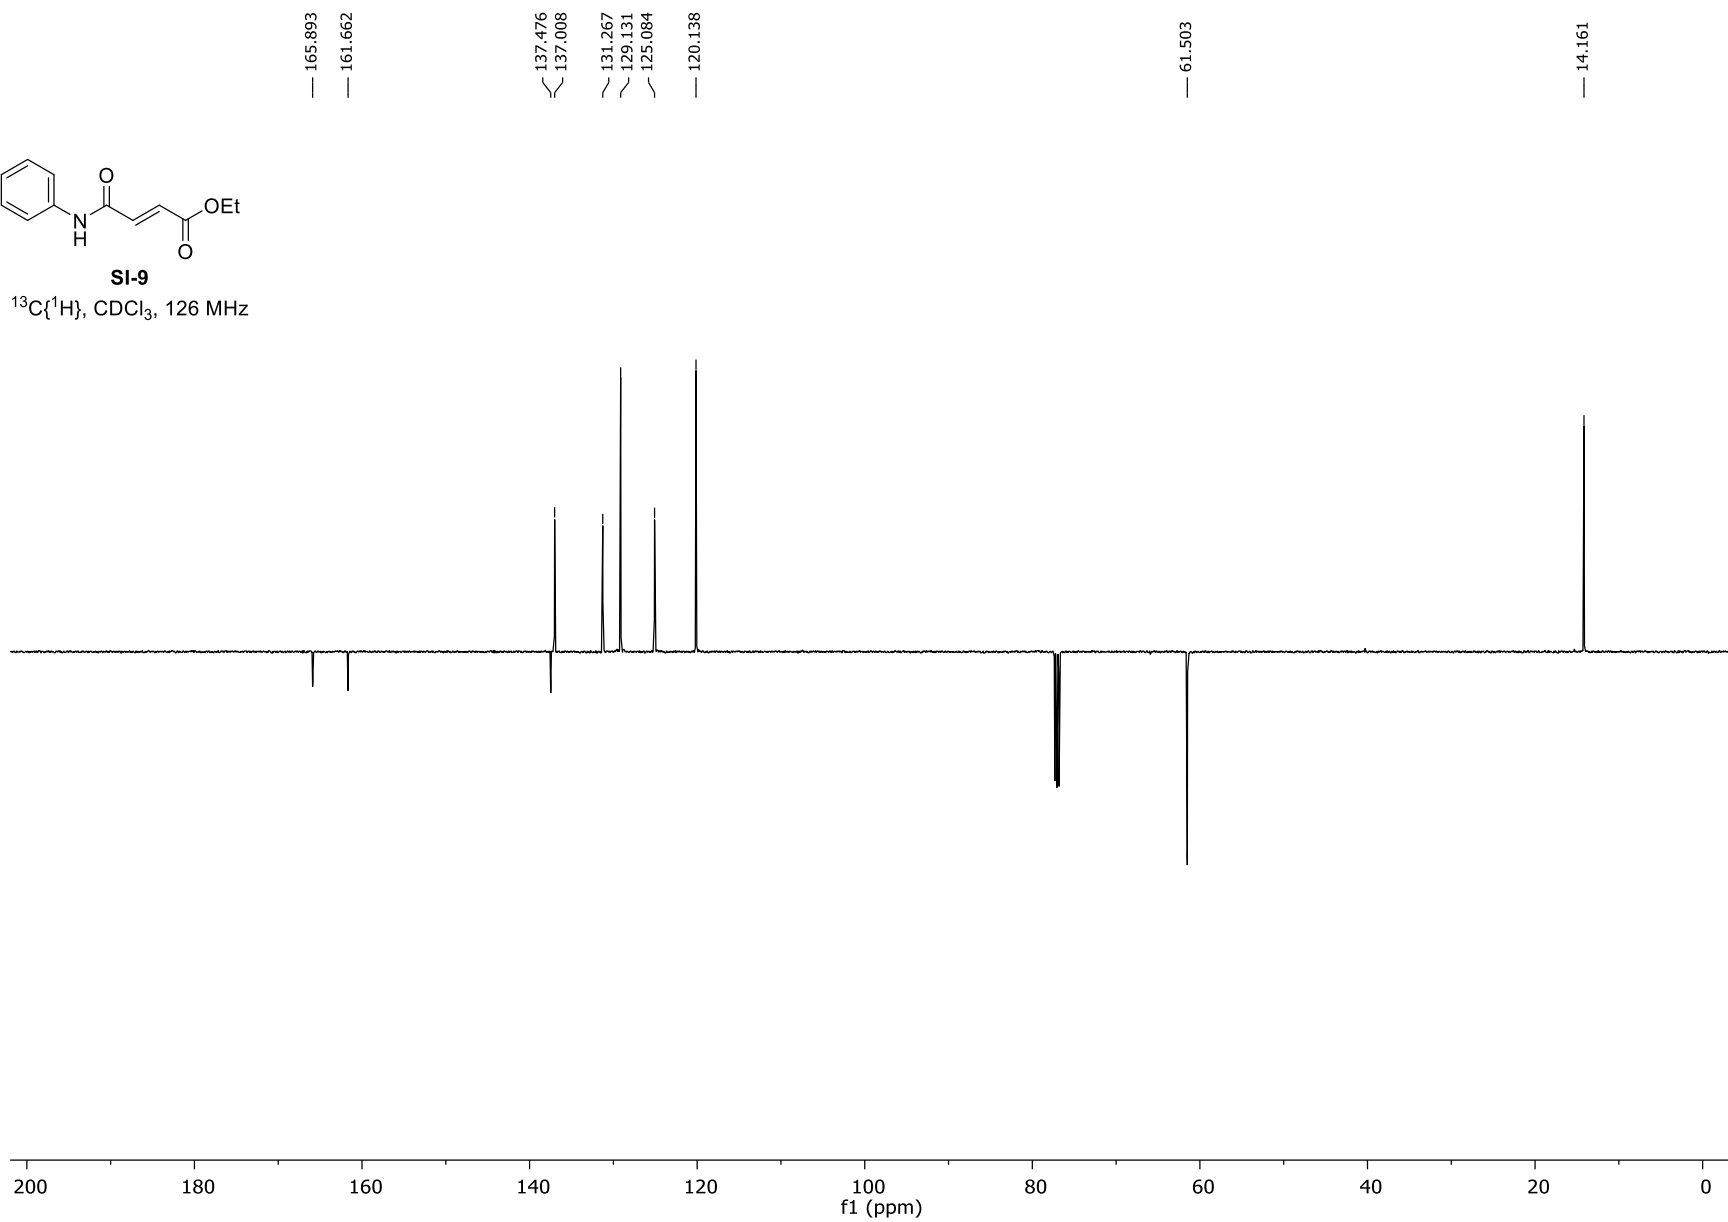

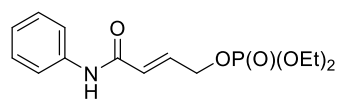

**32**

$^1\text{H}$ ,  $\text{CDCl}_3$ , 500 MHz

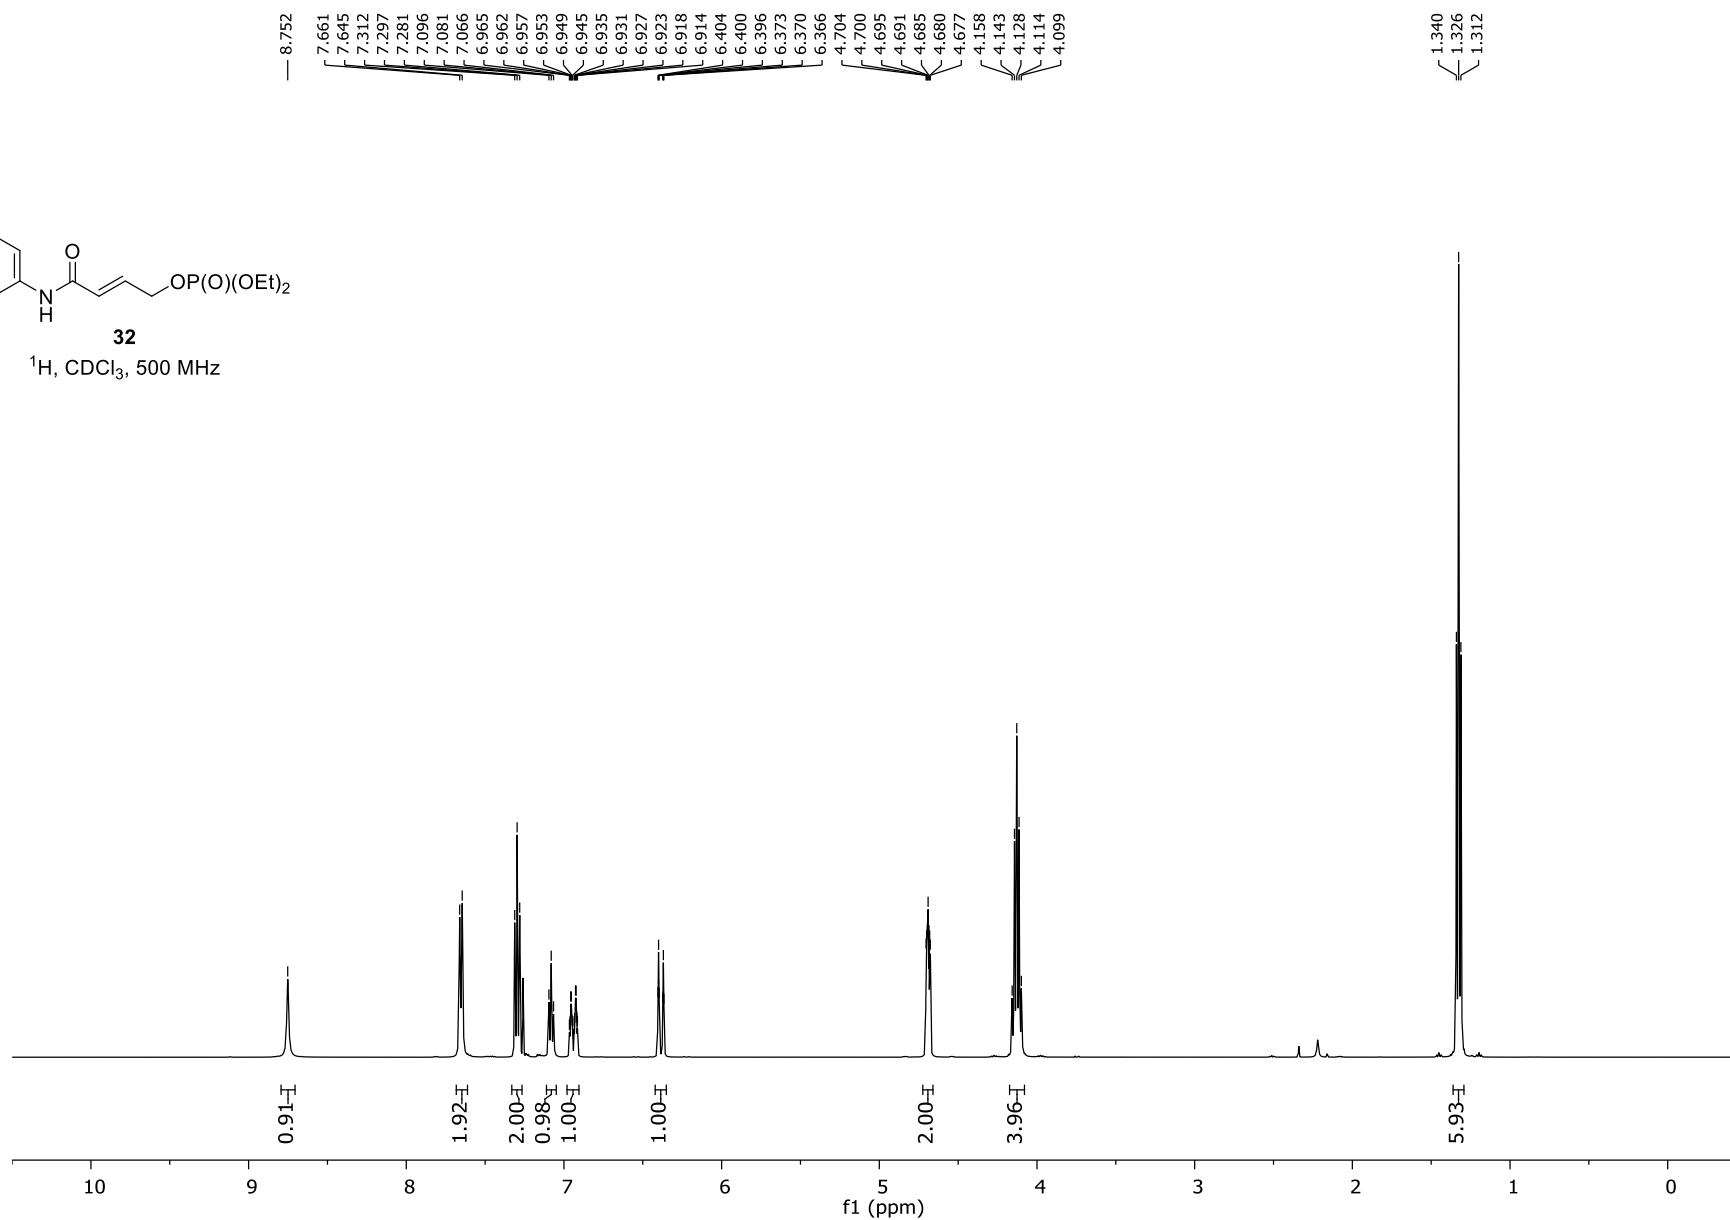

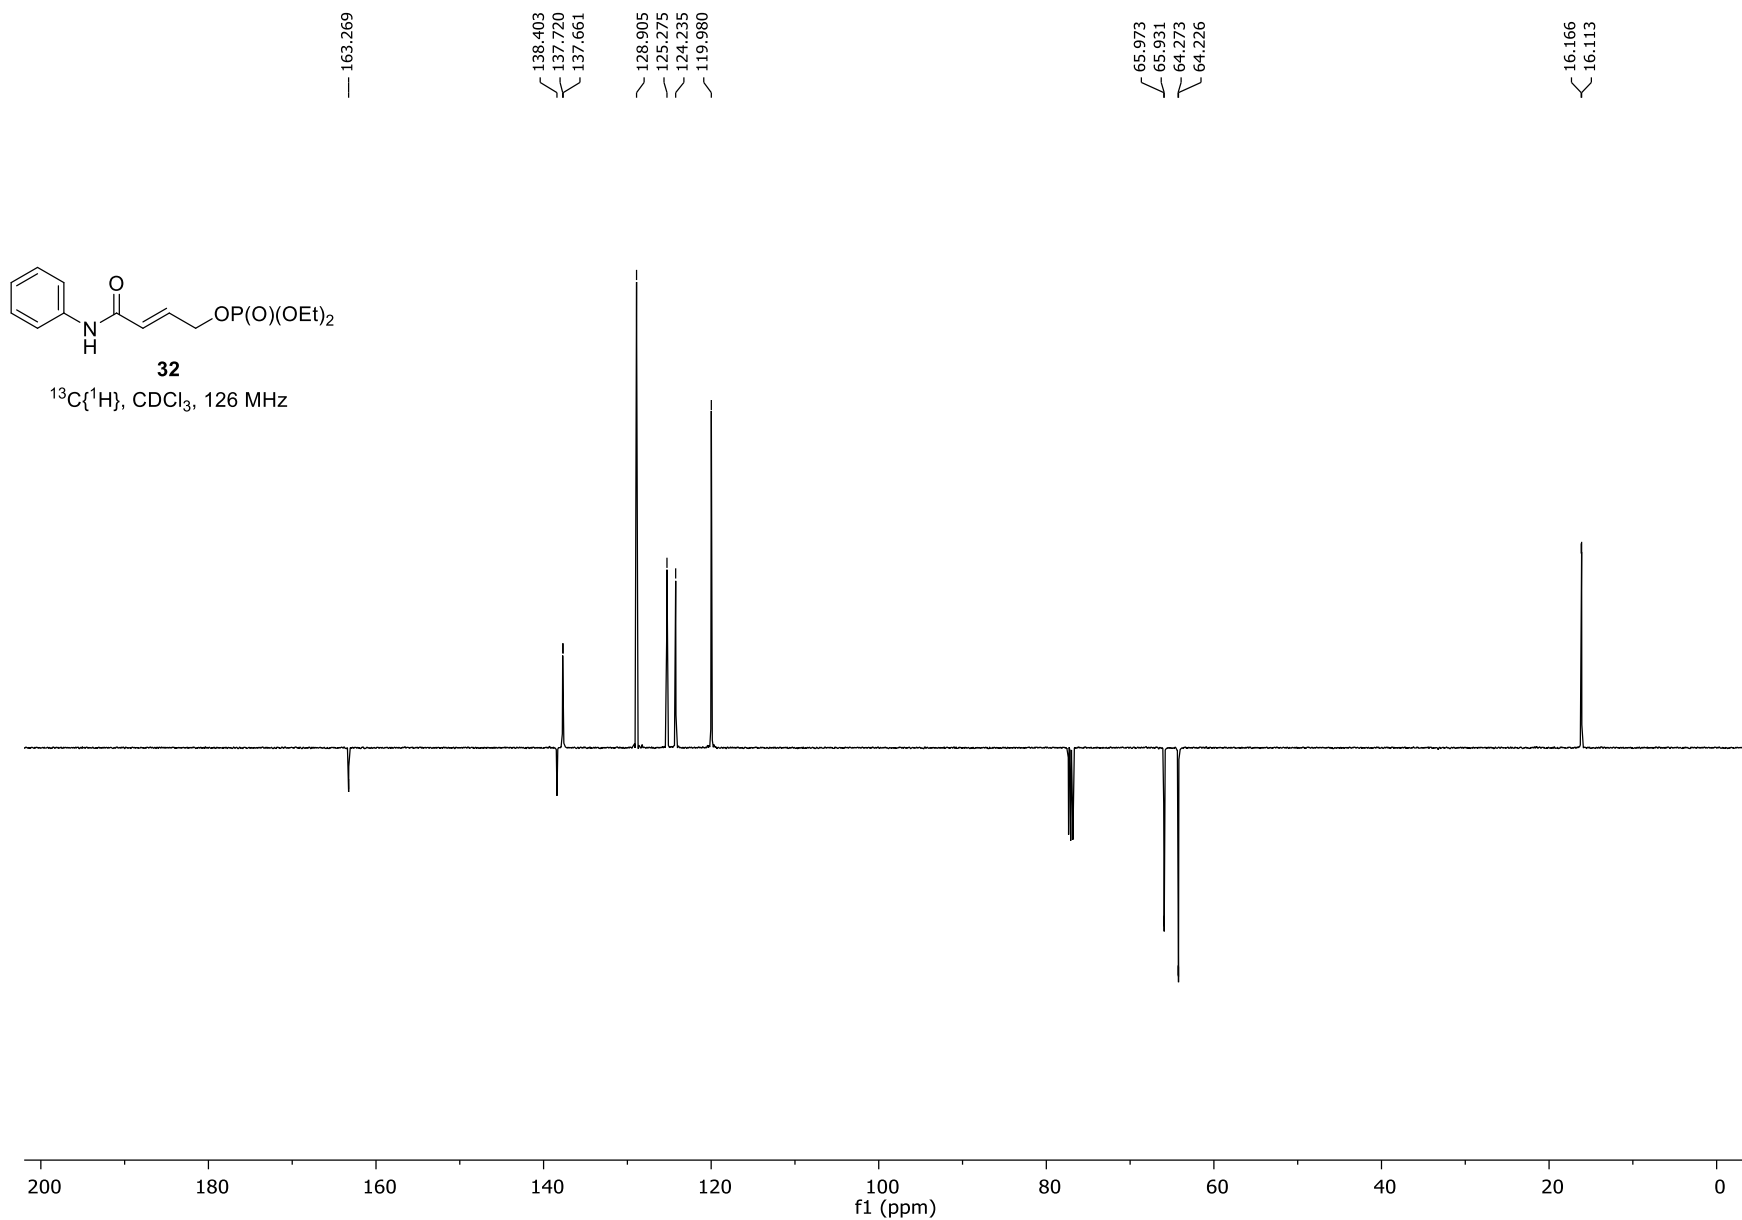

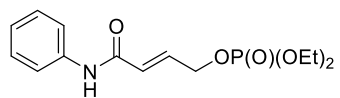

**32**

$^{31}\text{P}\{^1\text{H}\}$ ,  $\text{CDCl}_3$ , 162 MHz

— -1.667

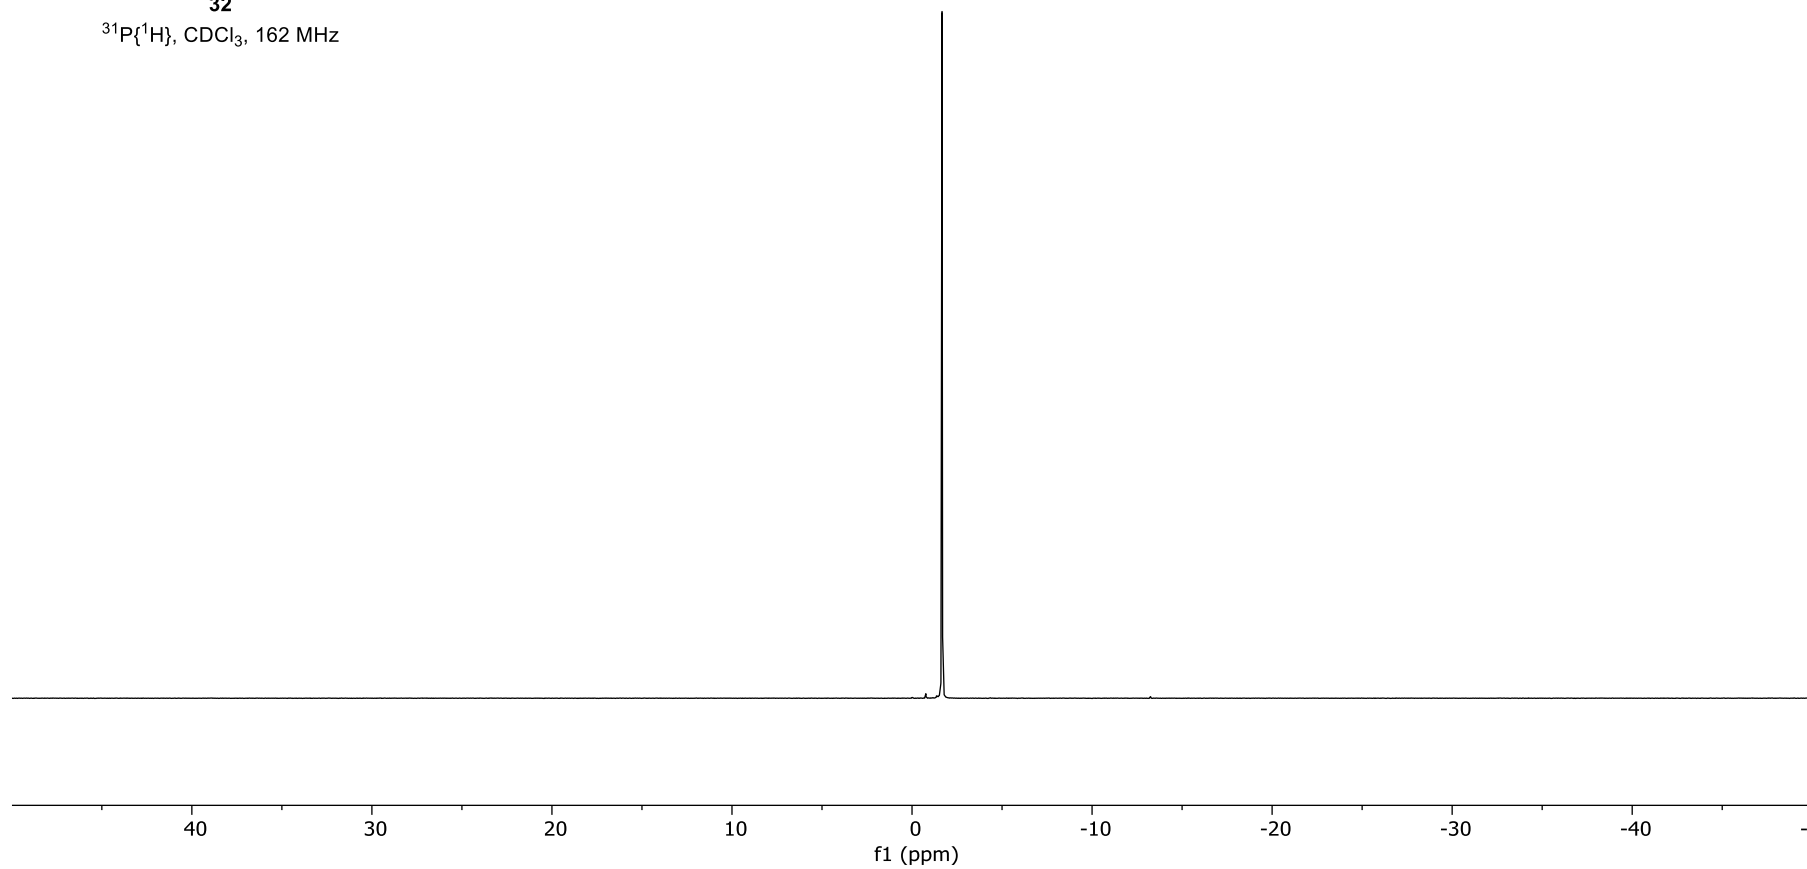



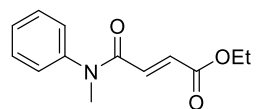

**SI-12**

$^1\text{H}$ ,  $\text{CDCl}_3$ , 500 MHz

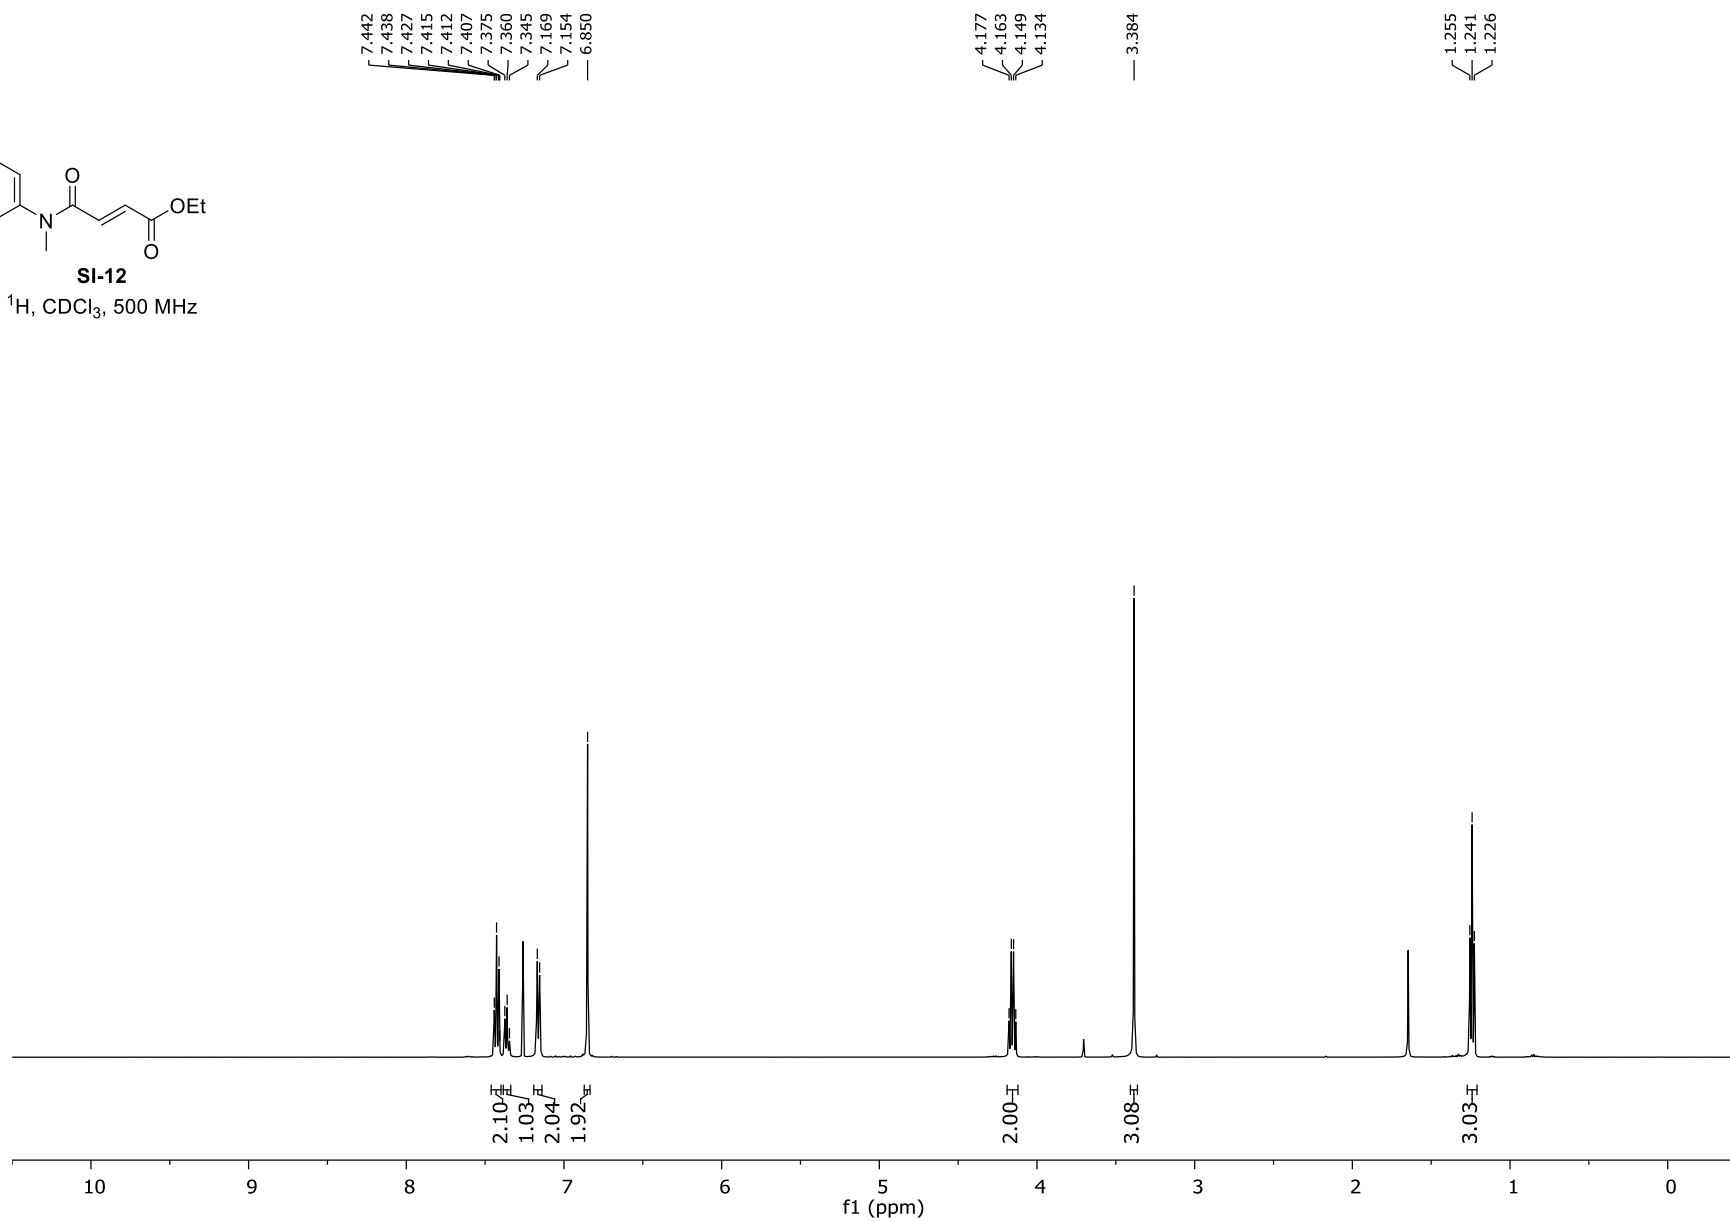

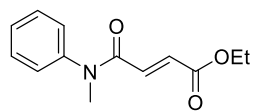

**SI-12**

$^{13}\text{C}\{^1\text{H}\}$ ,  $\text{CDCl}_3$ , 126 MHz

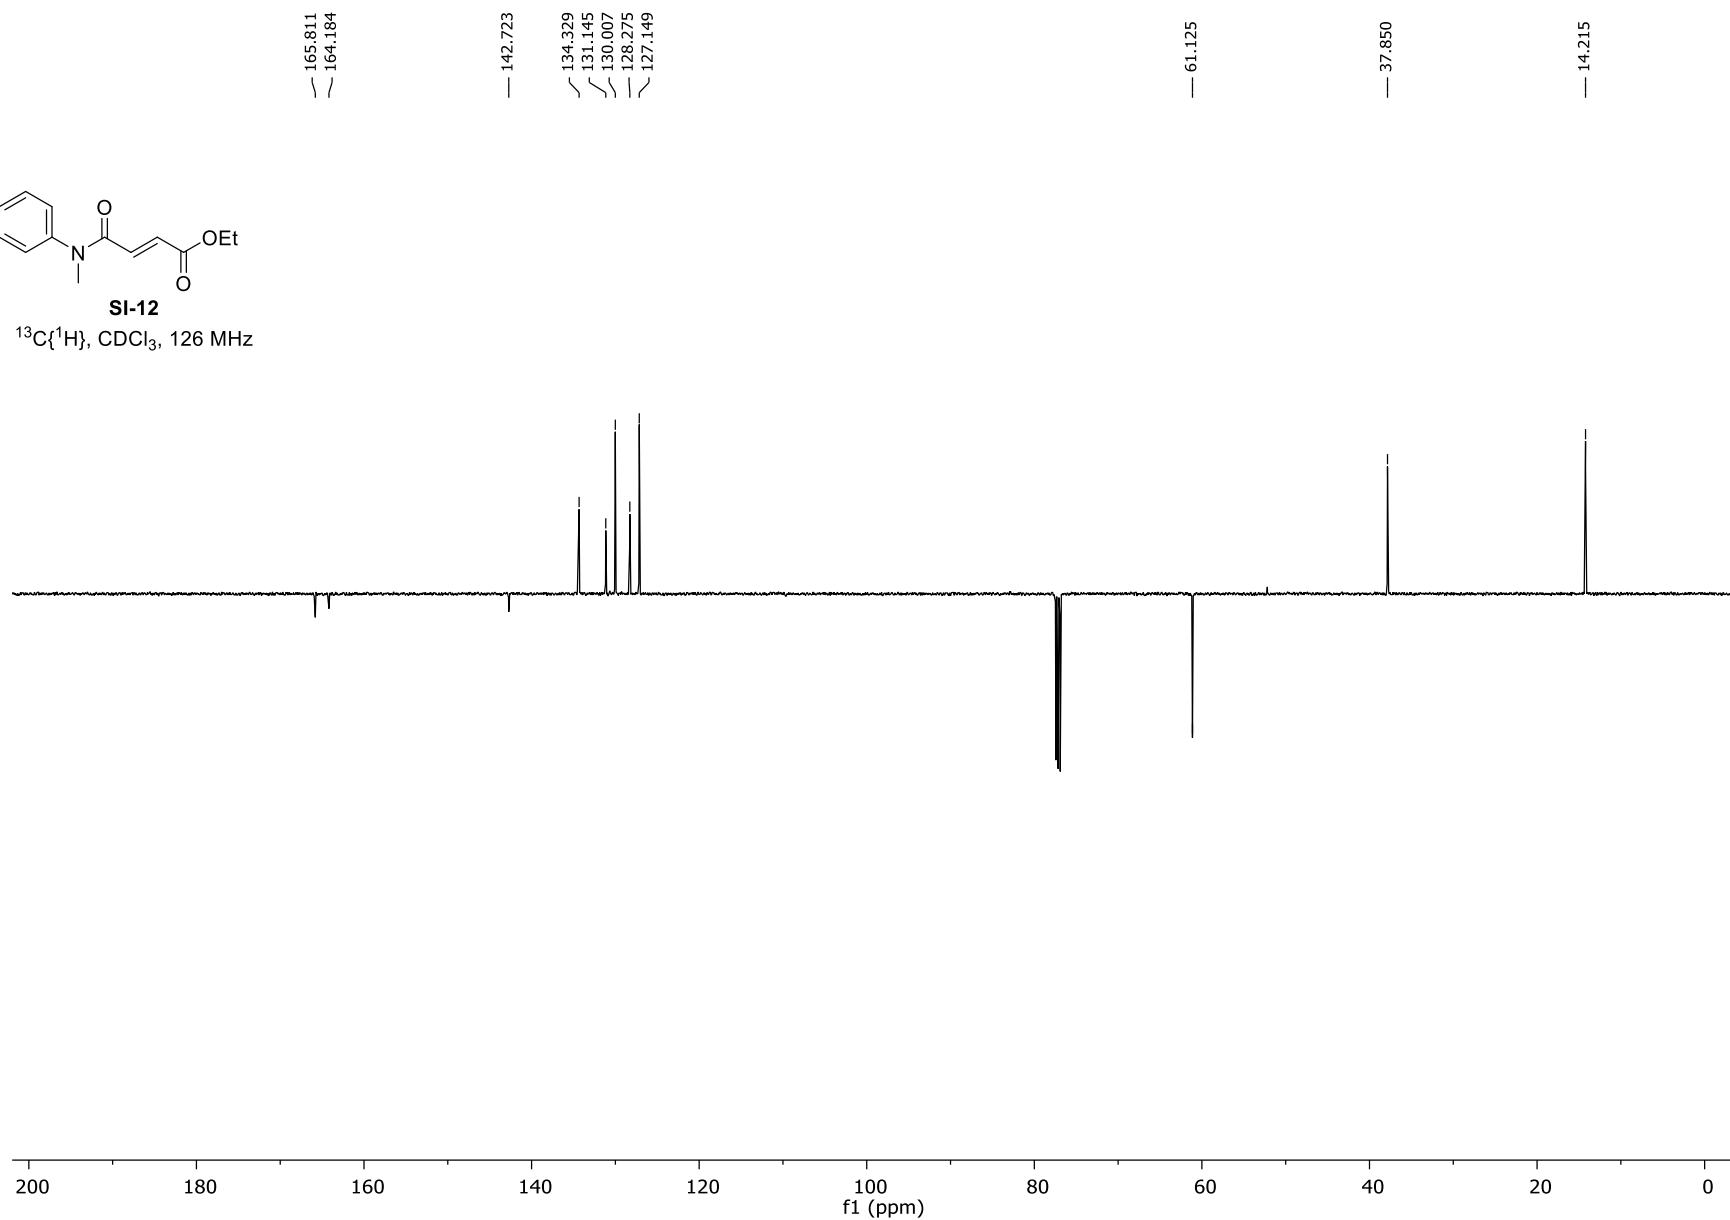

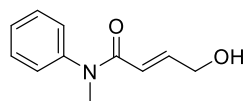

**SI-14**

$^1\text{H}$ ,  $\text{CDCl}_3$ , 500 MHz

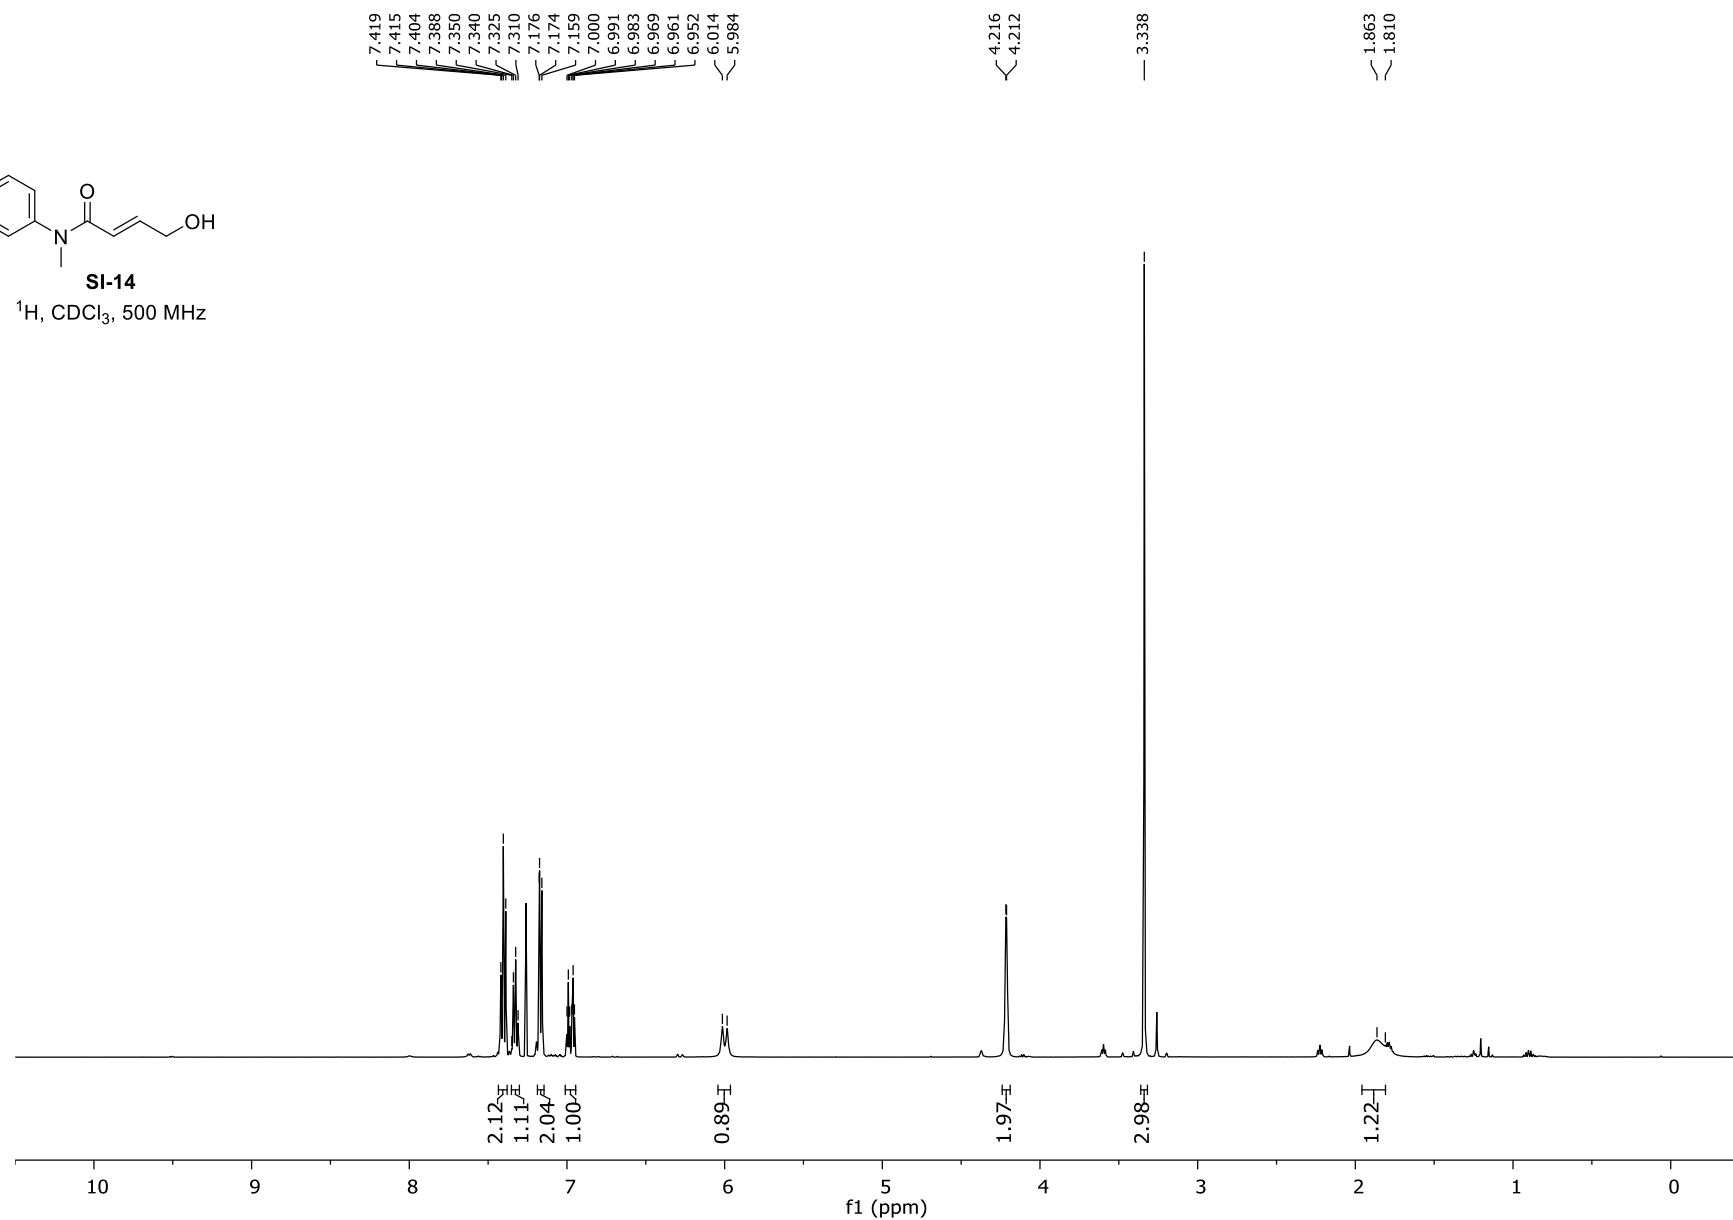

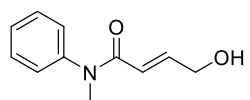

**SI-14**

$^{13}\text{C}\{^1\text{H}\}$ ,  $\text{CDCl}_3$ , 126 MHz

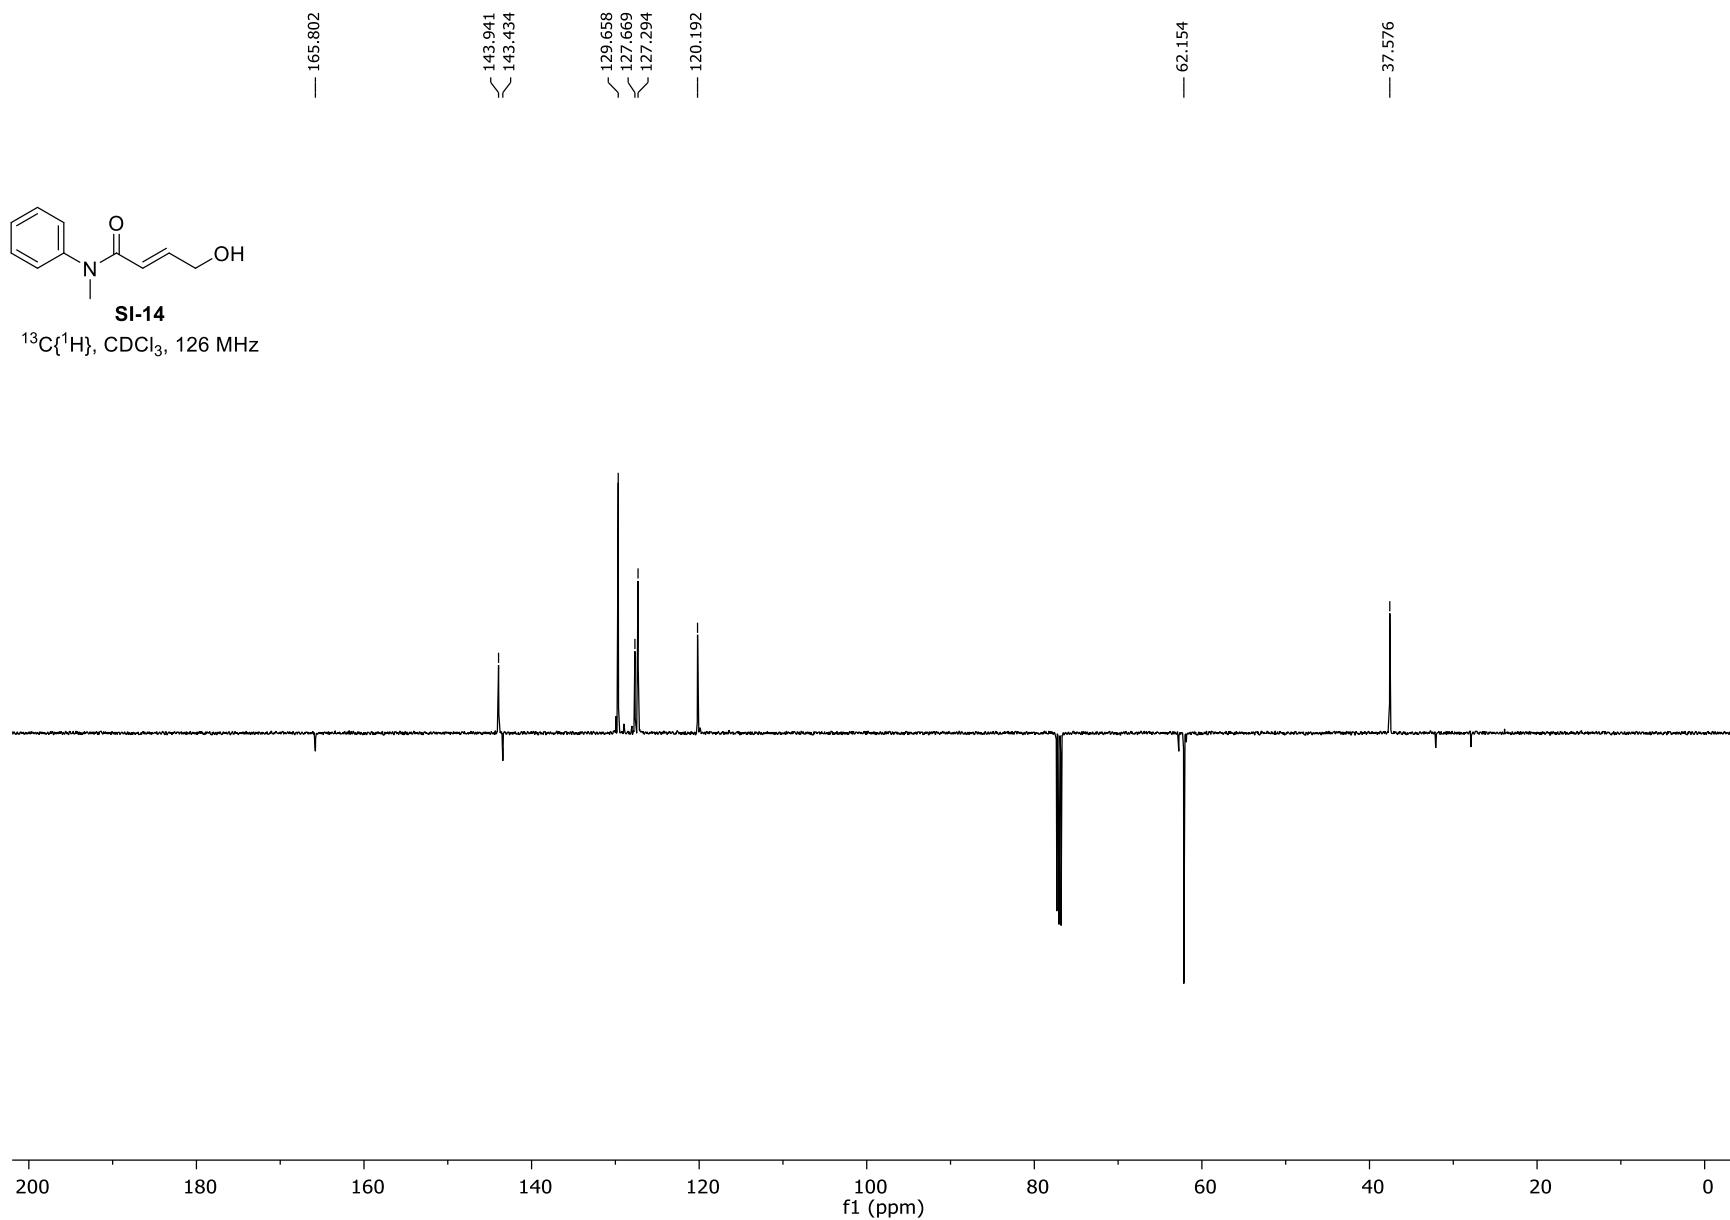

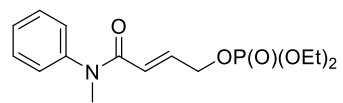

**33**

<sup>1</sup>H, CDCl<sub>3</sub>, 500 MHz

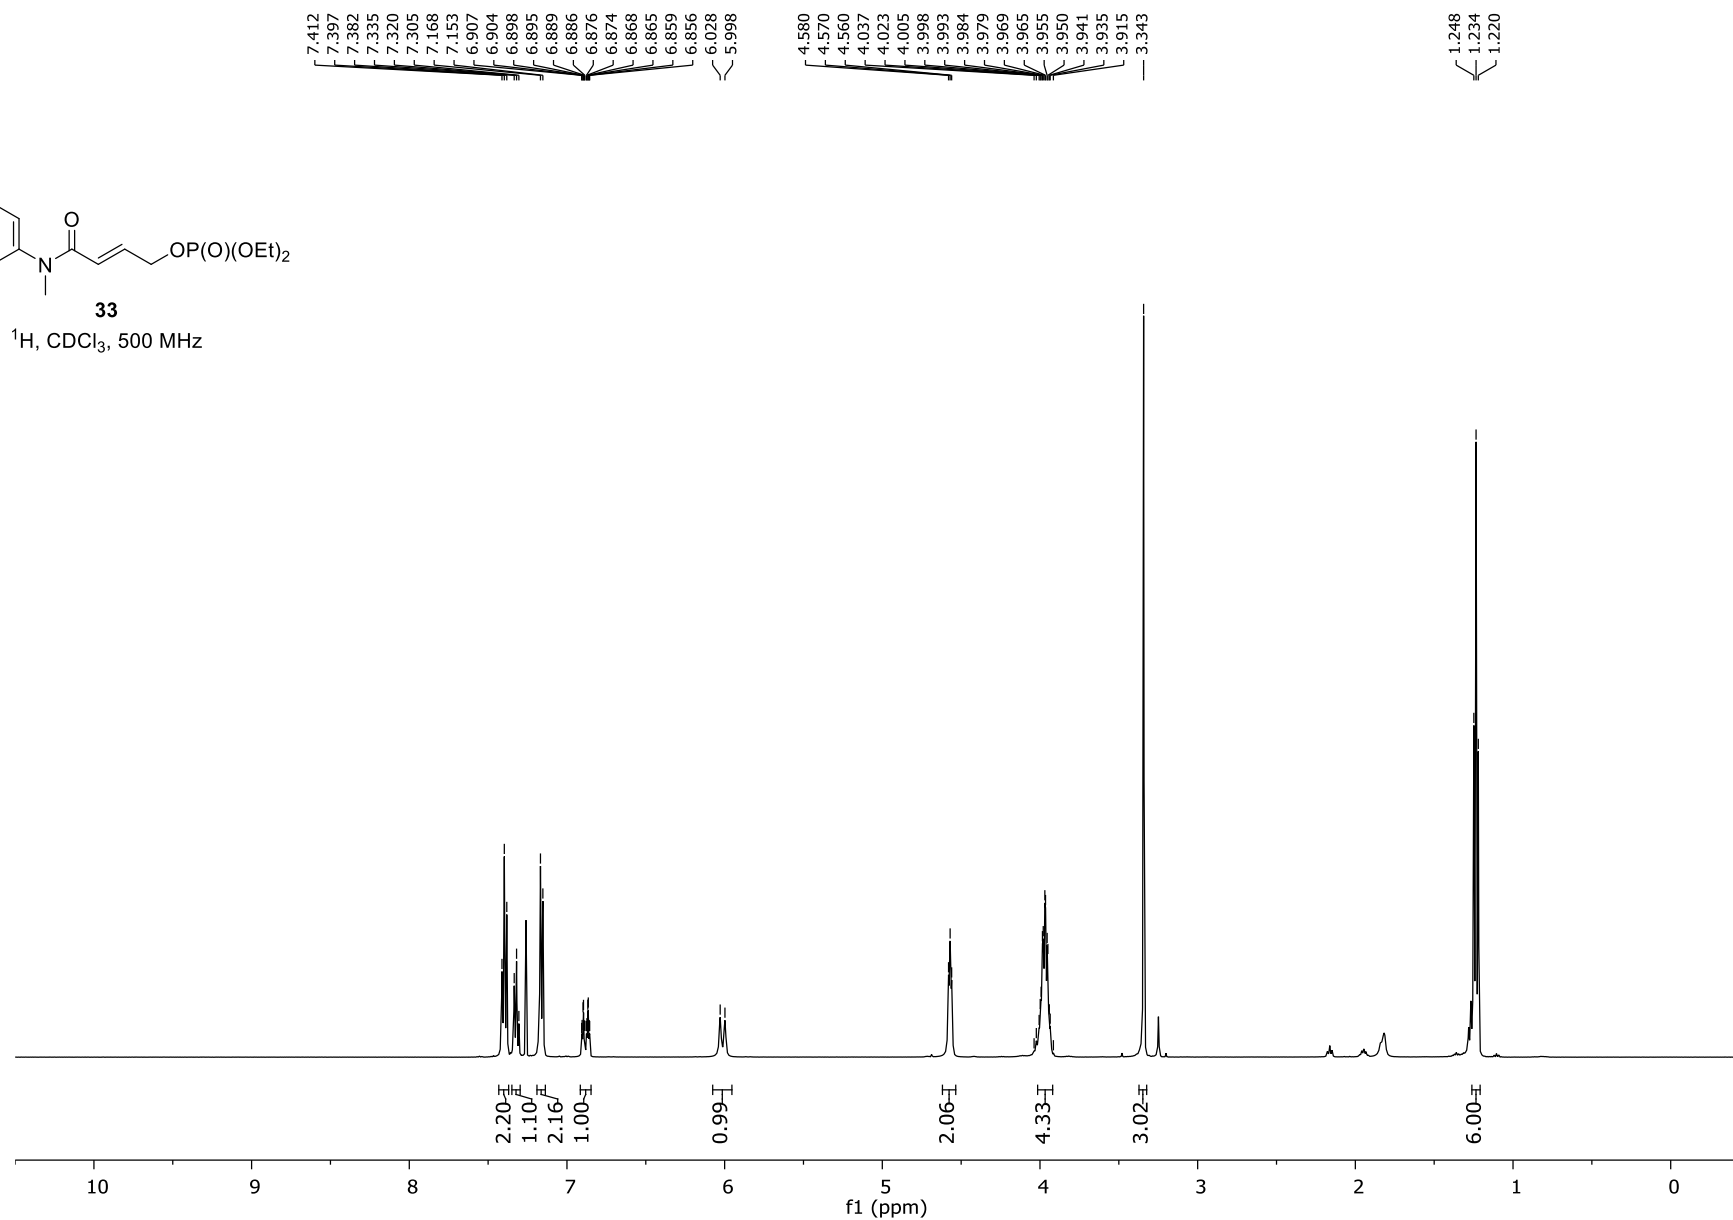

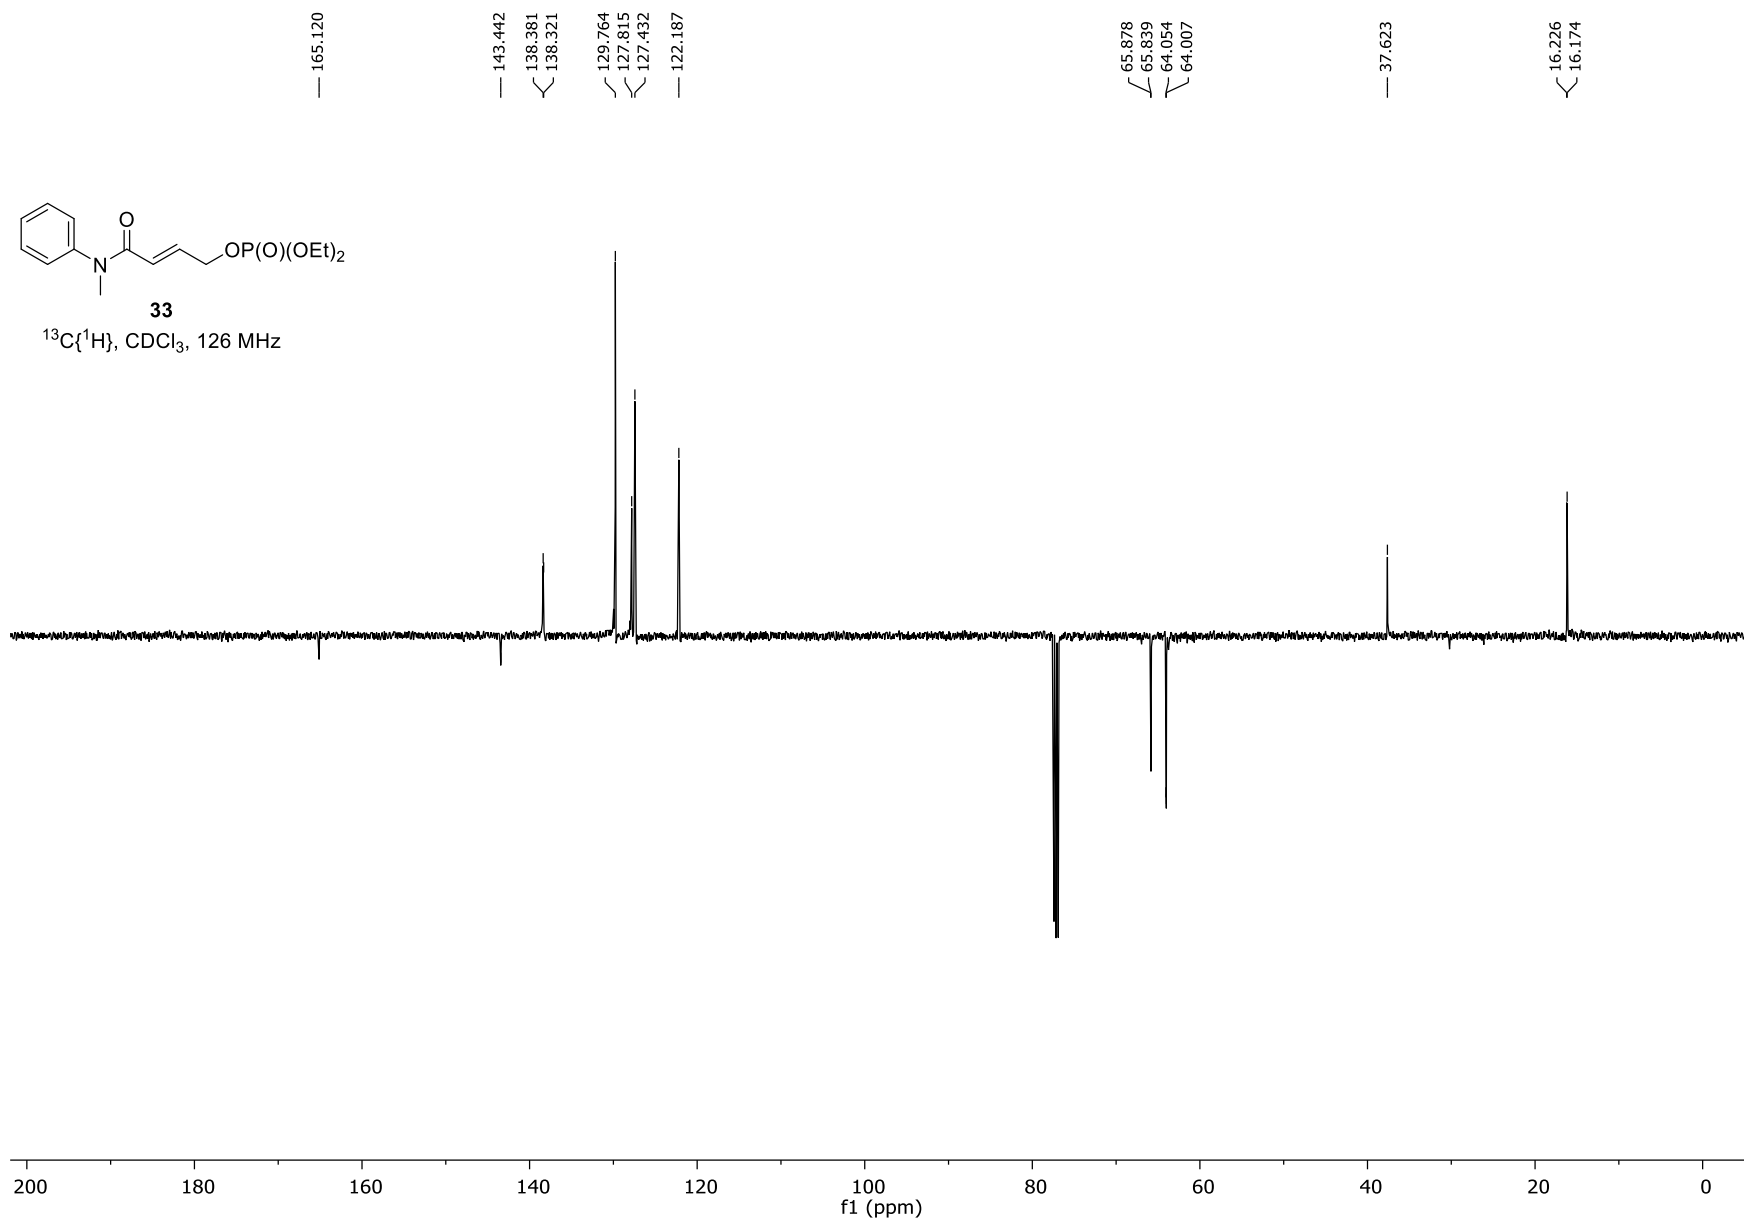

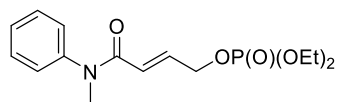

**33**

$^{31}\text{P}\{^1\text{H}\}$ ,  $\text{CDCl}_3$ , 202 MHz

— -1.264

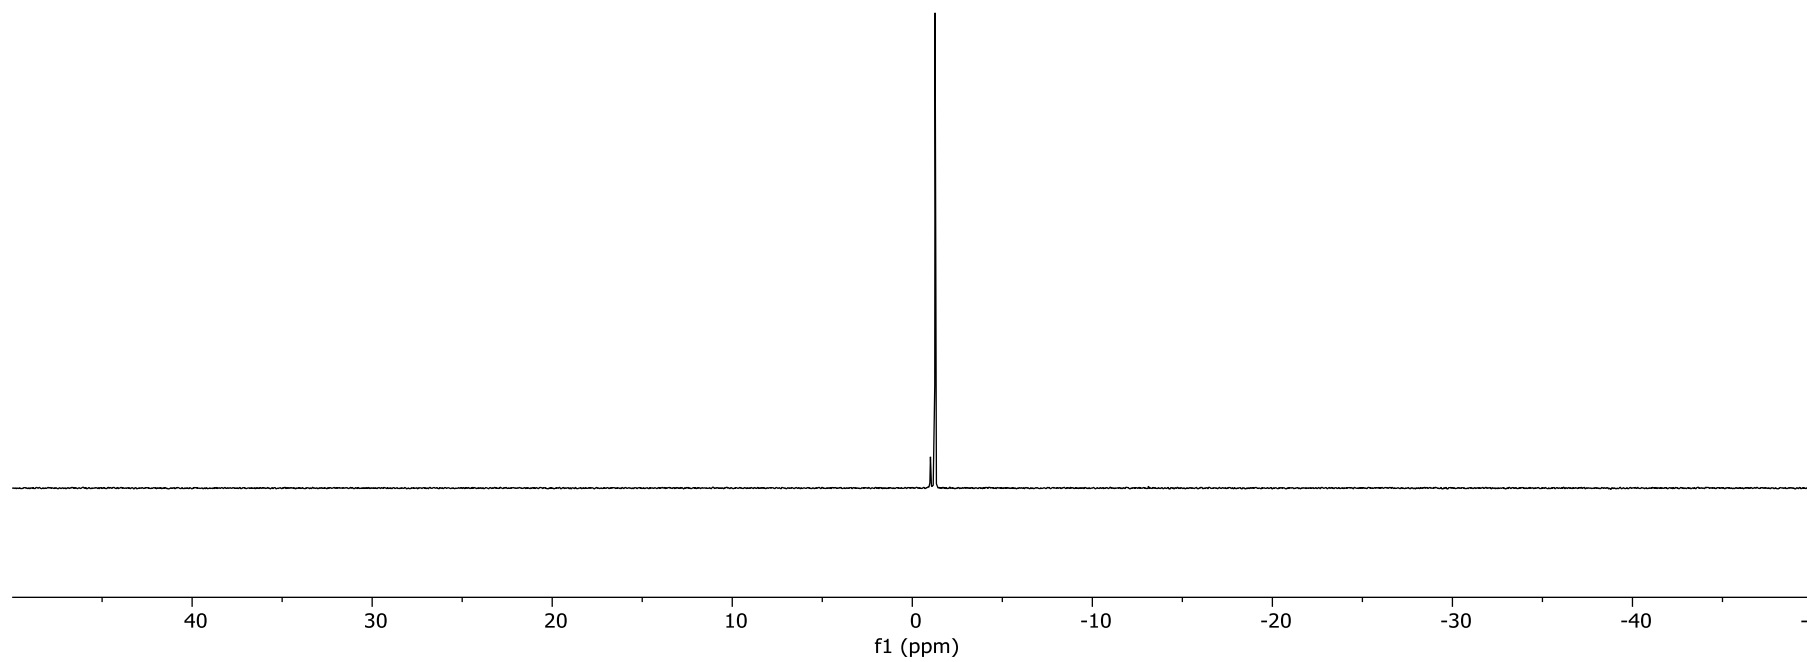

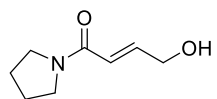

**SI-20**

$^1\text{H}$ ,  $\text{CDCl}_3$ , 500 MHz

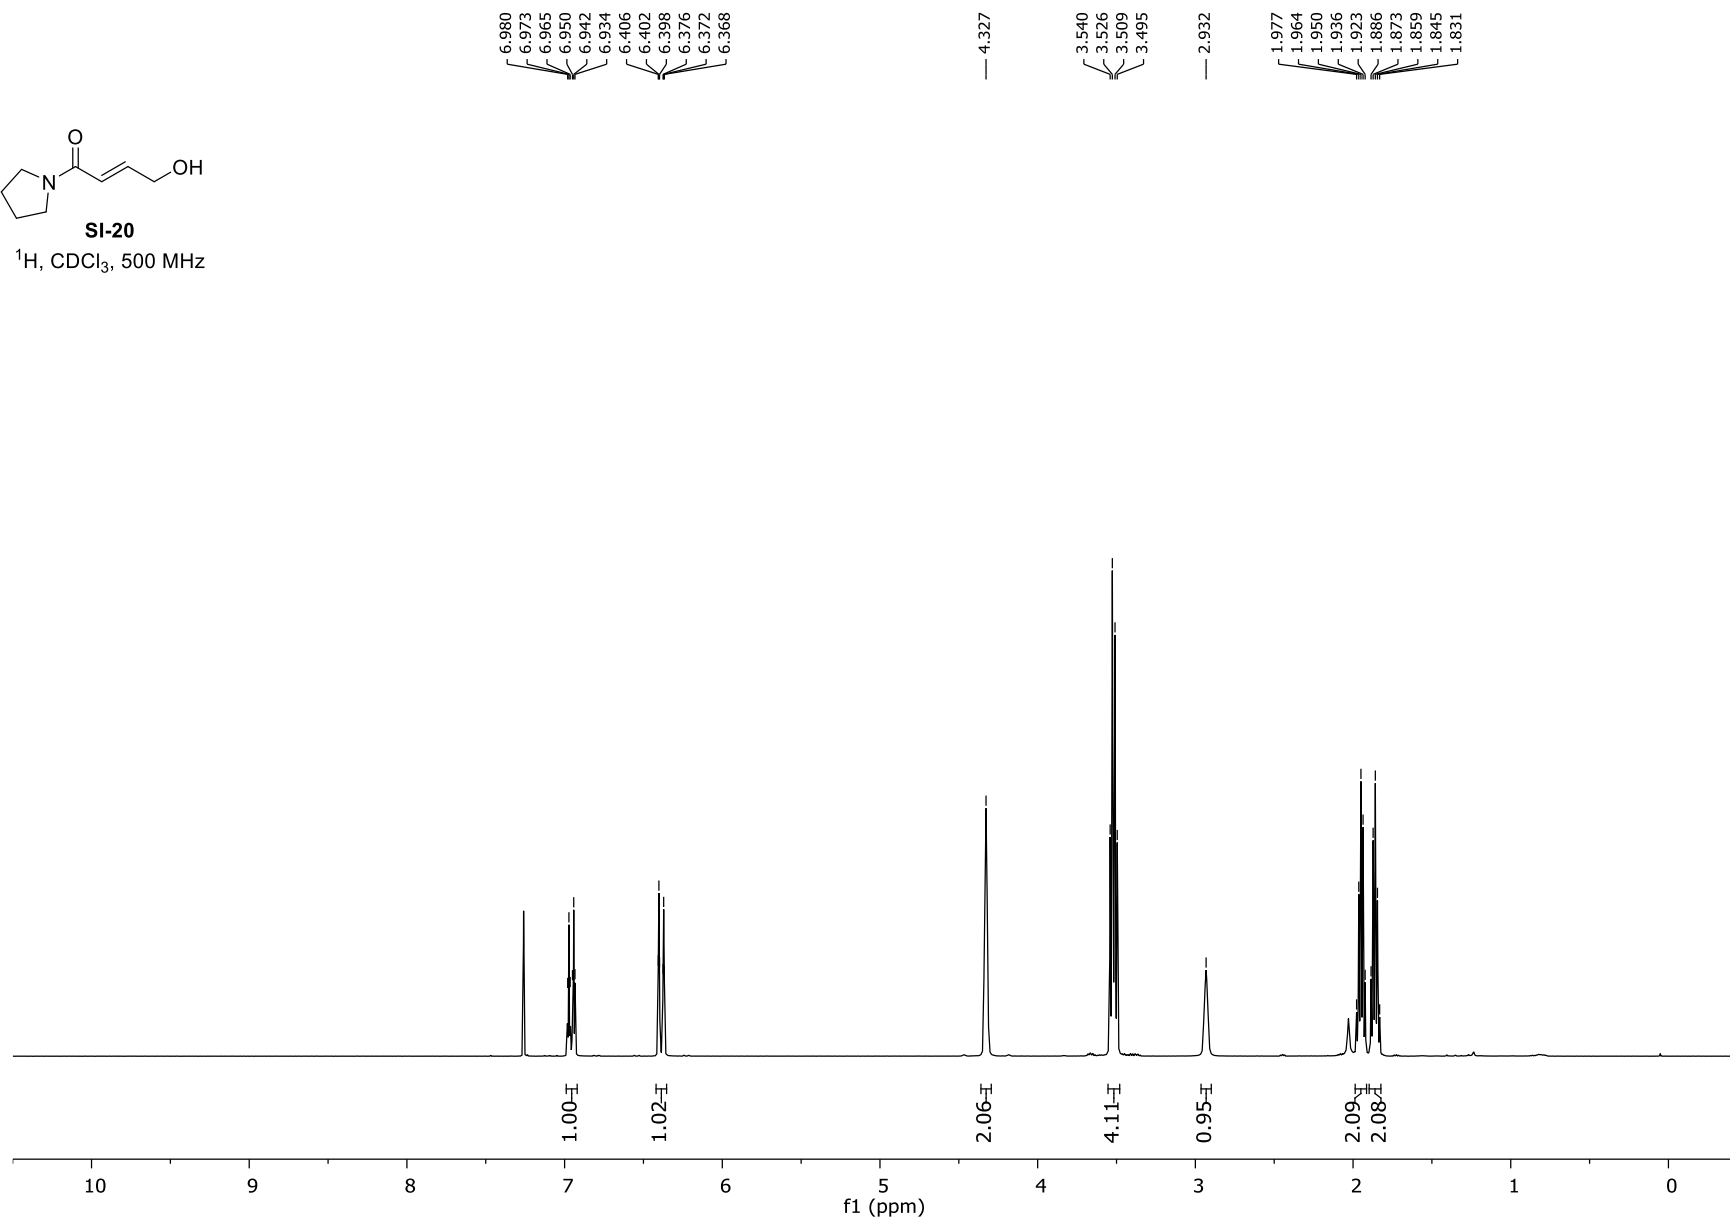



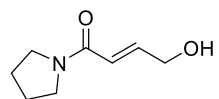

**SI-20**

$^{13}\text{C}\{^1\text{H}\}$ ,  $\text{CDCl}_3$ , 126 MHz

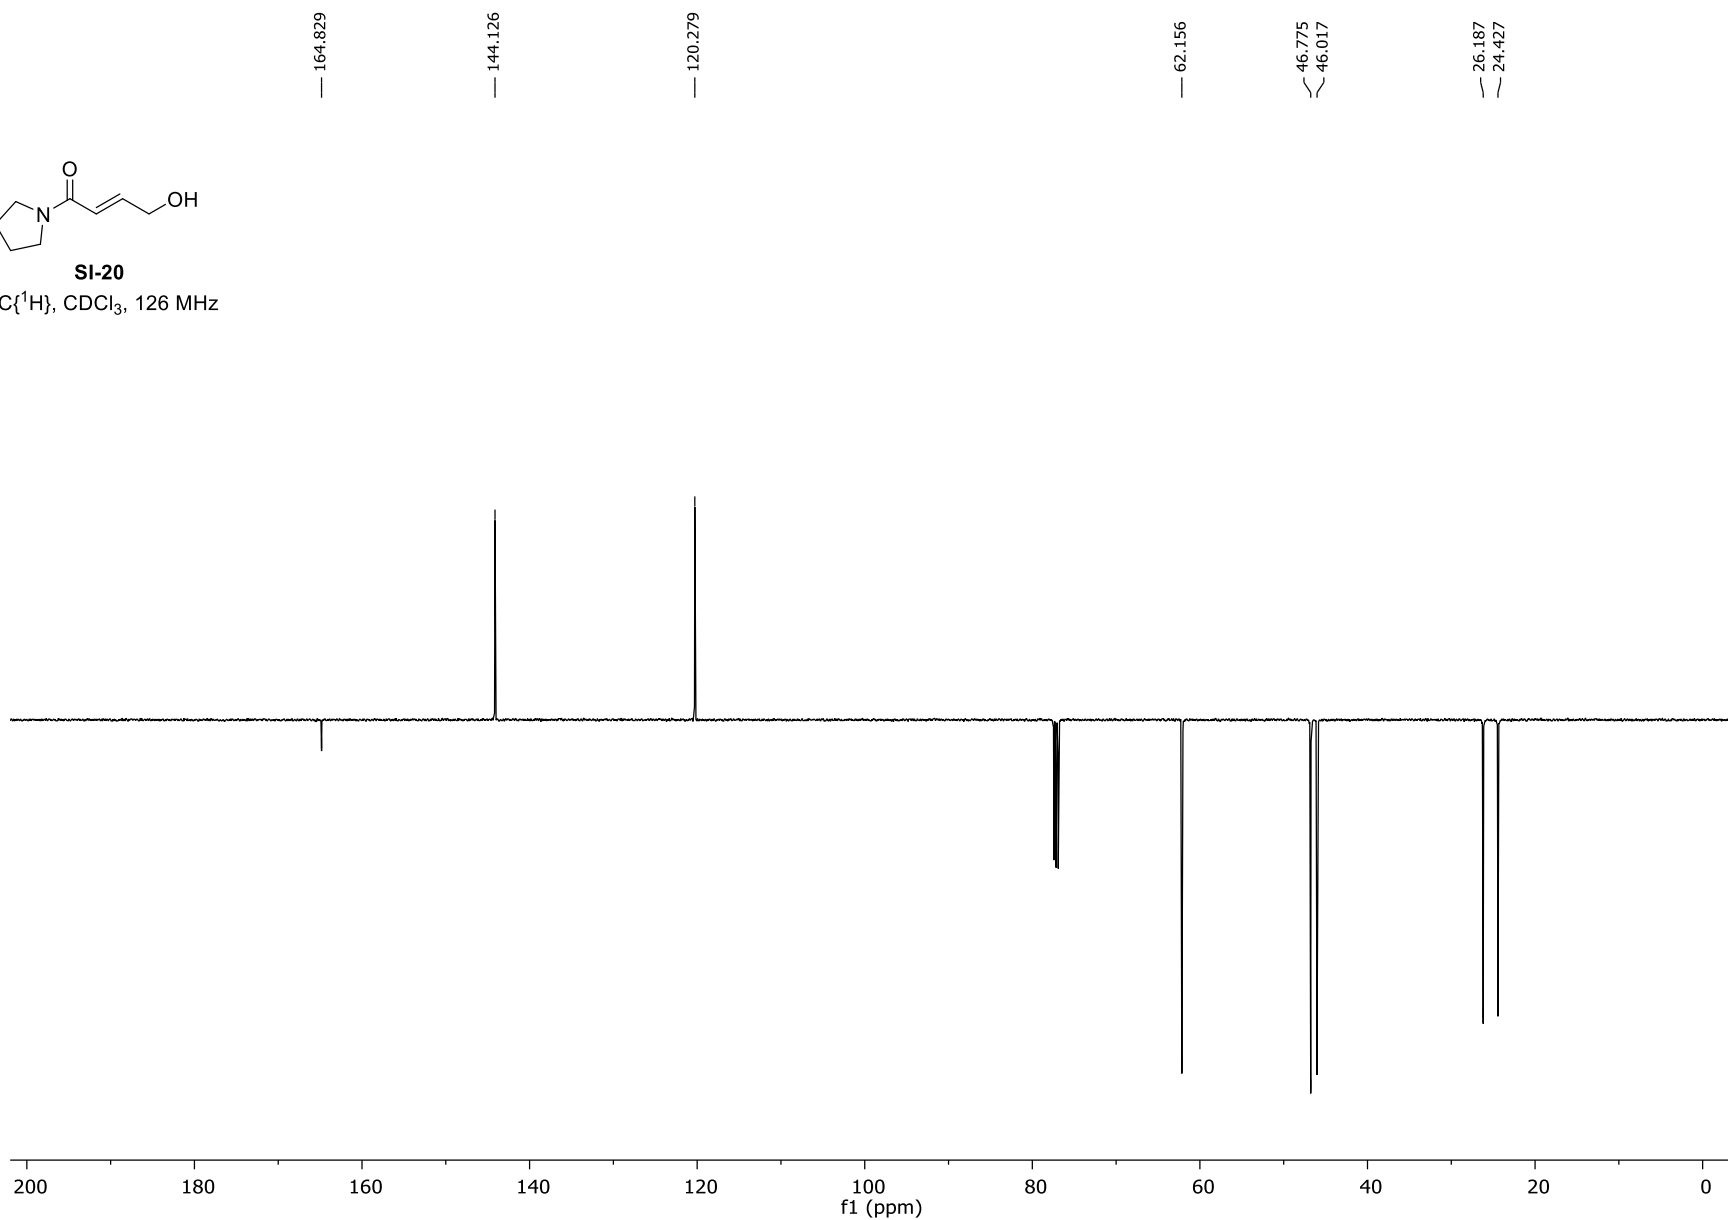

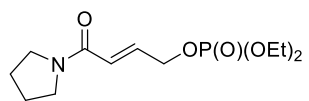

**35**

$^1\text{H}$ ,  $\text{CDCl}_3$ , 500 MHz

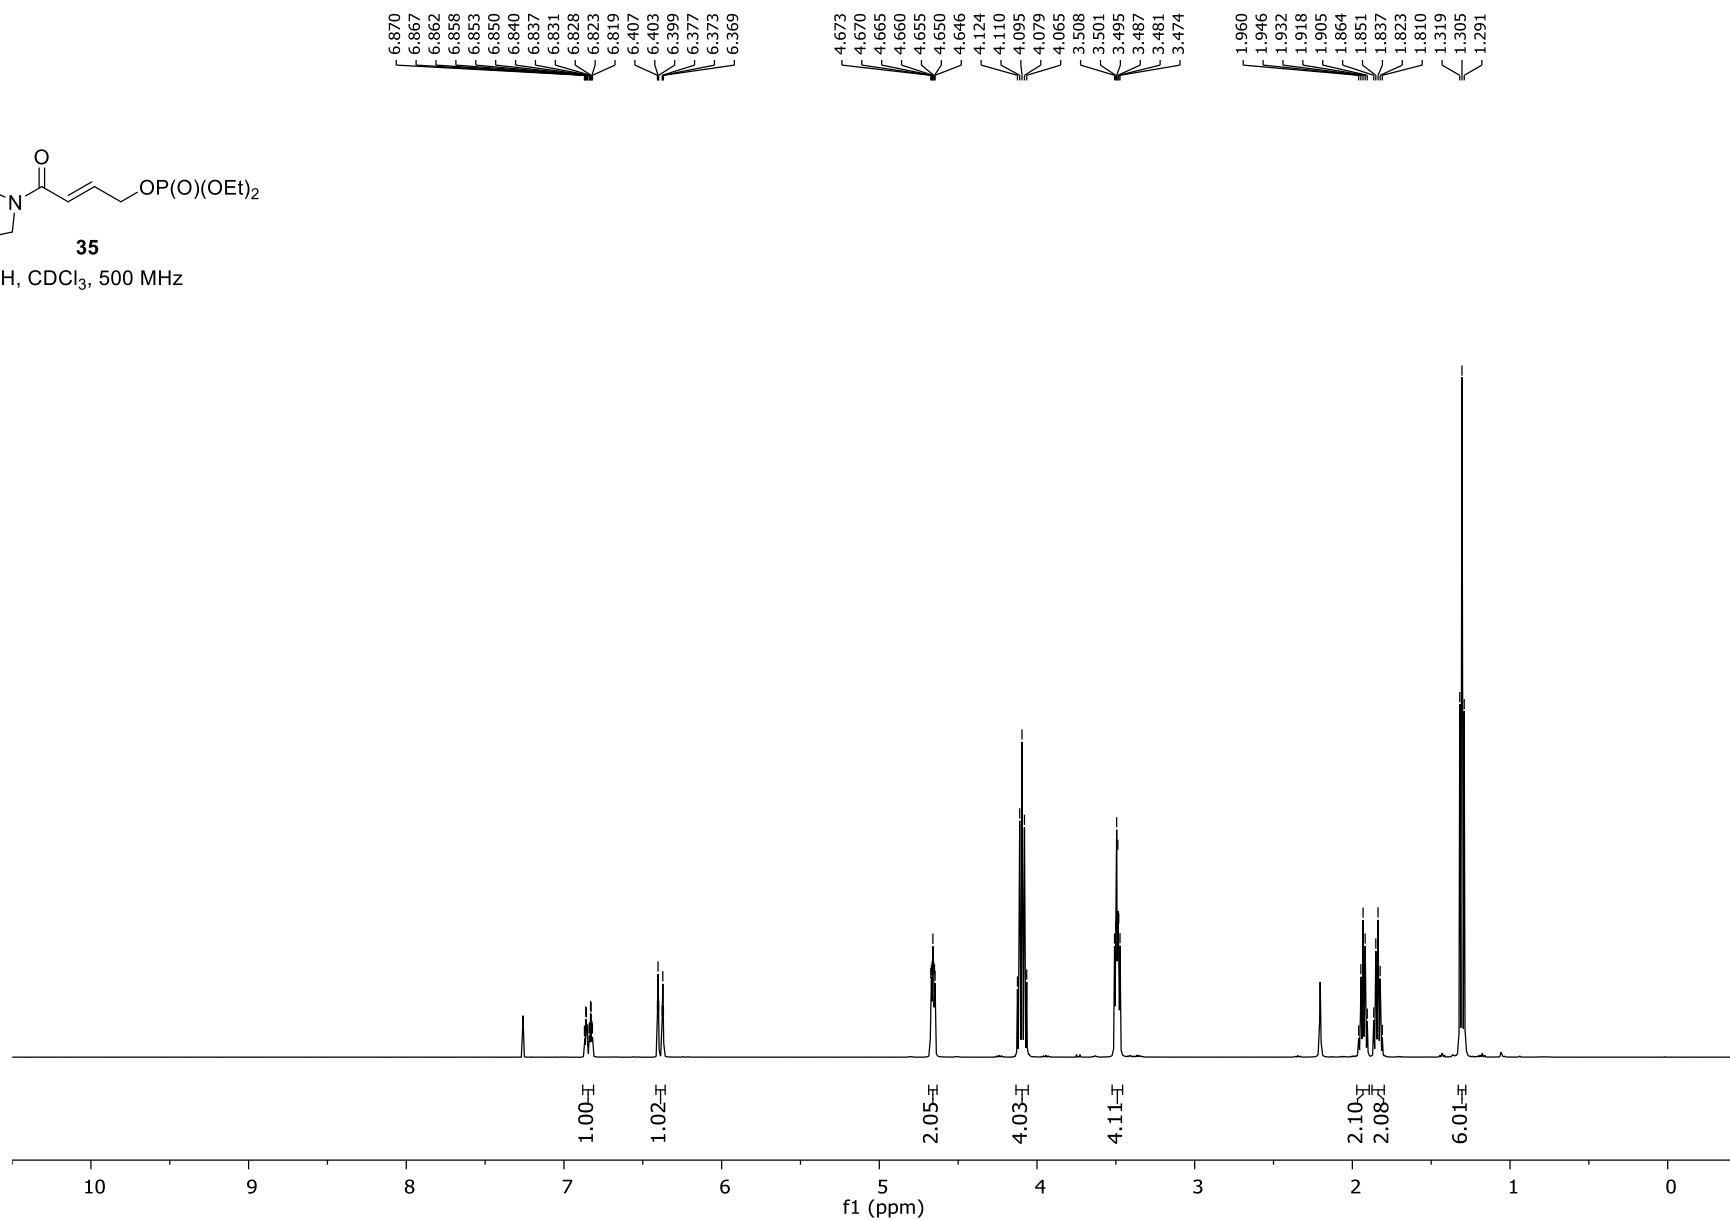

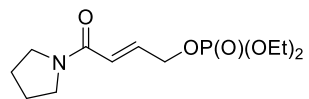

$^{13}\text{C}\{^1\text{H}\}$ ,  $\text{CDCl}_3$ , 126 MHz

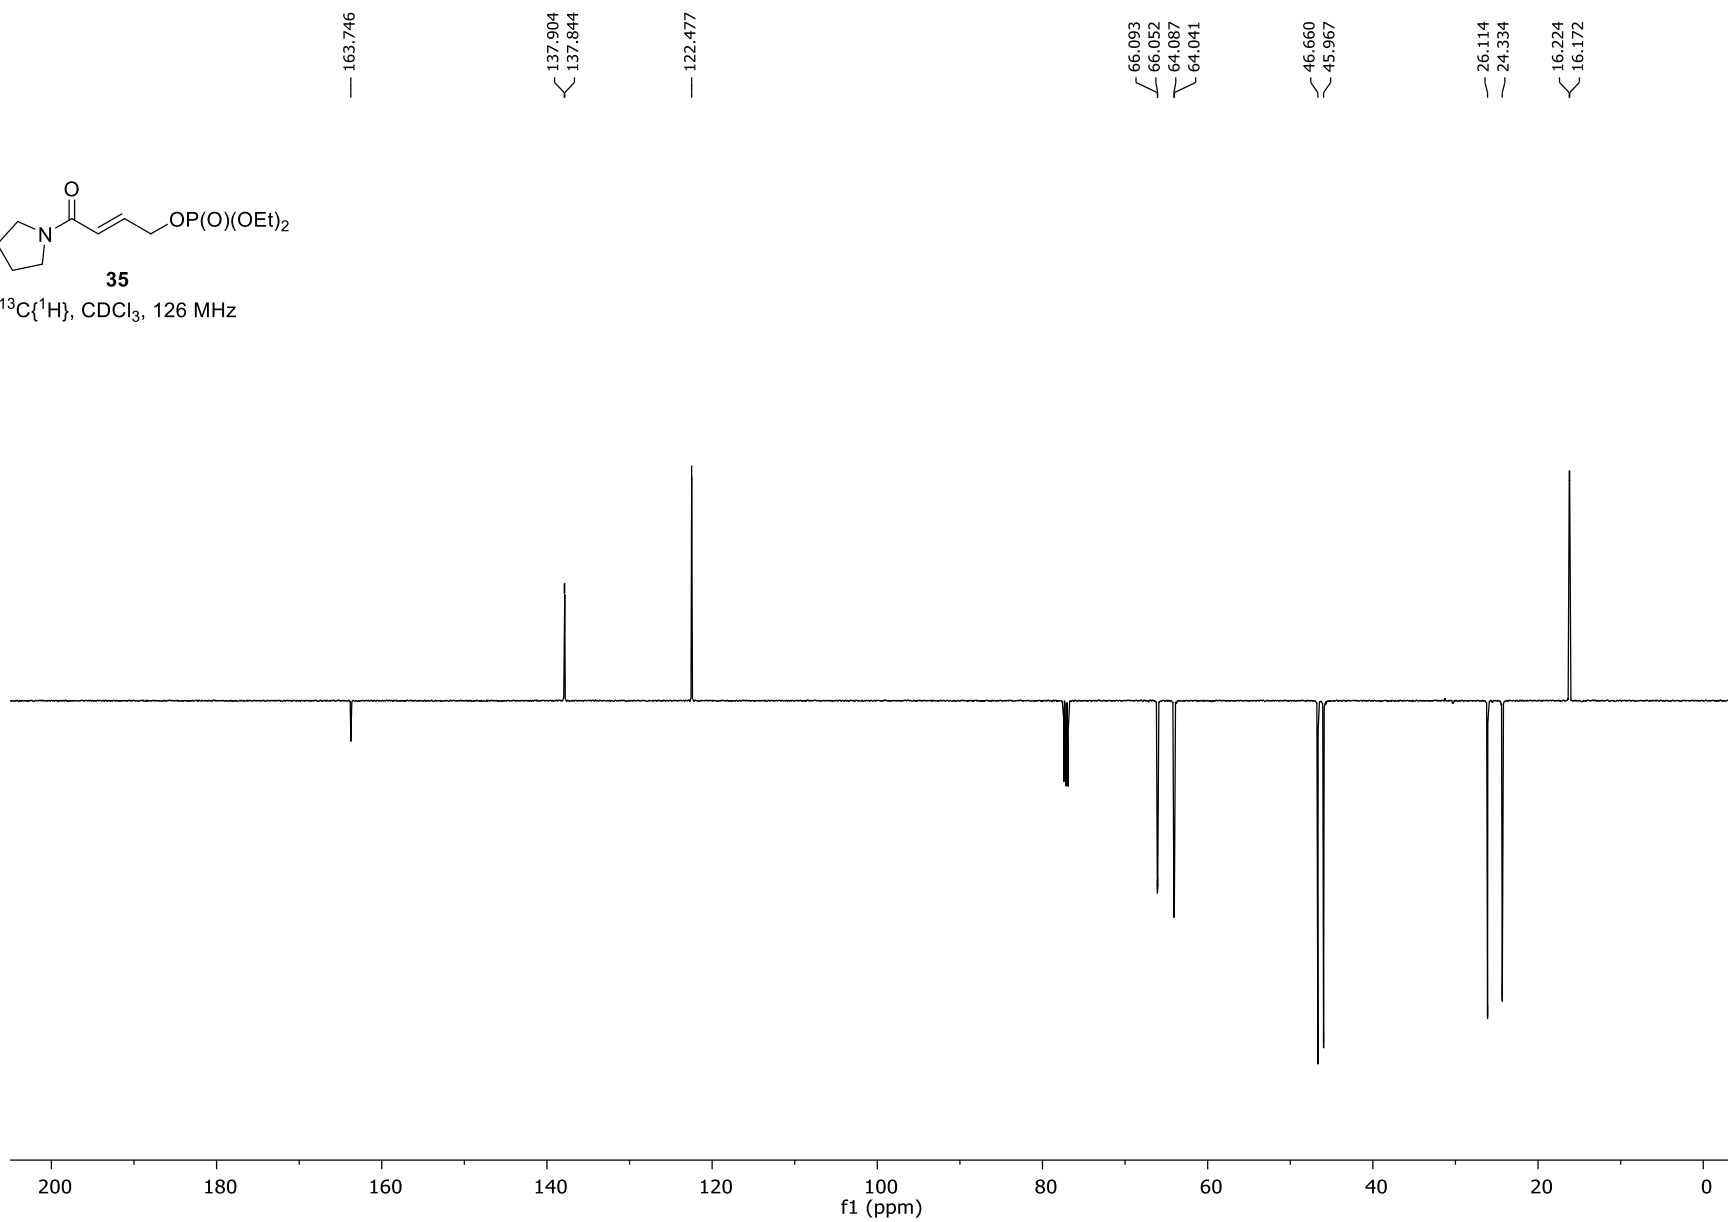

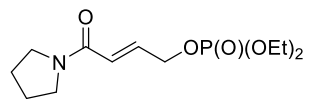

**35**

$^{31}\text{P}\{^1\text{H}\}$ ,  $\text{CDCl}_3$ , 202 MHz

— -1.116

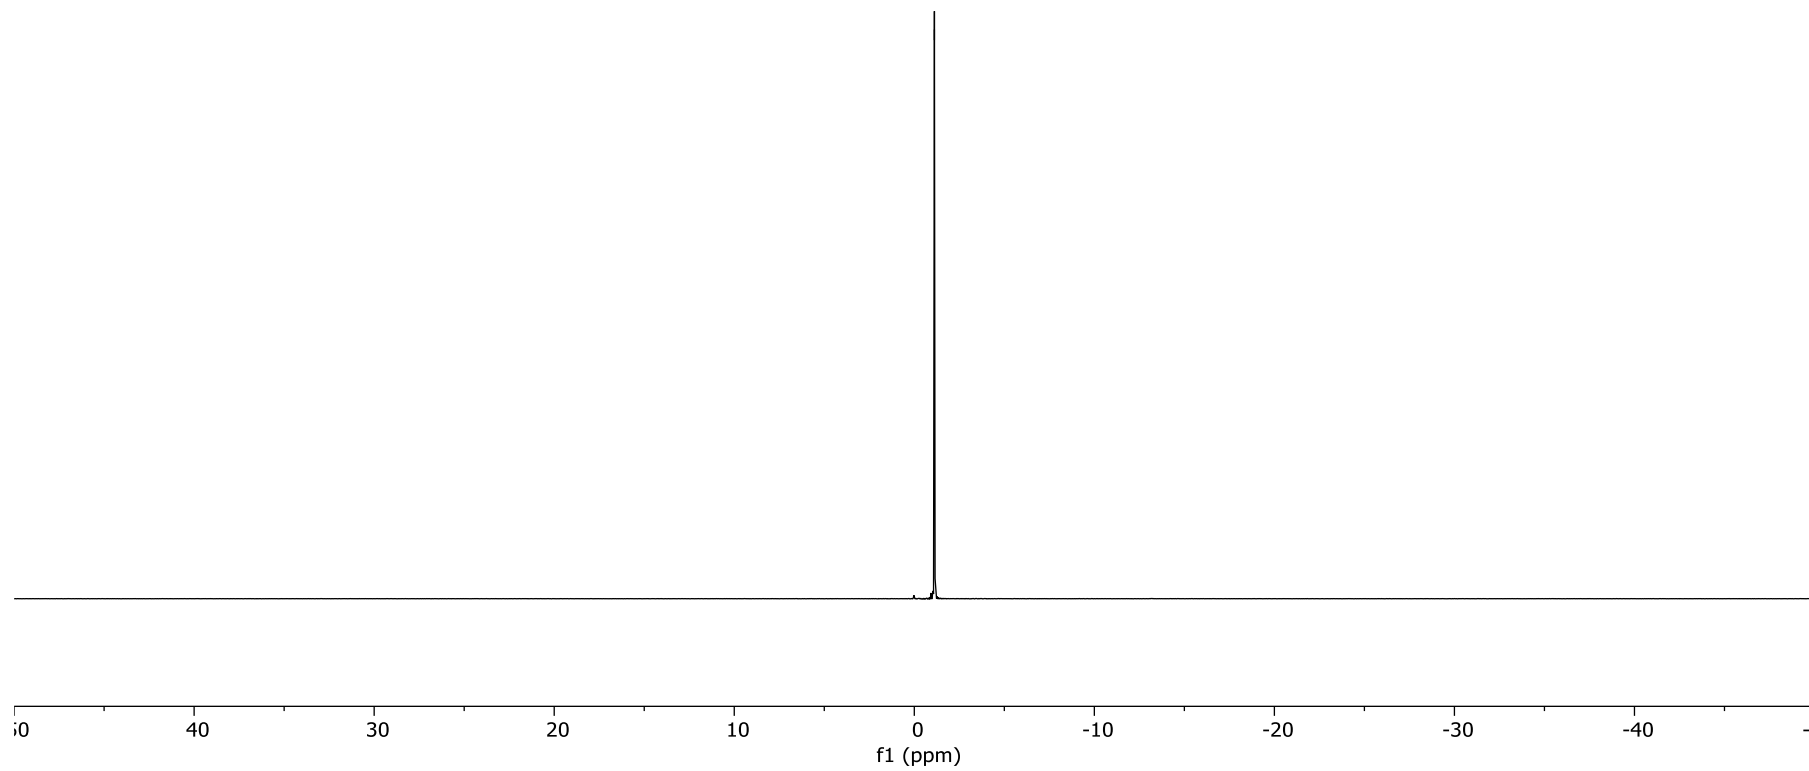

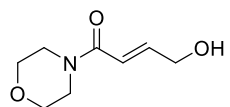

**SI-23**

$^1\text{H}$ ,  $\text{CDCl}_3$ , 500 MHz

6.960  
6.952  
6.945  
6.930  
6.922  
6.915  
6.535  
6.530  
6.526  
6.504  
6.500  
6.496

4.345  
4.340  
4.337  
4.333

3.702  
3.676  
3.573

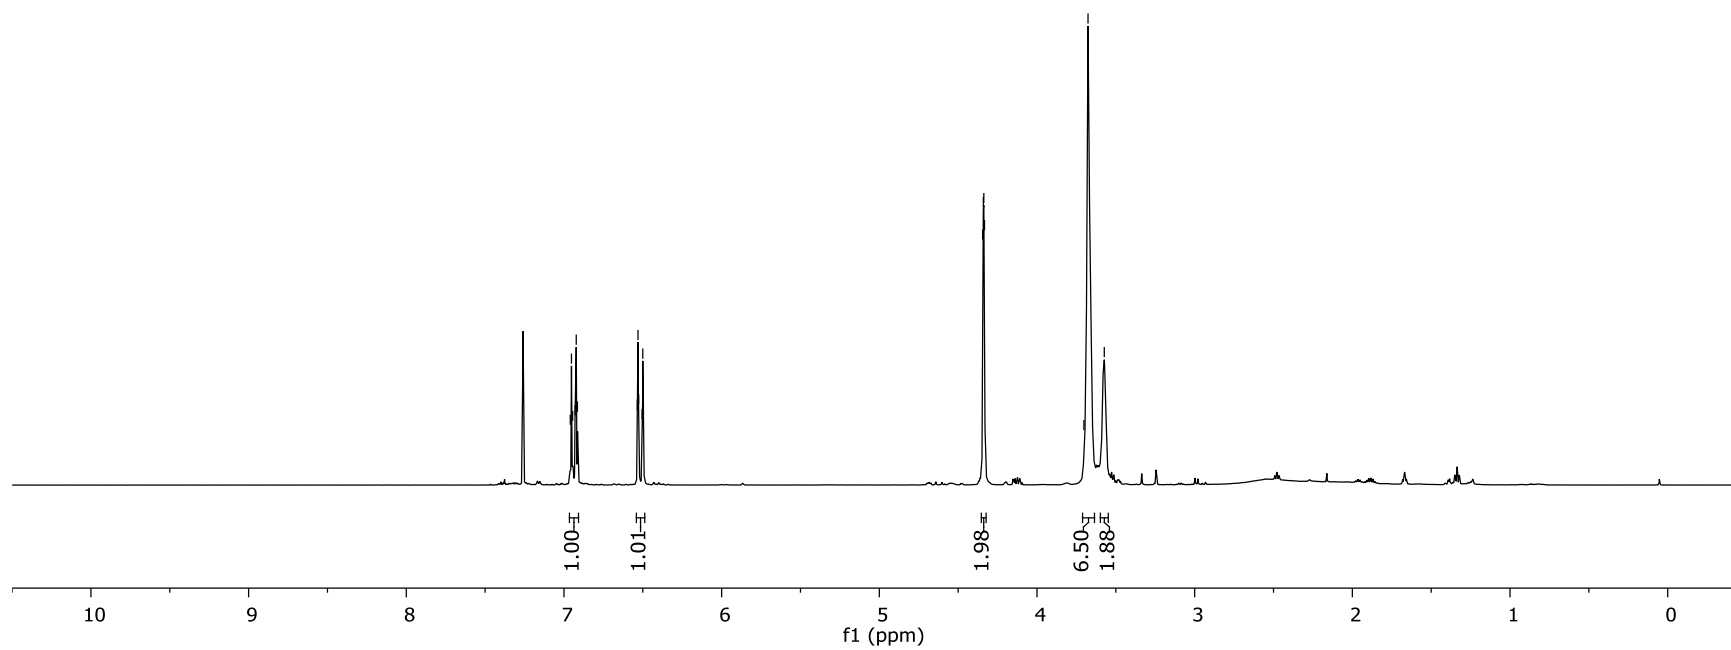

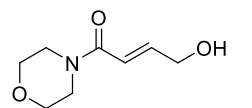

**SI-23**

$^{13}\text{C}\{^1\text{H}\}$ ,  $\text{CDCl}_3$ , 126 MHz

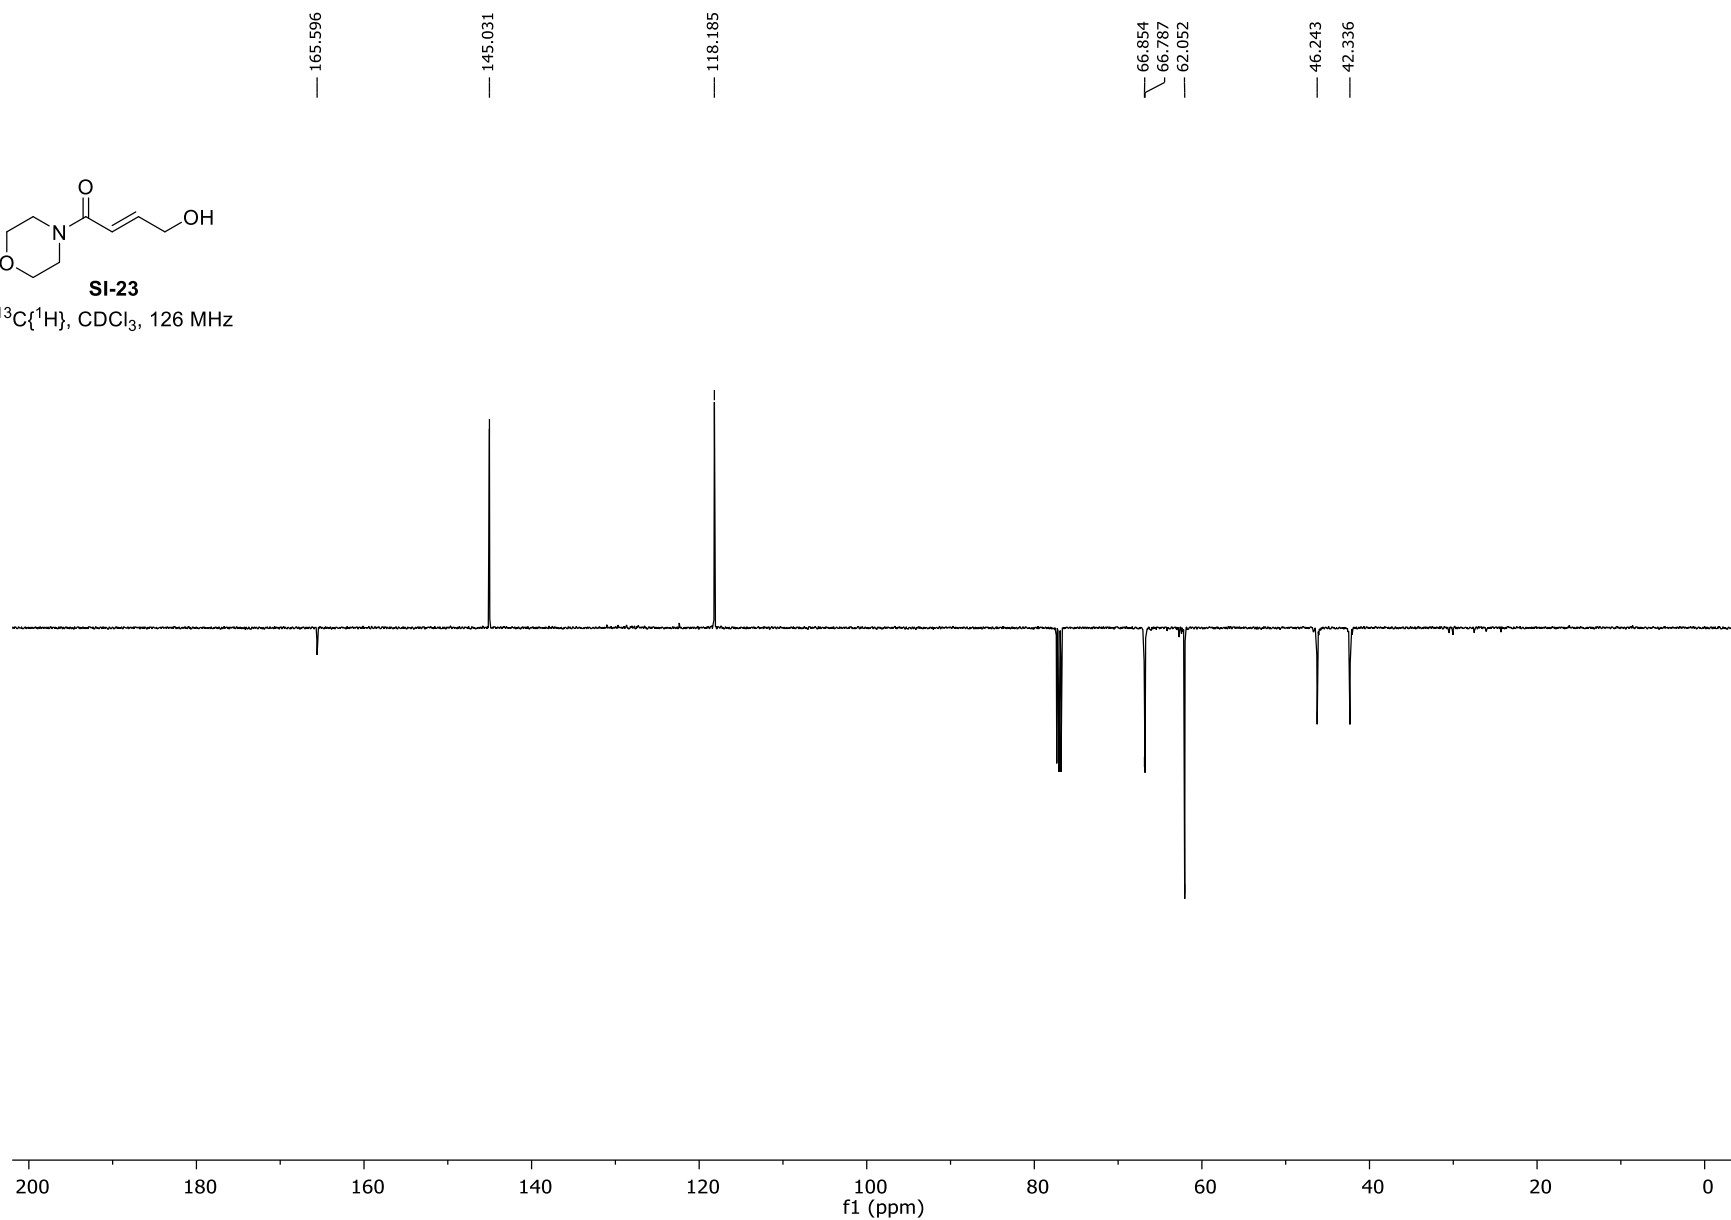

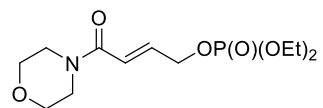

$^1\text{H}$ ,  $\text{CDCl}_3$ , 500 MHz

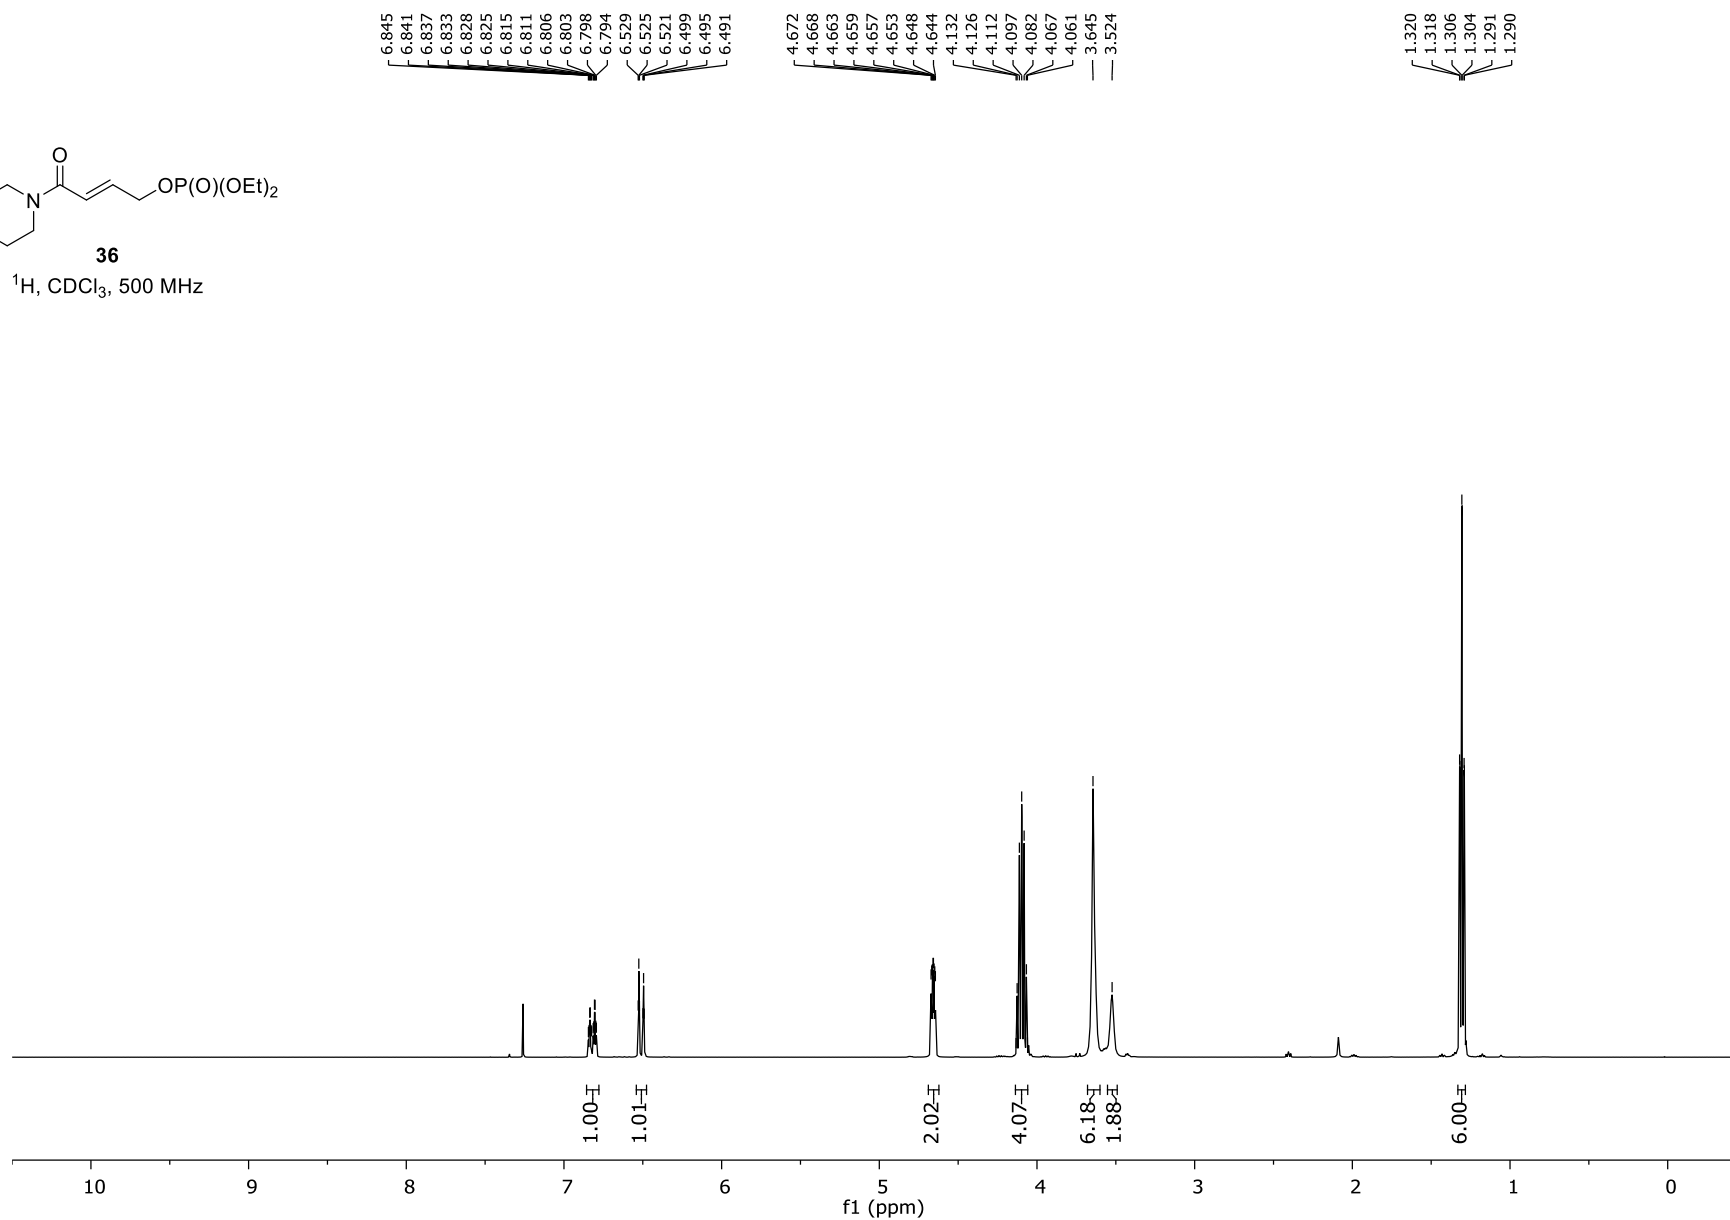

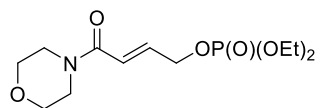

**36**

$^{13}\text{C}\{^1\text{H}\}$ ,  $\text{CDCl}_3$ , 126 MHz

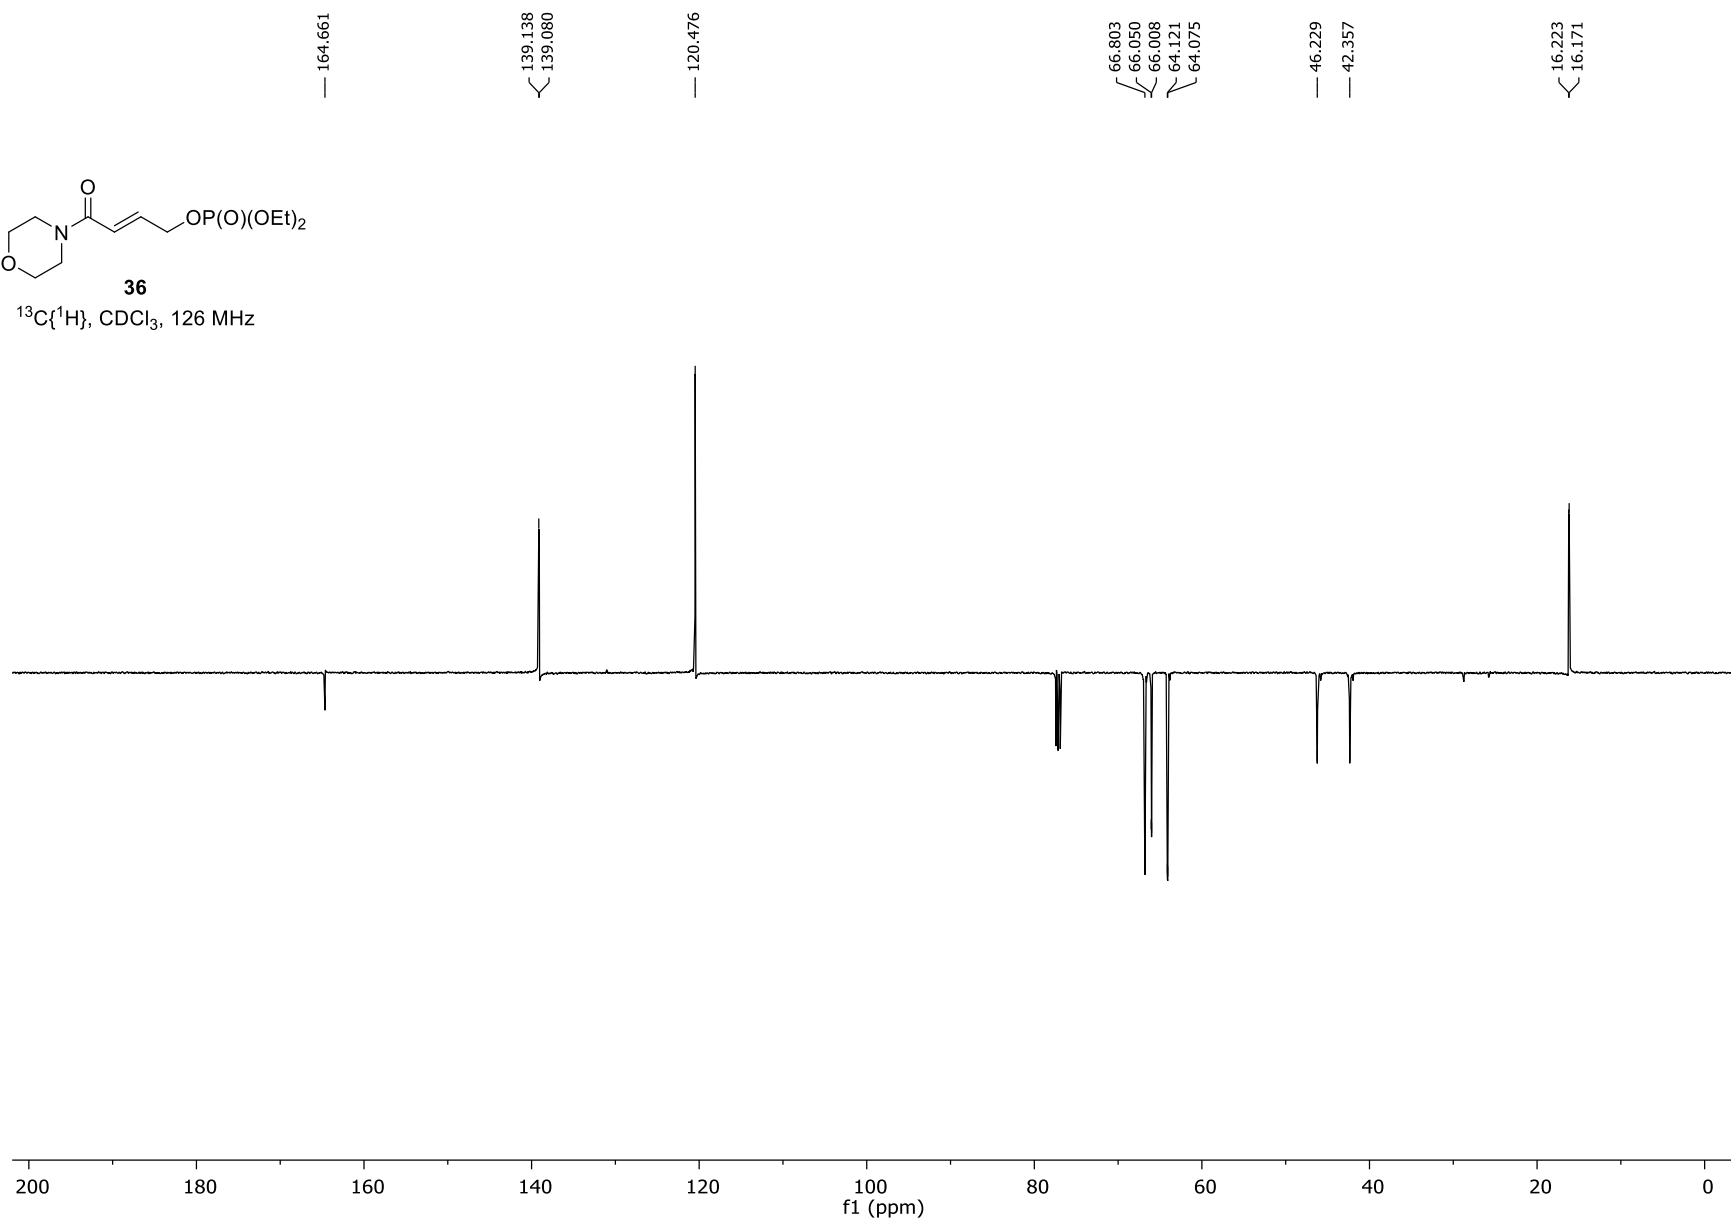



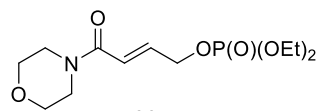

**36**

$^{31}\text{P}\{^1\text{H}\}$ ,  $\text{CDCl}_3$ , 202 MHz

— -1.118

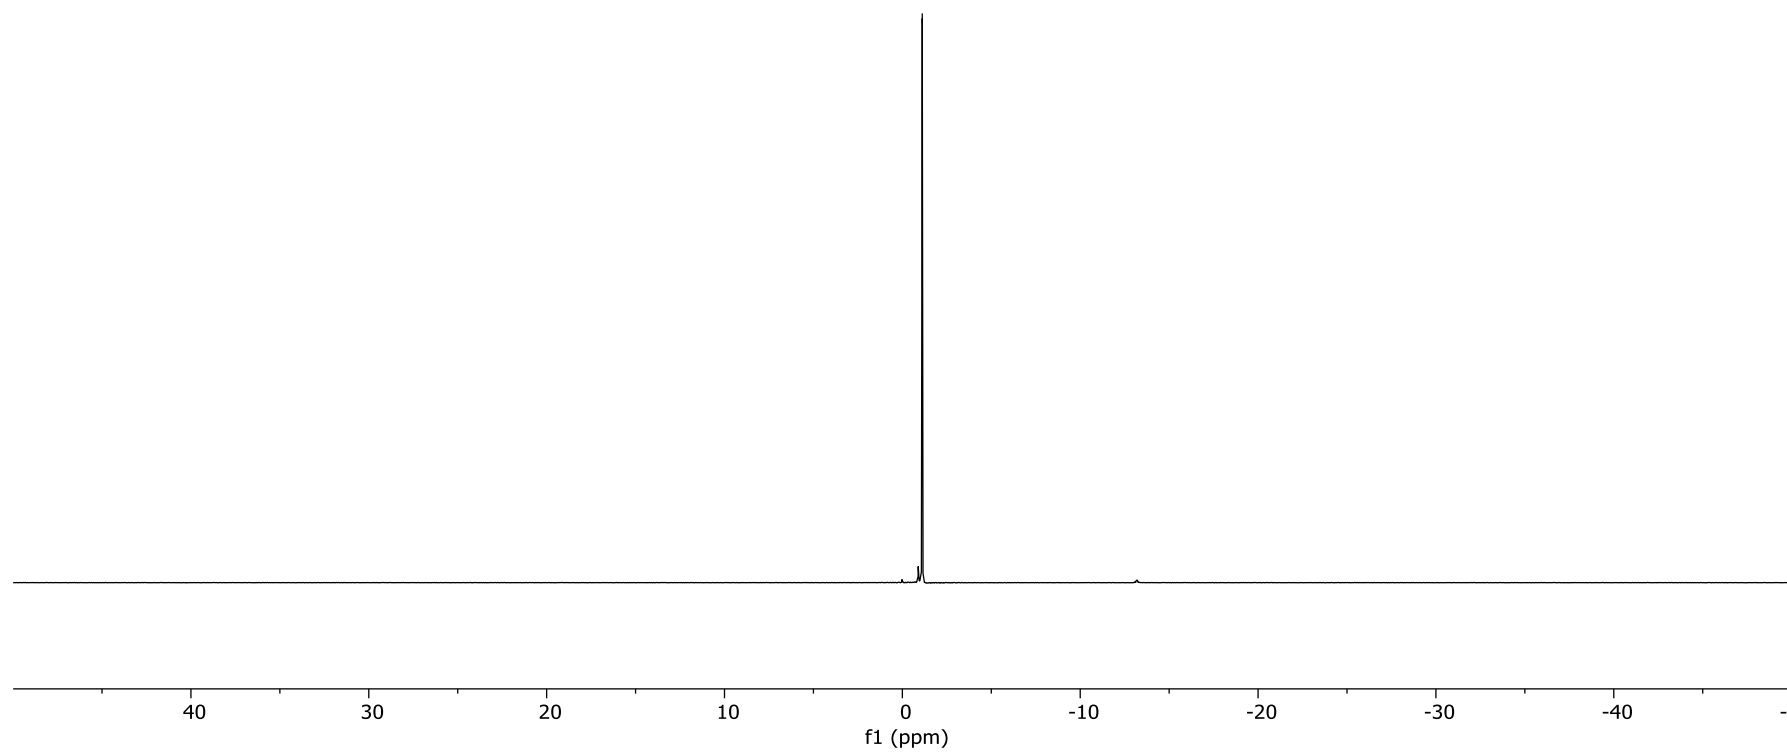

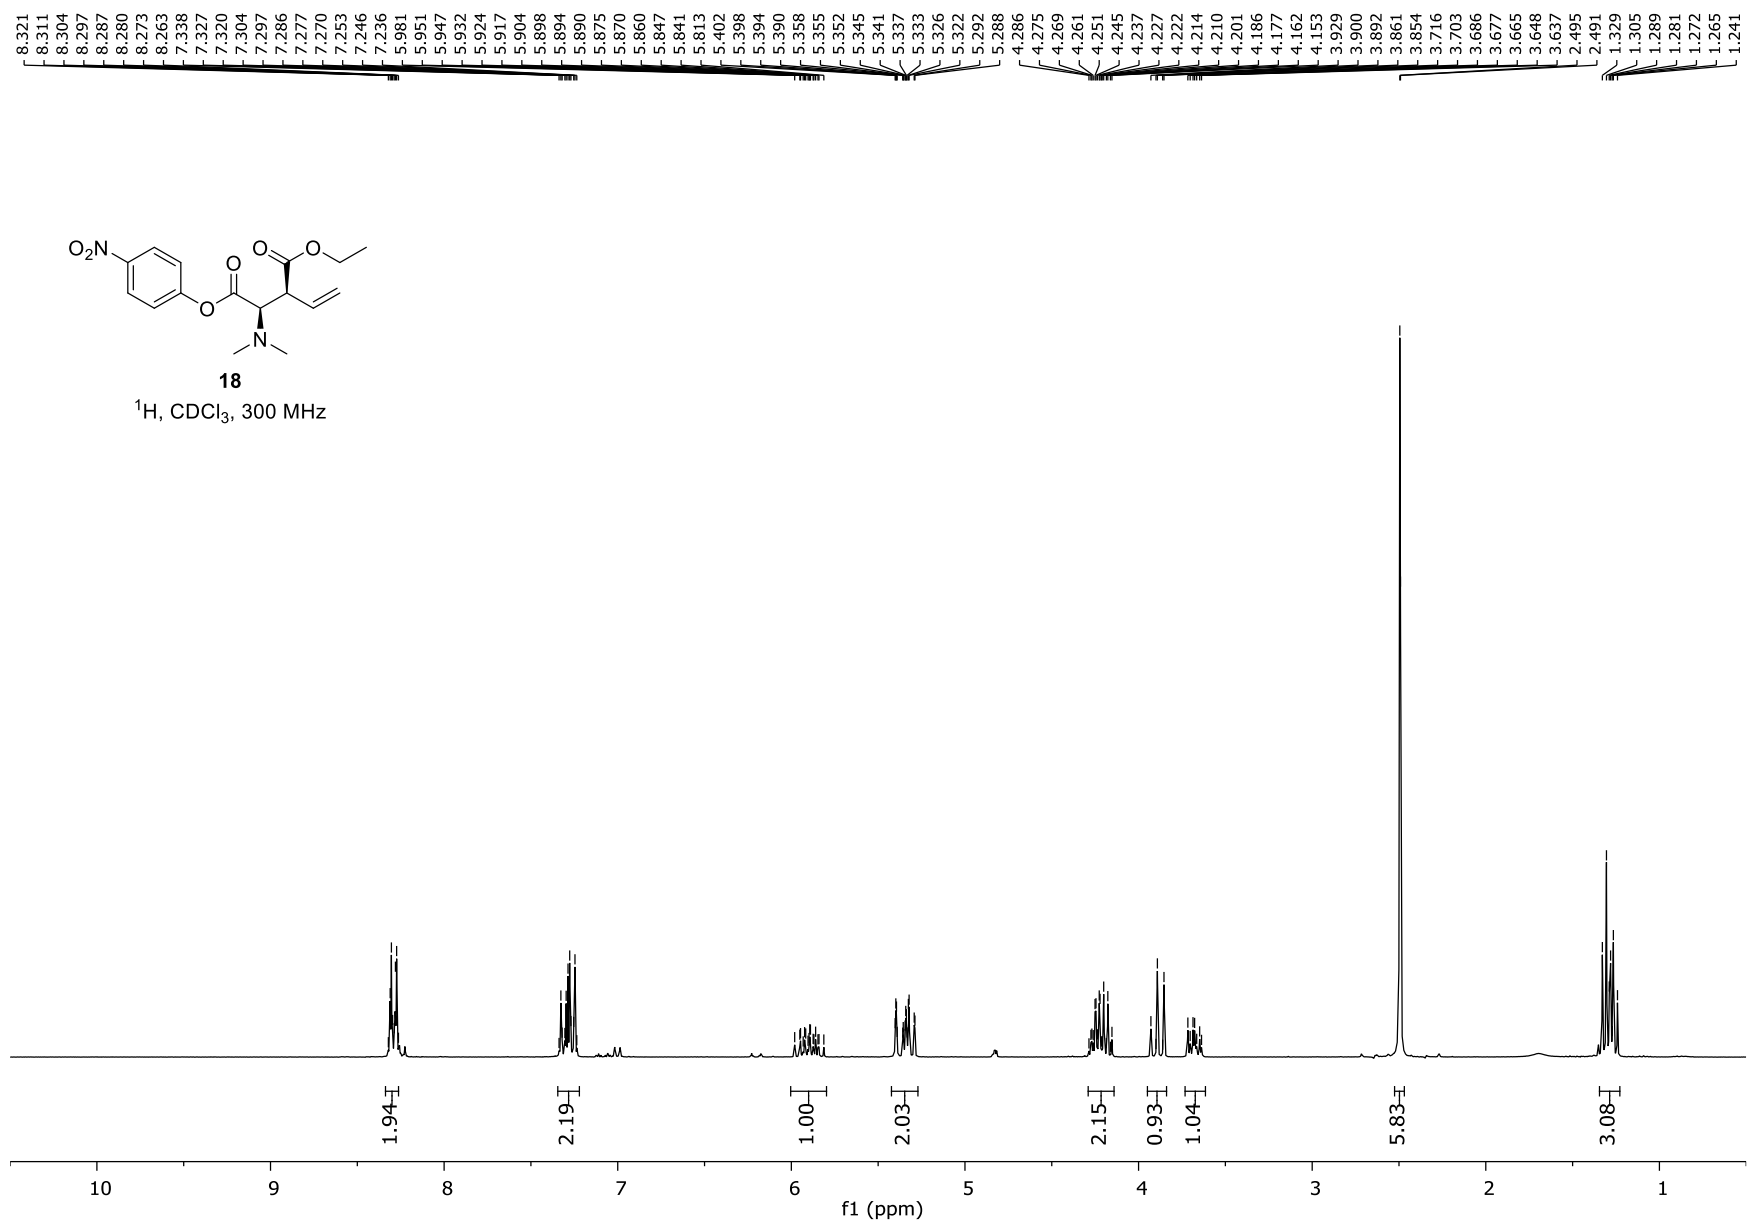

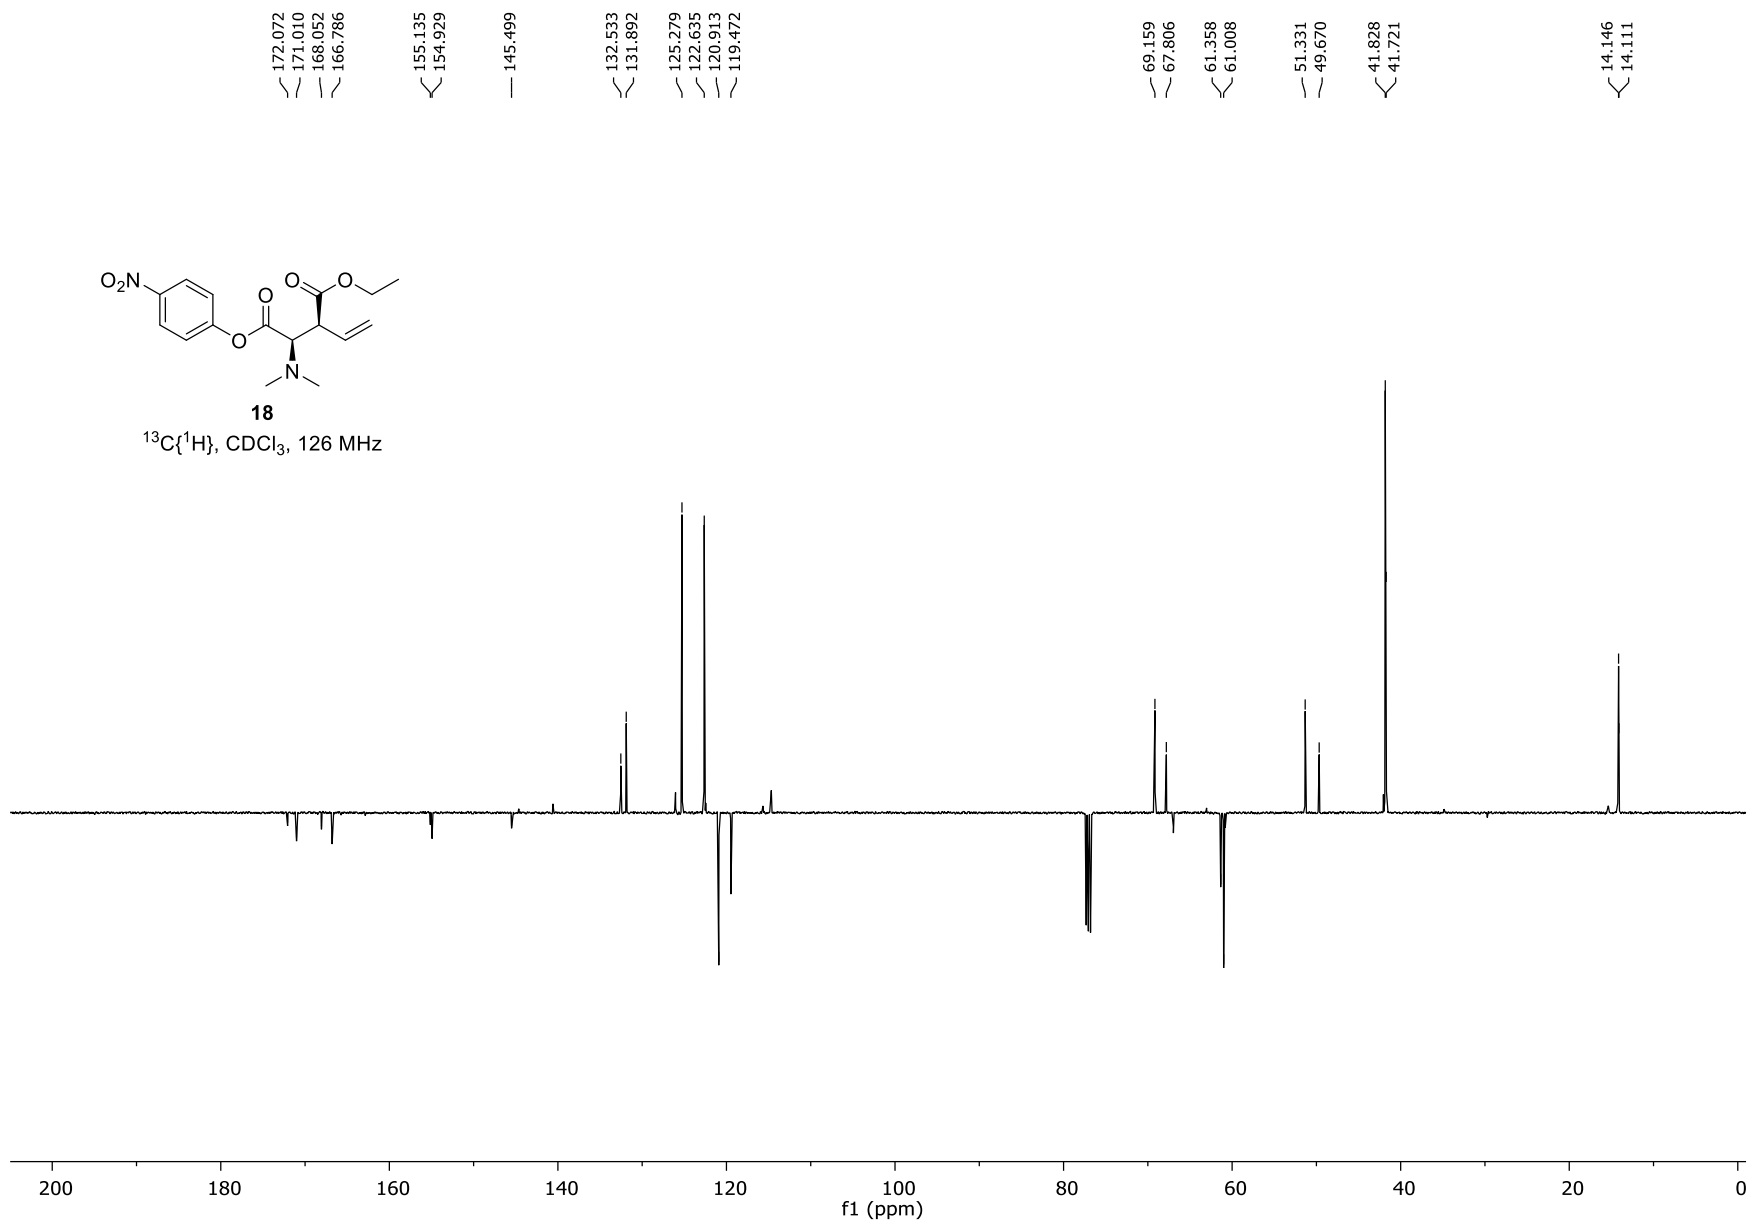

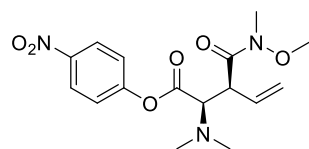

**27<sub>maj</sub>**

<sup>1</sup>H, CDCl<sub>3</sub>, 500 MHz

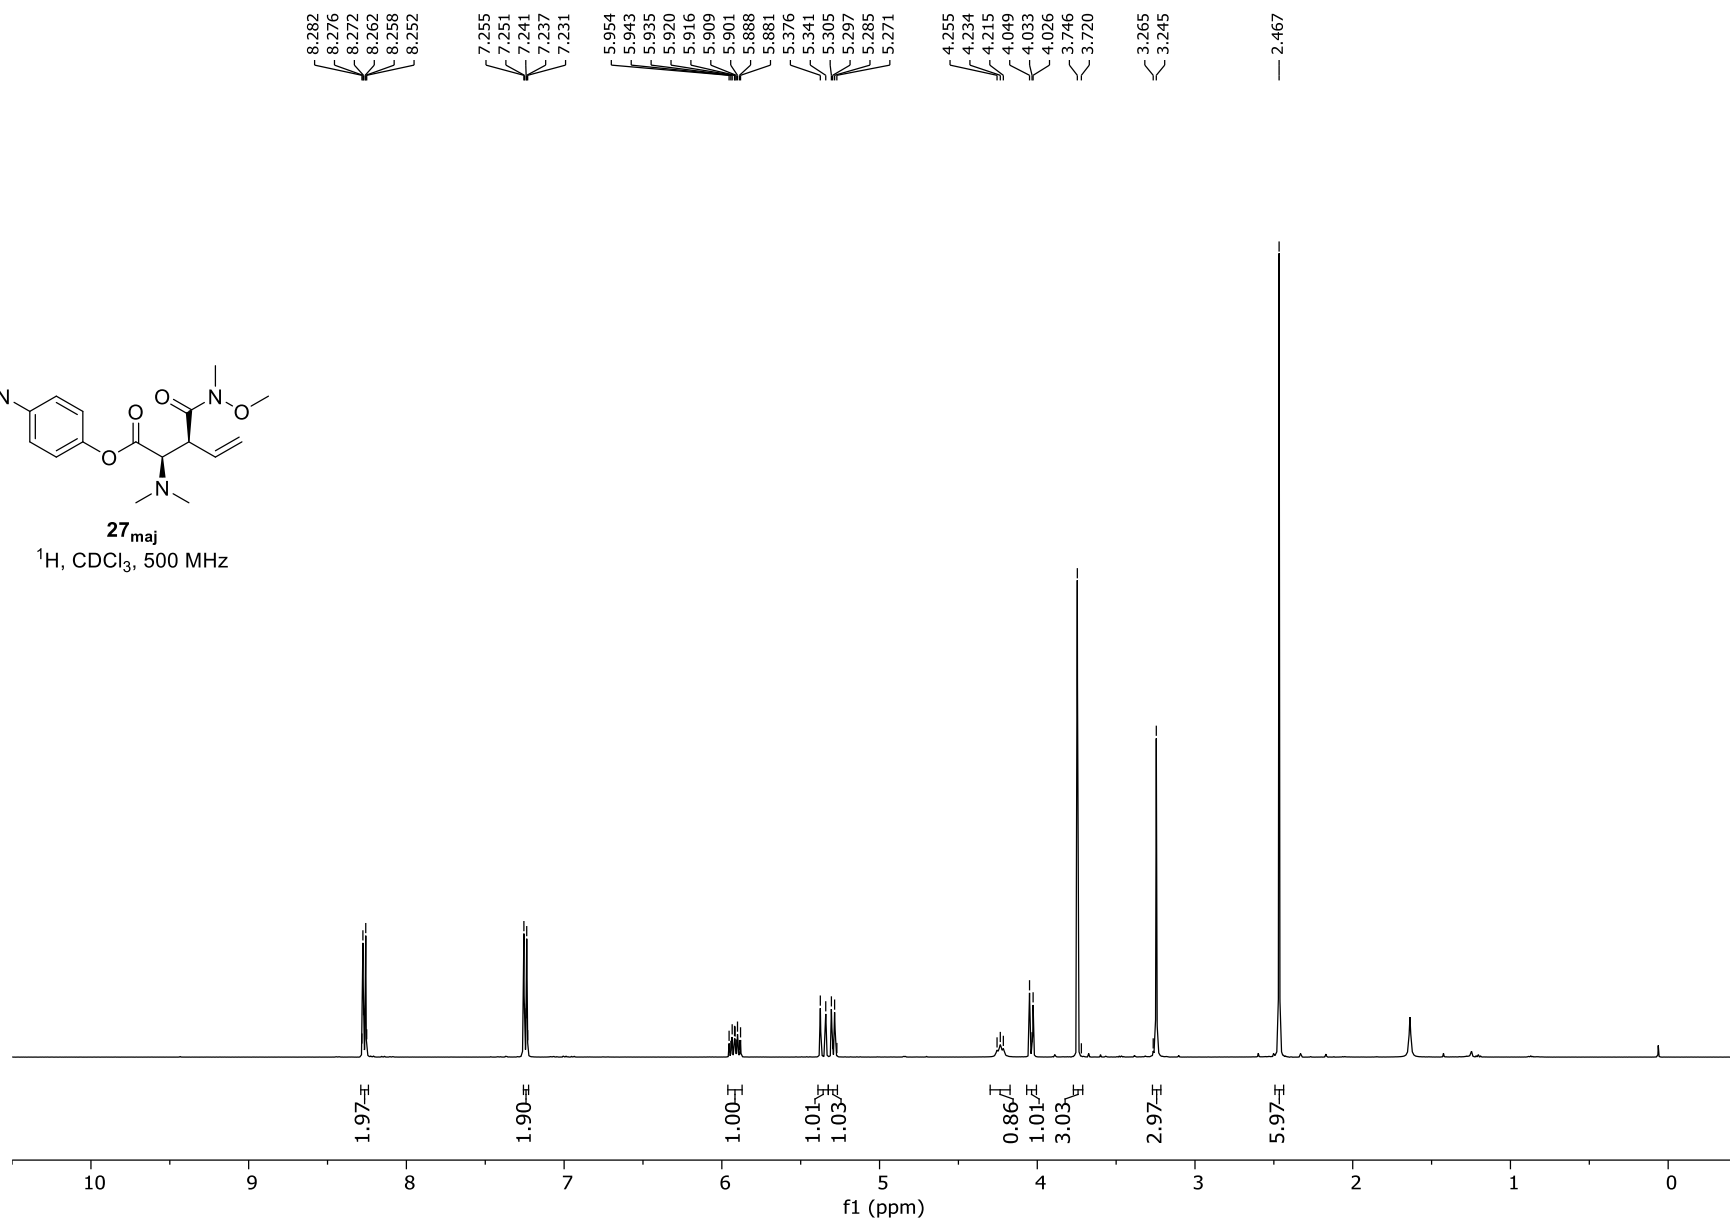

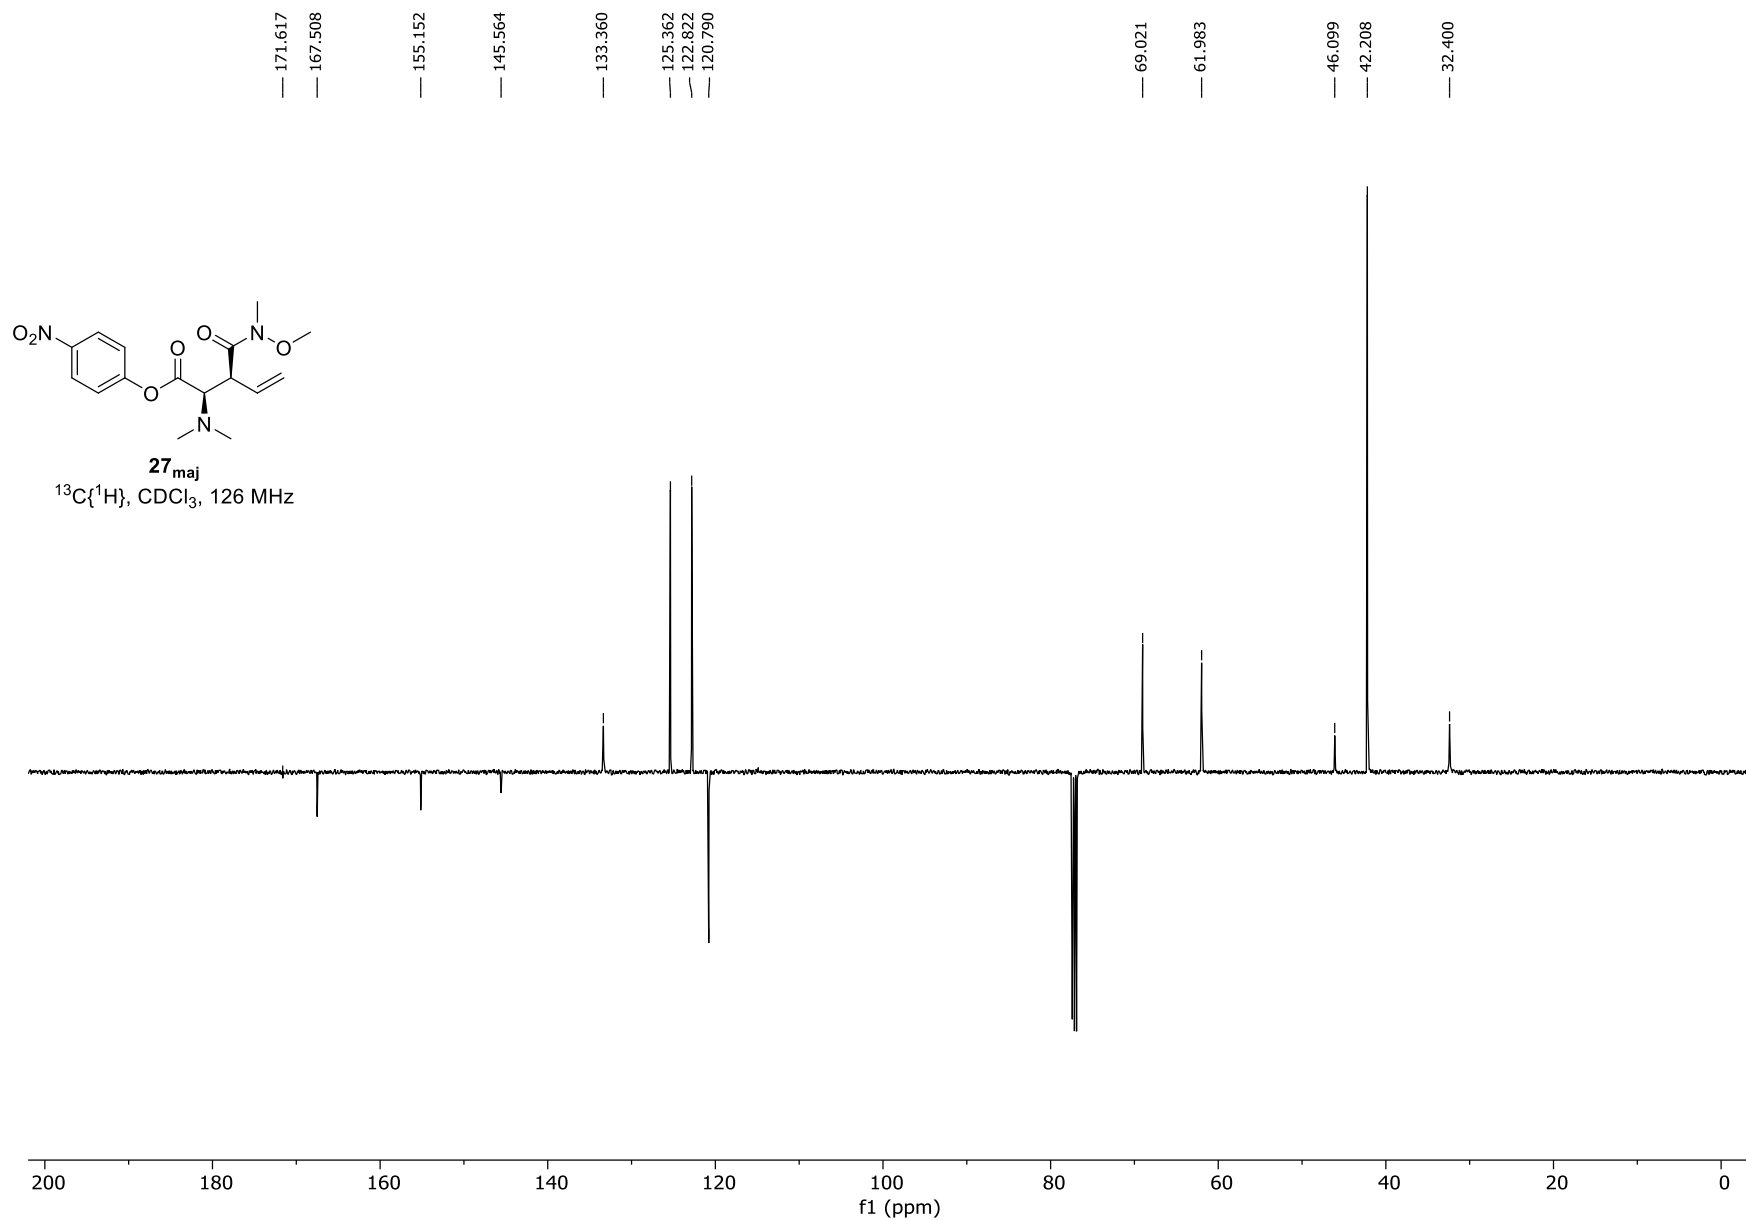

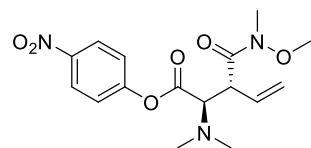

**27<sub>min</sub>**

<sup>1</sup>H, CDCl<sub>3</sub>, 500 MHz

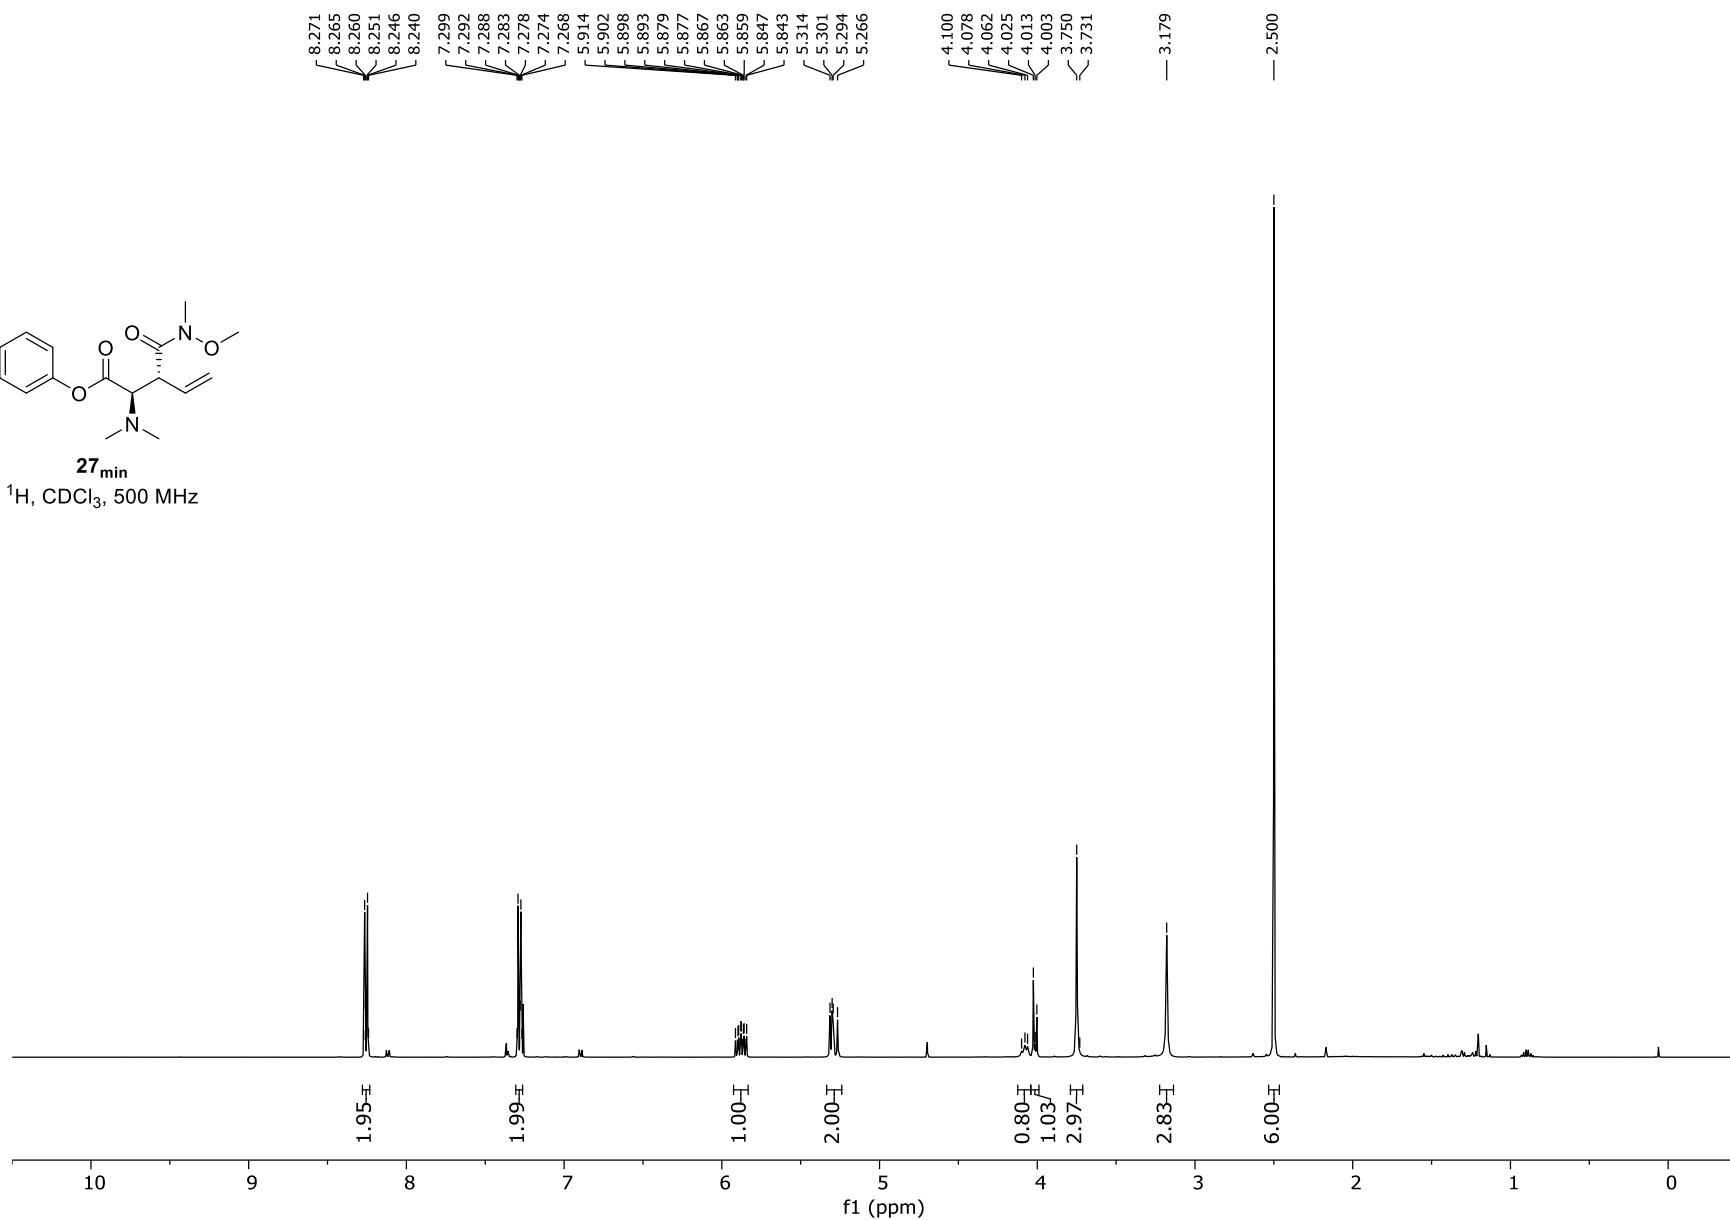

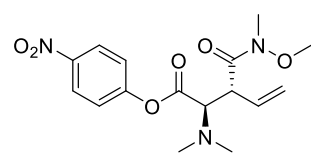

**27<sub>min</sub>**  
<sup>13</sup>C{<sup>1</sup>H}, CDCl<sub>3</sub>, 126 MHz

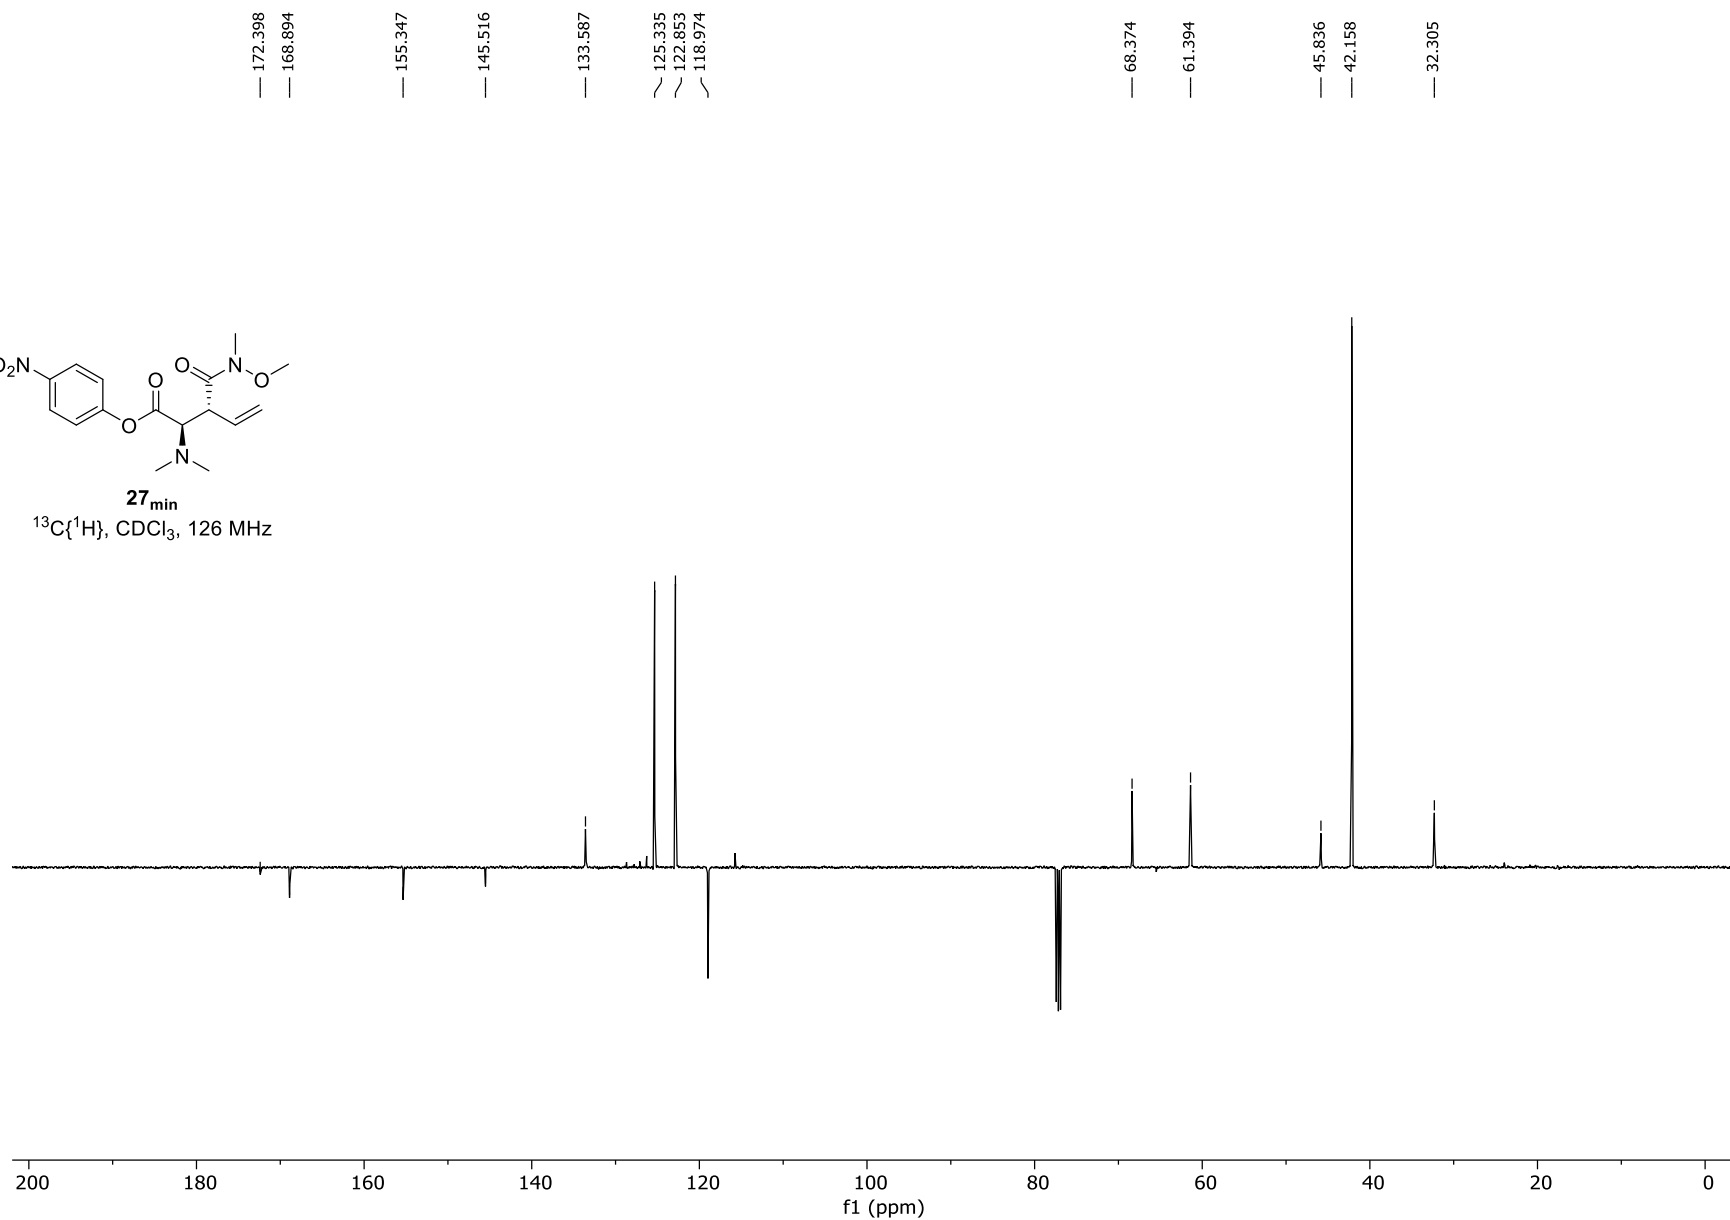

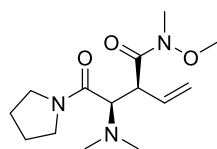

**28<sub>maj</sub>**

<sup>1</sup>H, CDCl<sub>3</sub>, 500 MHz

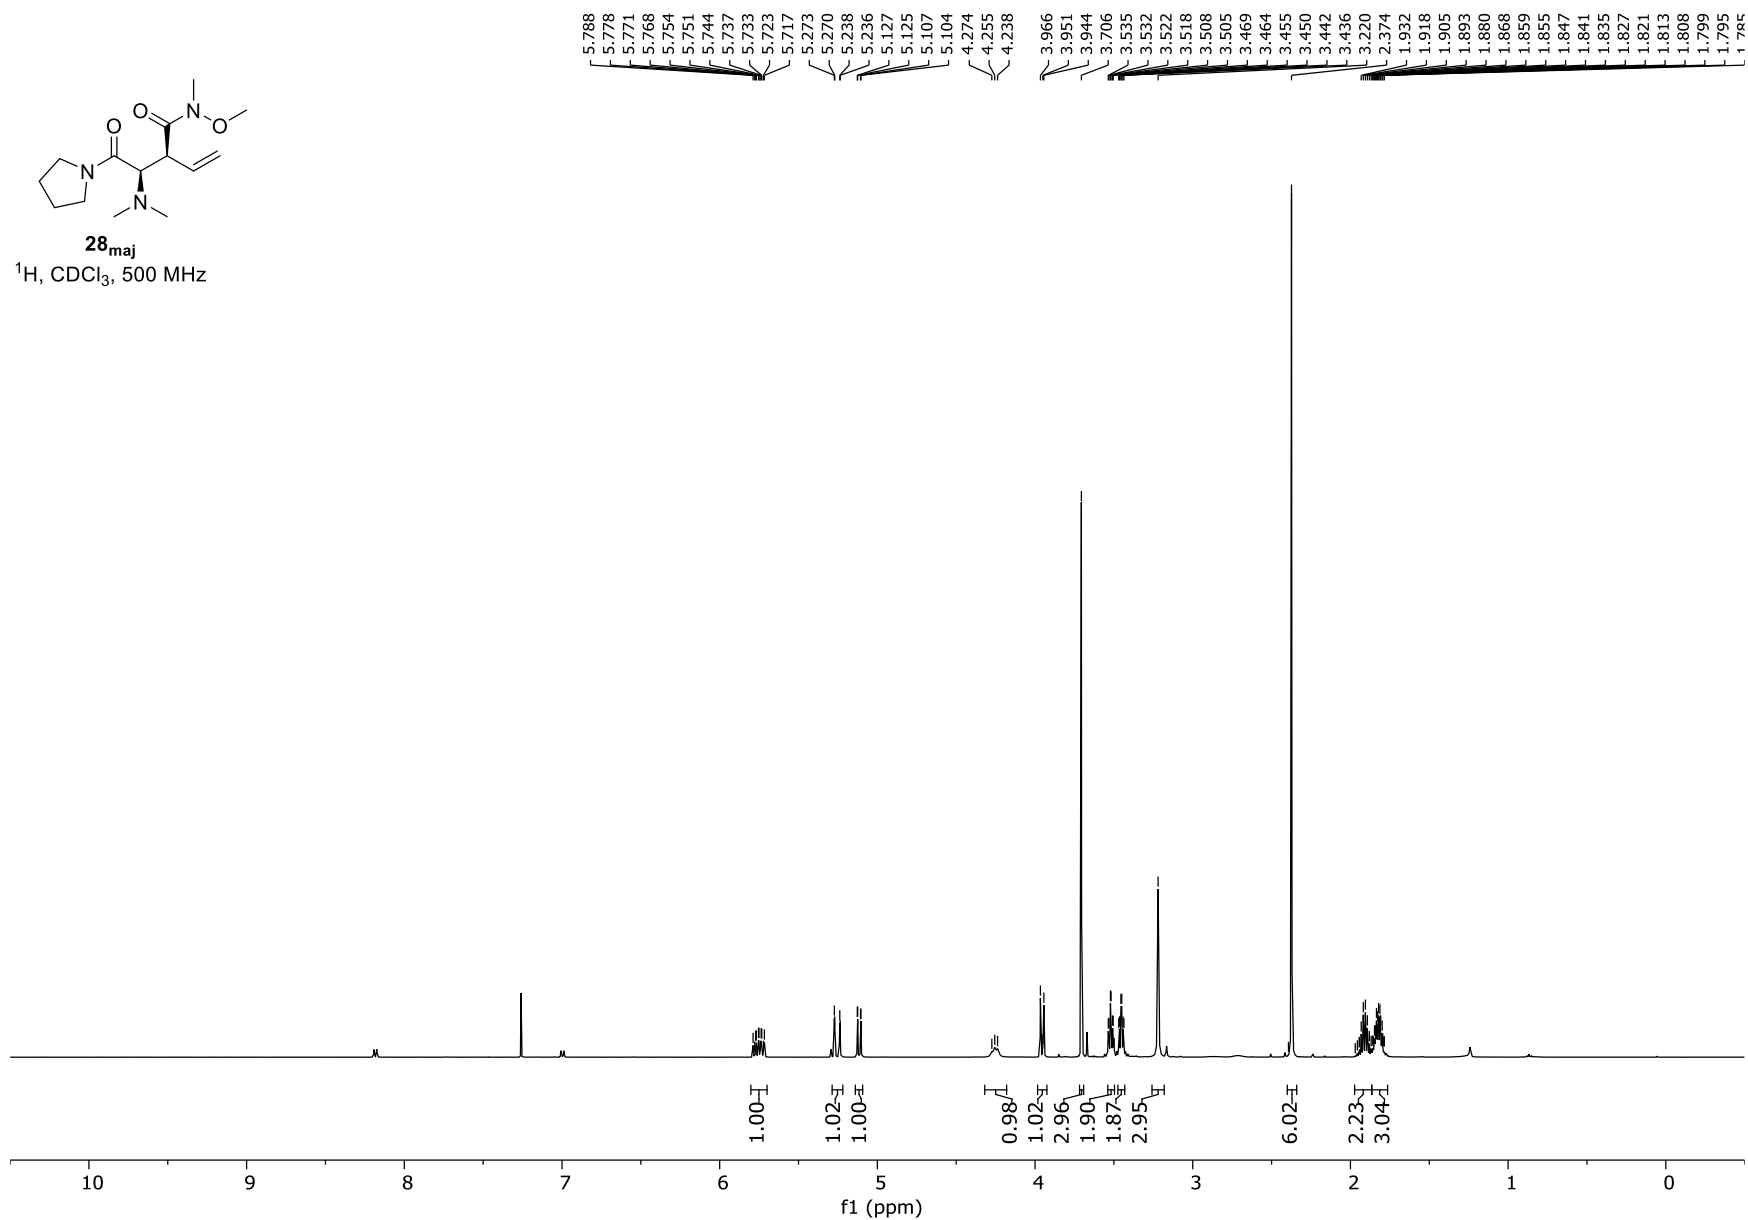



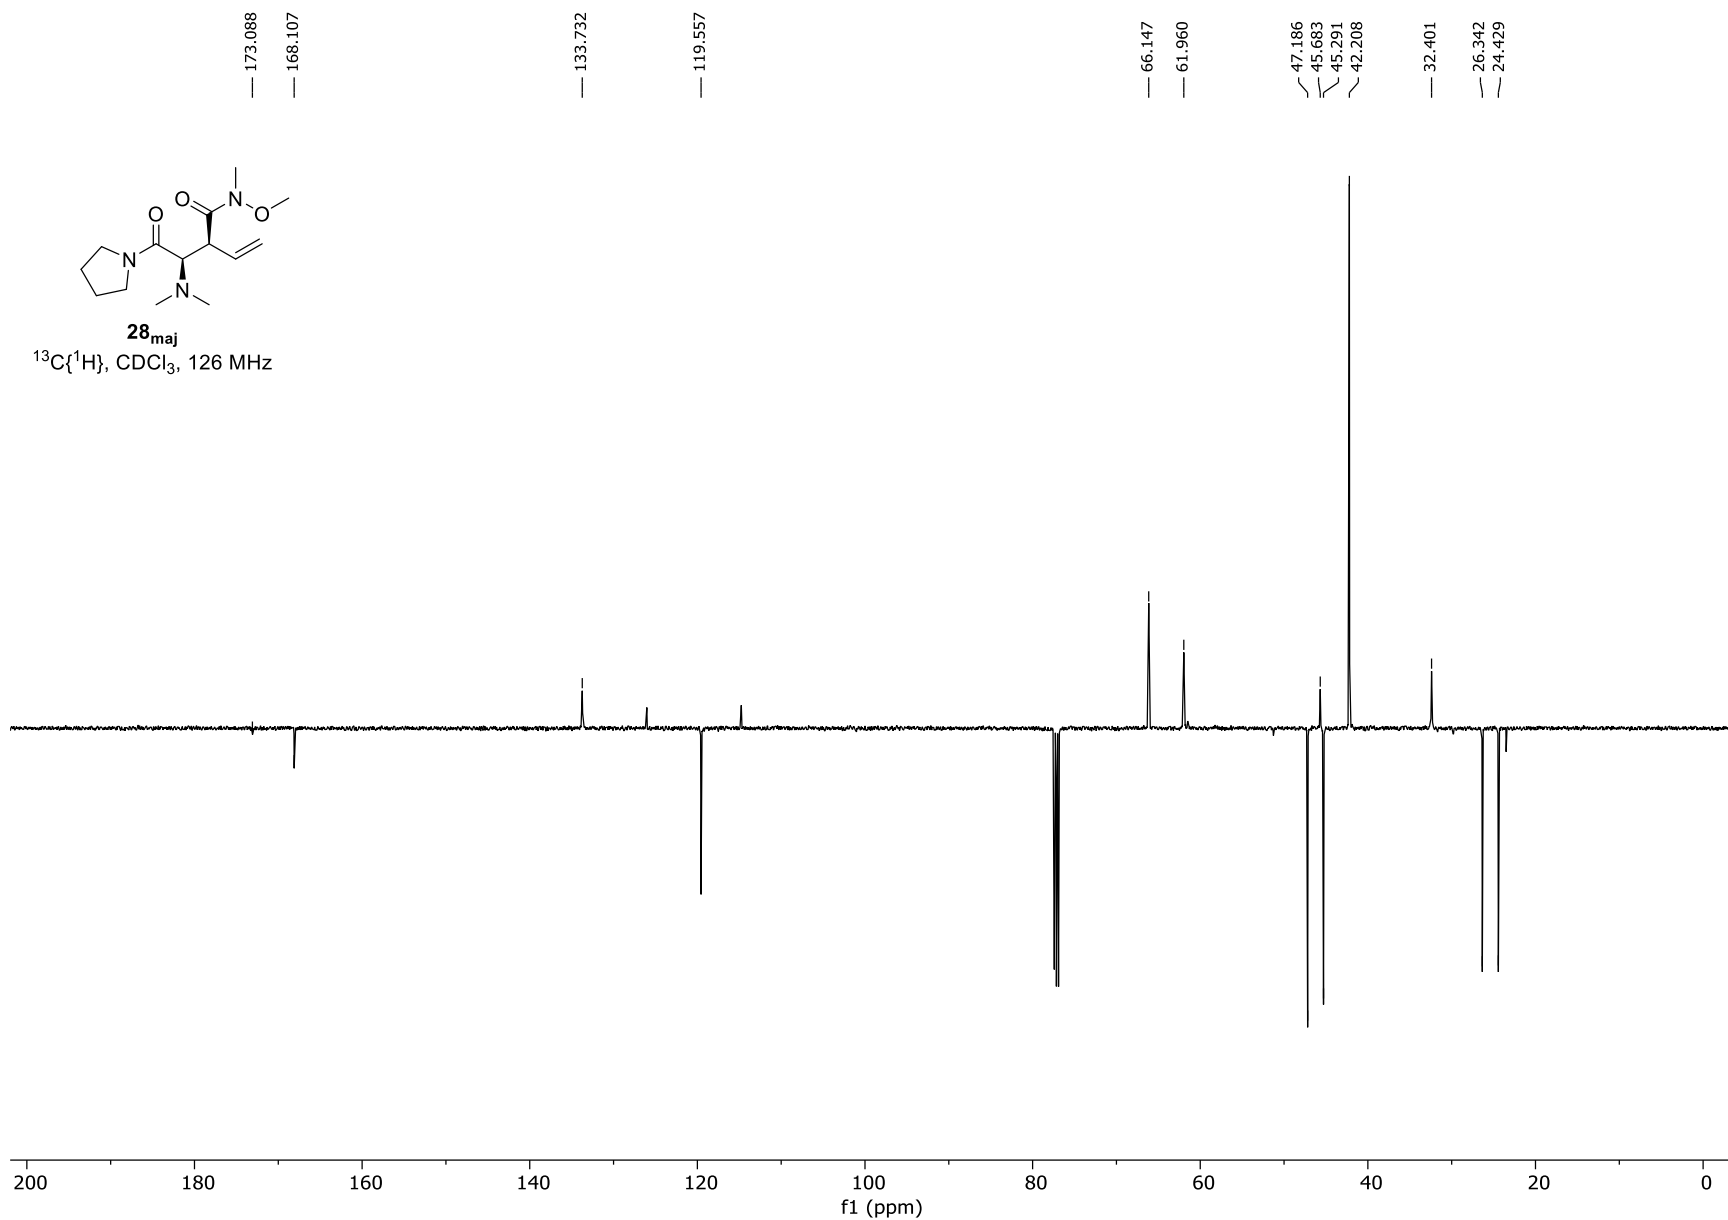

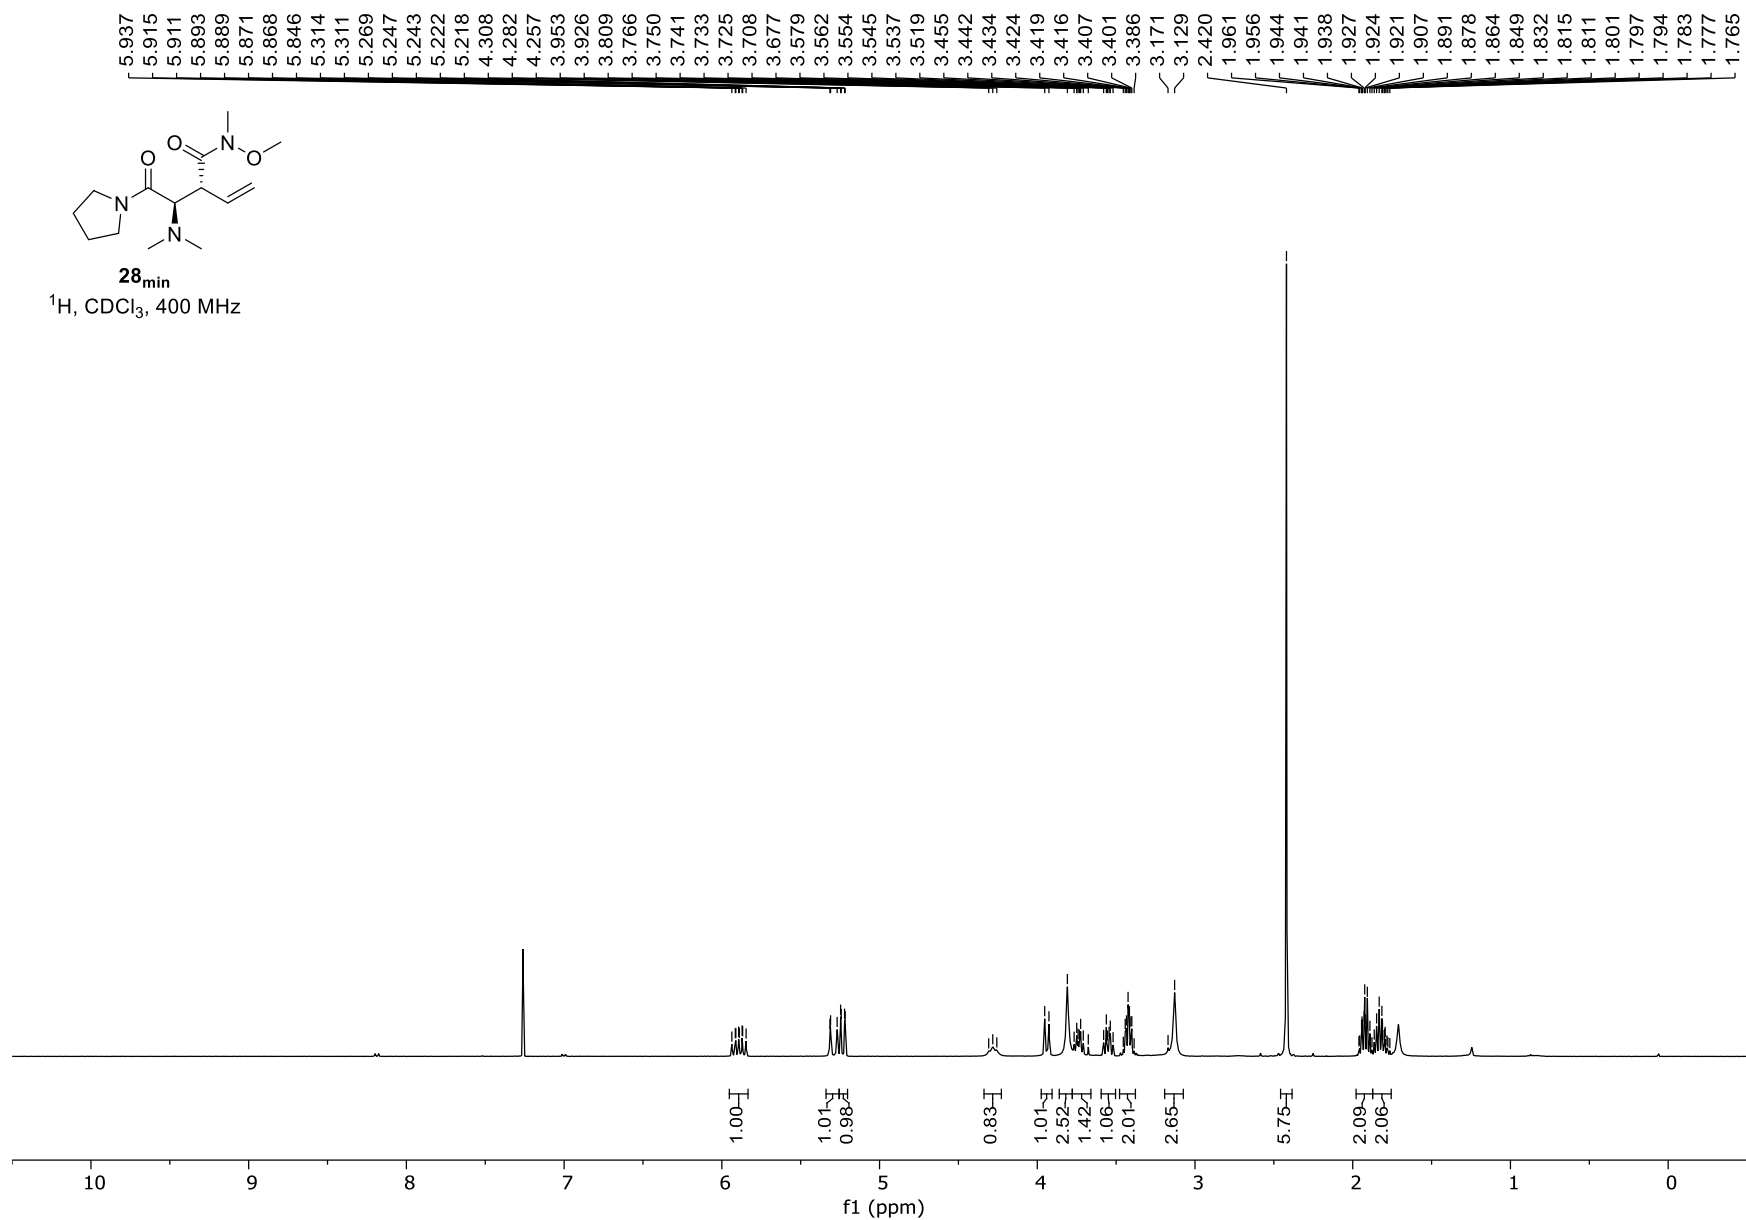

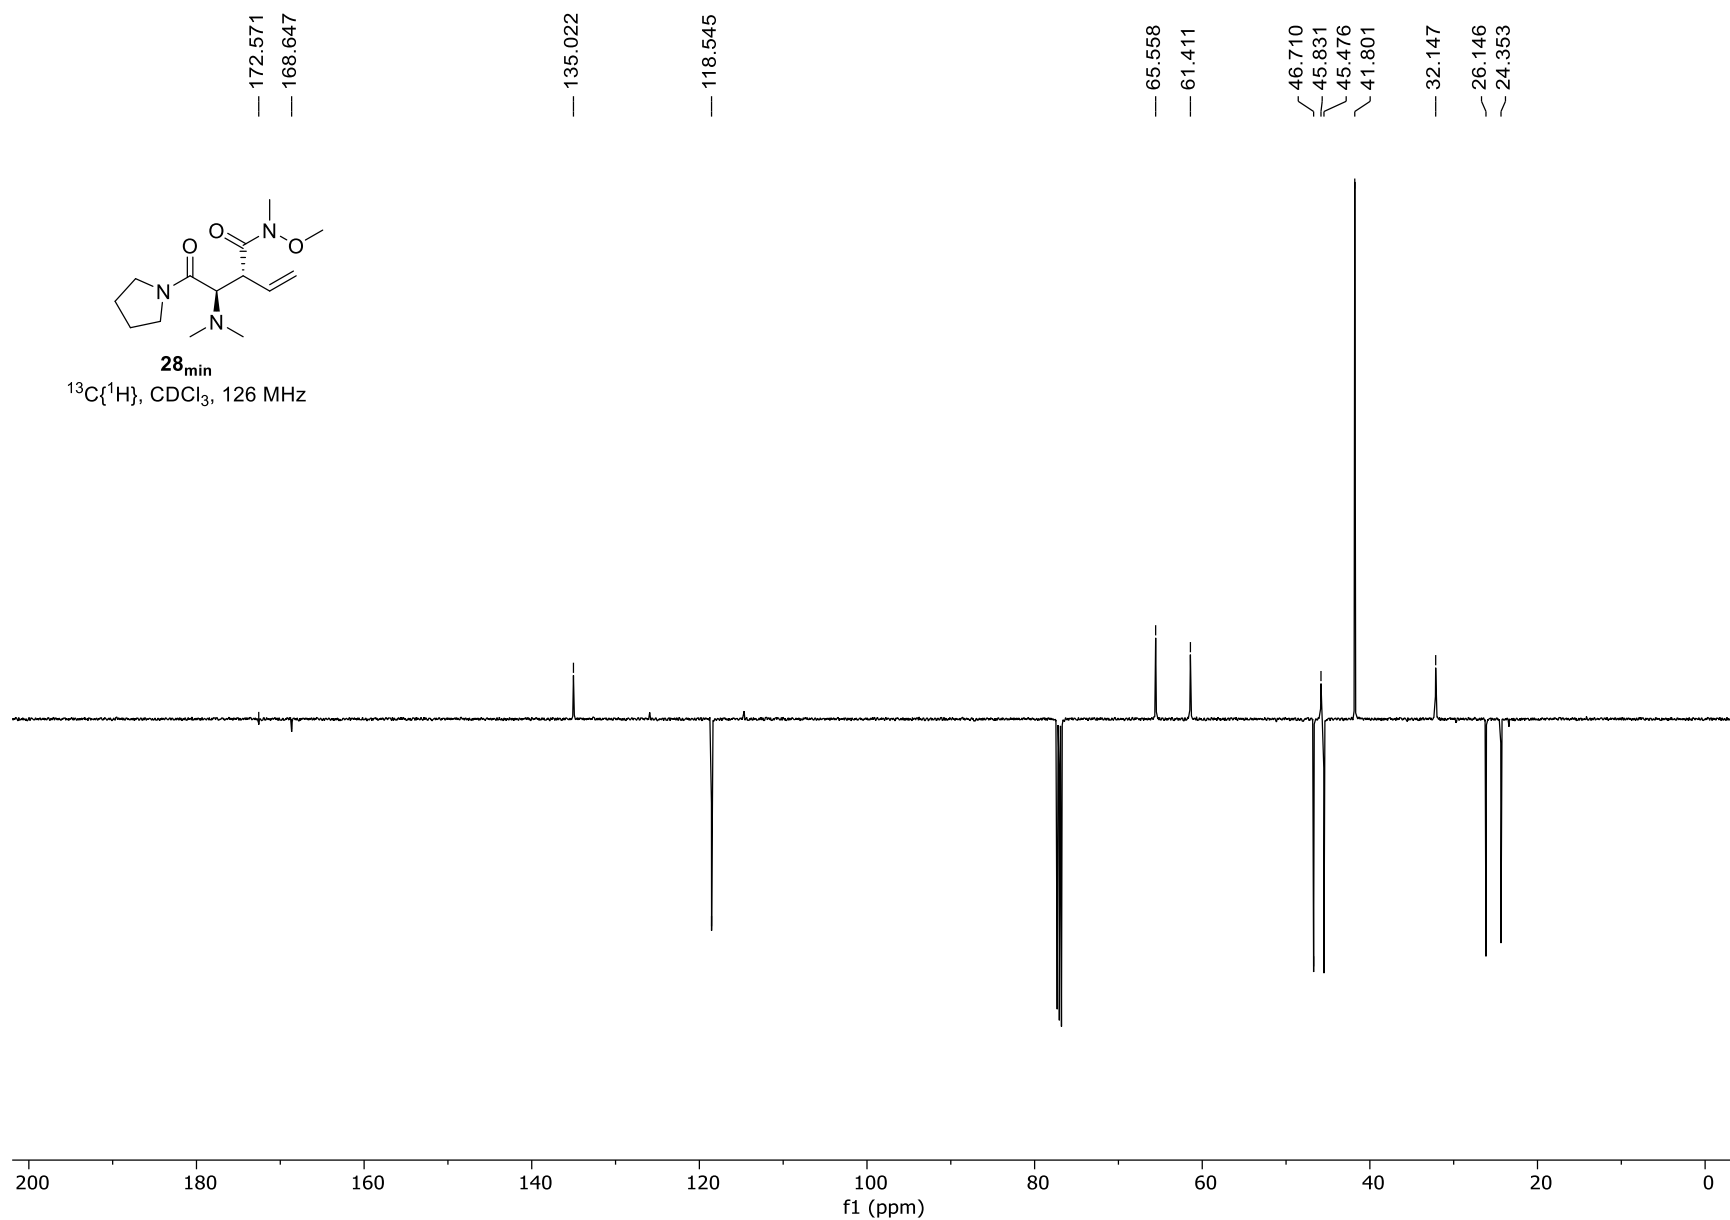

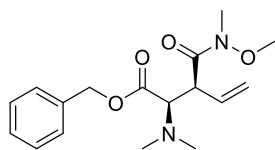

**29<sub>maj</sub>**

<sup>1</sup>H, CDCl<sub>3</sub>, 500 MHz

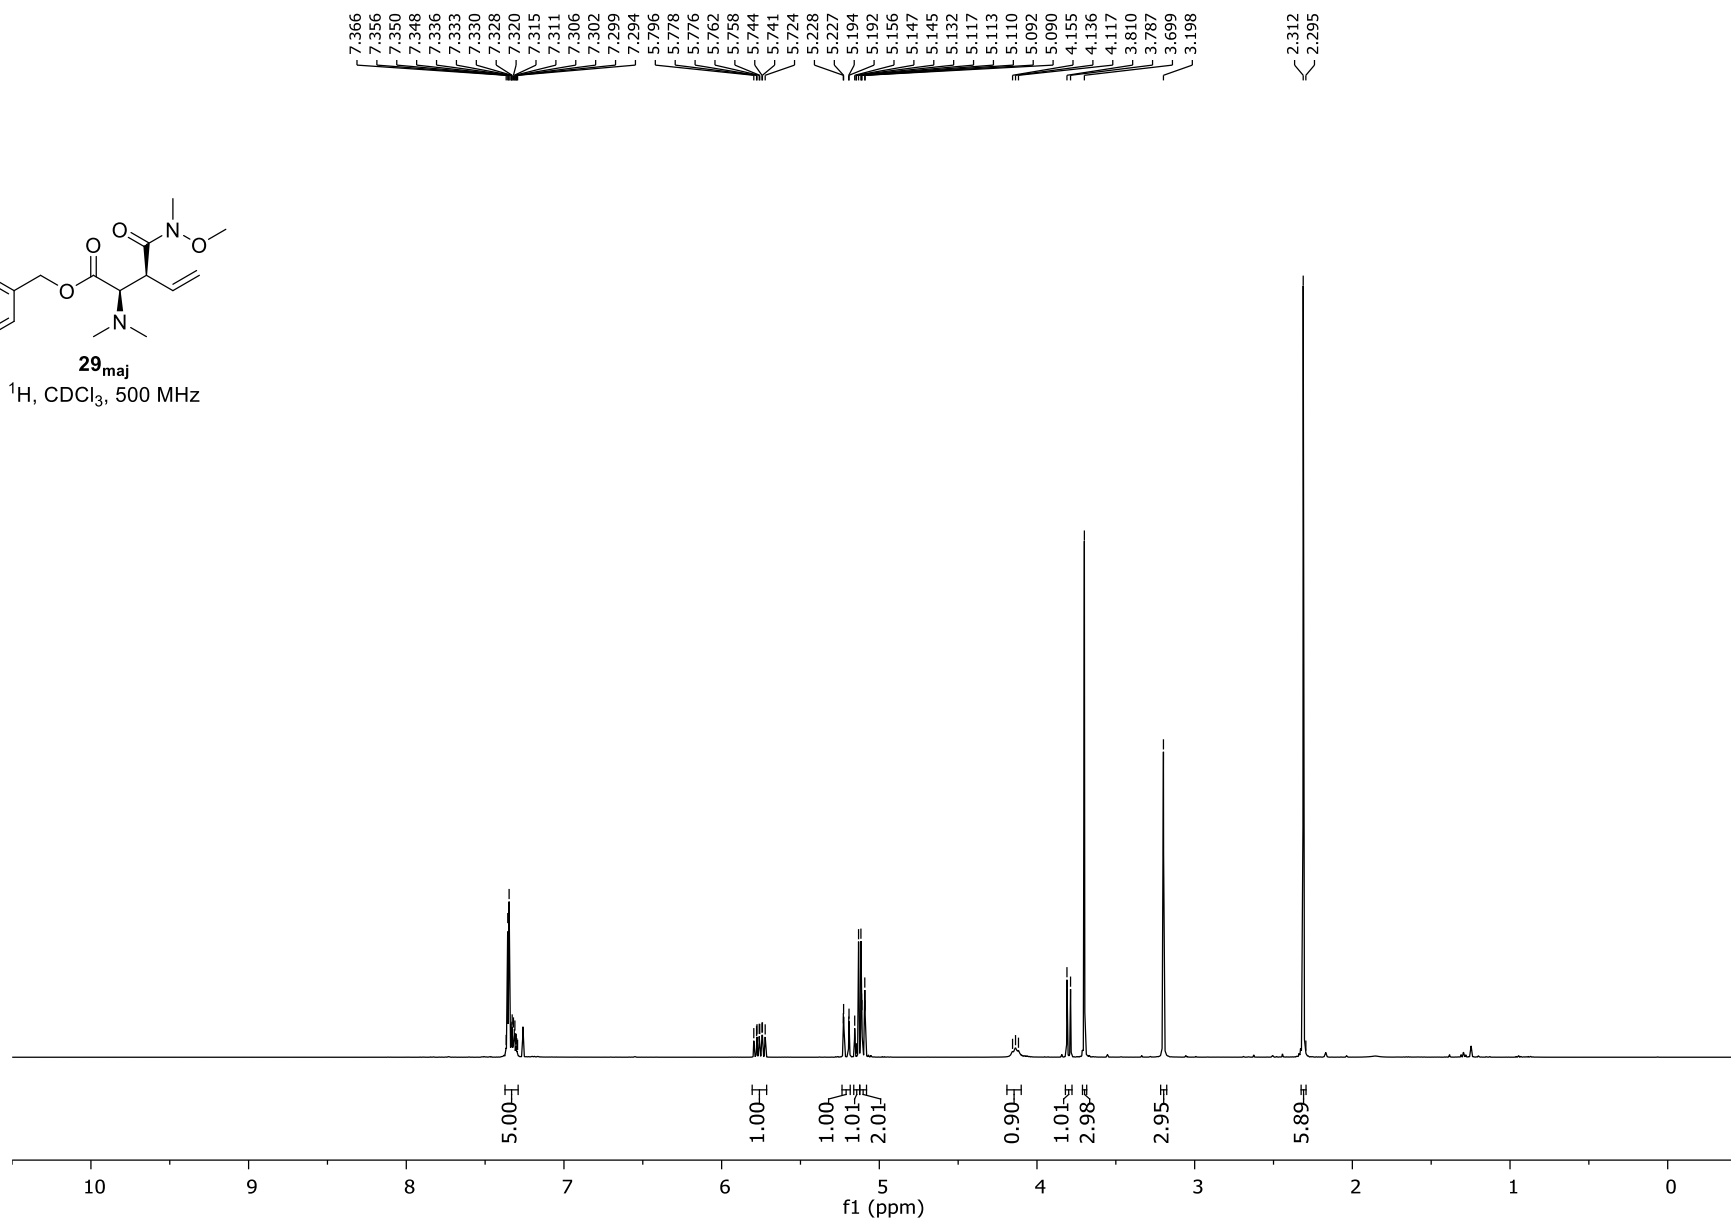

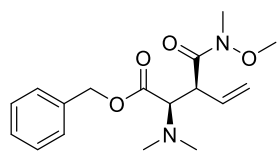

**29<sub>maj</sub>**

$^{13}\text{C}\{^1\text{H}\}$ ,  $\text{CDCl}_3$ , 126 MHz

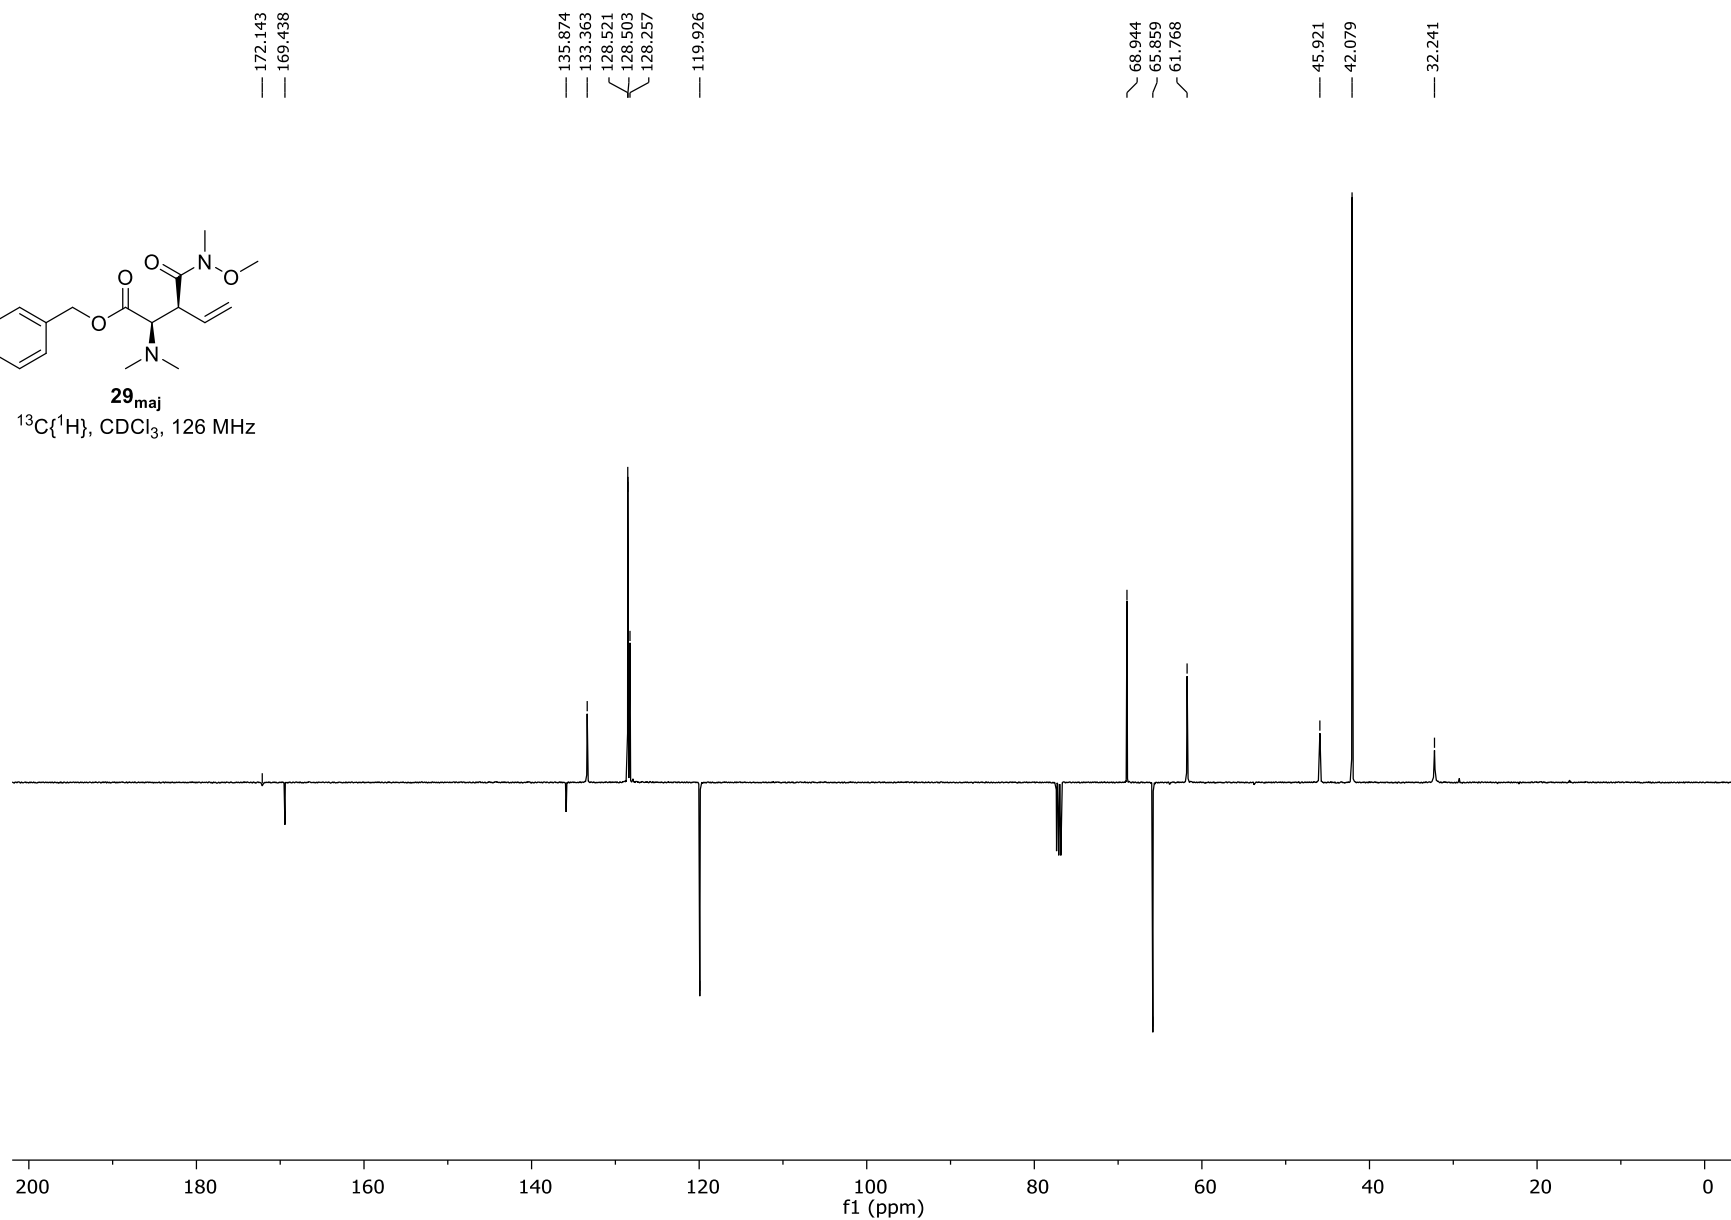

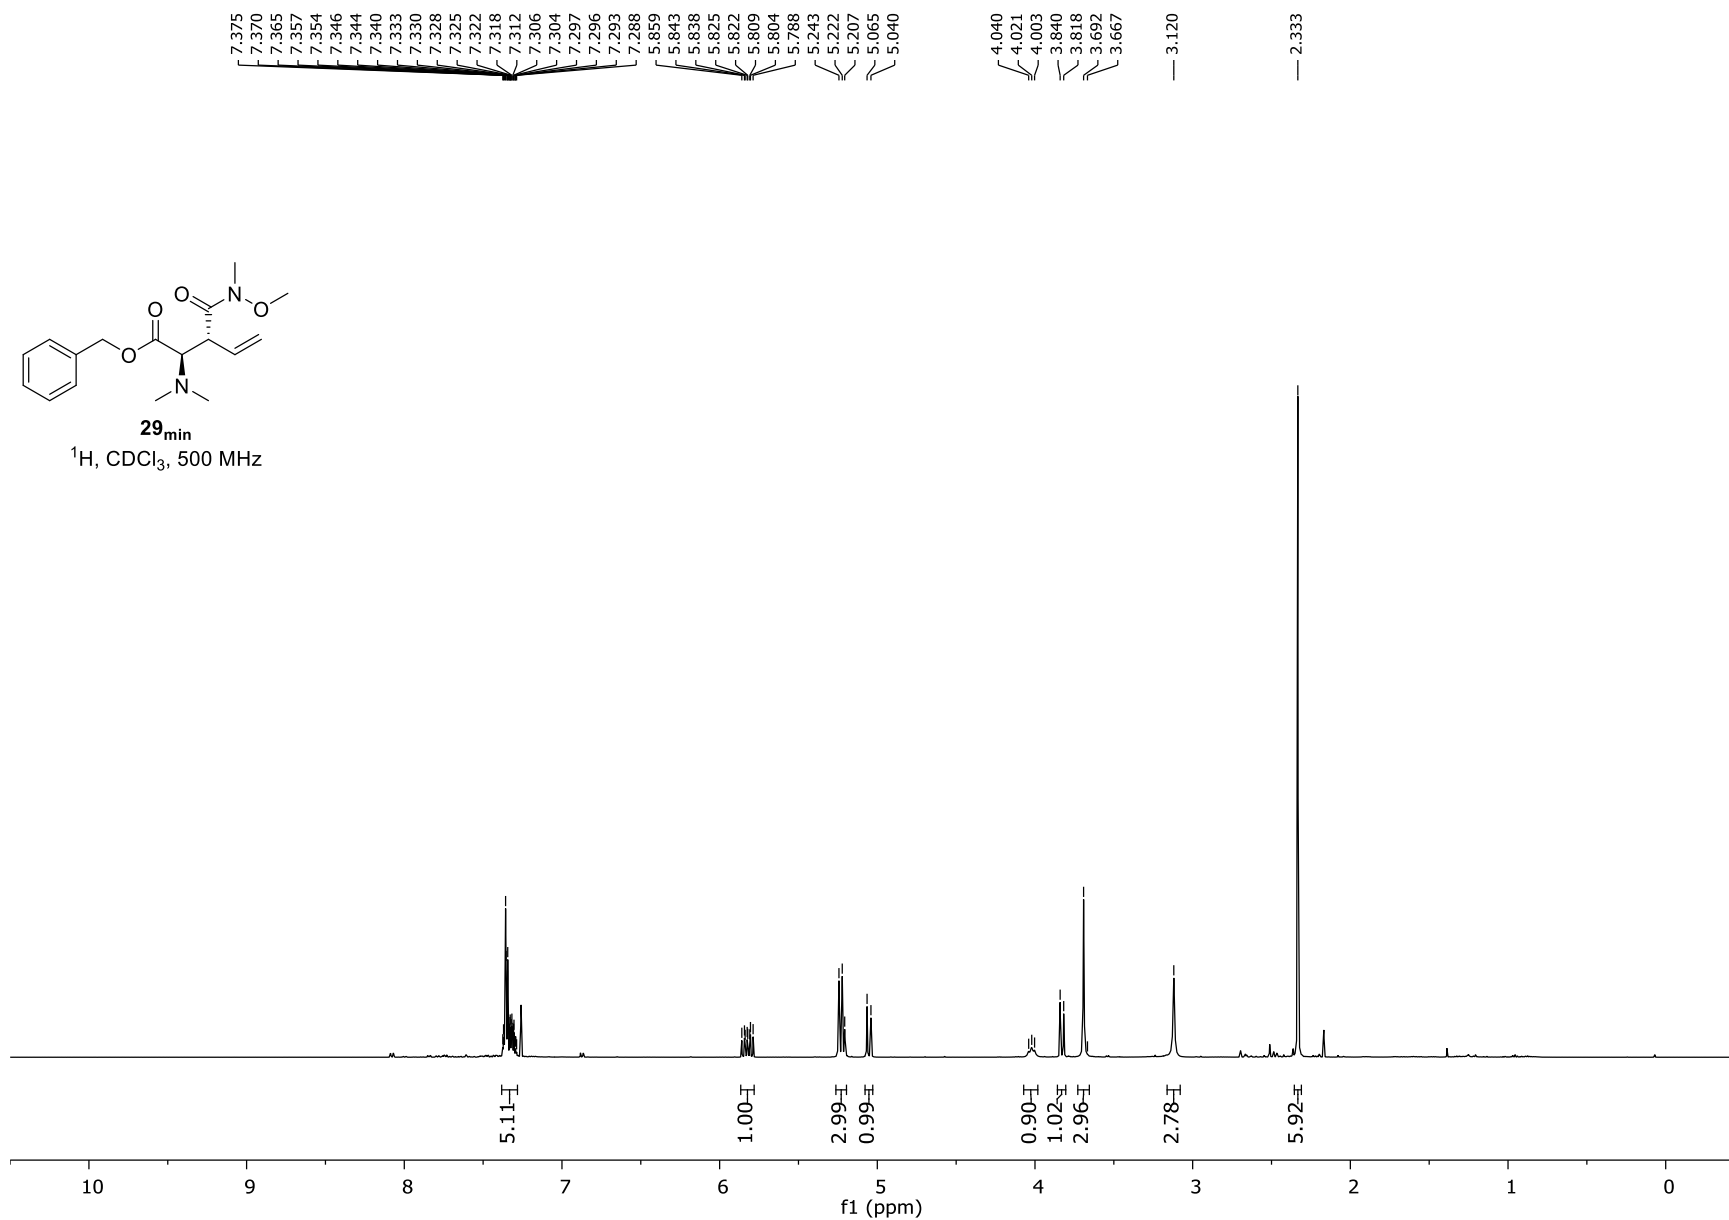

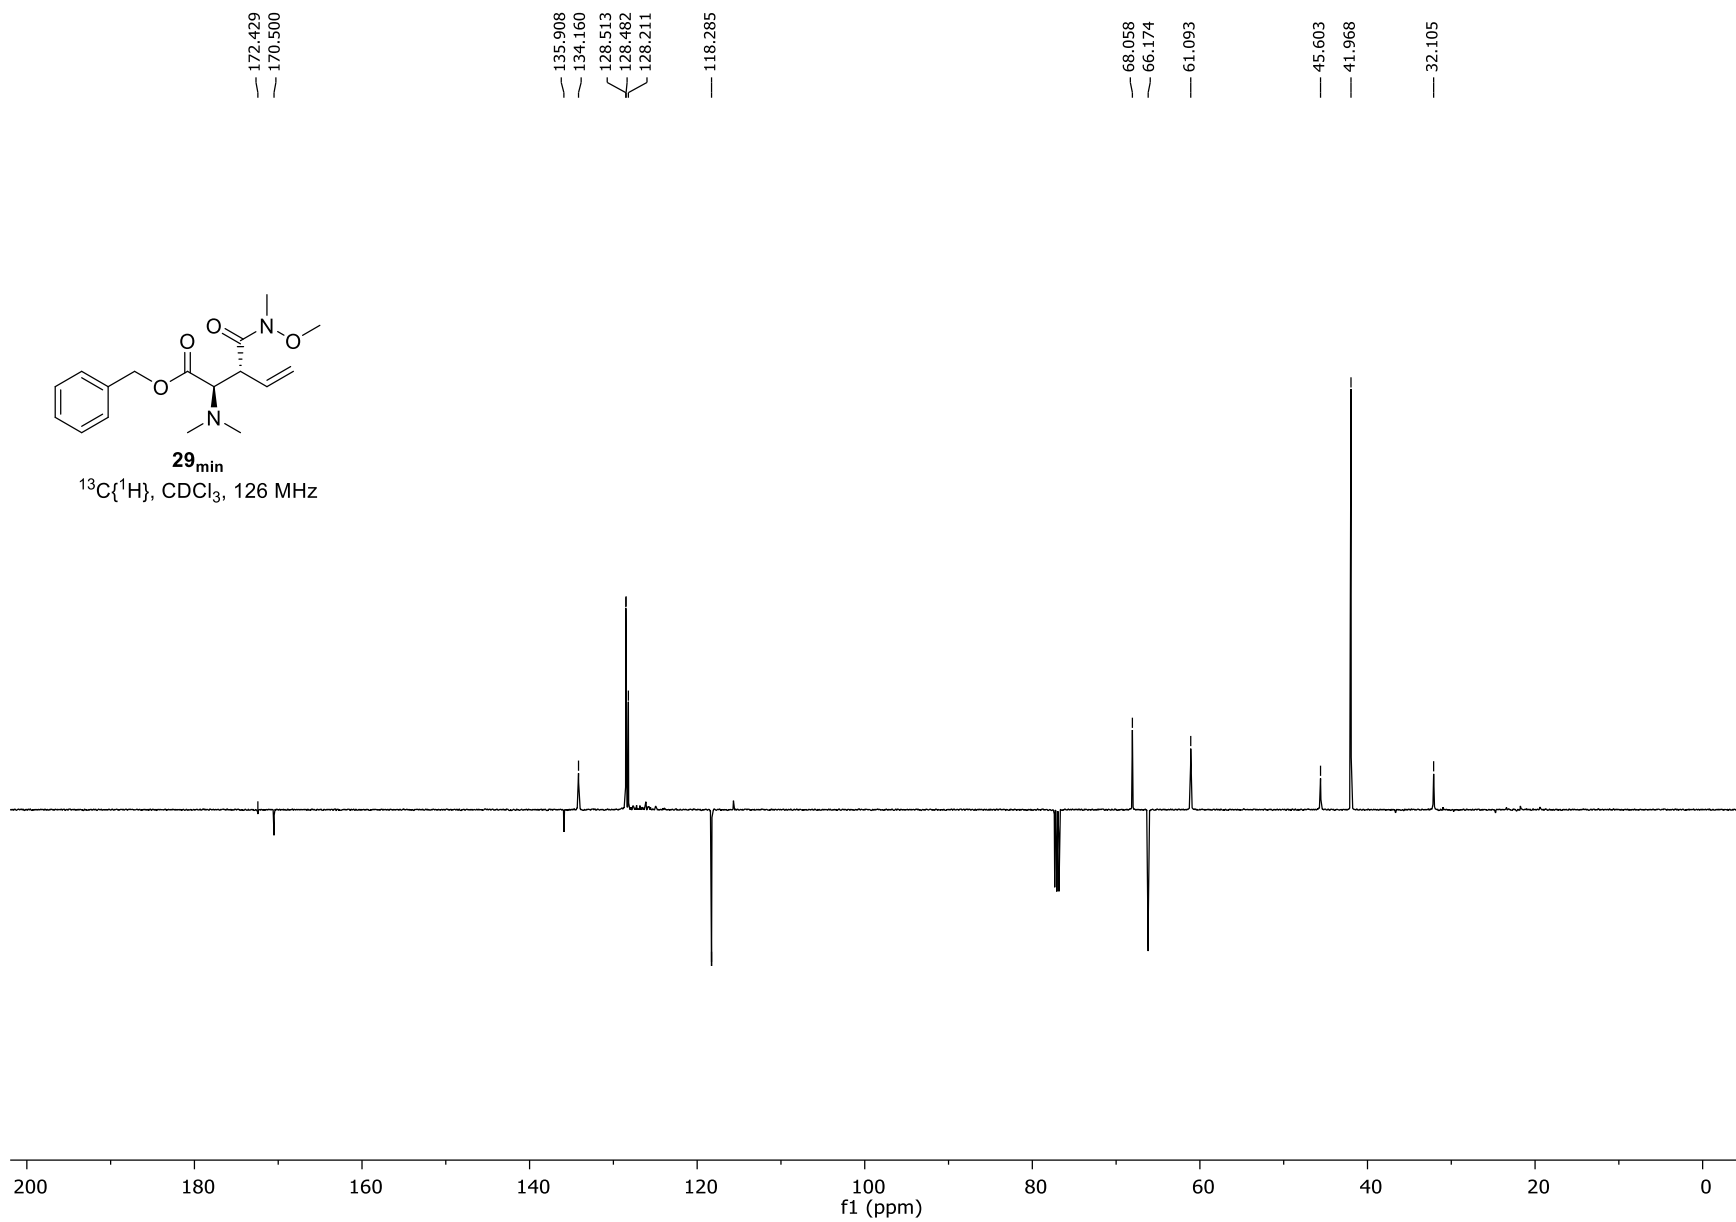

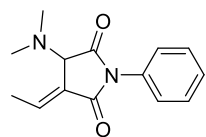

**(E)-37**

$^1\text{H}$ ,  $\text{CDCl}_3$ , 500 MHz

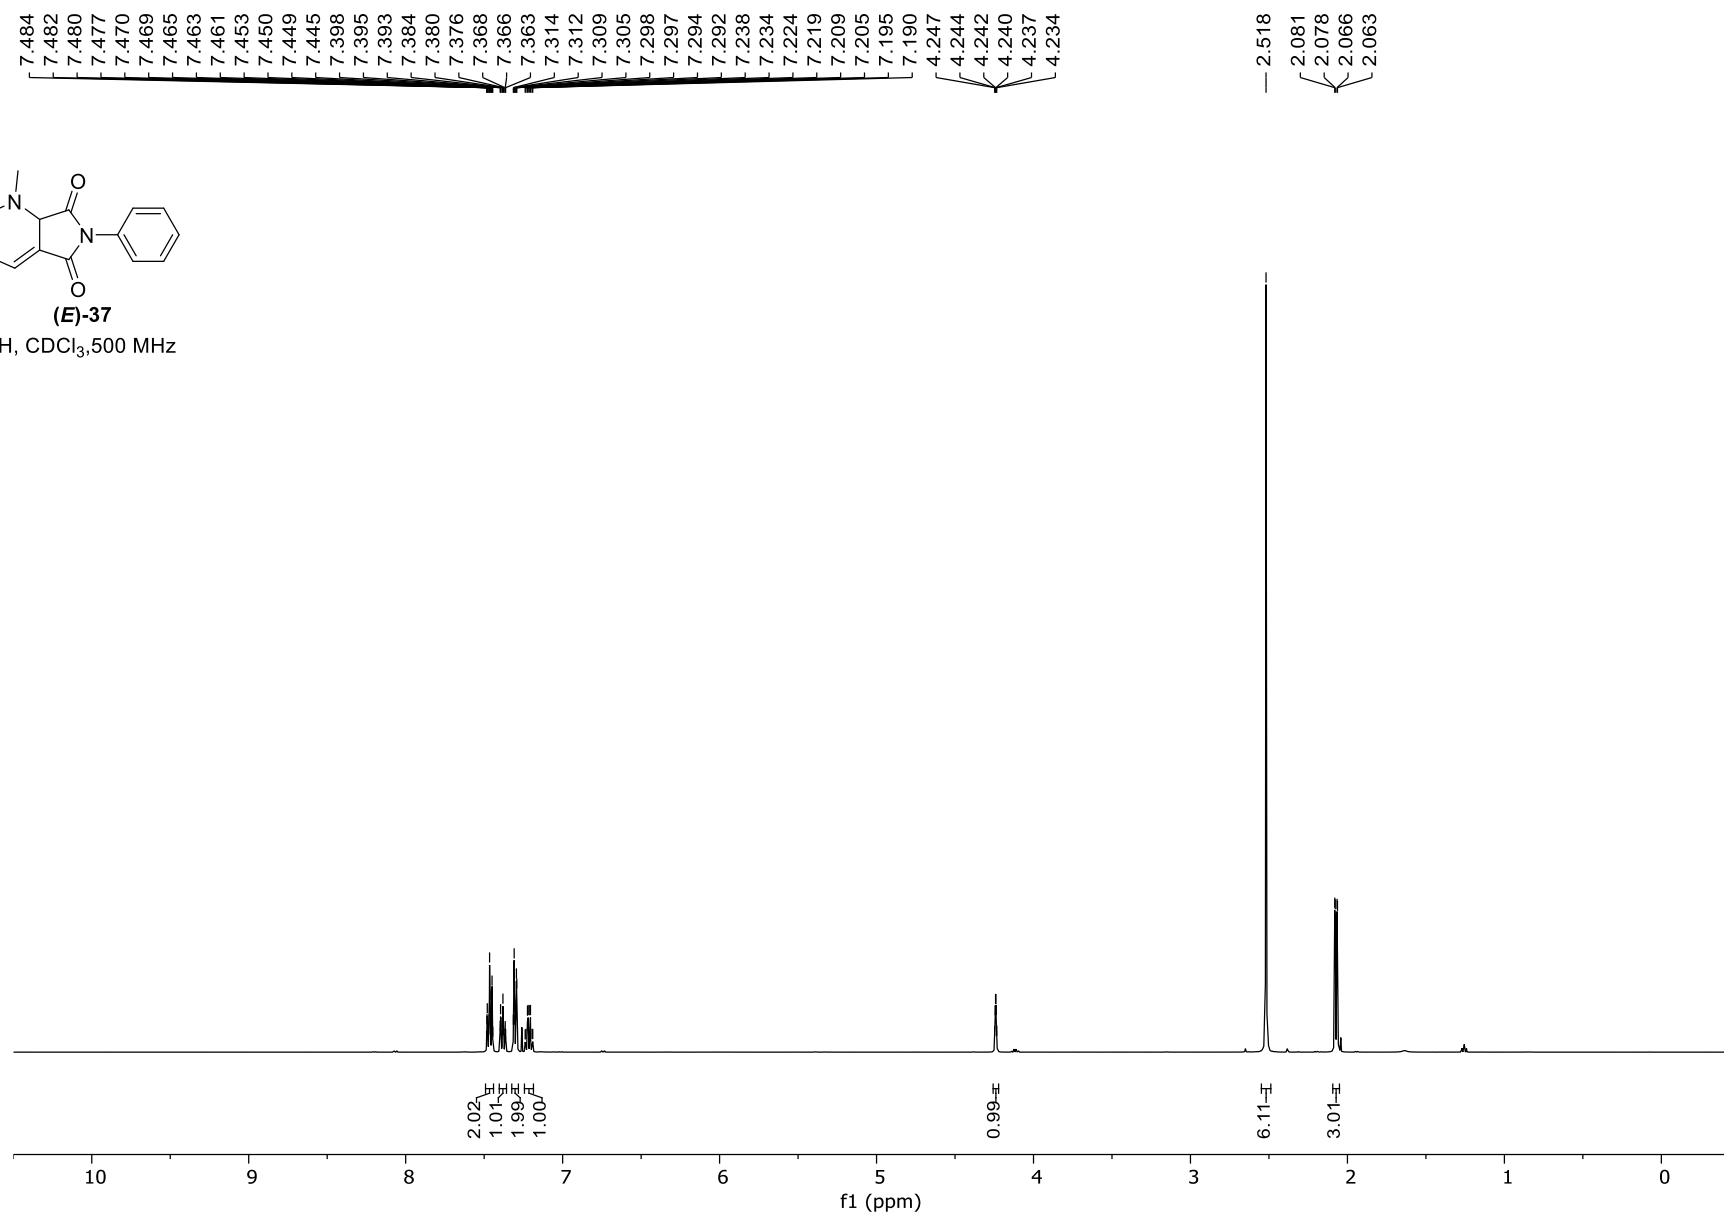



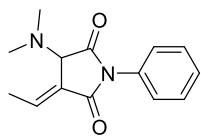

**(E)-37**

$^{13}\text{C}\{^1\text{H}\}$ ,  $\text{CDCl}_3$ , 126 MHz

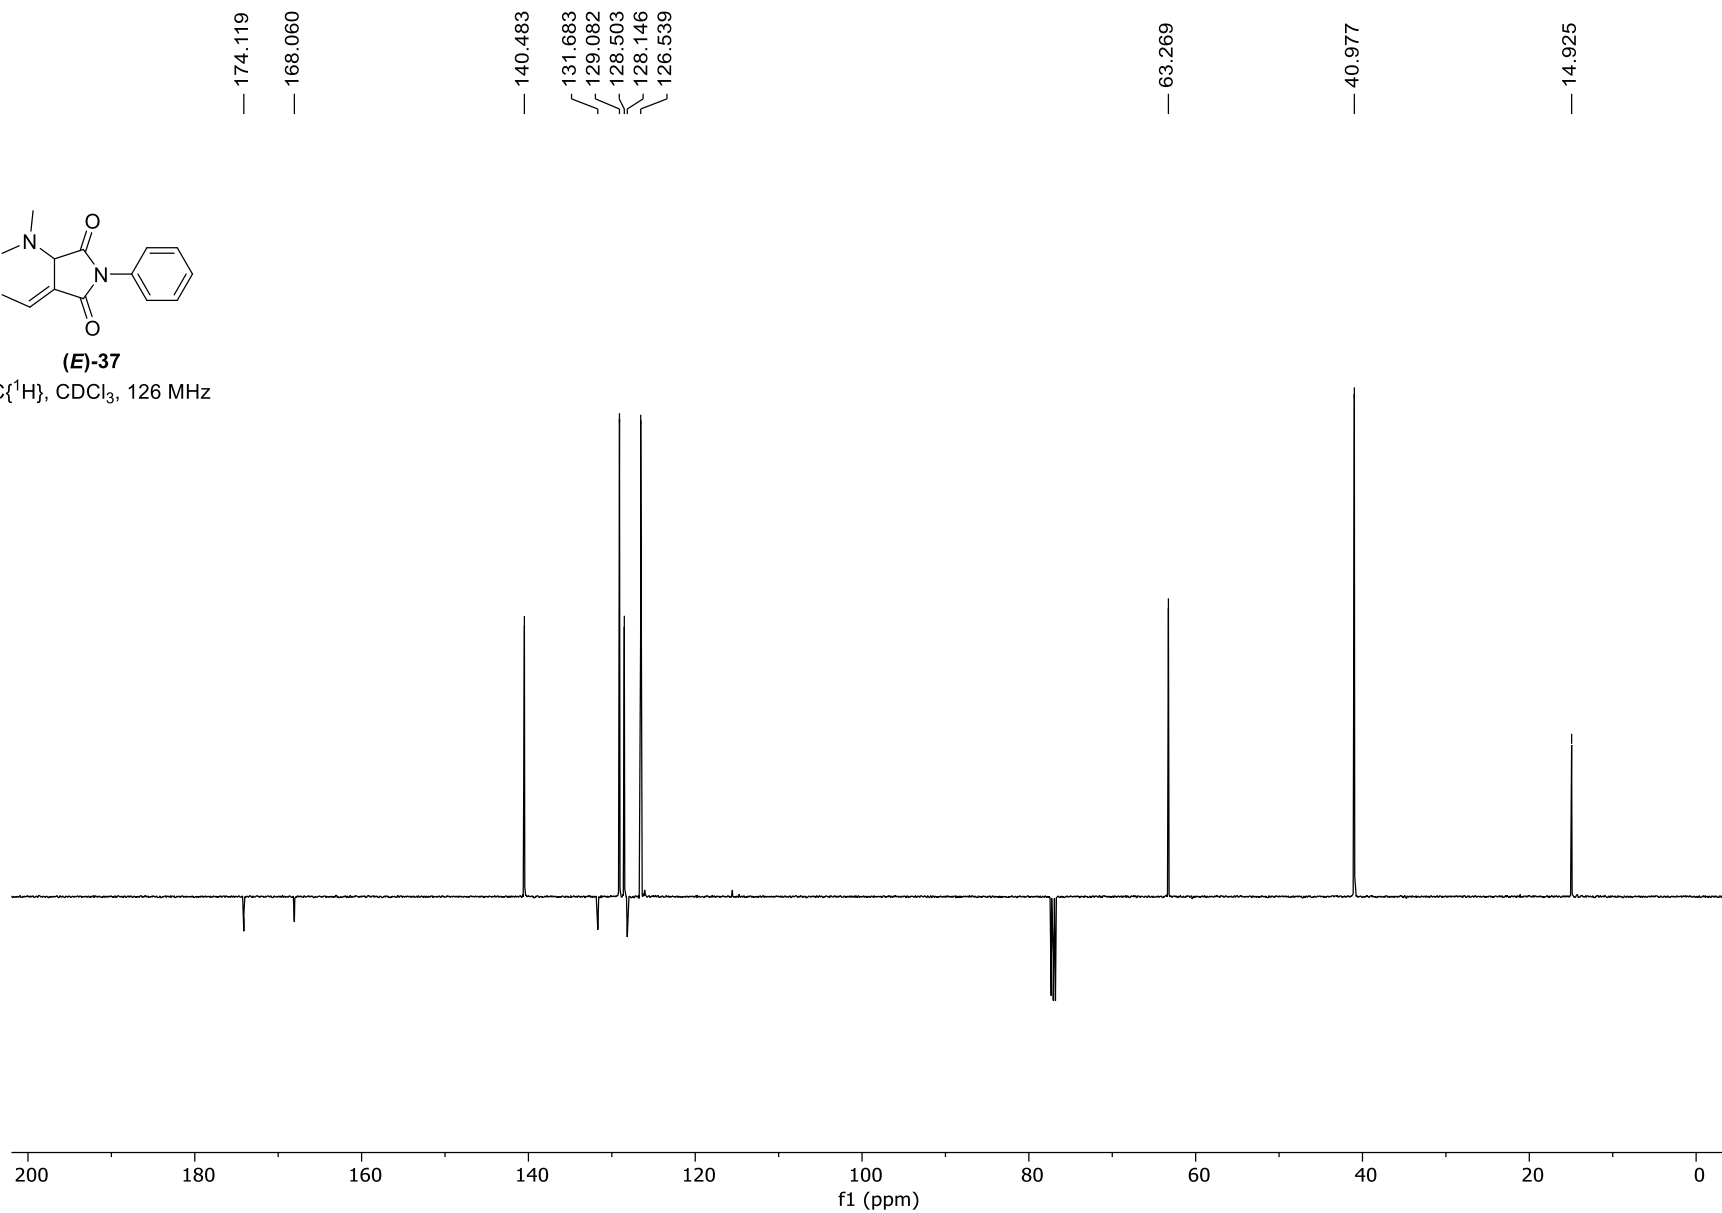

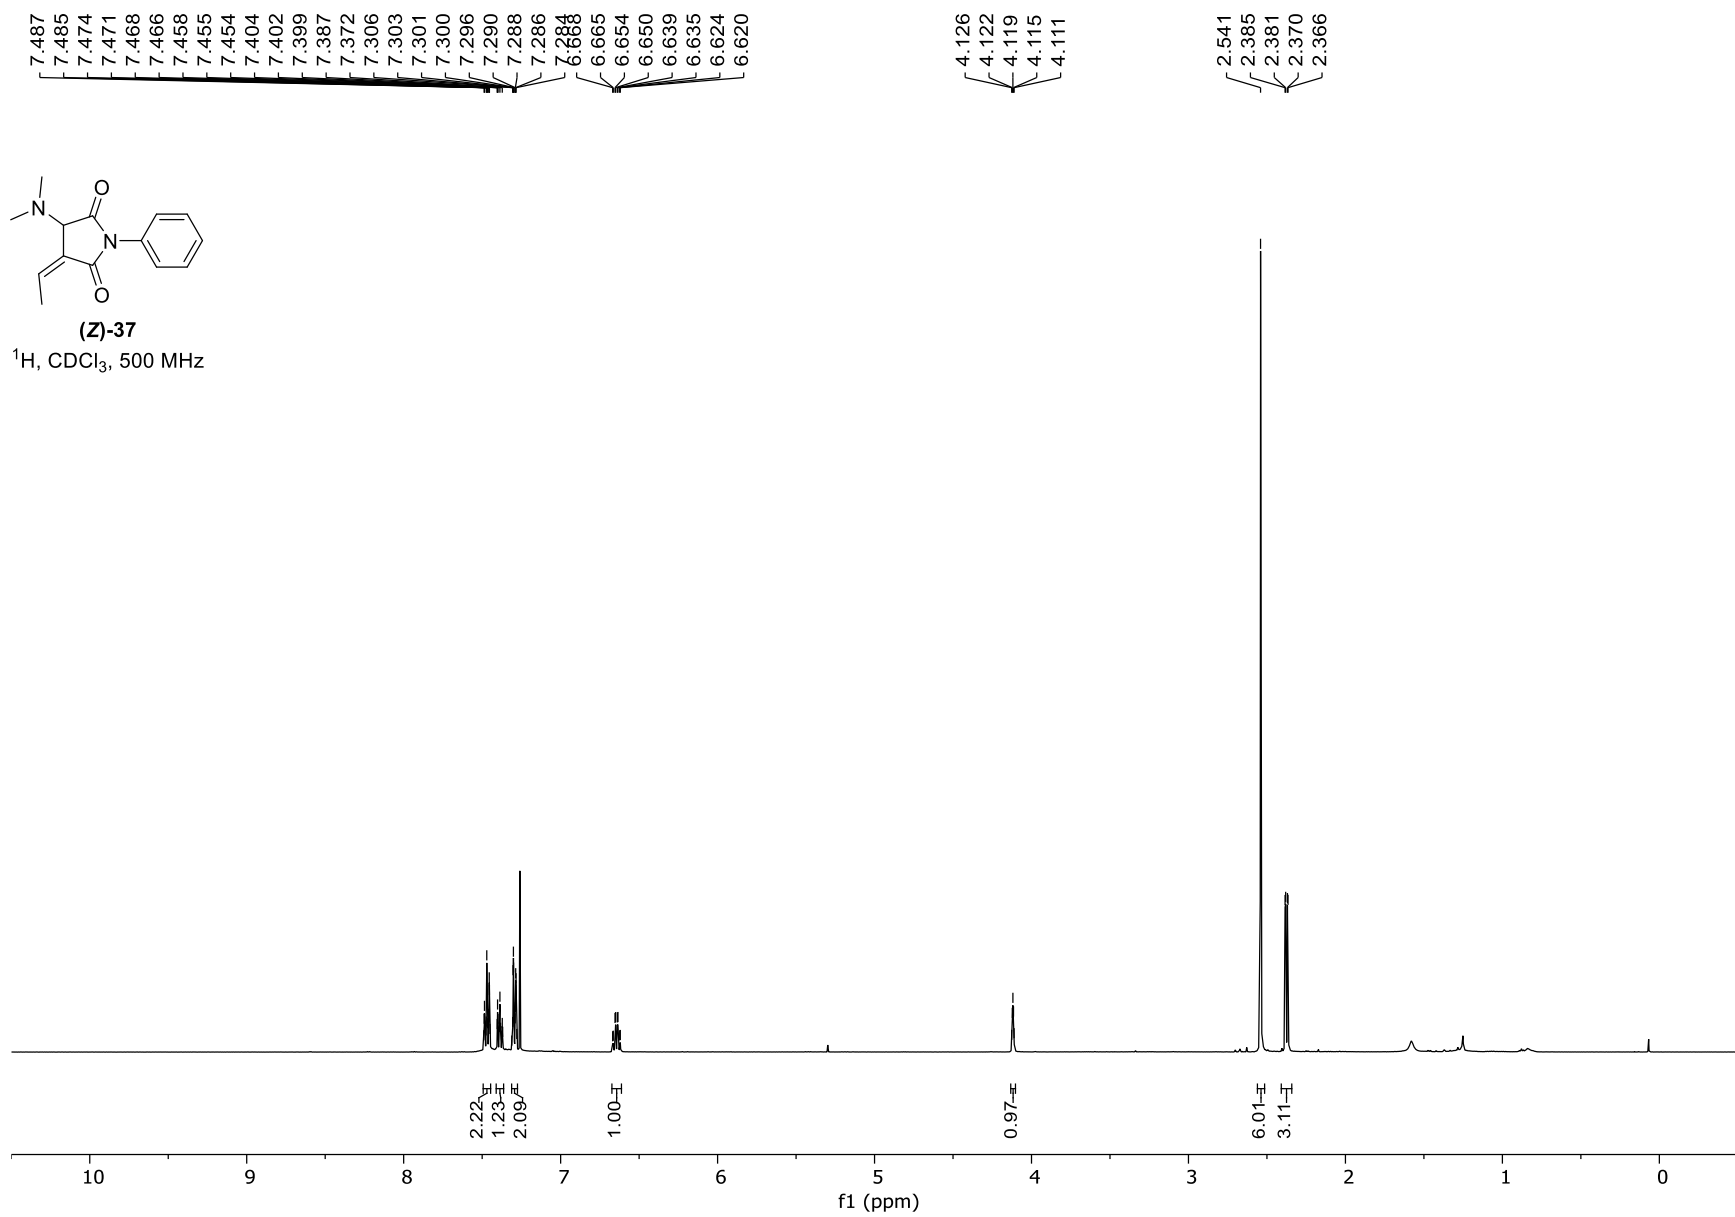

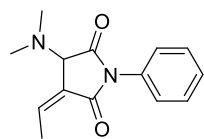

**(Z)-37**

$^{13}\text{C}\{^1\text{H}\}$ ,  $\text{CDCl}_3$ , 126 MHz

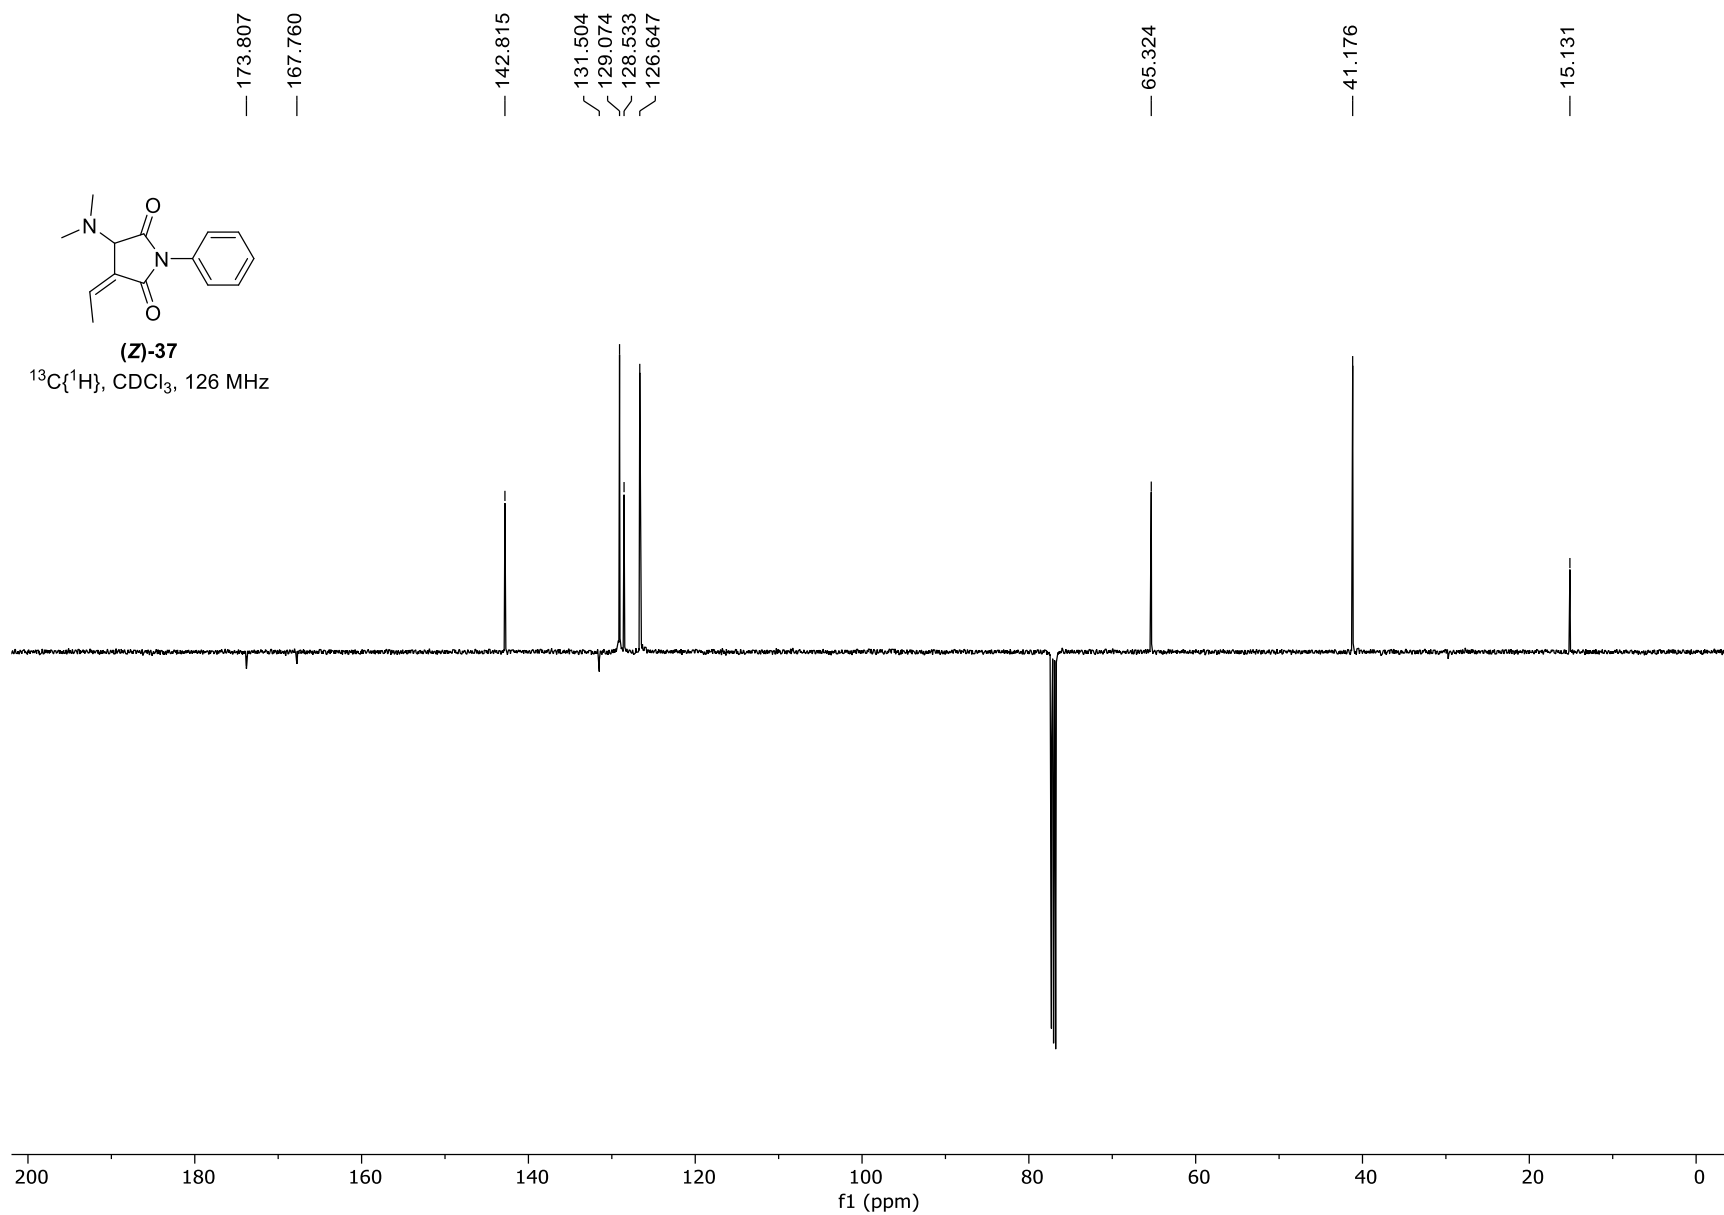

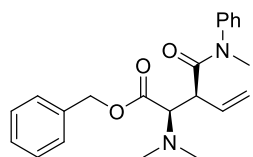

**38<sub>maj</sub>**

<sup>1</sup>H, CDCl<sub>3</sub>, 500 MHz

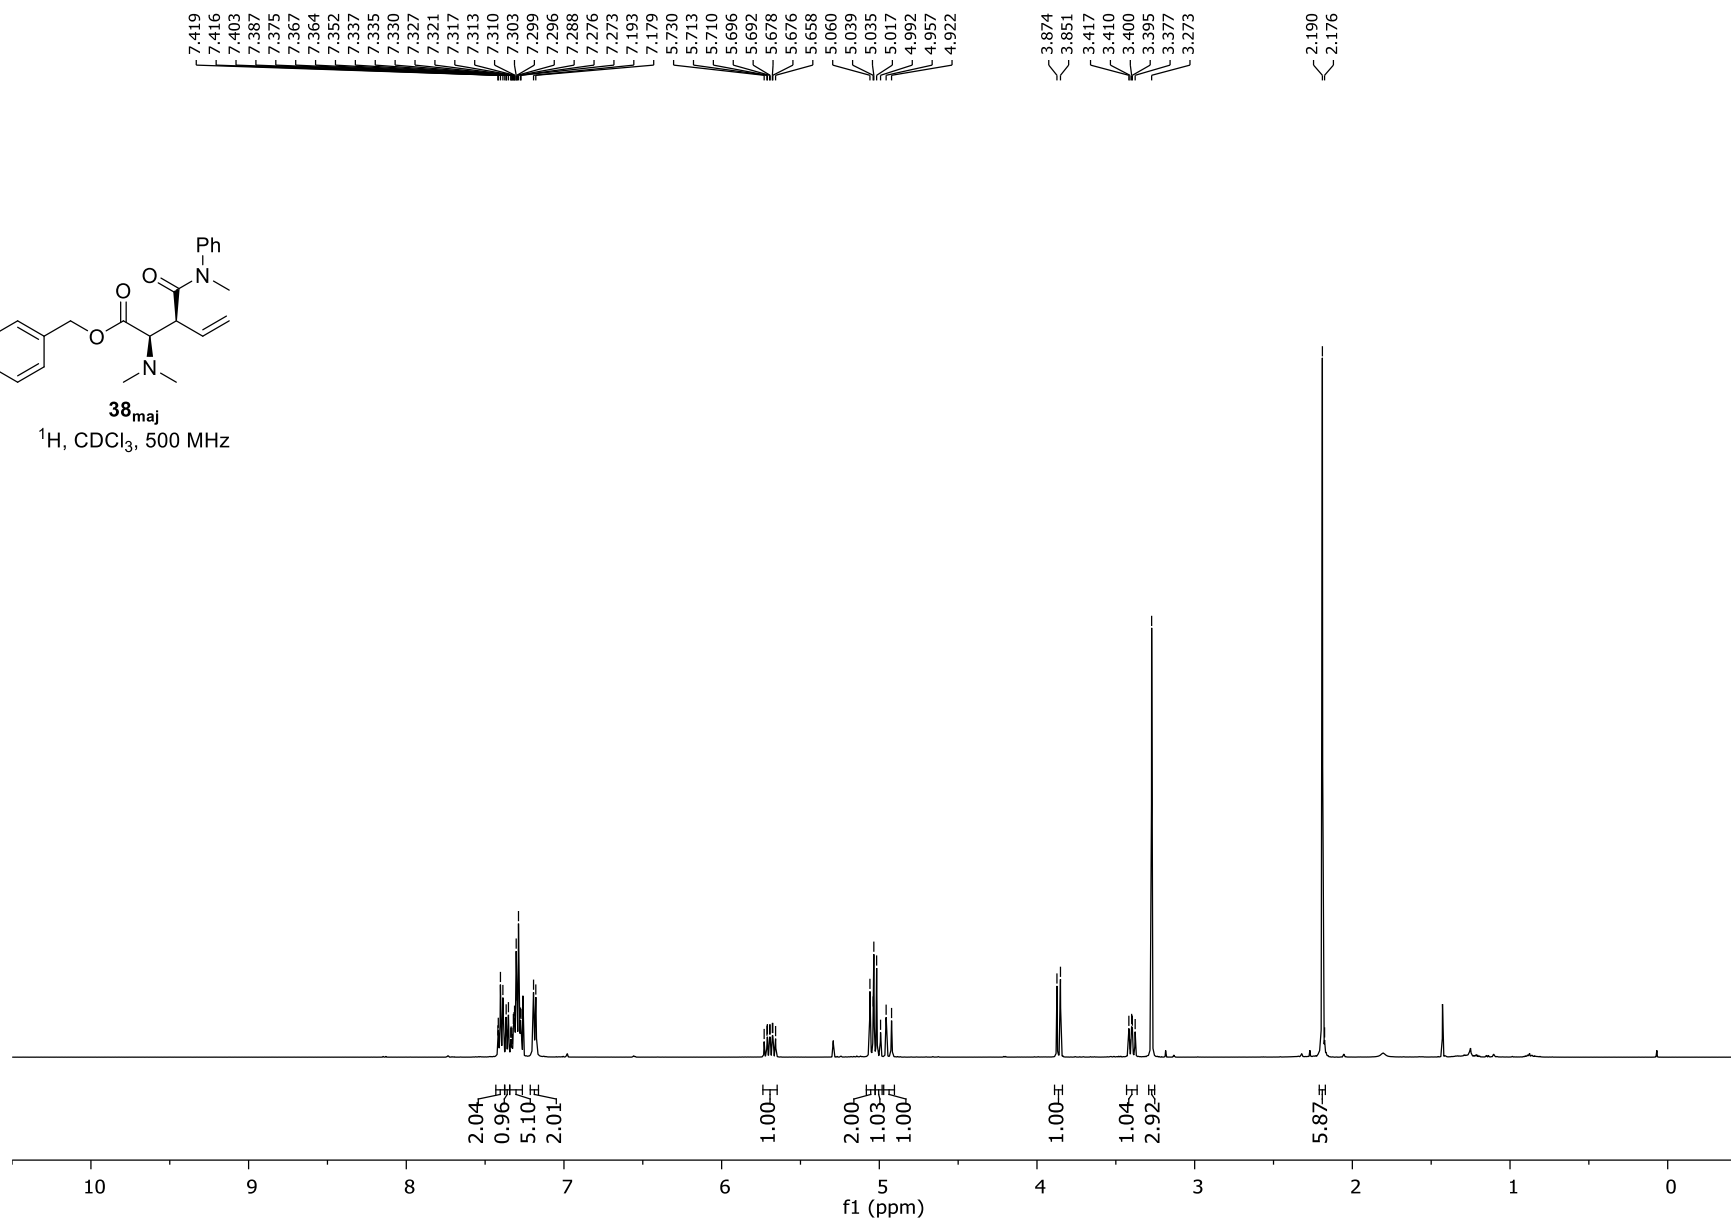

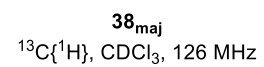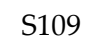

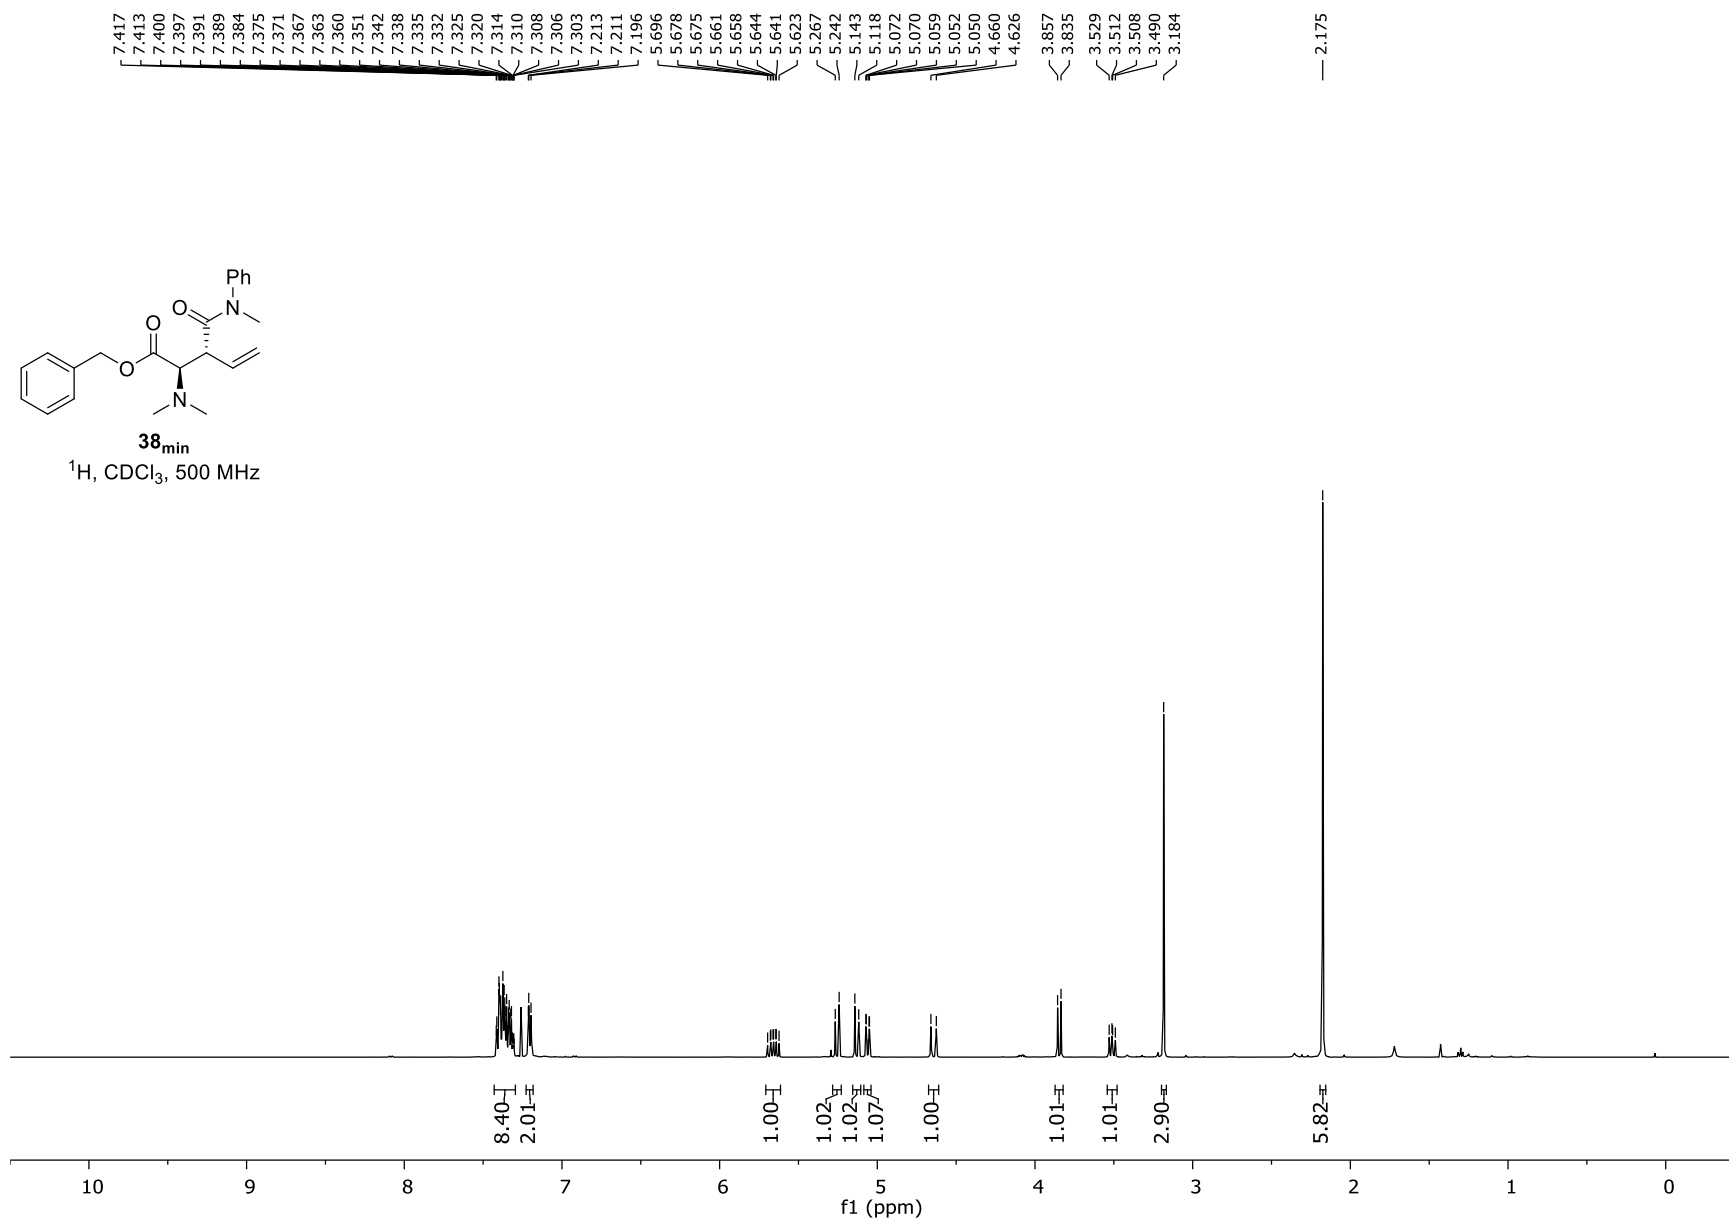

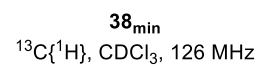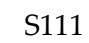

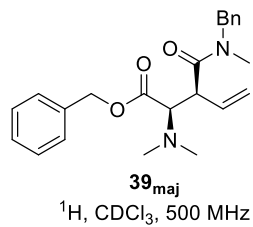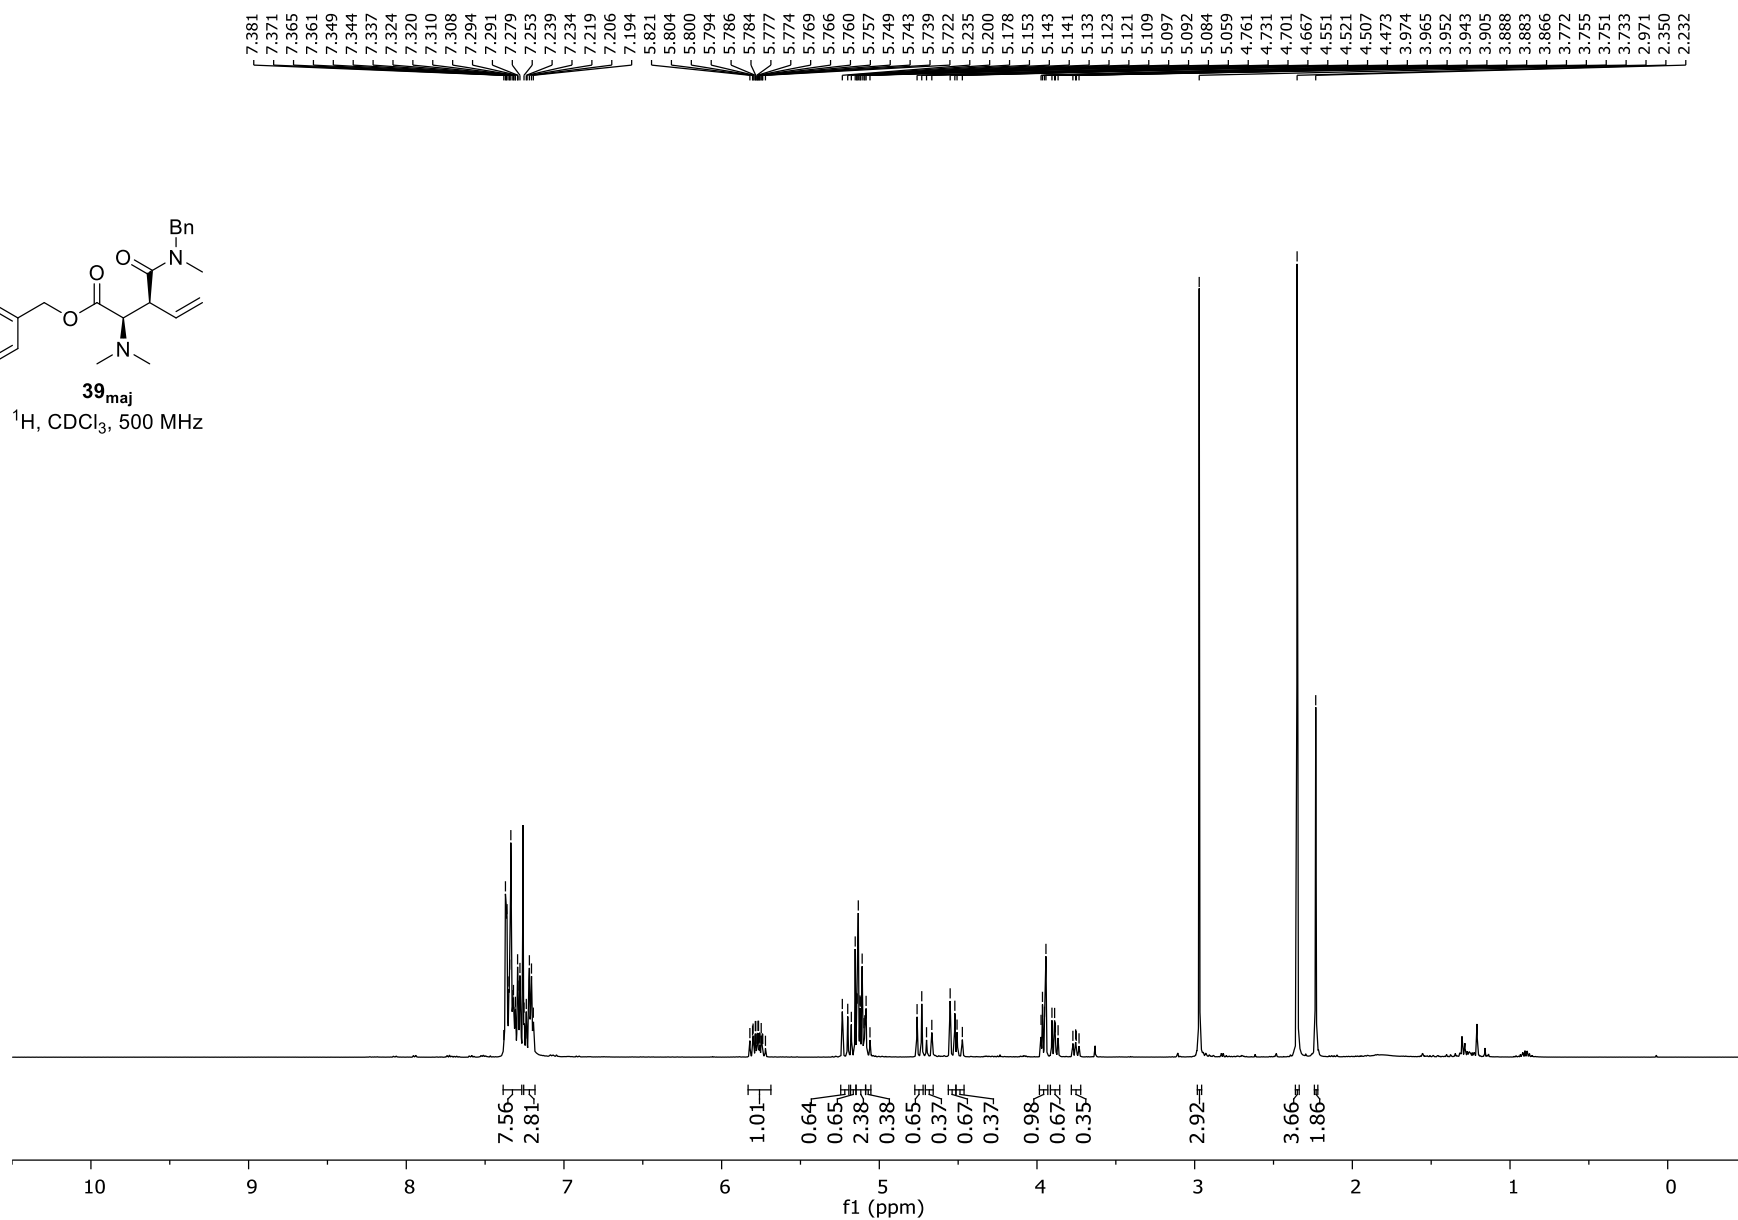



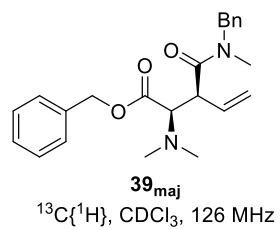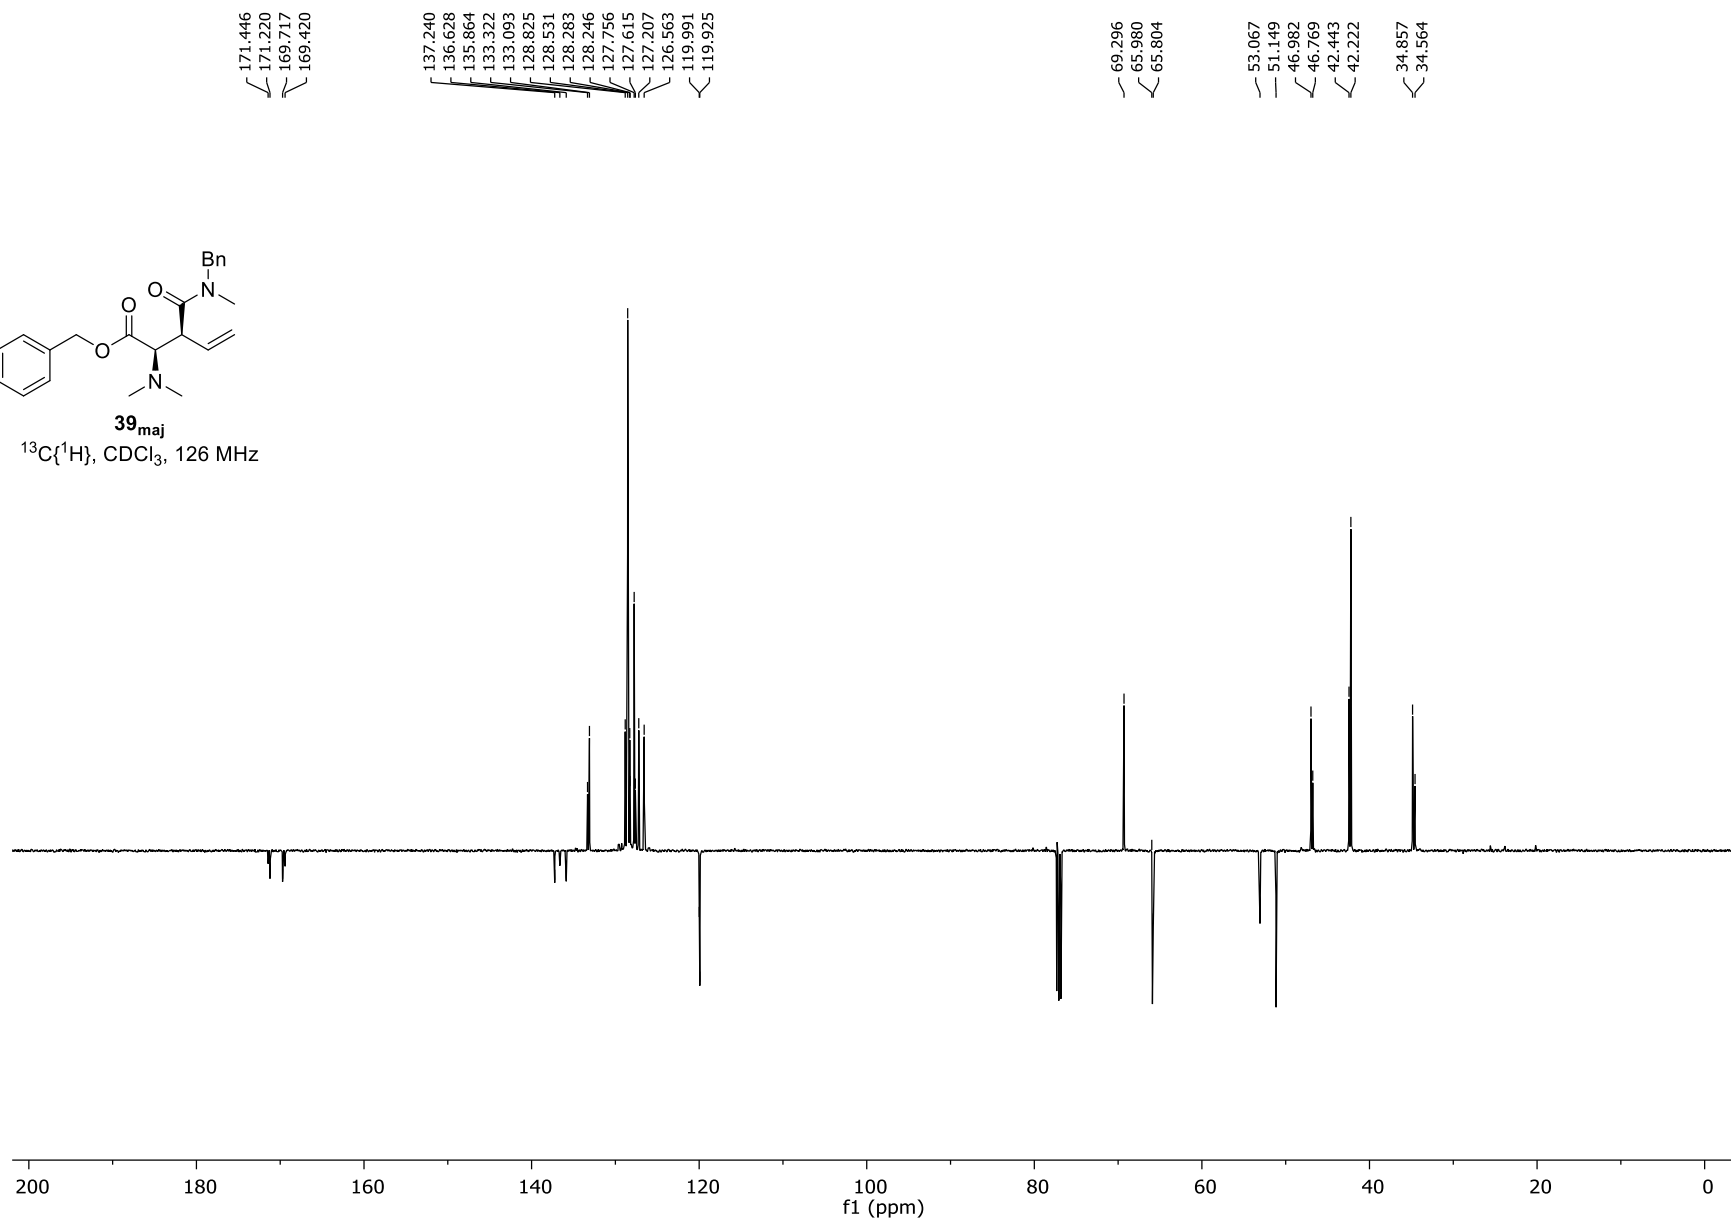

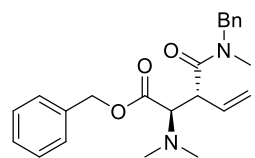

**39<sub>min</sub>**  
<sup>1</sup>H, CDCl<sub>3</sub>, 500 MHz

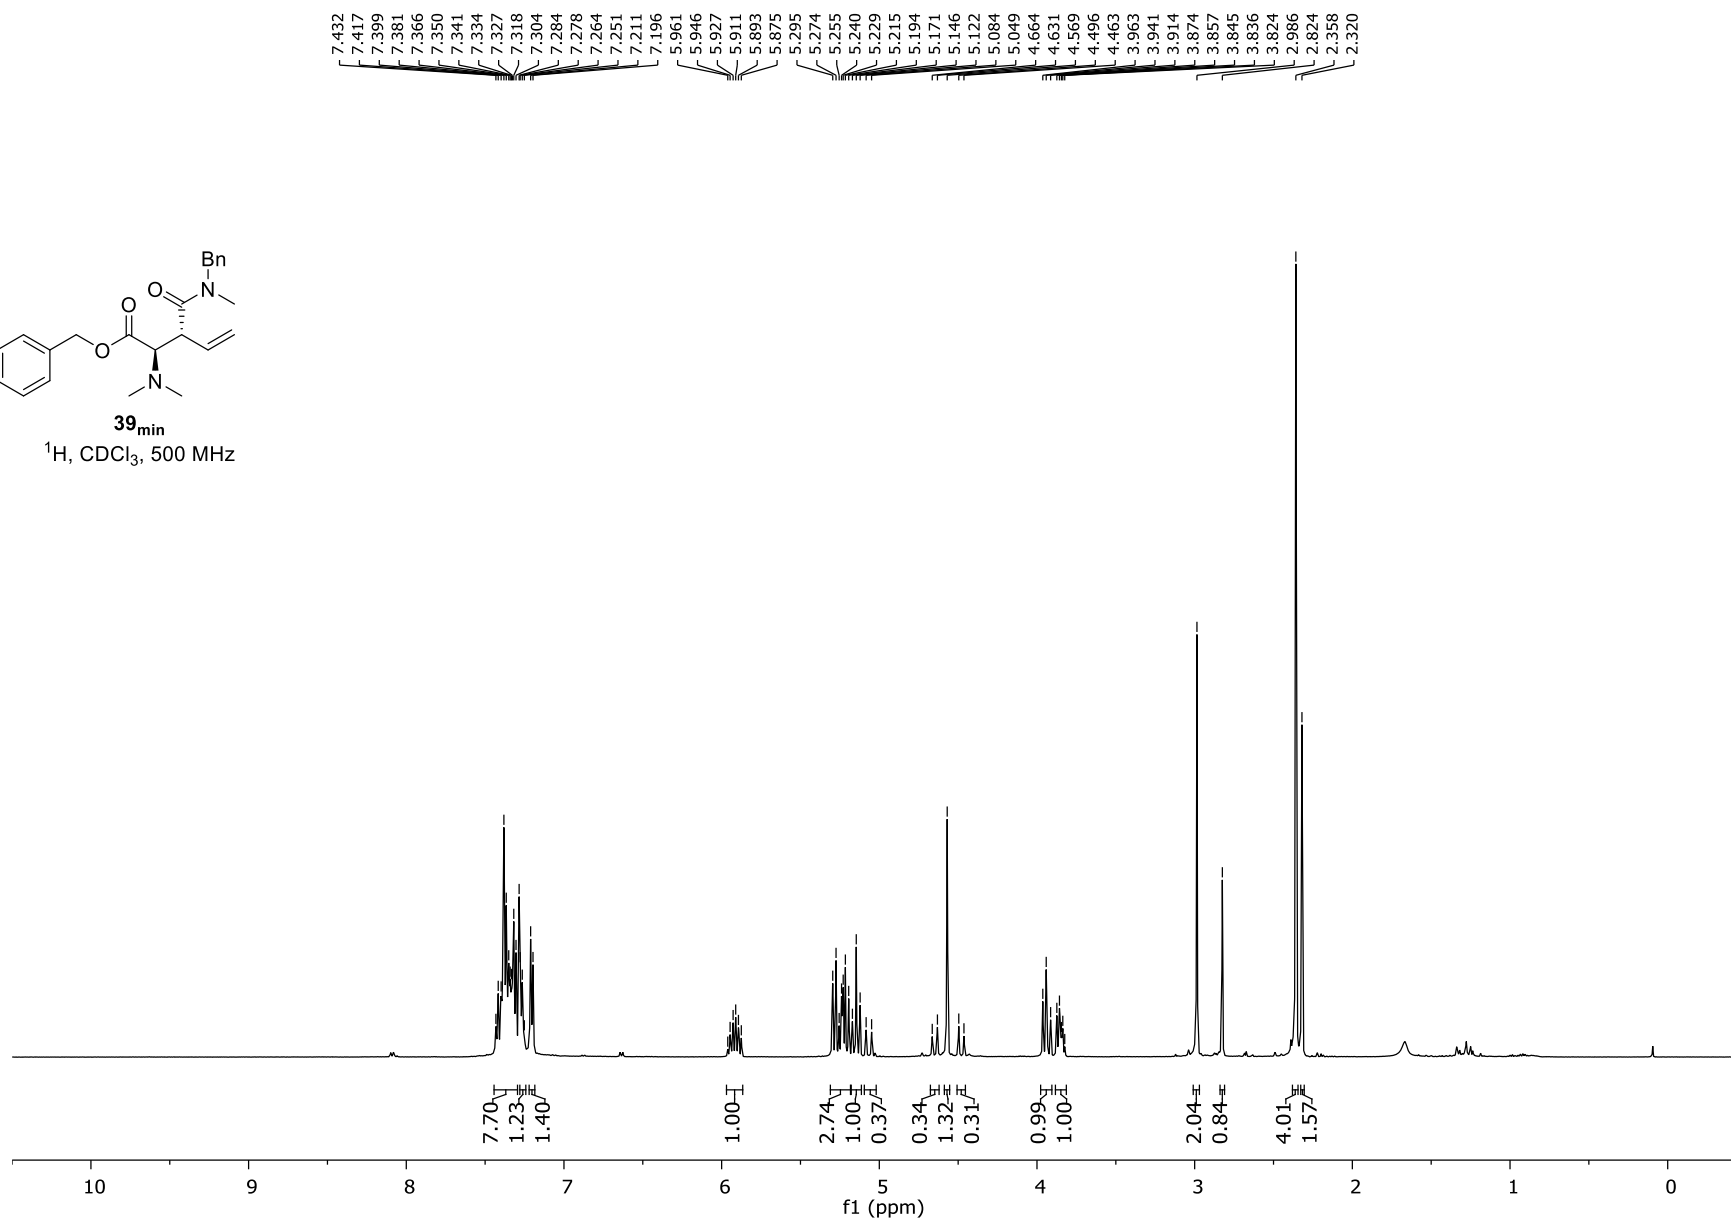

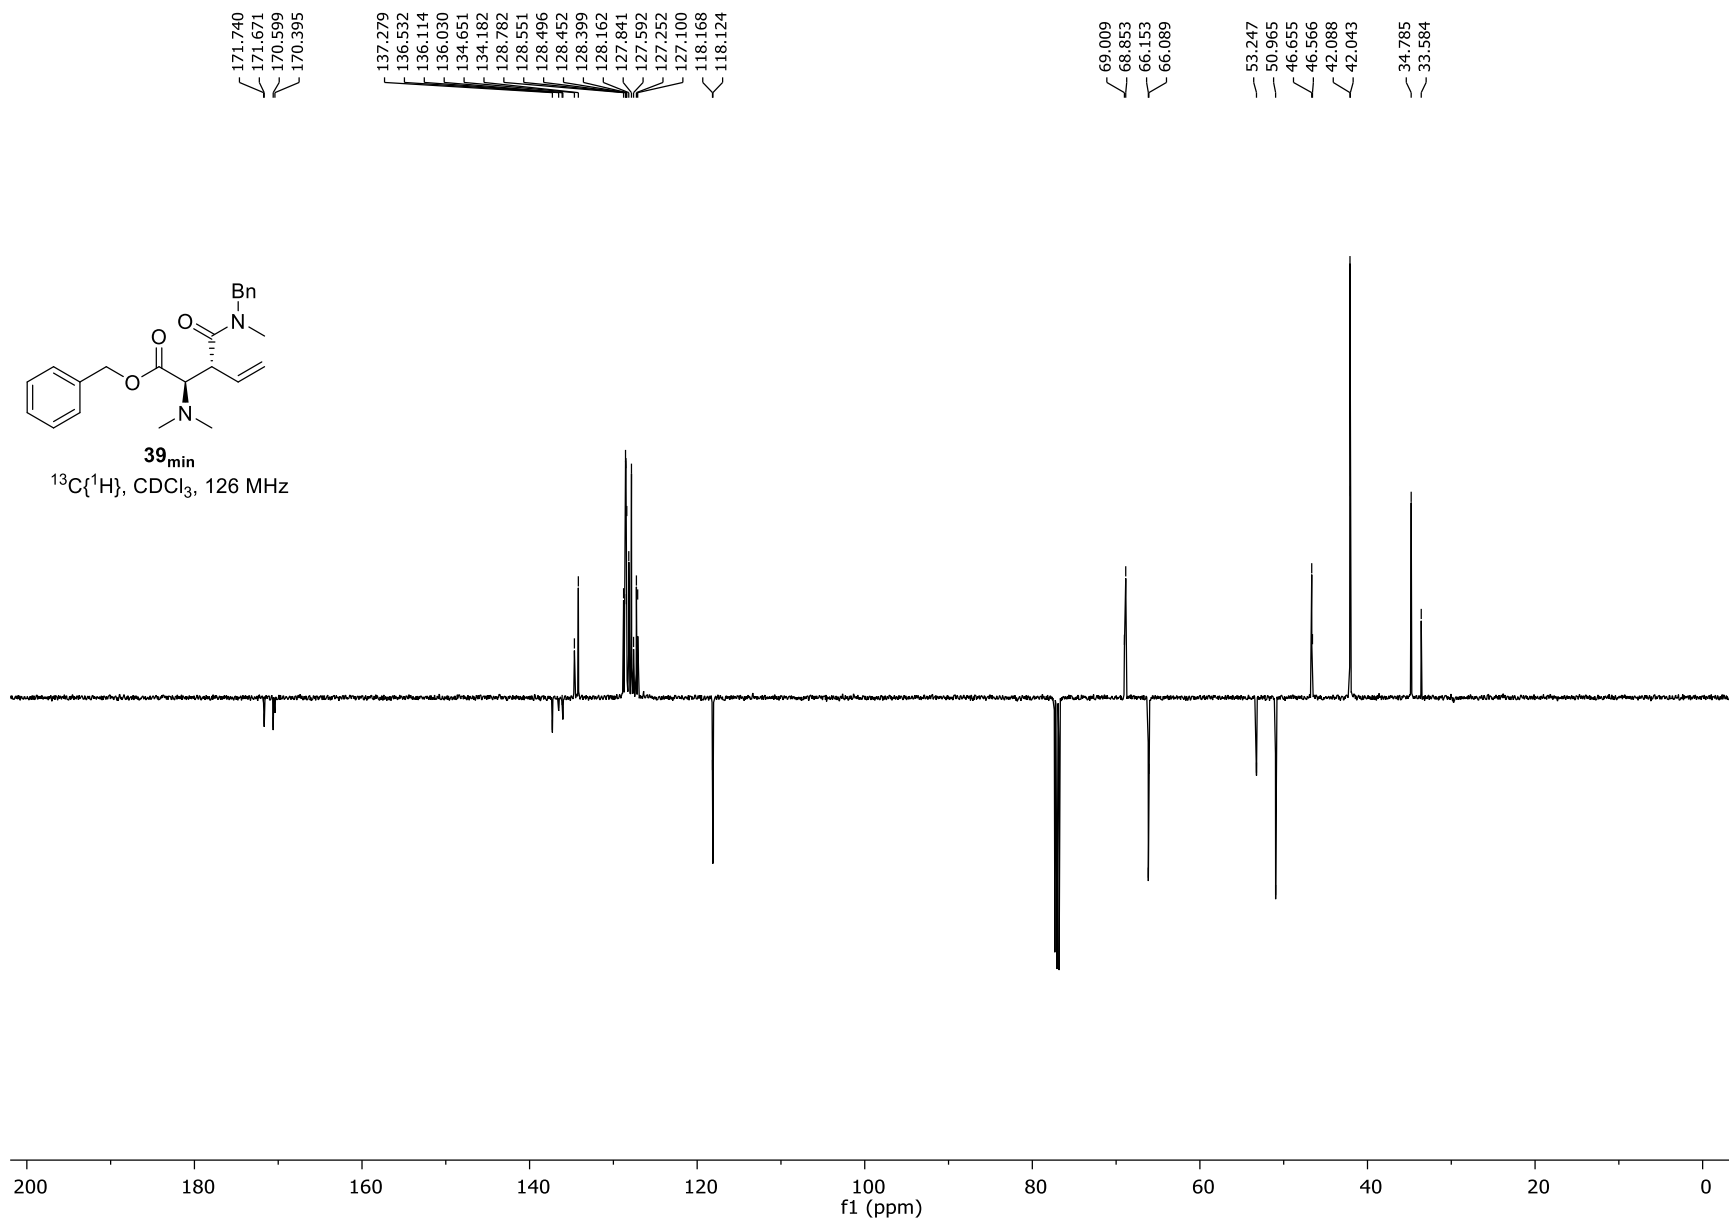

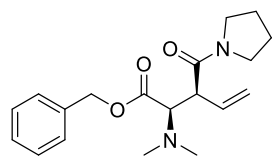

**40<sub>maj</sub>**  
<sup>1</sup>H, CDCl<sub>3</sub>, 500 MHz

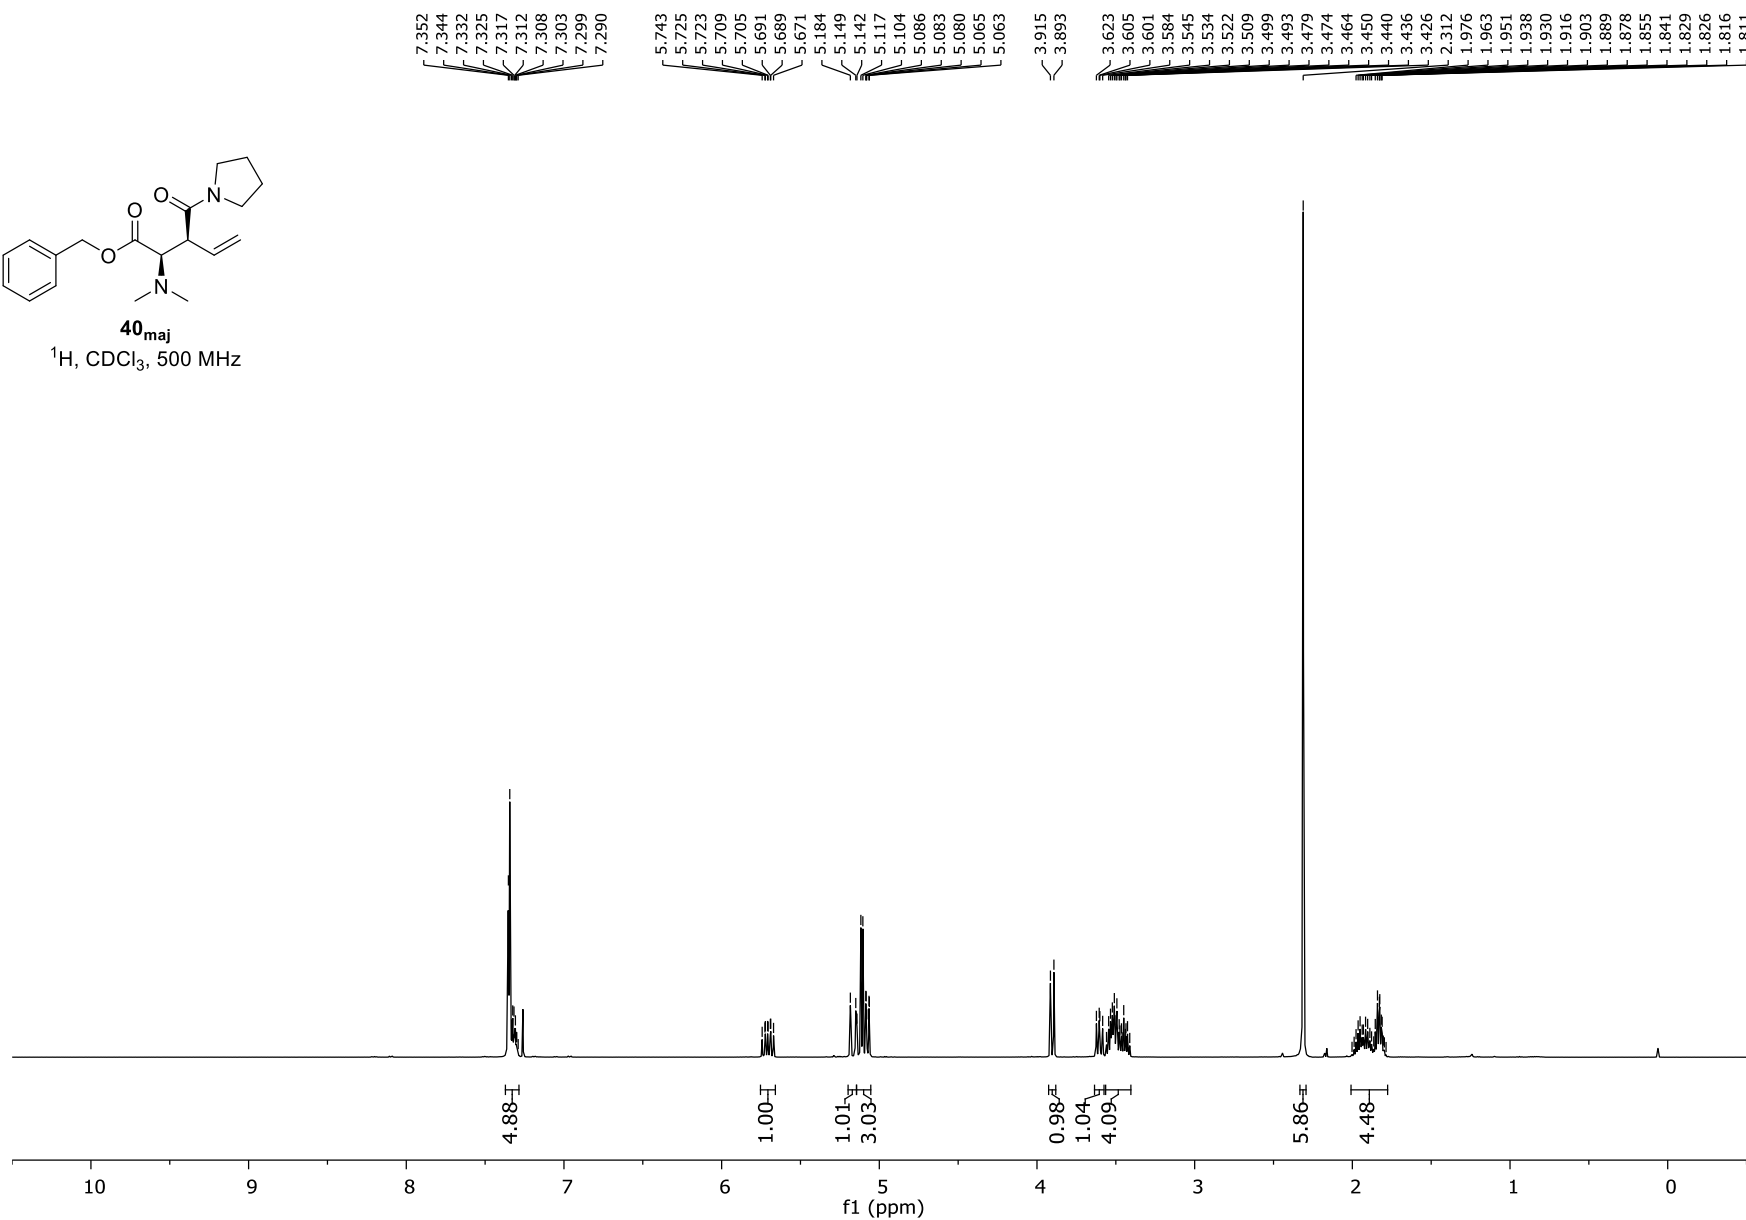

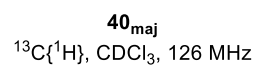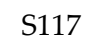

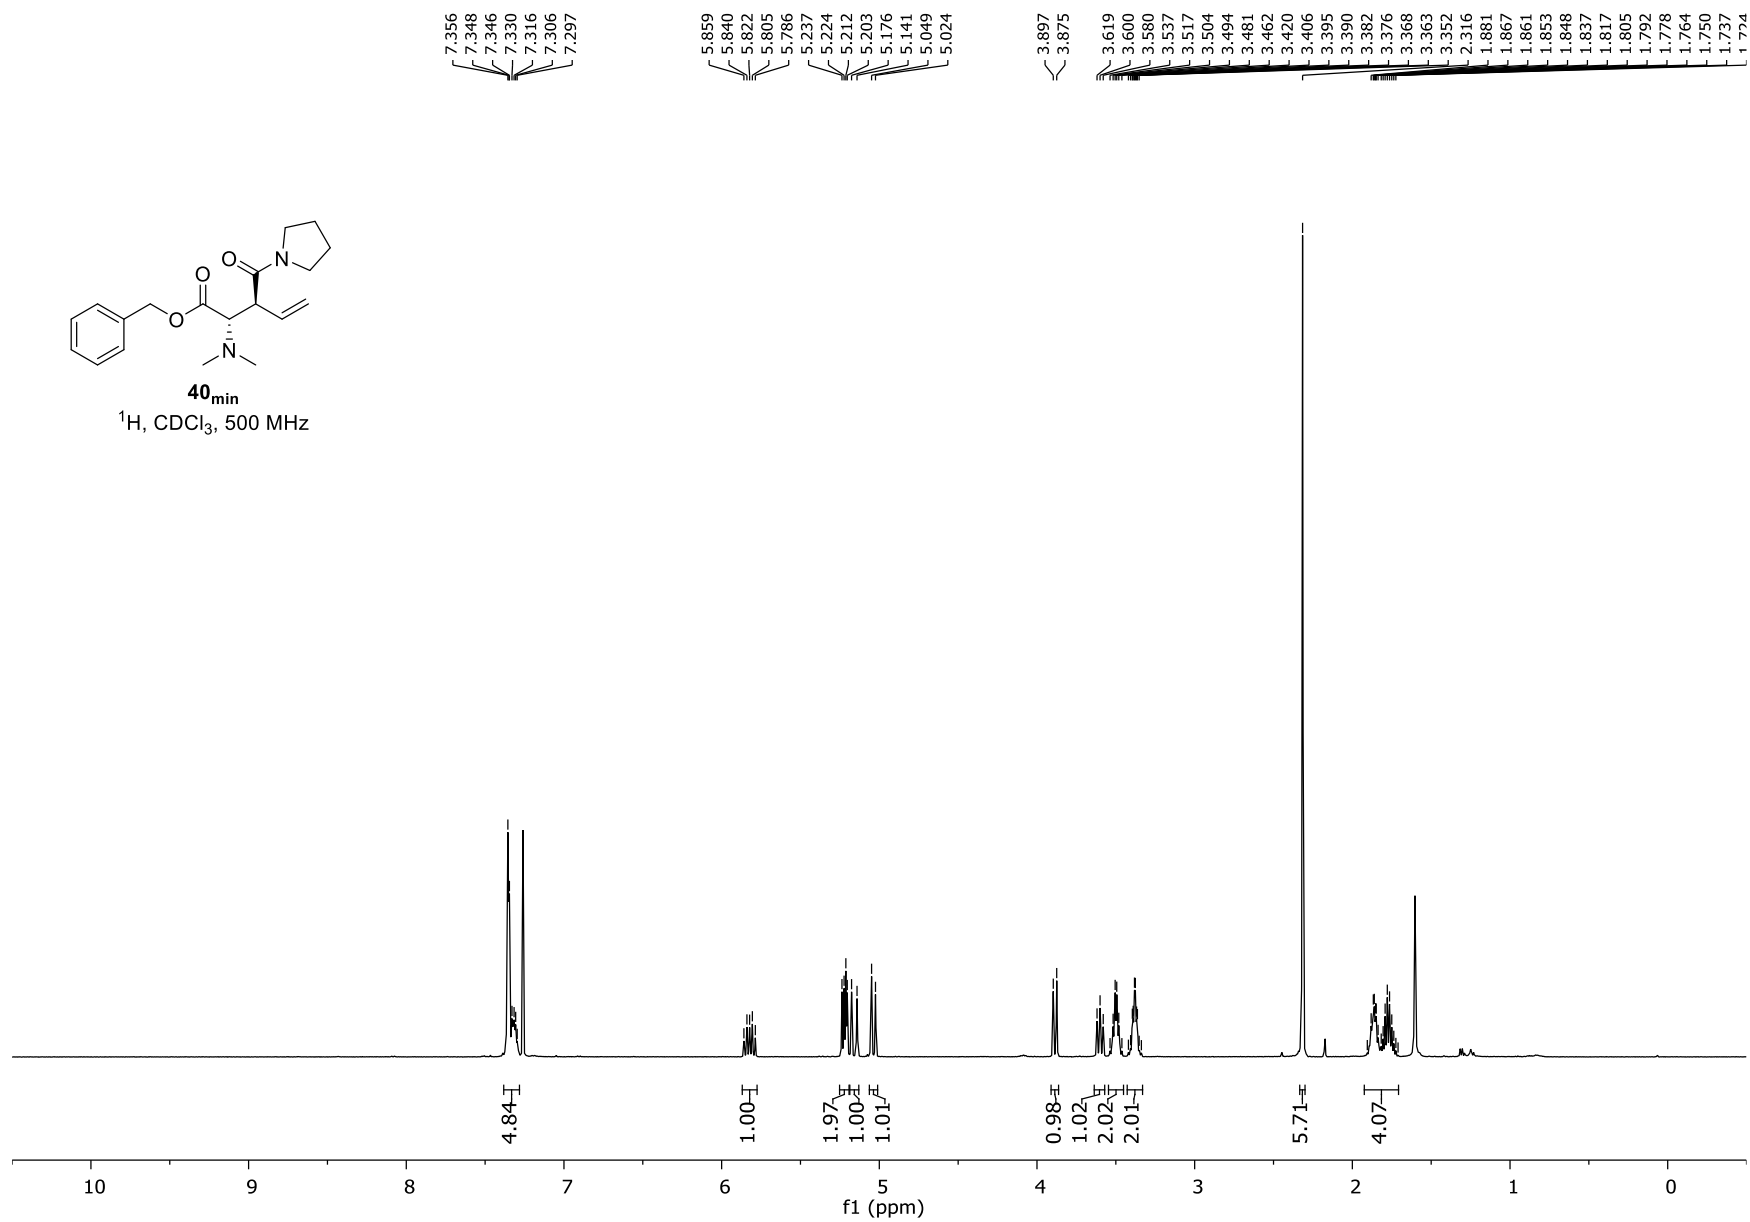

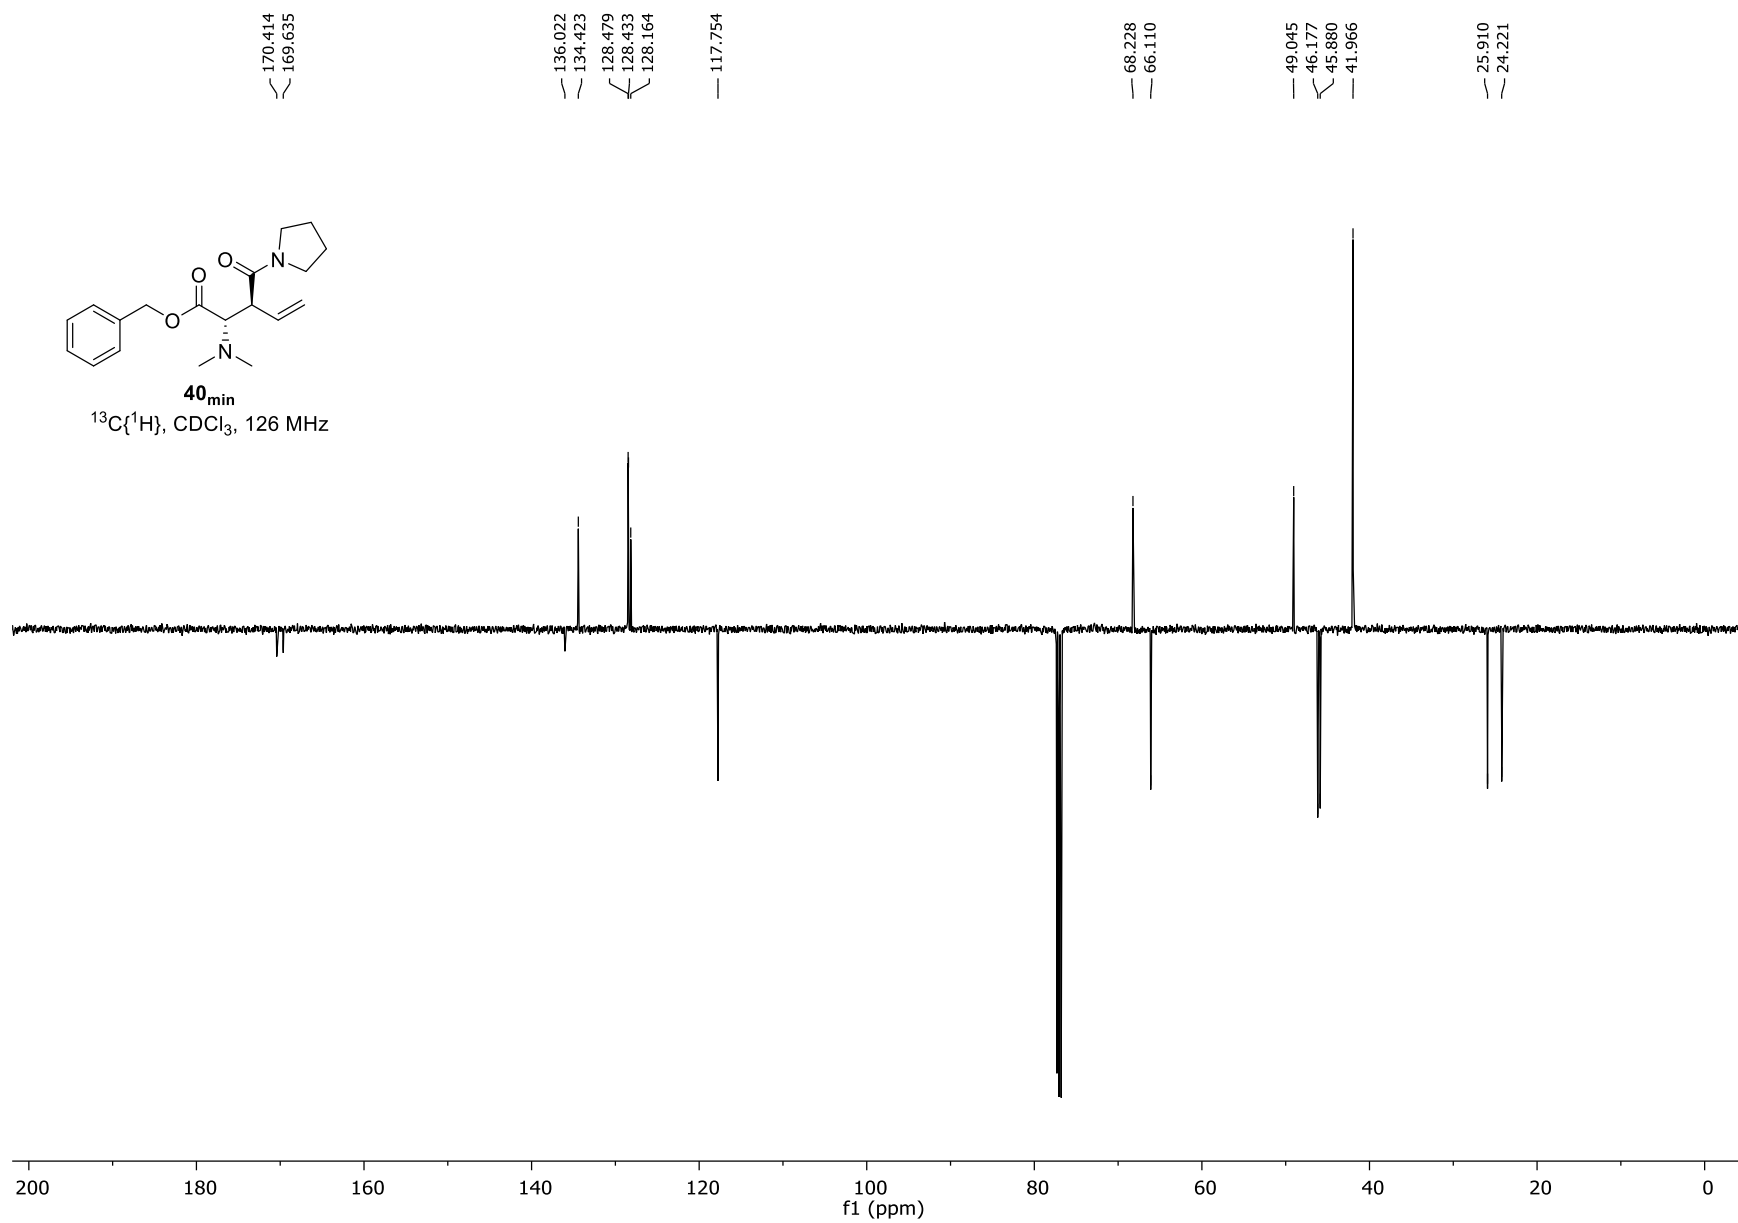

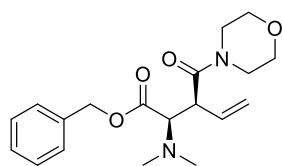

**41<sub>maj</sub>**

<sup>1</sup>H, CDCl<sub>3</sub>, 500 MHz

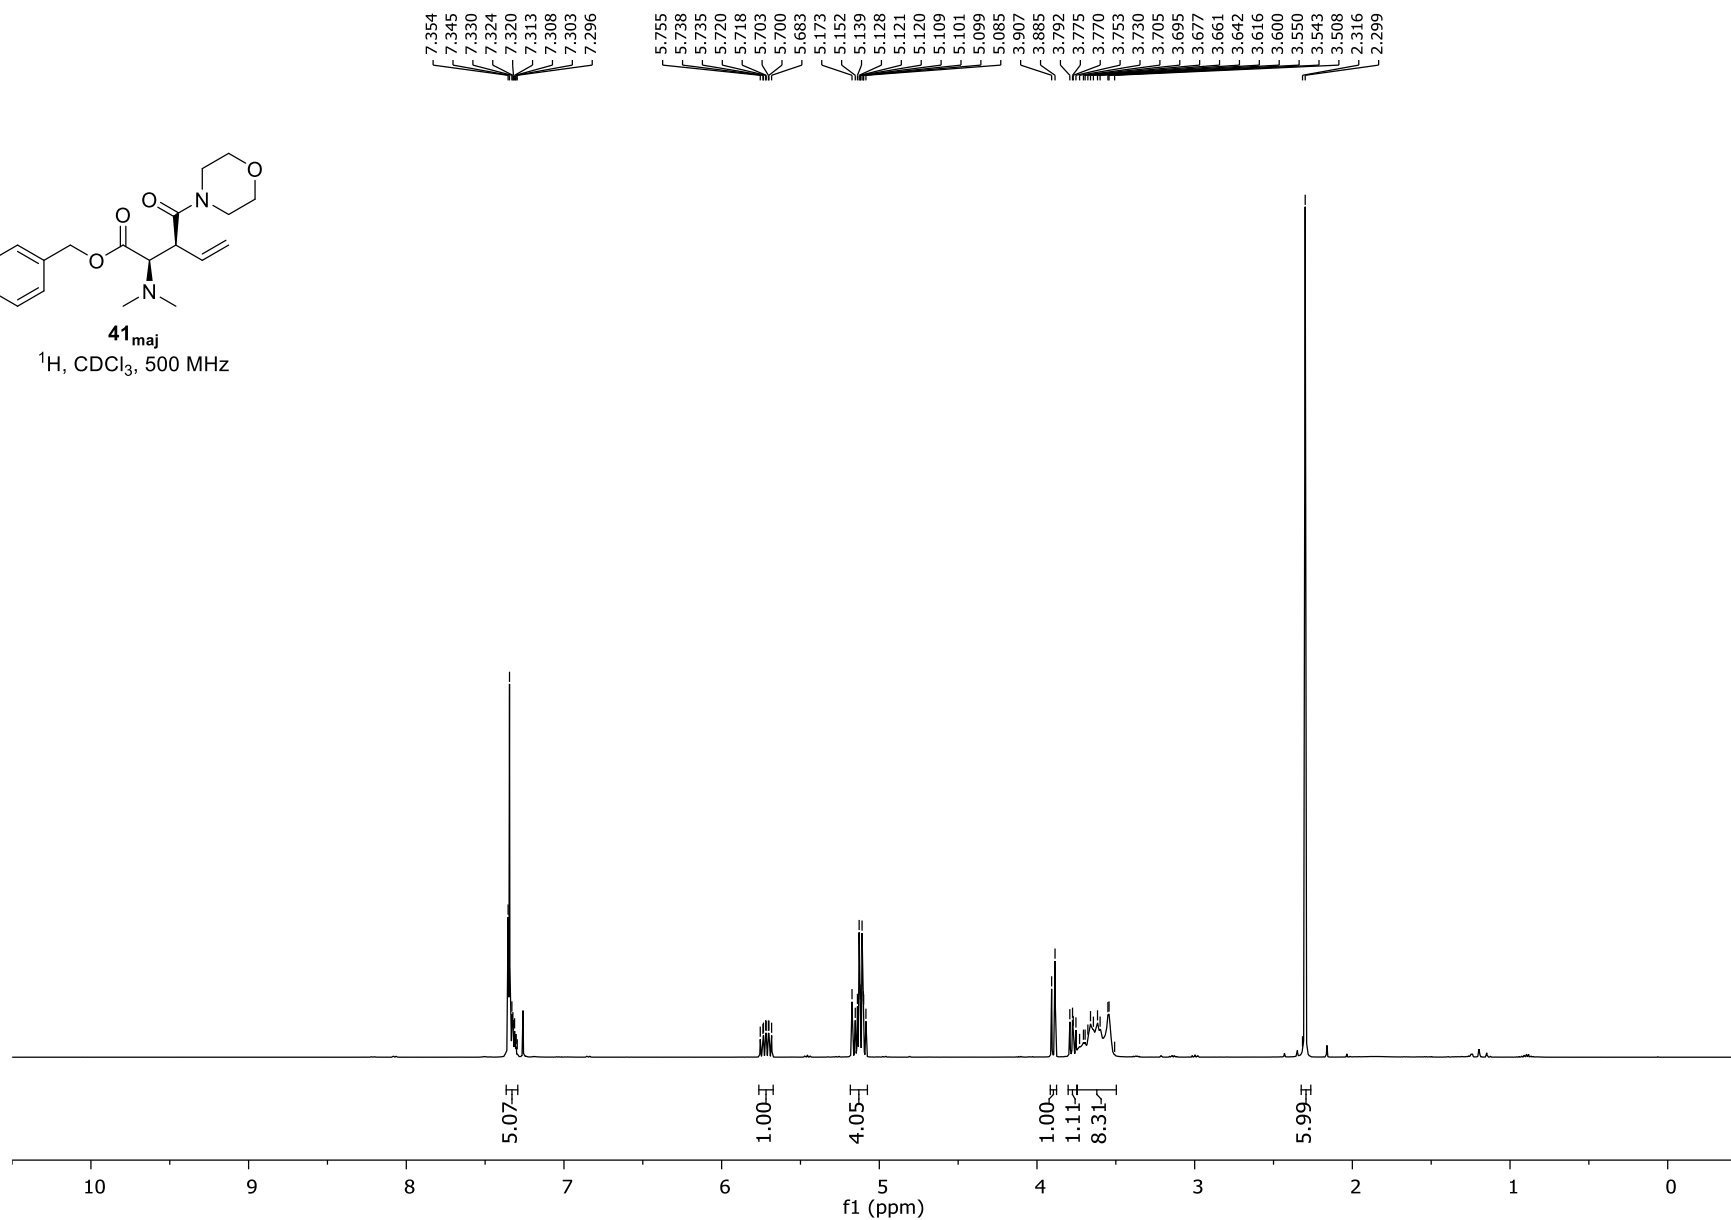



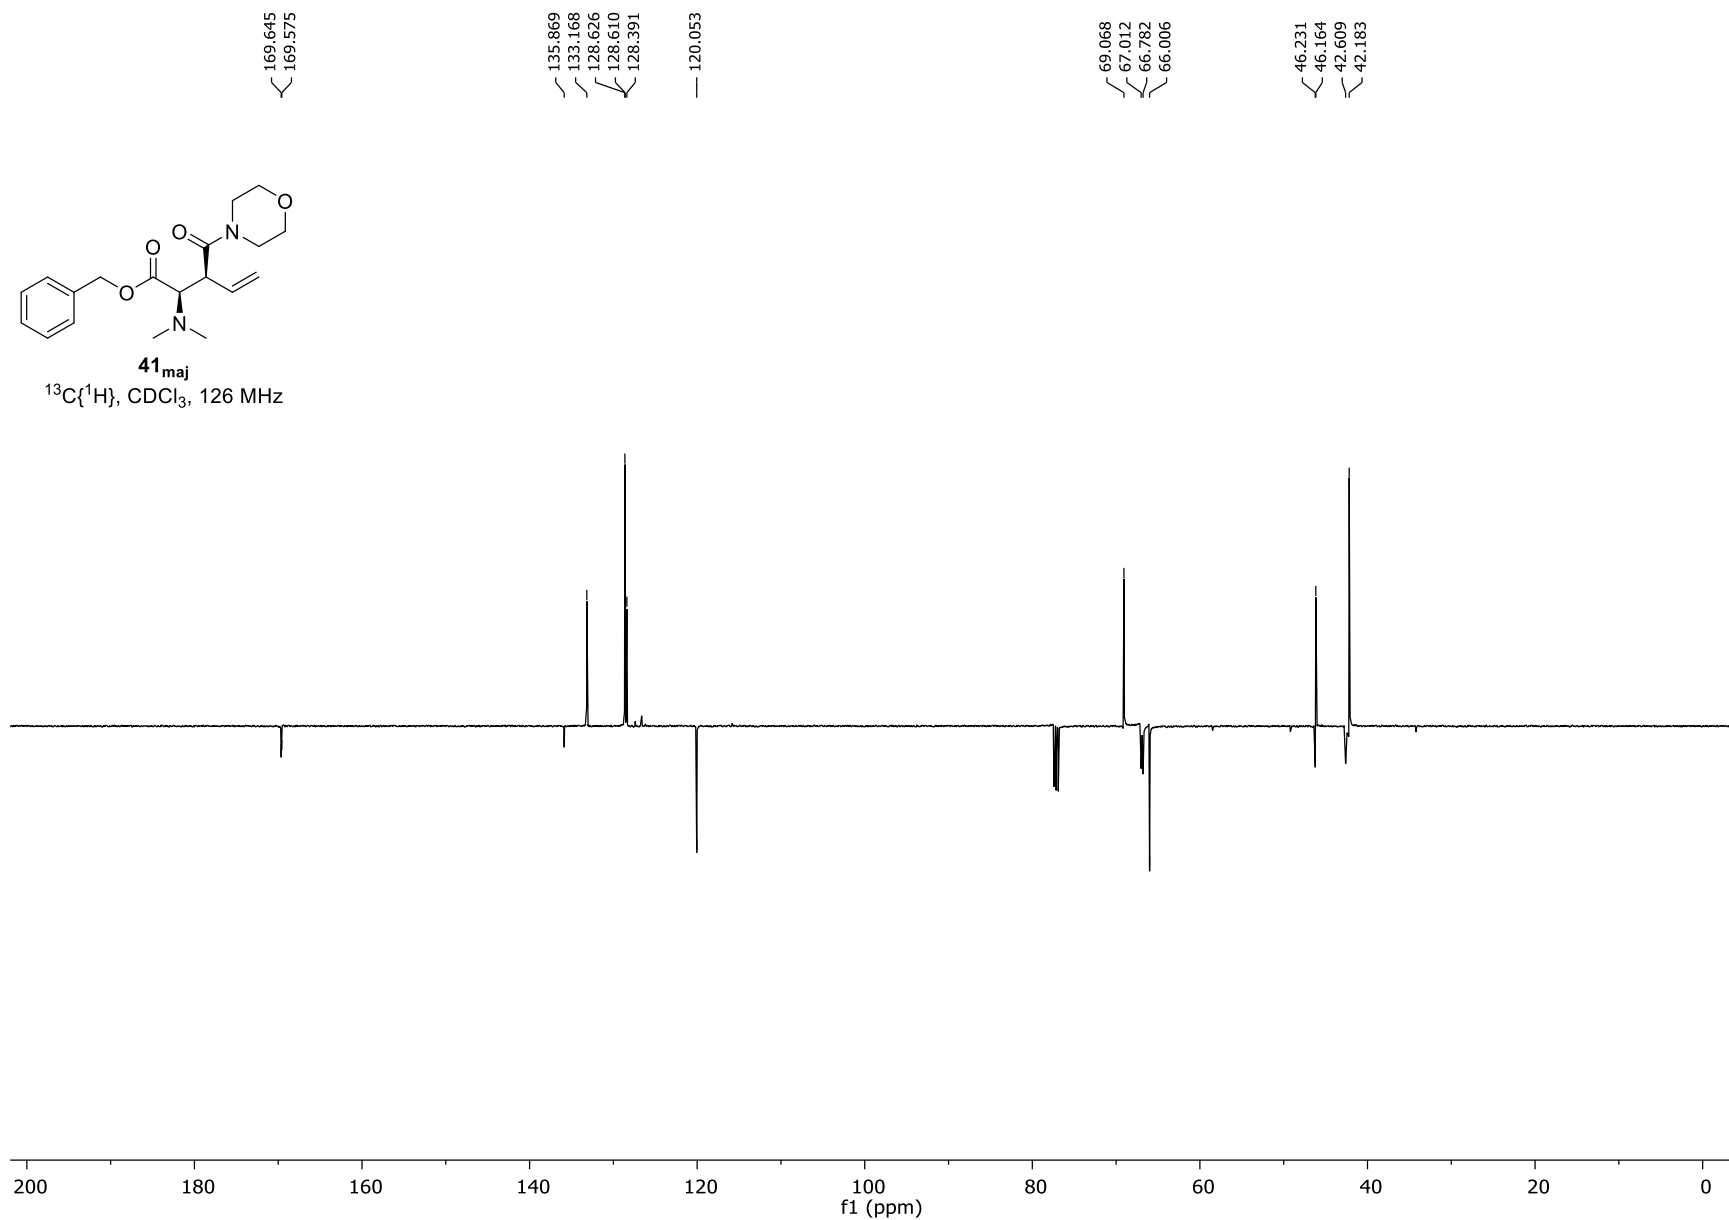

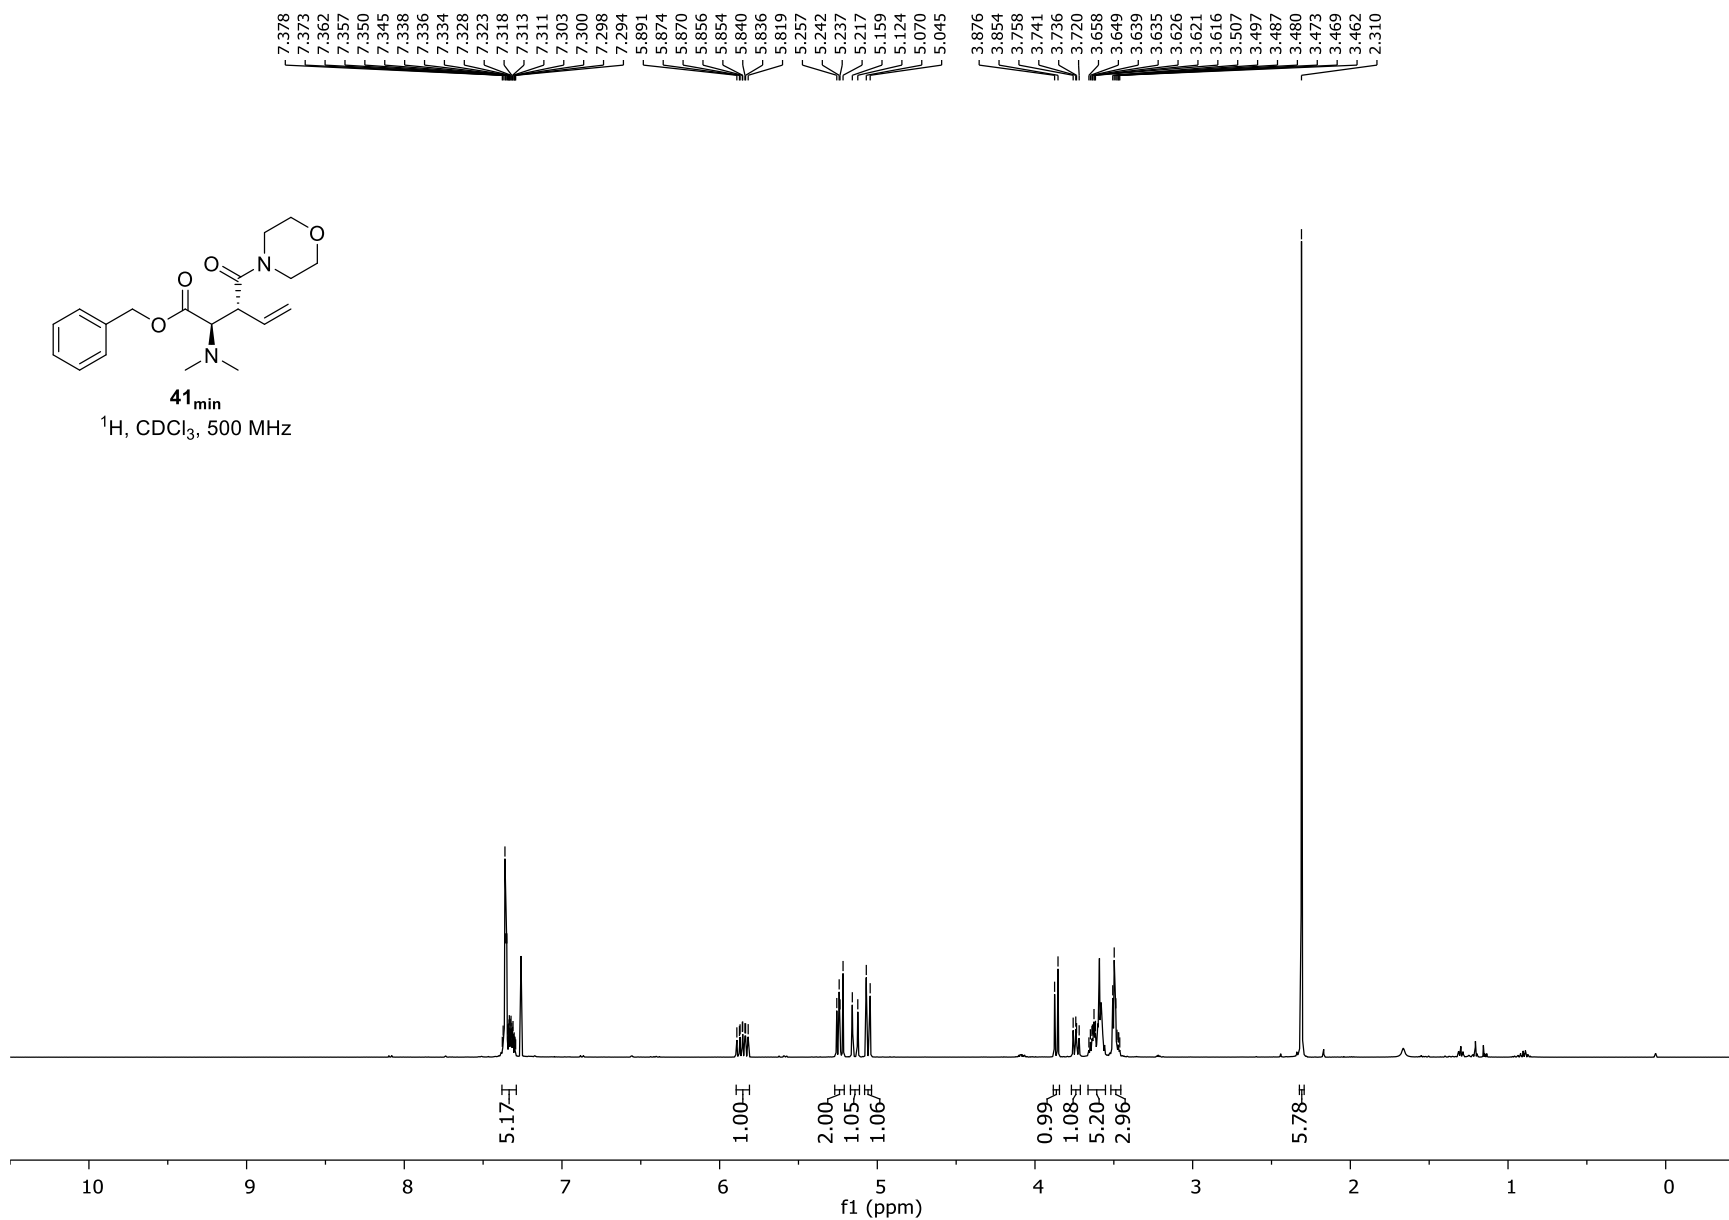

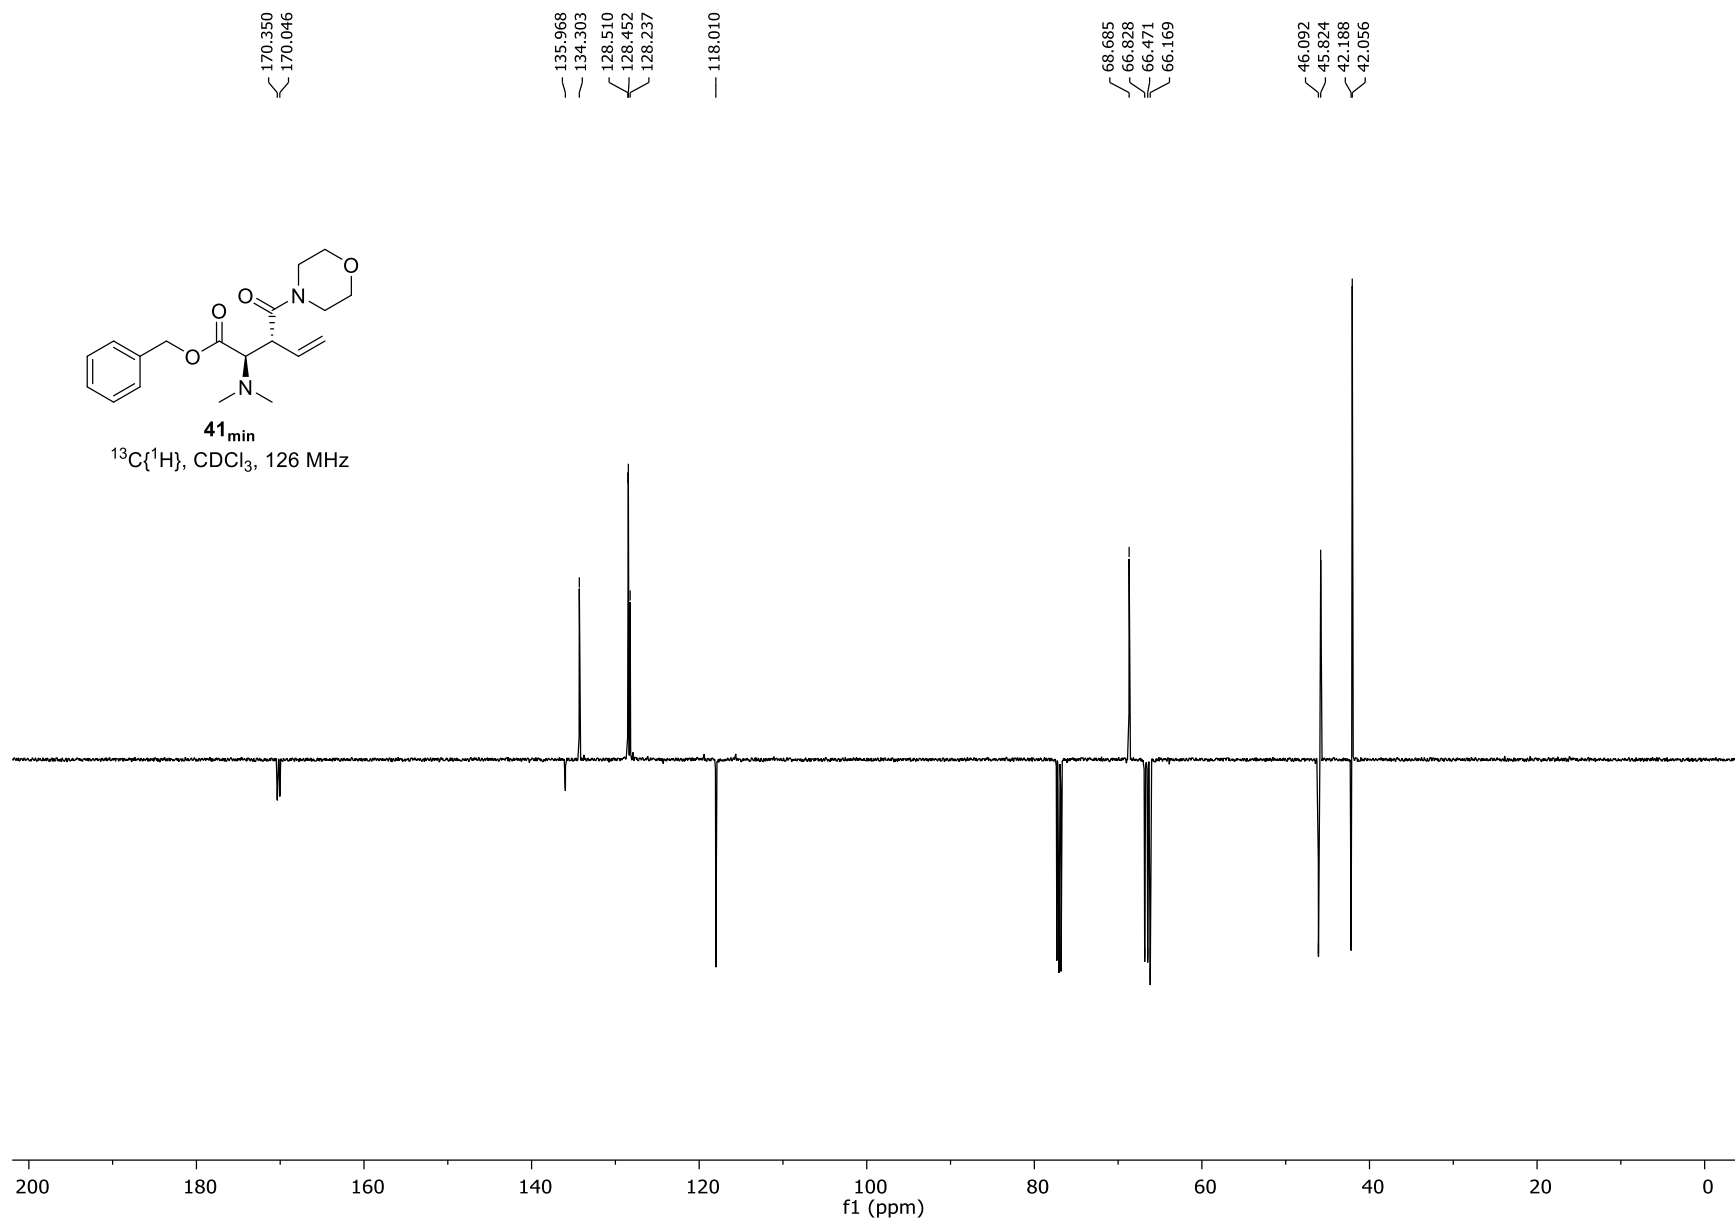

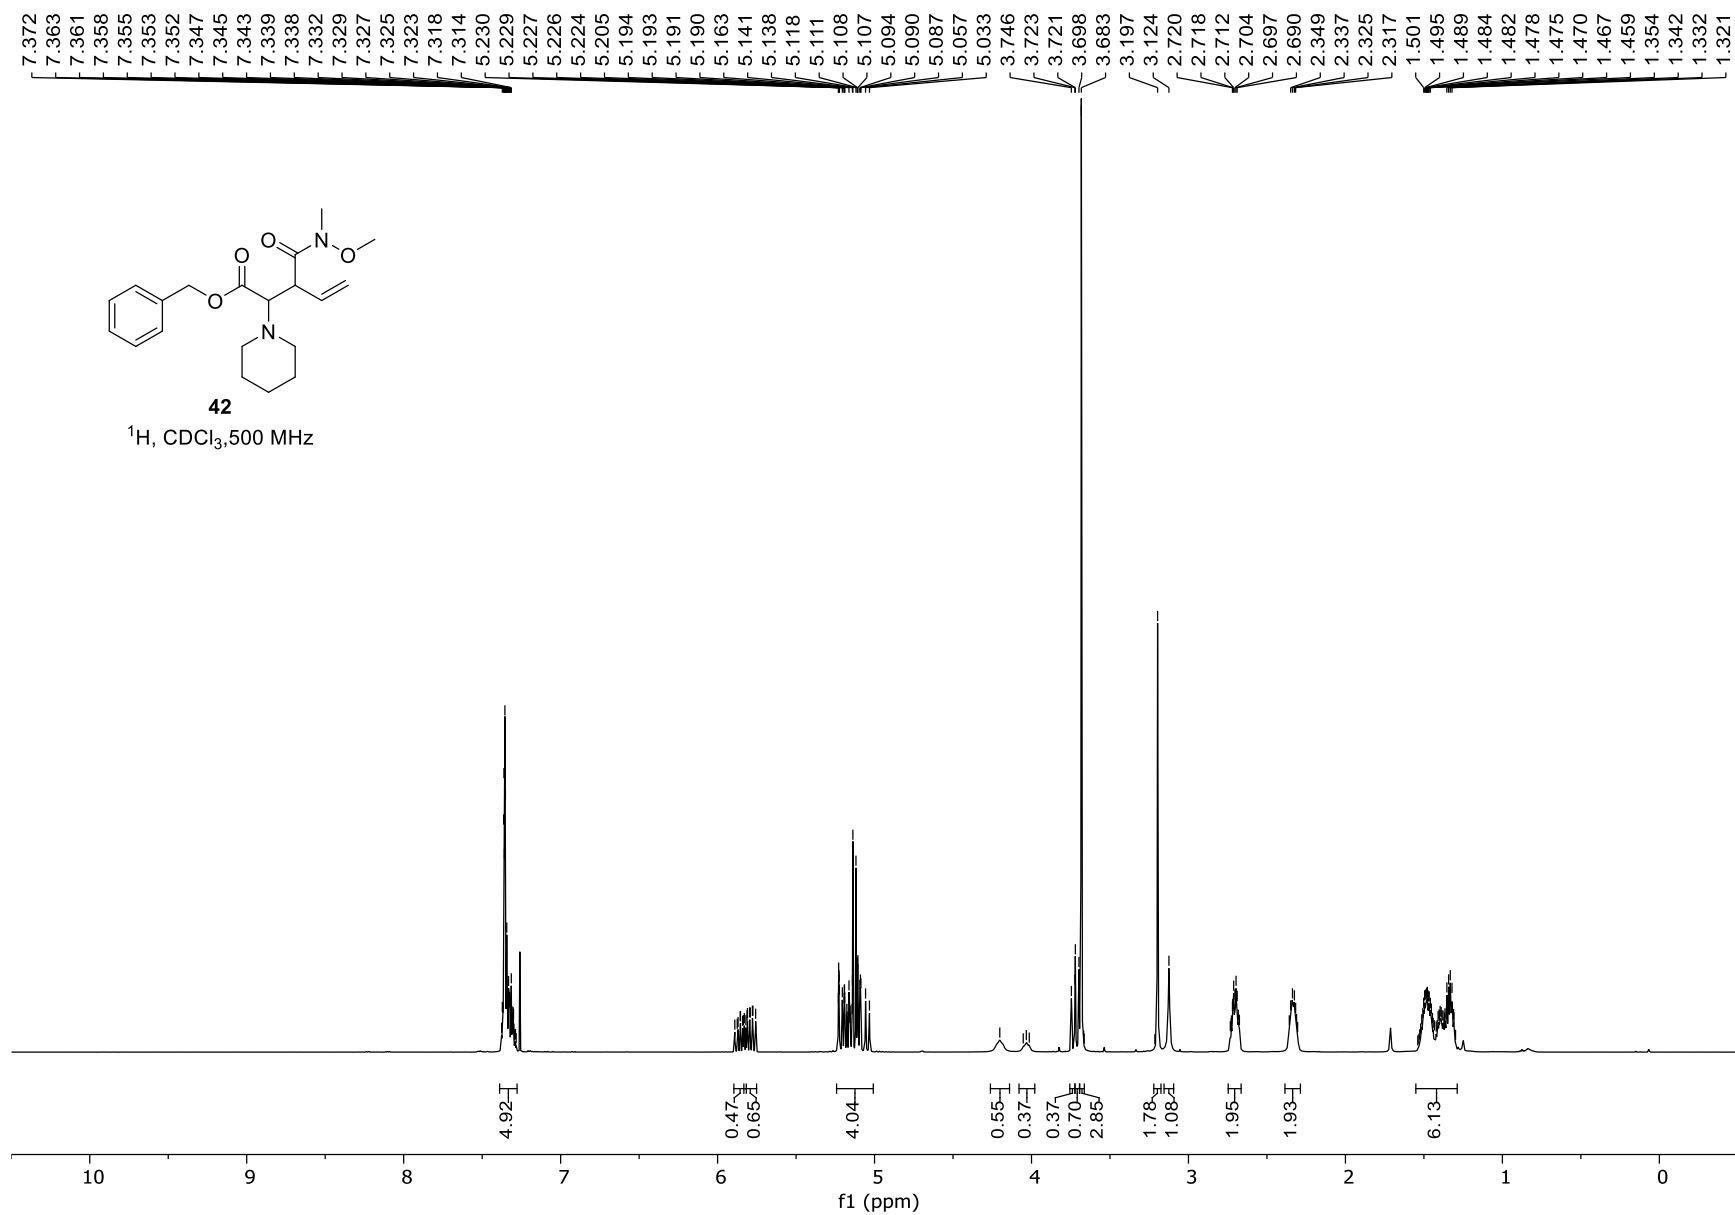

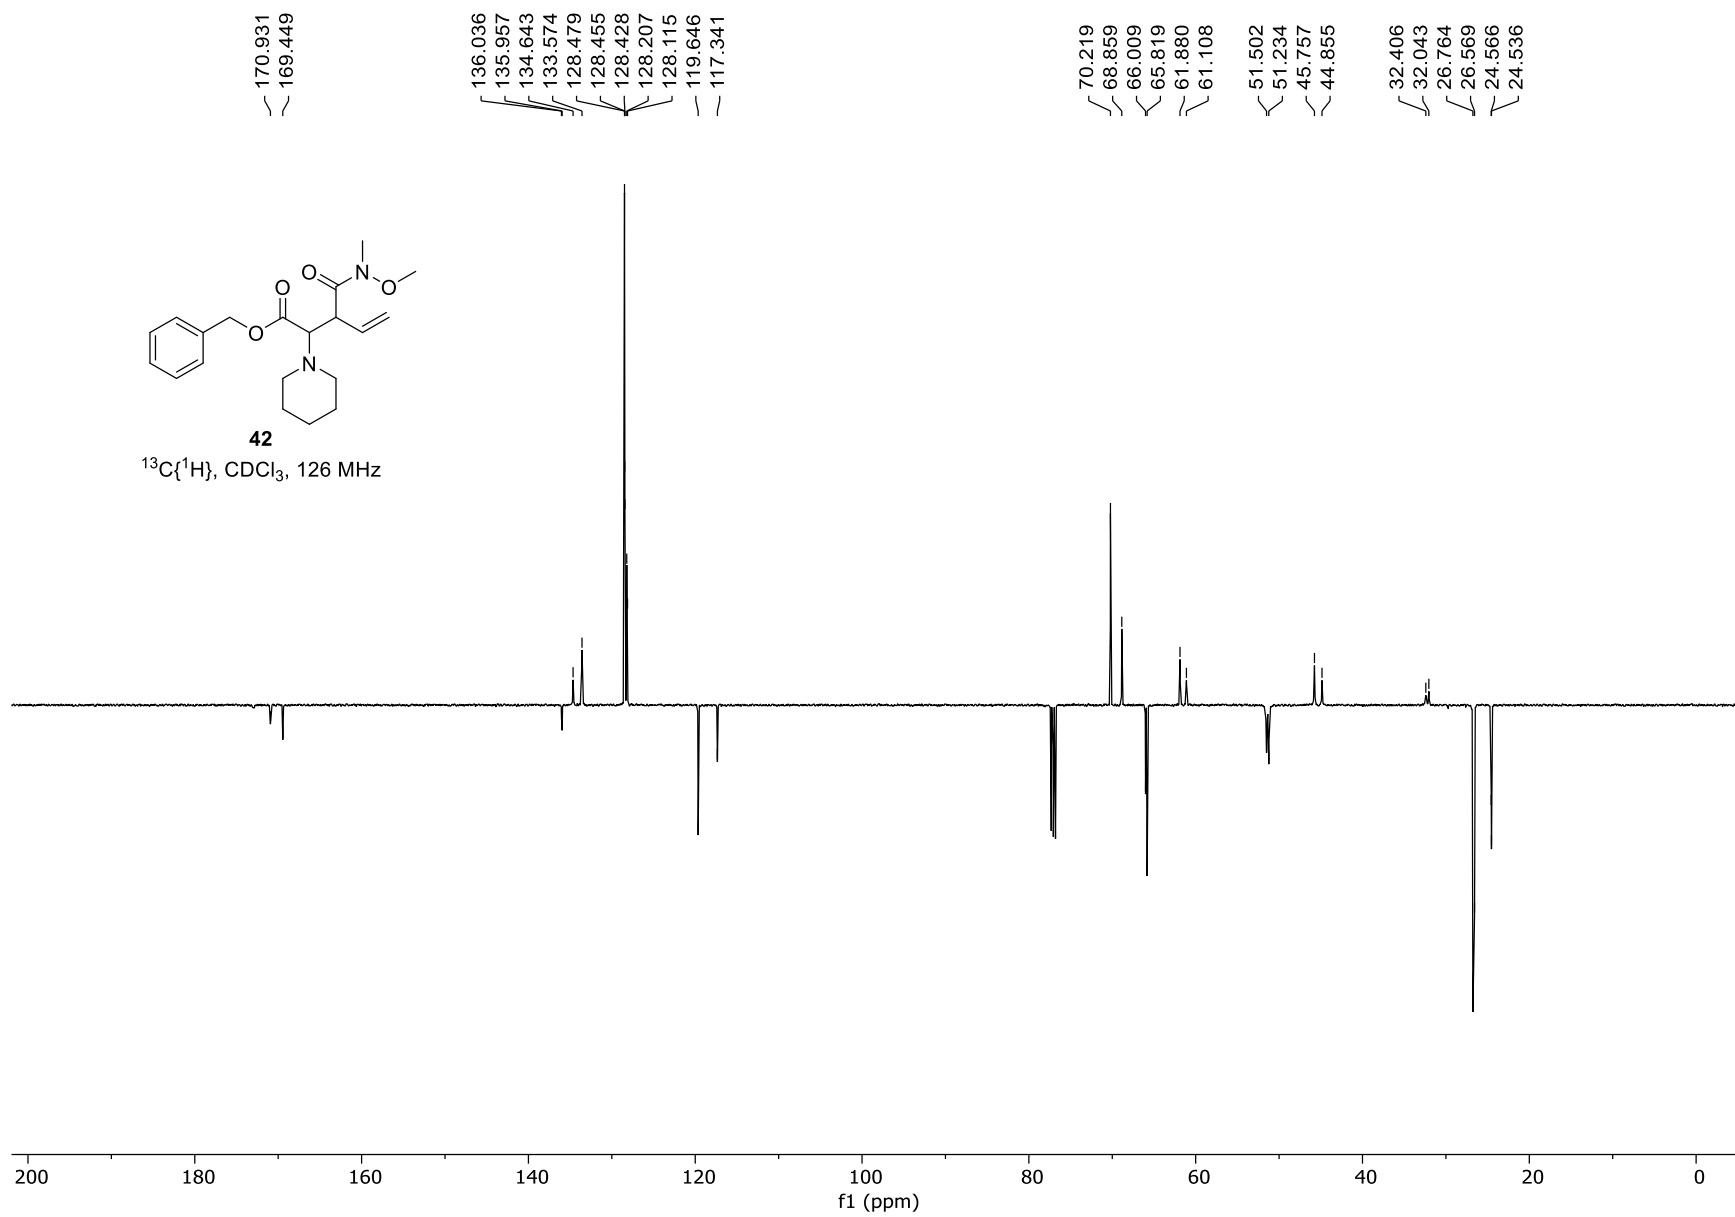

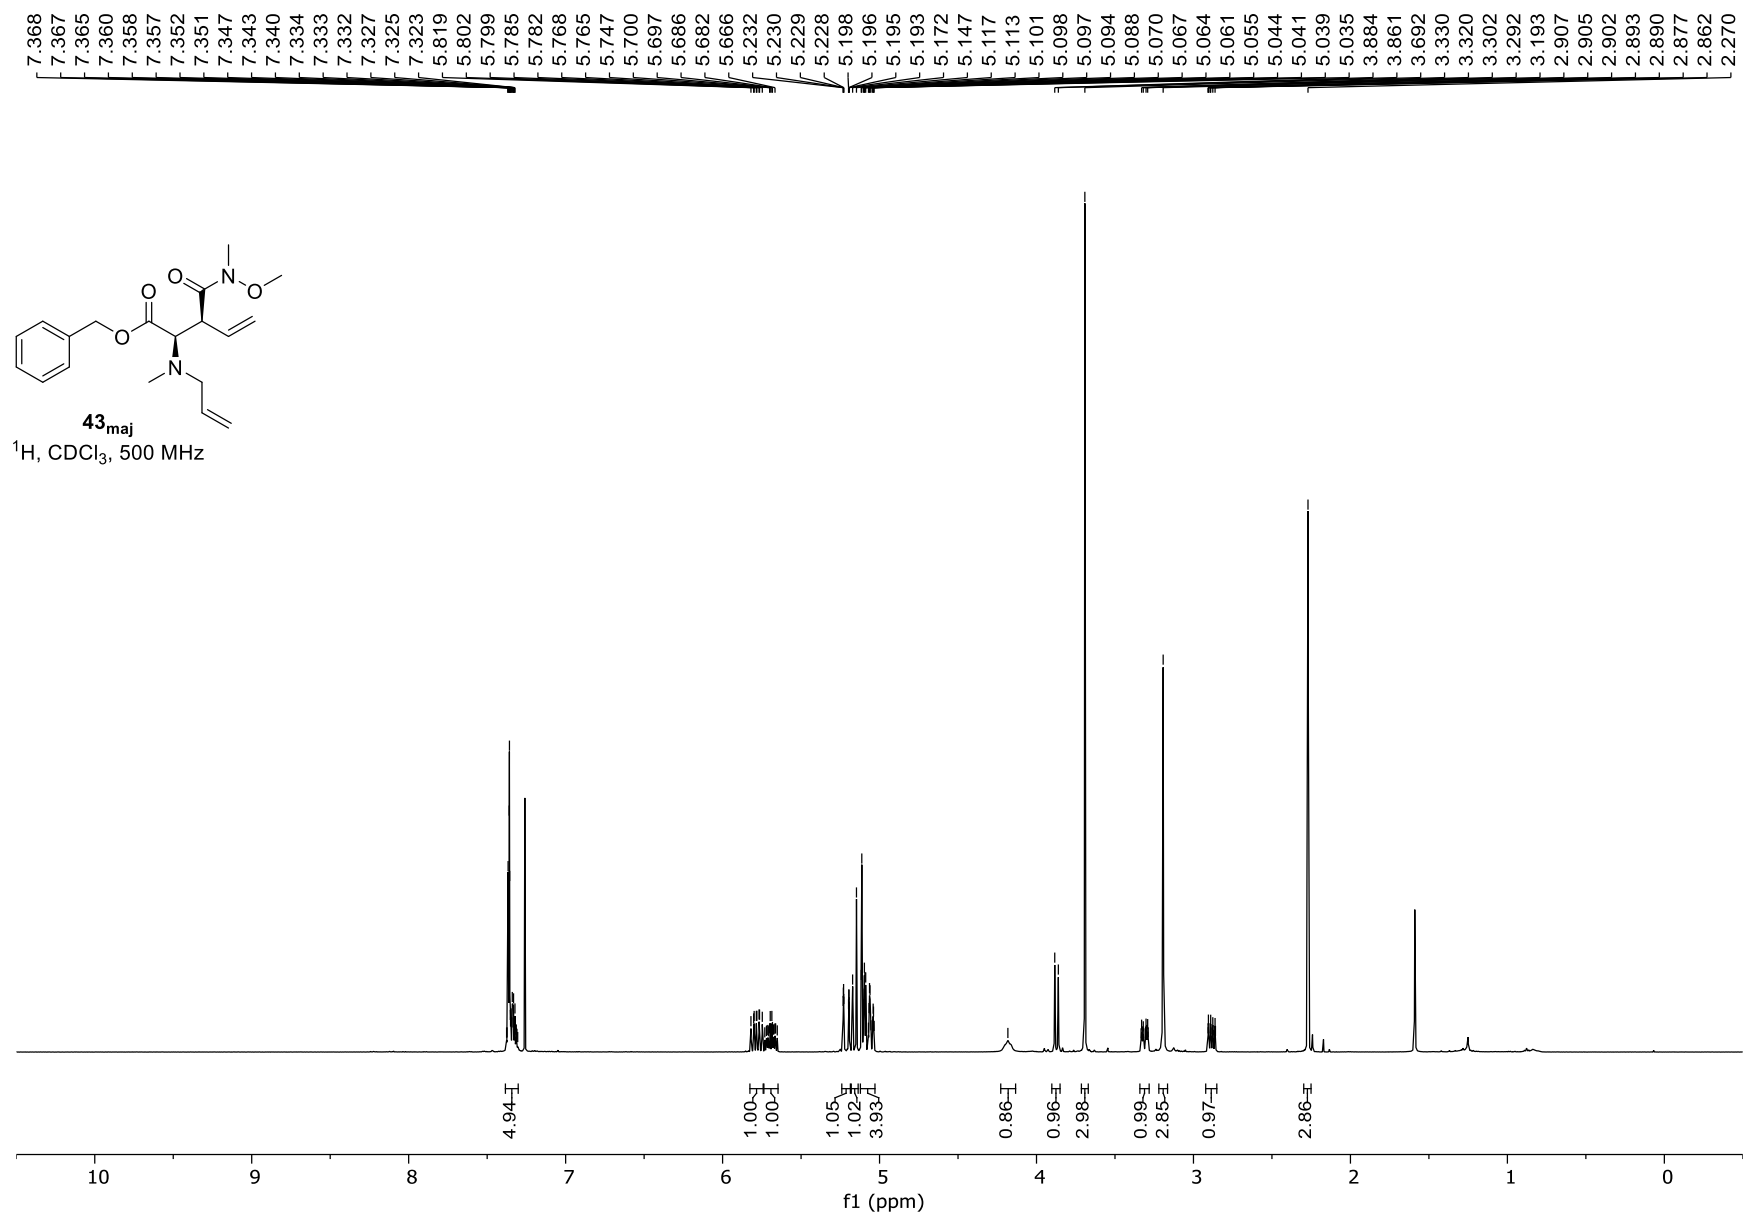

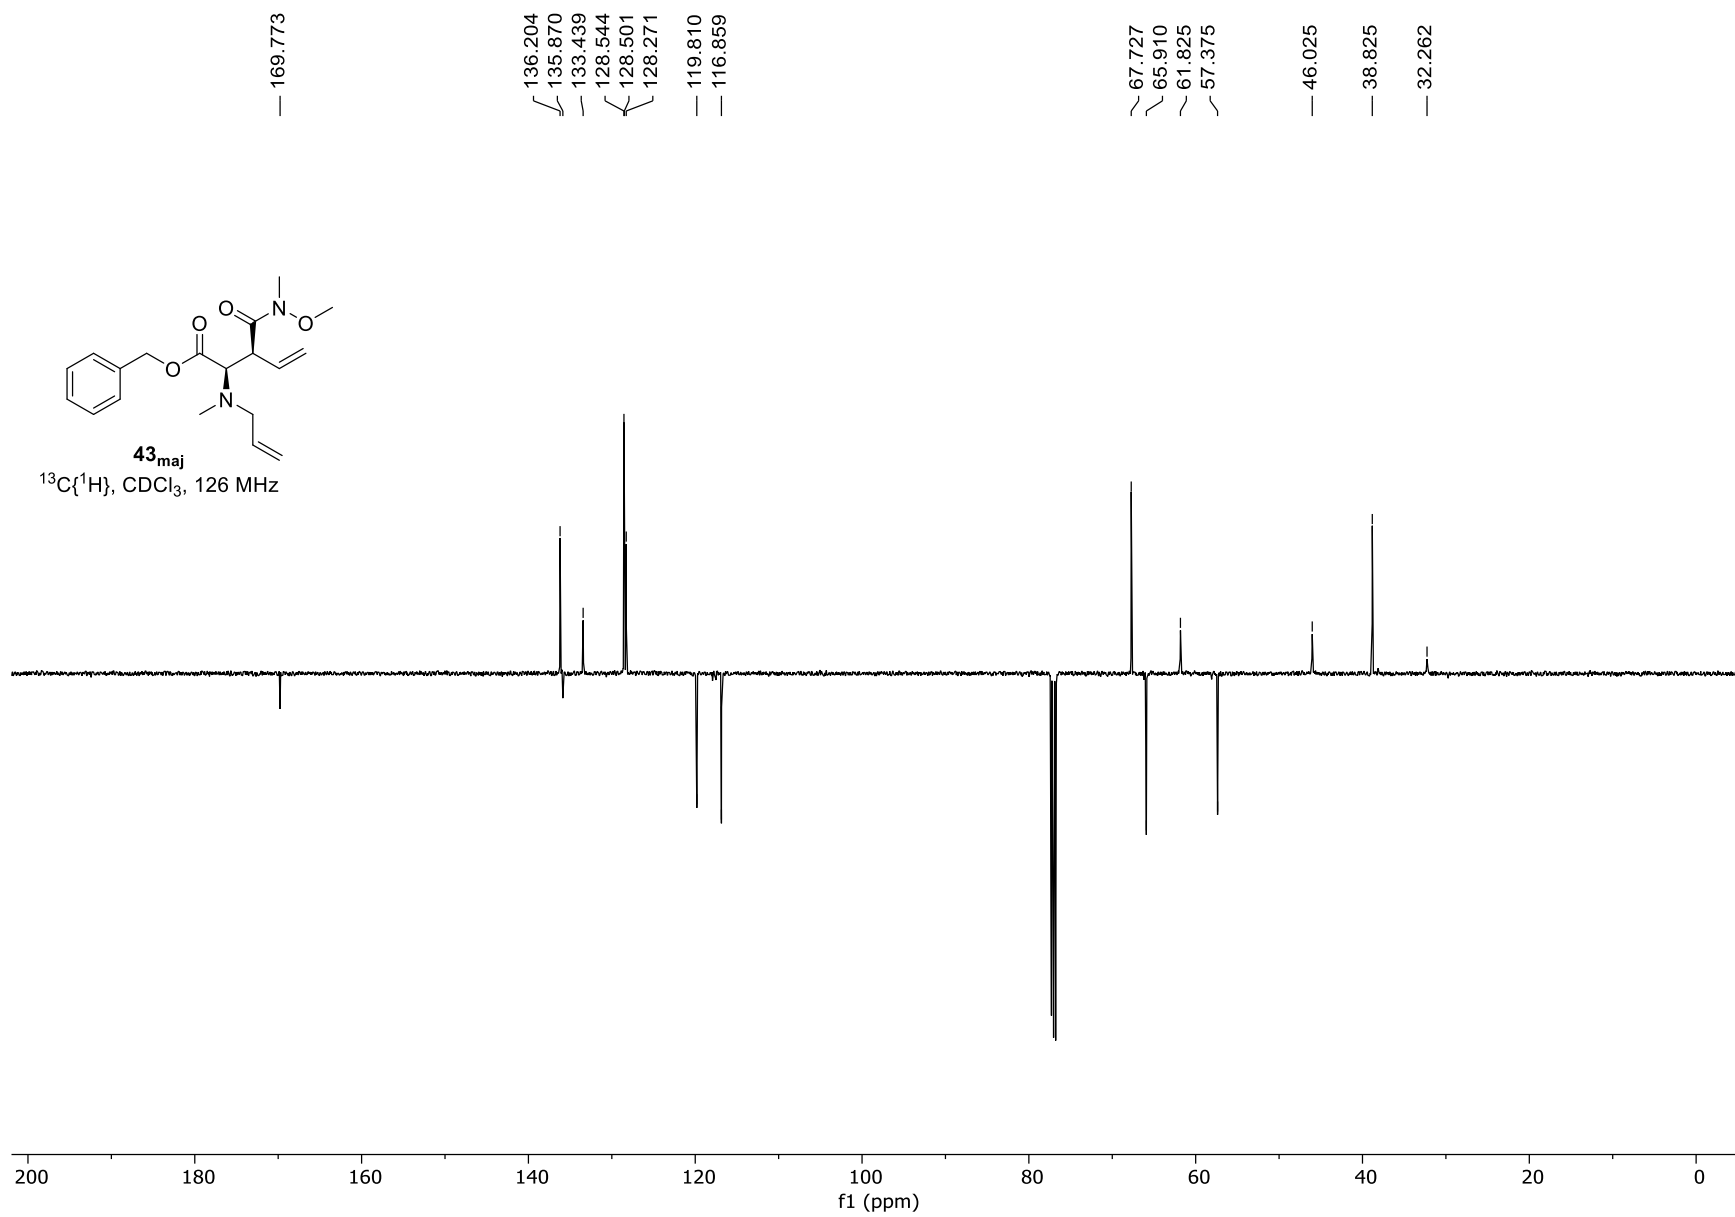

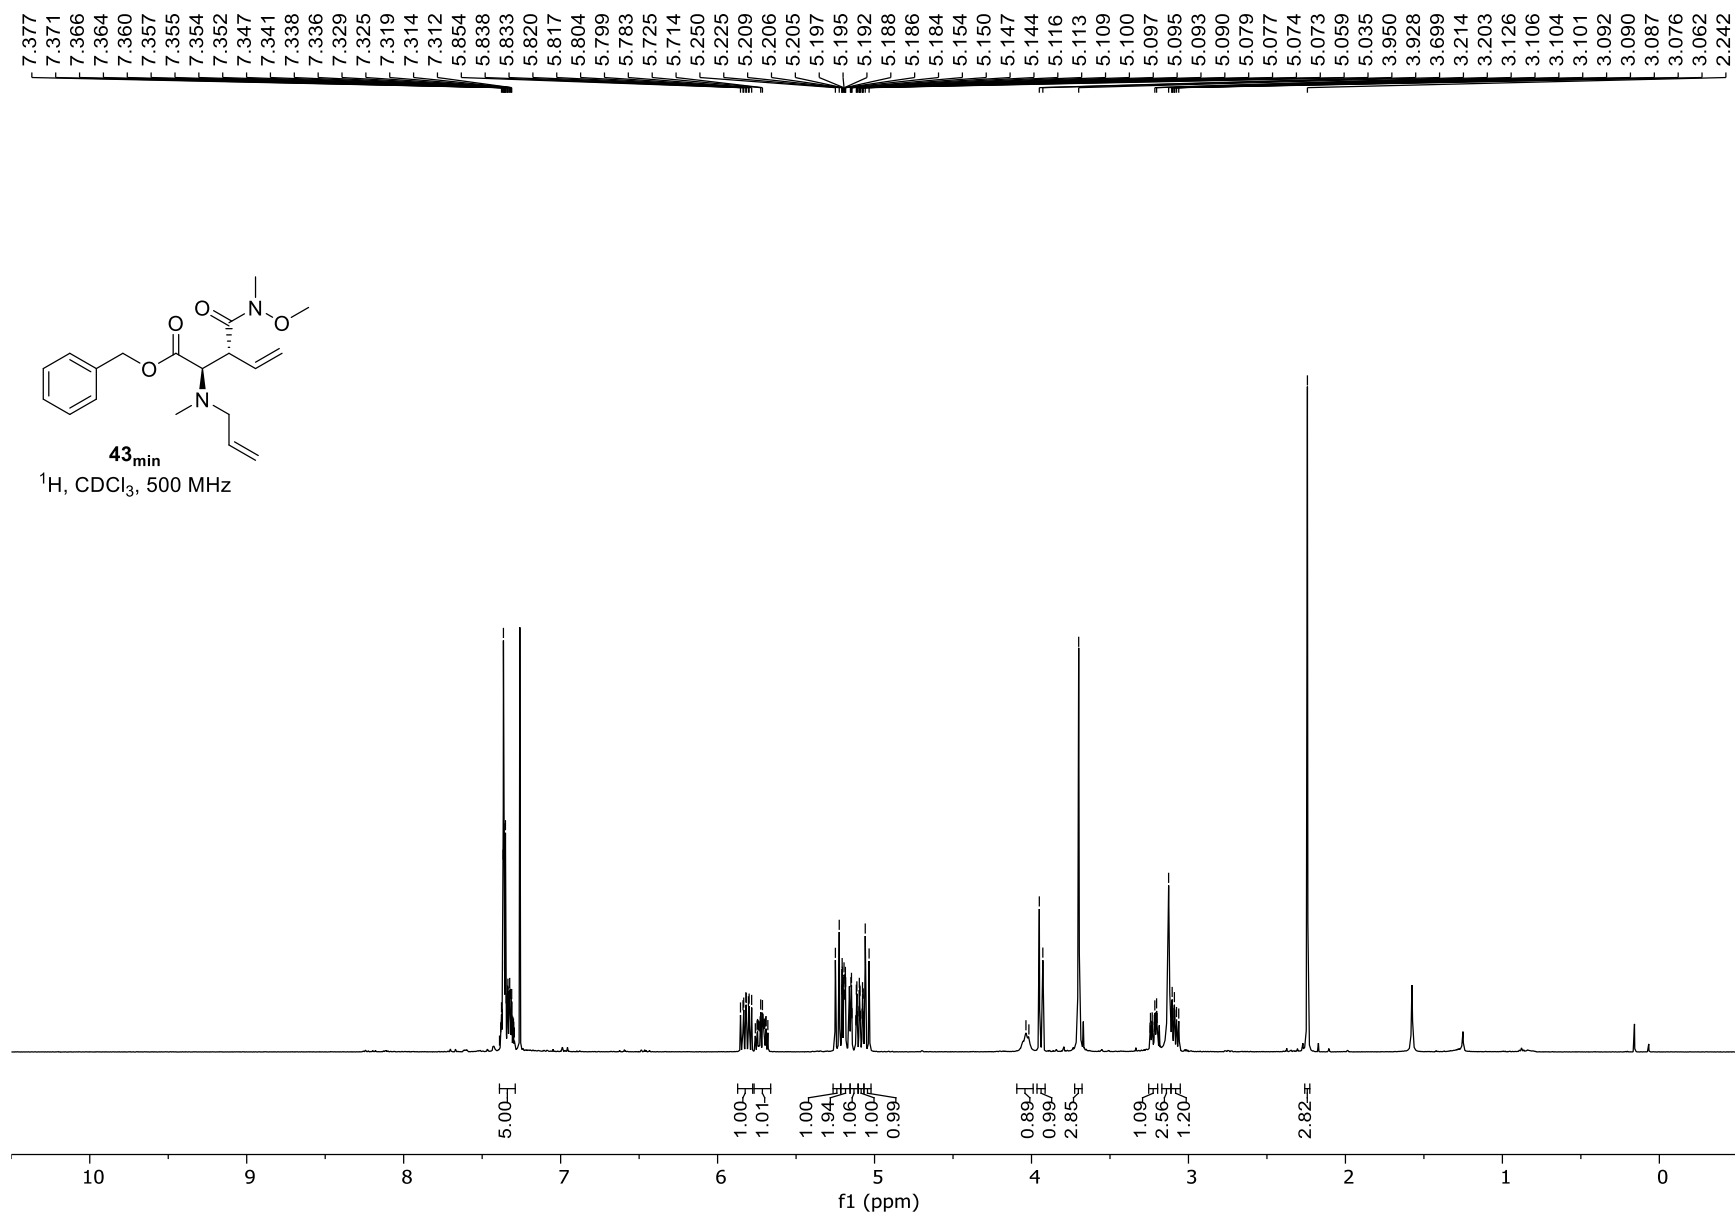



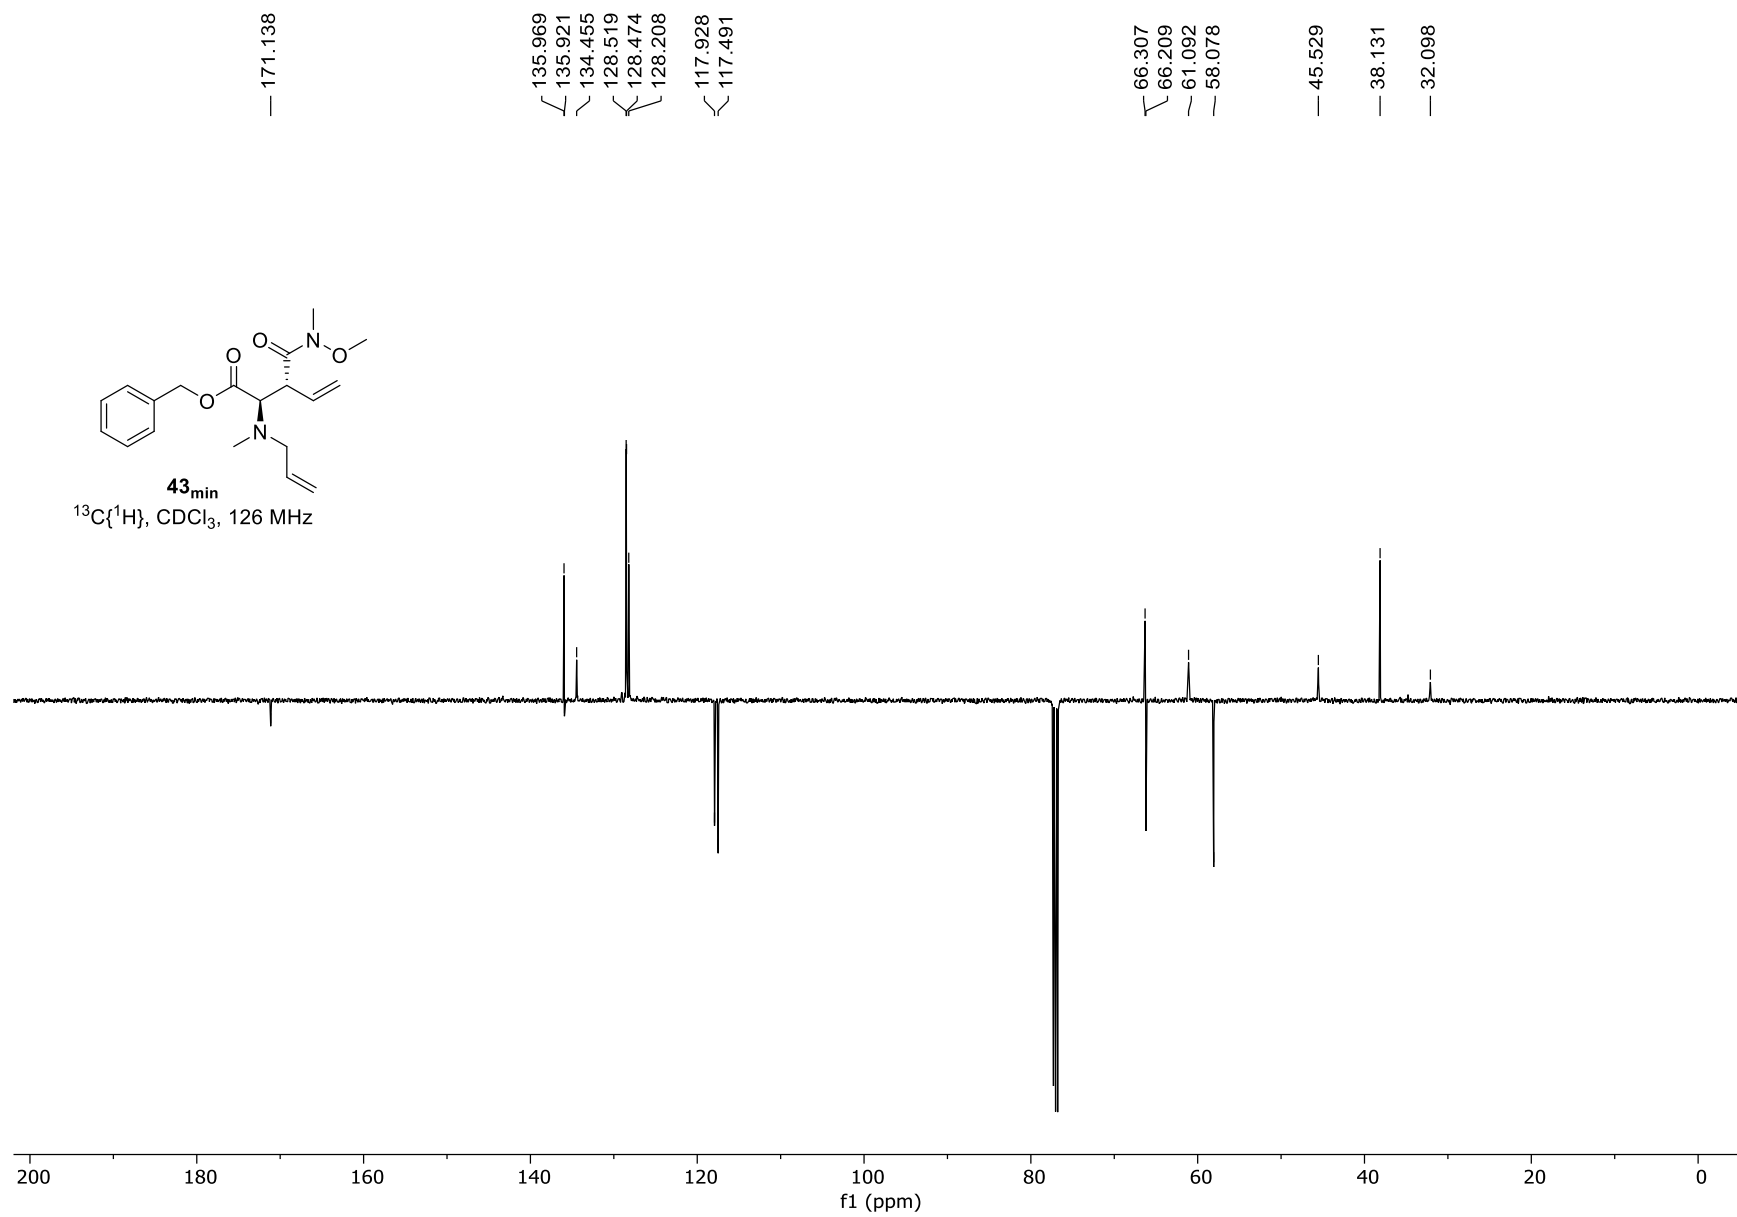

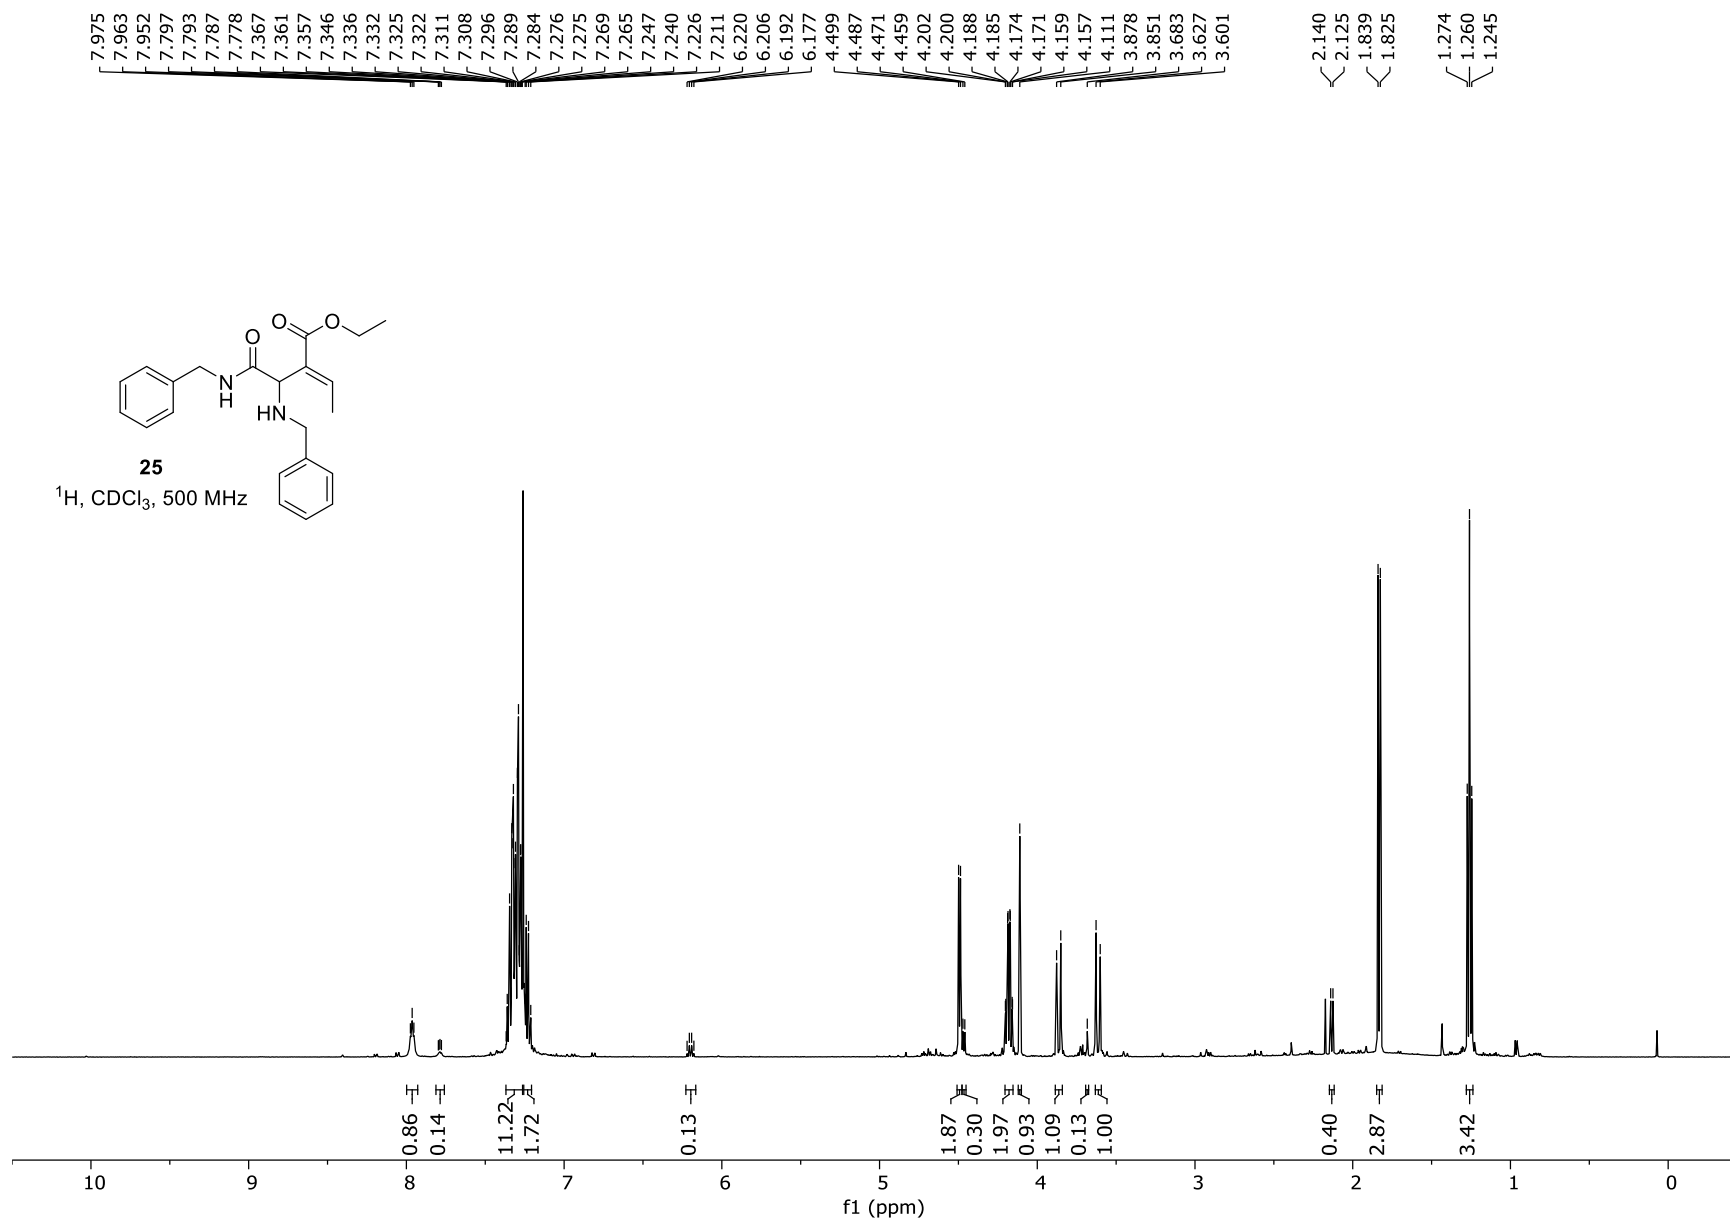

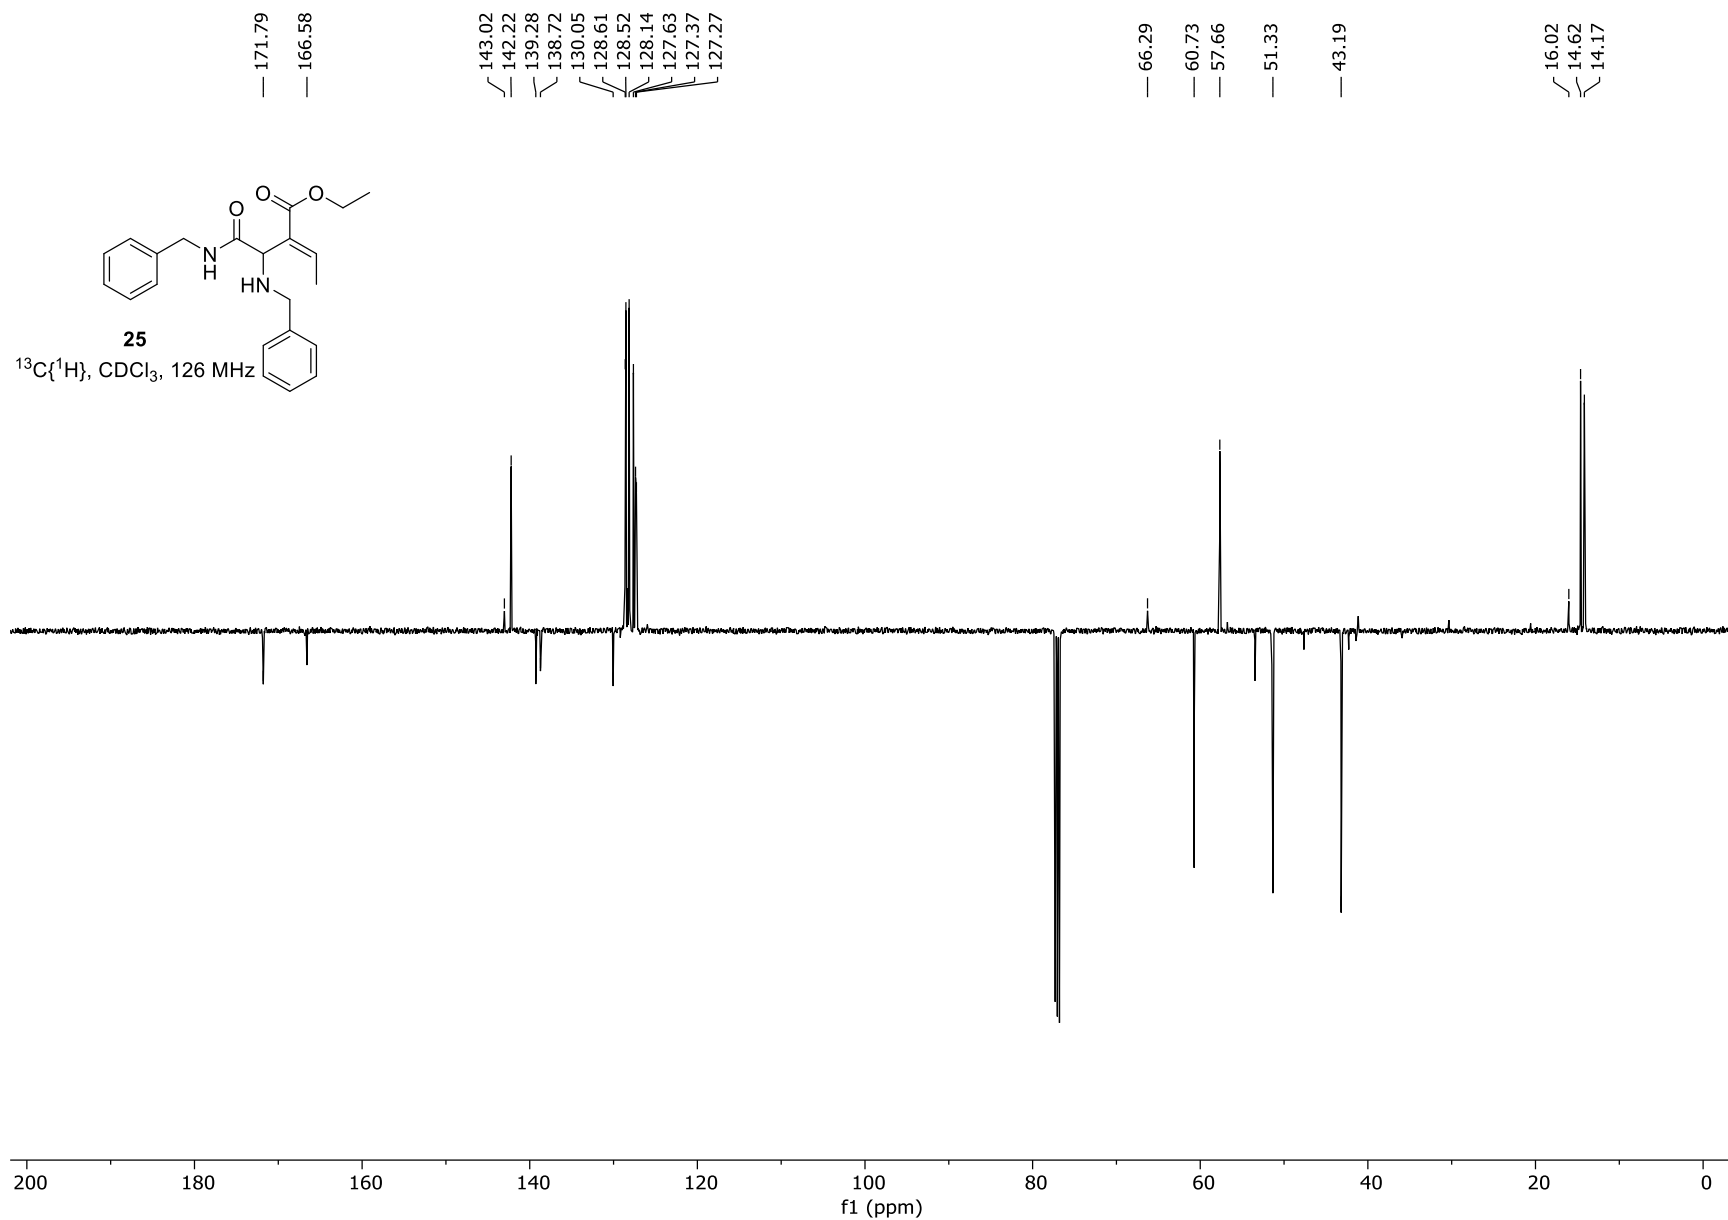

## Appendix III. HPLC traces

HPLC Data for **18** (60:40 dr): Chiralcel OD-H, (*n*-hexane : *i*PrOH 99:1, flow rate 0.5 mLmin<sup>-1</sup>, 254 nm, 30 °C) *major diastereoisomer*: t<sub>R</sub> (2*S*,3*R*): 26.7 min, t<sub>R</sub> (2*R*,3*S*): 29.5 min, 10:90 er; *minor diastereoisomer*: t<sub>R</sub> (2*R*,3*R*): 25.0 min, t<sub>R</sub> (2*S*,3*S*): 41.7 min, 70:30 er.

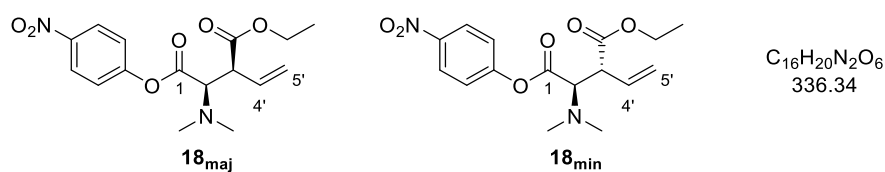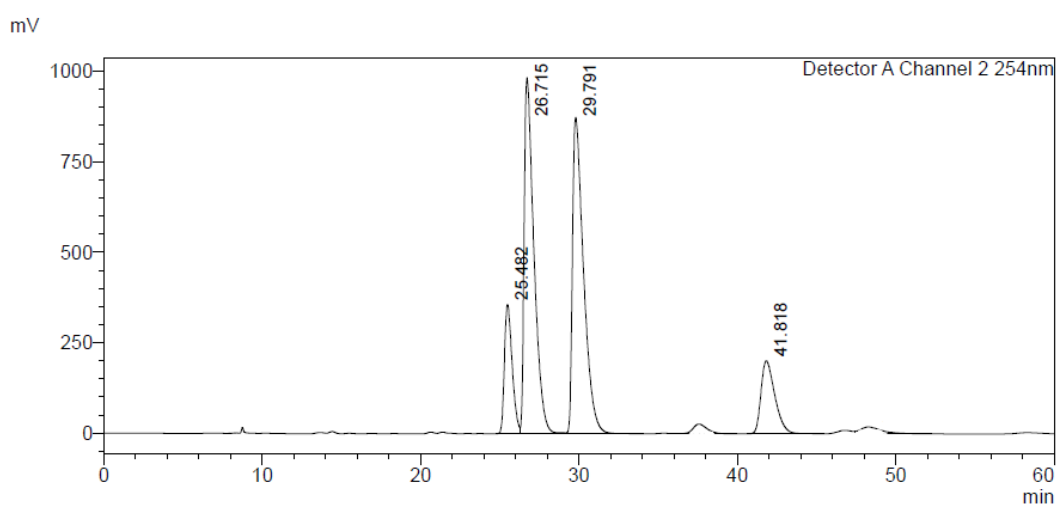

### <Peak Table>

Detector A Channel 2 254 nm

| Peak# | Ret. Time | Area%  |
|-------|-----------|--------|
| 1     | 25.482    | 11.098 |
| 2     | 26.715    | 38.744 |
| 3     | 29.791    | 38.926 |
| 4     | 41.818    | 11.232 |
| Total |           | 100    |

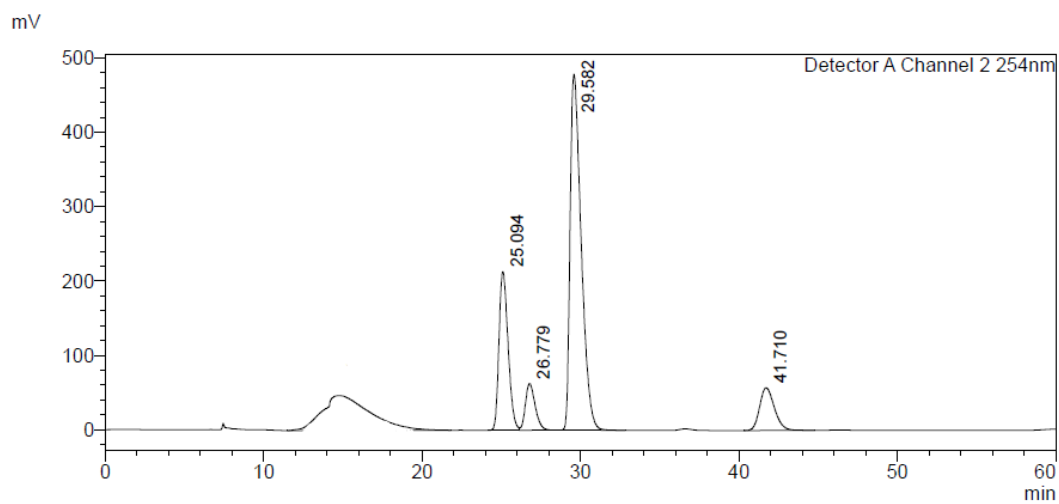

**<Peak Table>**

Detector A Channel 2 254 nm

| Peak# | Ret. Time | Area%  |
|-------|-----------|--------|
| 1     | 25.094    | 22.269 |
| 2     | 26.779    | 6.989  |
| 3     | 29.582    | 61.022 |
| 4     | 41.710    | 9.720  |
| Total |           | 100    |

HPLC Data for **27<sub>maj</sub>**: Chiralcel OD-H, (*n*-hexane : *i*PrOH 95:5, flow rate 1.0 mLmin<sup>-1</sup>, 211 nm, 40 °C) *t<sub>R</sub>* (2*S*,3*R*) 14.7 min, *t<sub>R</sub>* (2*R*,3*S*) 19.5 min, 9:91 er.

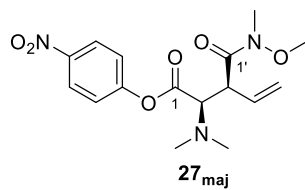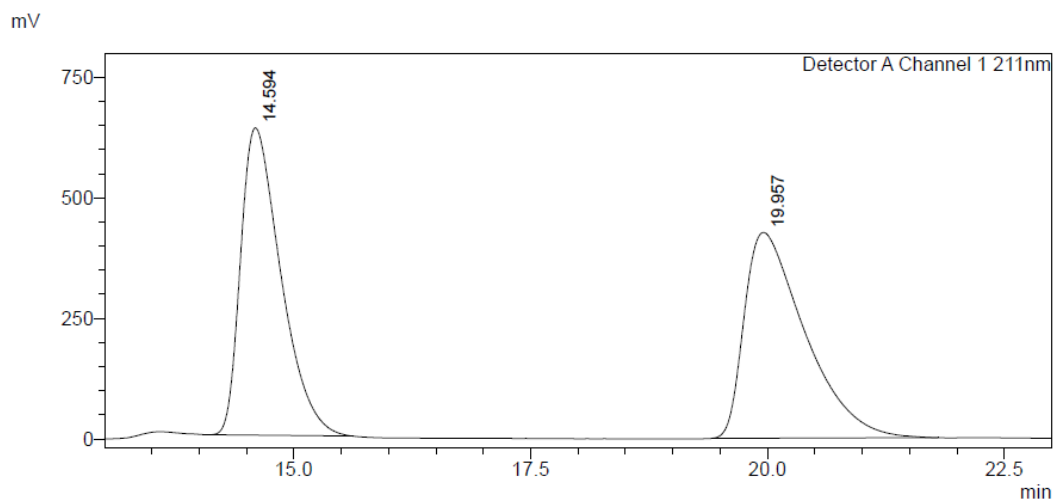

**<Peak Table>**

| Detector A Channel 1 211nm |           |         |
|----------------------------|-----------|---------|
| Peak#                      | Ret. Time | Area%   |
| 1                          | 14.594    | 49.792  |
| 2                          | 19.957    | 50.208  |
| Total                      |           | 100.000 |

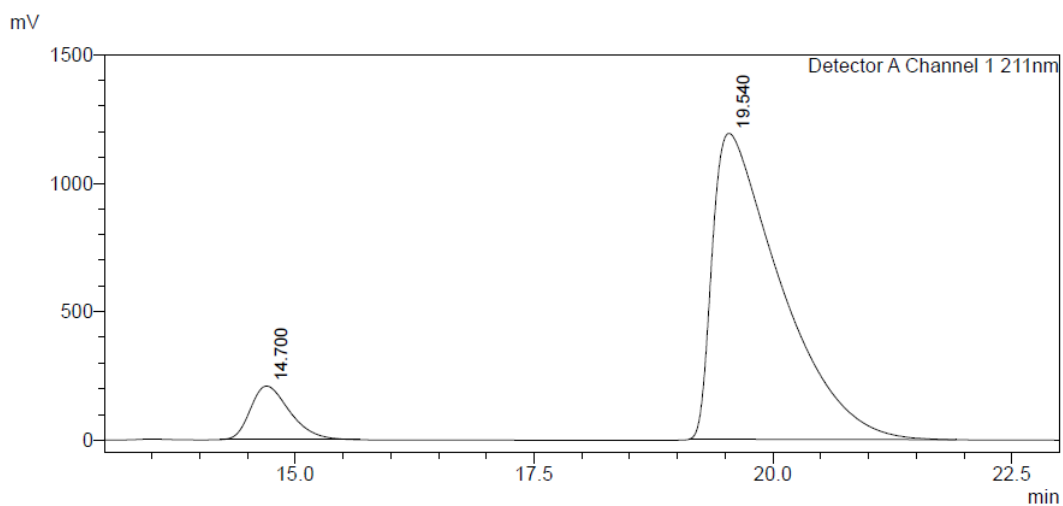

**<Peak Table>**

| Detector A Channel 1 211nm |           |         |
|----------------------------|-----------|---------|
| Peak#                      | Ret. Time | Area%   |
| 1                          | 14.700    | 9.189   |
| 2                          | 19.540    | 90.811  |
| Total                      |           | 100.000 |

HPLC Data for **27**<sub>min</sub>: Chiralcel OD-H, (*n*-hexane : *i*PrOH 95:5, flow rate 1.0 mLmin<sup>-1</sup>, 211 nm, 40 °C) *t*<sub>R</sub> (2*R*,3*R*): 10.1 min, *t*<sub>R</sub> (2*S*,3*S*): 13.3 min, 83:17 er.

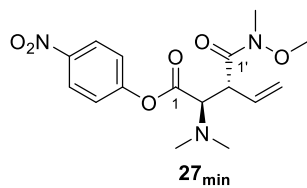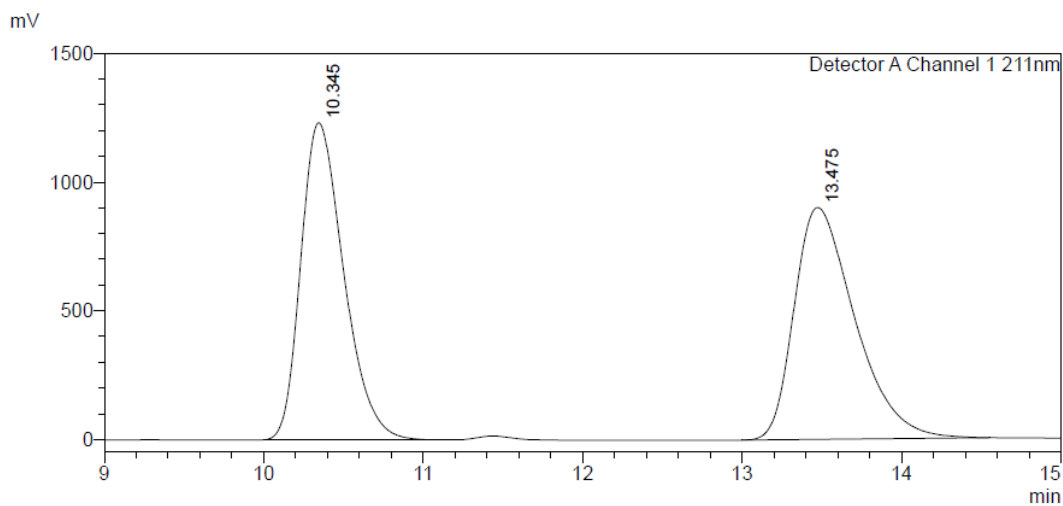

#### <Peak Table>

| Detector A Channel 1 211nm |           |         |
|----------------------------|-----------|---------|
| Peak#                      | Ret. Time | Area%   |
| 1                          | 10.345    | 49.133  |
| 2                          | 13.475    | 50.867  |
| Total                      |           | 100.000 |

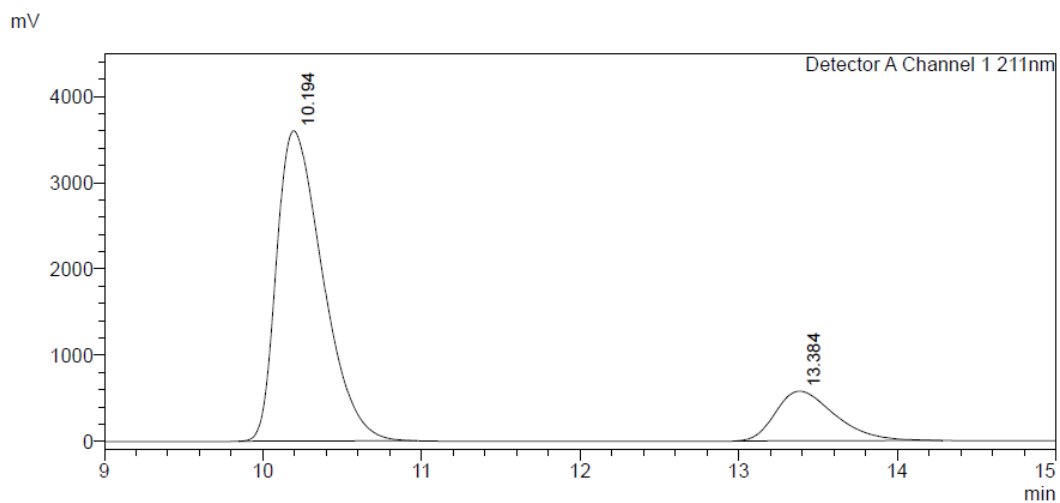

#### <Peak Table>

| Detector A Channel 1 211nm |           |         |
|----------------------------|-----------|---------|
| Peak#                      | Ret. Time | Area%   |
| 1                          | 10.194    | 82.951  |
| 2                          | 13.384    | 17.049  |
| Total                      |           | 100.000 |

HPLC Data for **28<sub>maj</sub>**: Chiralpak ID, (*n*-hexane : *i*PrOH 88:12, flow rate 1.5 mLmin<sup>-1</sup>, 211 nm, 40 °C) *t<sub>R</sub>* (2*S*,1'*R*): 20.0 min, *t<sub>R</sub>* (2*R*,1'*S*) 13.9 min, 90:10 er.

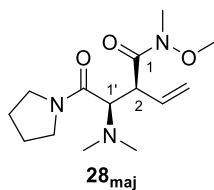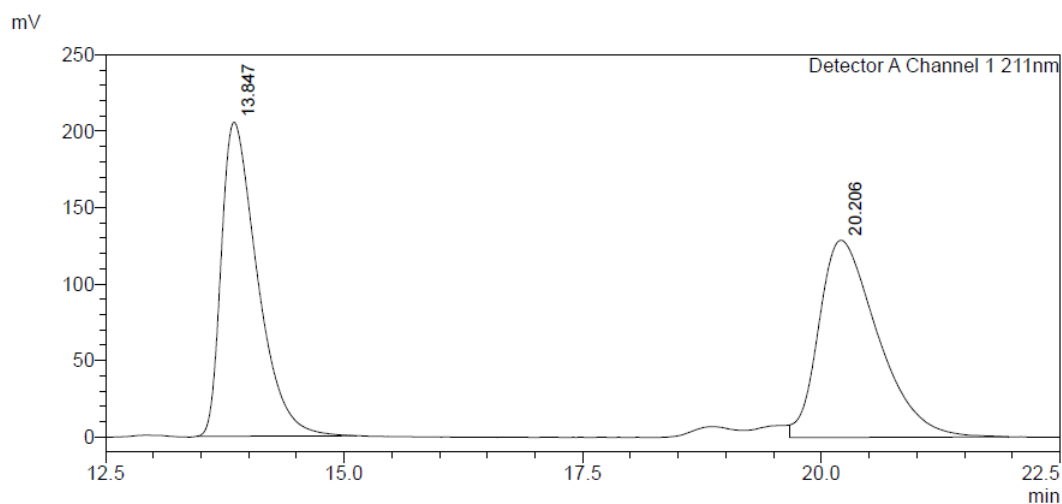

#### <Peak Table>

| Detector A Channel 1 211nm |           |         |
|----------------------------|-----------|---------|
| Peak#                      | Ret. Time | Area%   |
| 1                          | 13.847    | 49.250  |
| 2                          | 20.206    | 50.750  |
| Total                      |           | 100.000 |

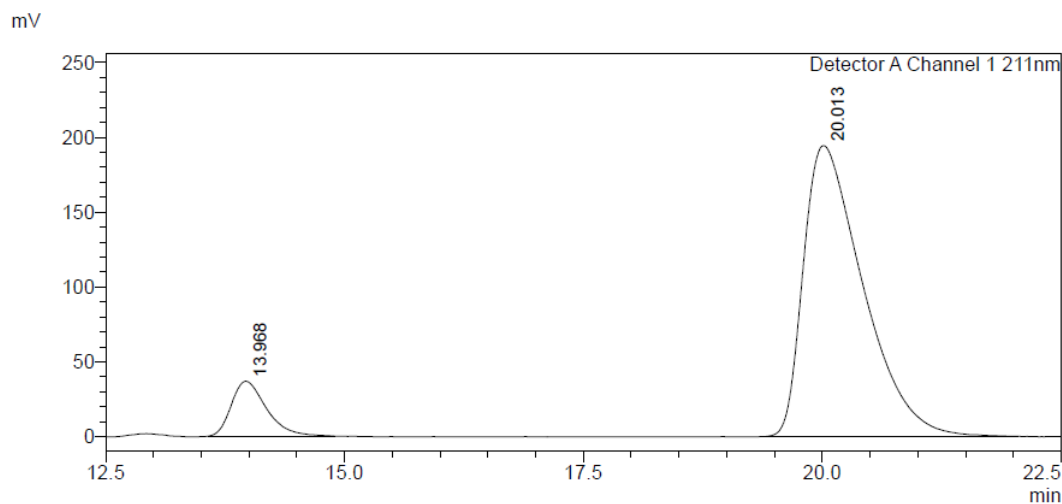

#### <Peak Table>

| Detector A Channel 1 211nm |           |         |
|----------------------------|-----------|---------|
| Peak#                      | Ret. Time | Area%   |
| 1                          | 13.968    | 10.001  |
| 2                          | 20.013    | 89.999  |
| Total                      |           | 100.000 |



HPLC Data for **28<sub>min</sub>**: Chiralpak ID, (*n*-hexane : *i*PrOH 88:12, flow rate 1.5 mLmin<sup>-1</sup>, 211 nm, 40 °C) *t<sub>R</sub>* (major) 12.5 min, *t<sub>R</sub>* (minor) 6.2 min, 84:16 er.

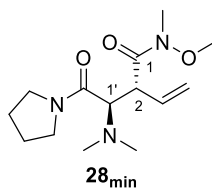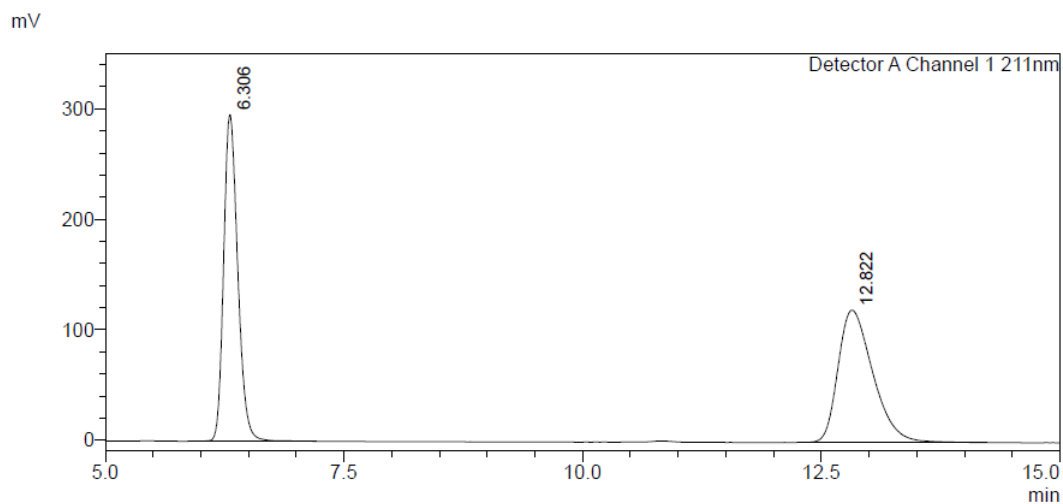

#### <Peak Table>

| Detector A Channel 1 211nm |           |         |
|----------------------------|-----------|---------|
| Peak#                      | Ret. Time | Area%   |
| 1                          | 6.306     | 50.079  |
| 2                          | 12.822    | 49.921  |
| Total                      |           | 100.000 |

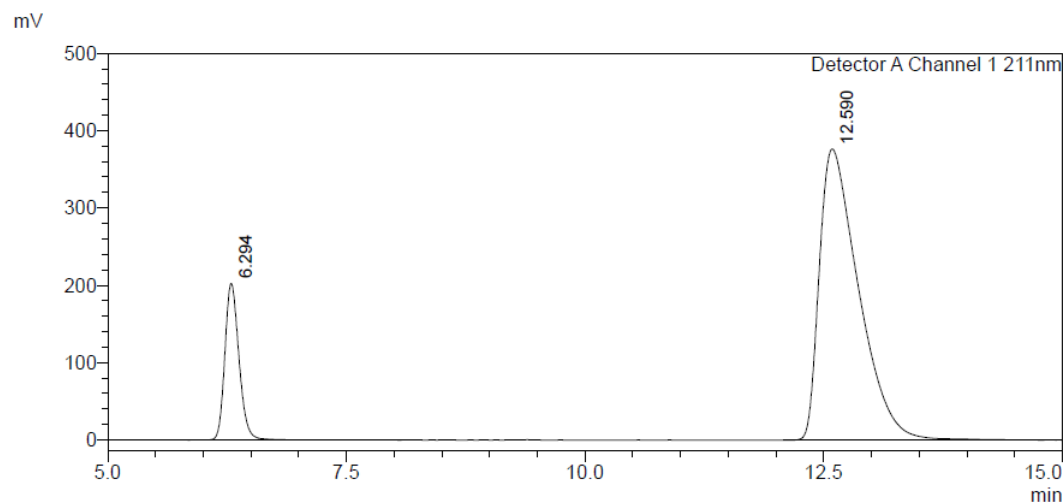

#### <Peak Table>

| Detector A Channel 1 211nm |           |         |
|----------------------------|-----------|---------|
| Peak#                      | Ret. Time | Area%   |
| 1                          | 6.294     | 16.209  |
| 2                          | 12.590    | 83.791  |
| Total                      |           | 100.000 |

HPLC Data for **29<sub>maj</sub>**: Chiralcel OD-H (95:5 hexane : *i*PrOH, flow rate 1 mlmin<sup>-1</sup>, 211 nm, 40 °C) *t<sub>R</sub>* (2*R*,3*S*): 8.3 min, *t<sub>R</sub>* (2*S*,3*R*): 9.8 min, 87:13 er.

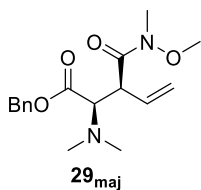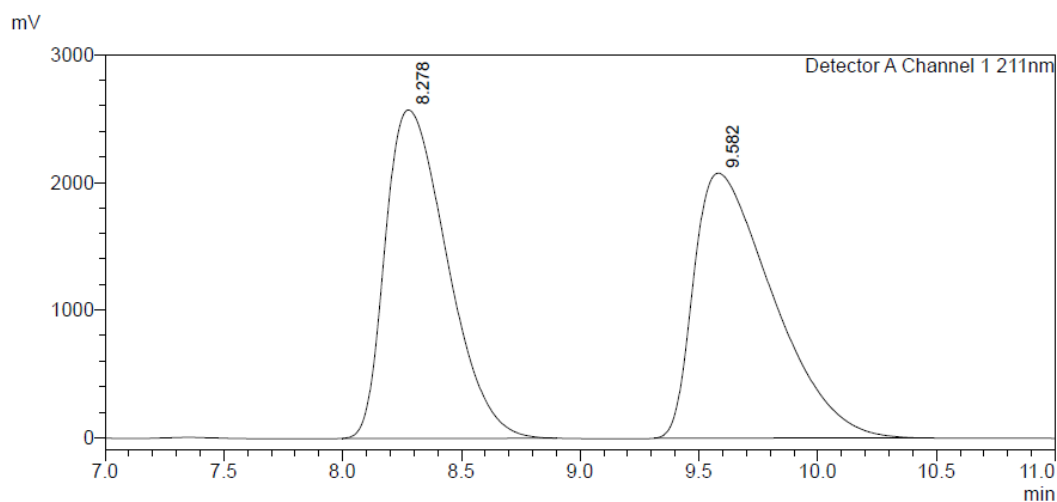

**<Peak Table>**

| Detector A Channel 1 211nm |           |         |
|----------------------------|-----------|---------|
| Peak#                      | Ret. Time | Area%   |
| 1                          | 8.278     | 49.210  |
| 2                          | 9.582     | 50.790  |
| Total                      |           | 100.000 |

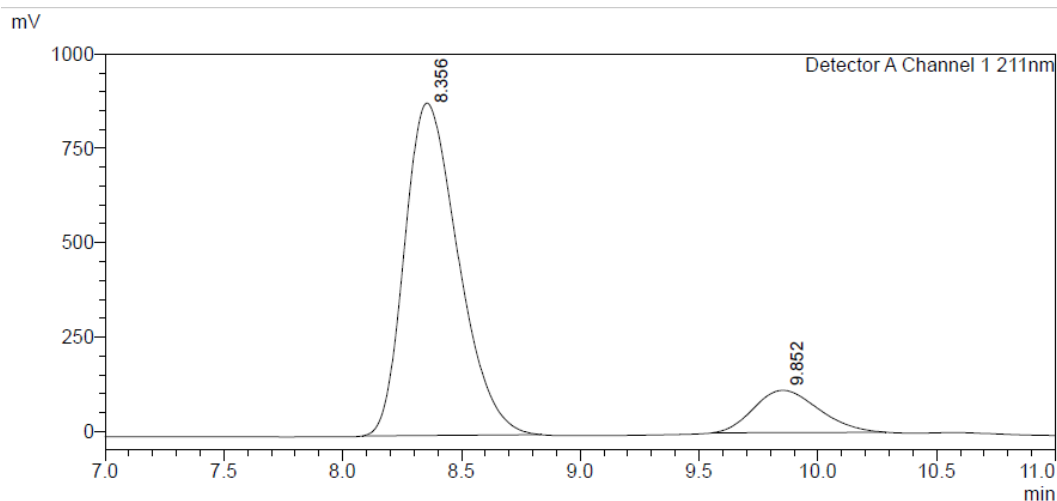

**<Peak Table>**

| Detector A Channel 1 211nm |           |         |
|----------------------------|-----------|---------|
| Peak#                      | Ret. Time | Area%   |
| 1                          | 8.356     | 86.597  |
| 2                          | 9.852     | 13.403  |
| Total                      |           | 100.000 |

HPLC Data for **29<sub>min</sub>**: Chiralcel OD-H (99:1 hexane : *i*PrOH, flow rate 1 mlmin<sup>-1</sup>, 211 nm, 40 °C) *t<sub>R</sub>* (2*R*,3*R*): 16.3 min, *t<sub>R</sub>* (2*S*,3*S*): 19.0 min, 77:23 er.

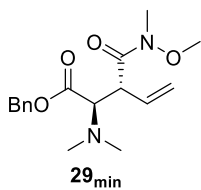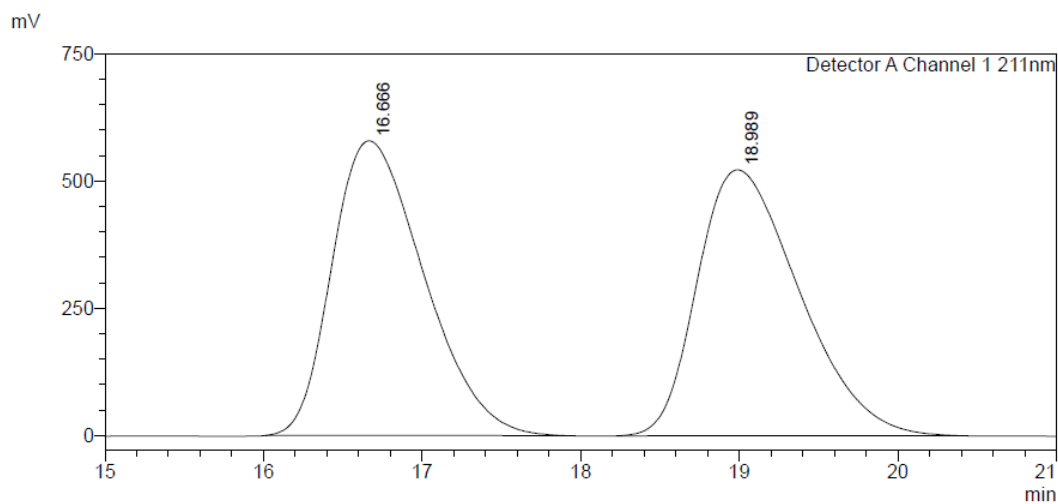

**<Peak Table>**

| Detector A Channel 1 211nm |           |         |
|----------------------------|-----------|---------|
| Peak#                      | Ret. Time | Area%   |
| 1                          | 16.666    | 49.940  |
| 2                          | 18.989    | 50.060  |
| Total                      |           | 100.000 |

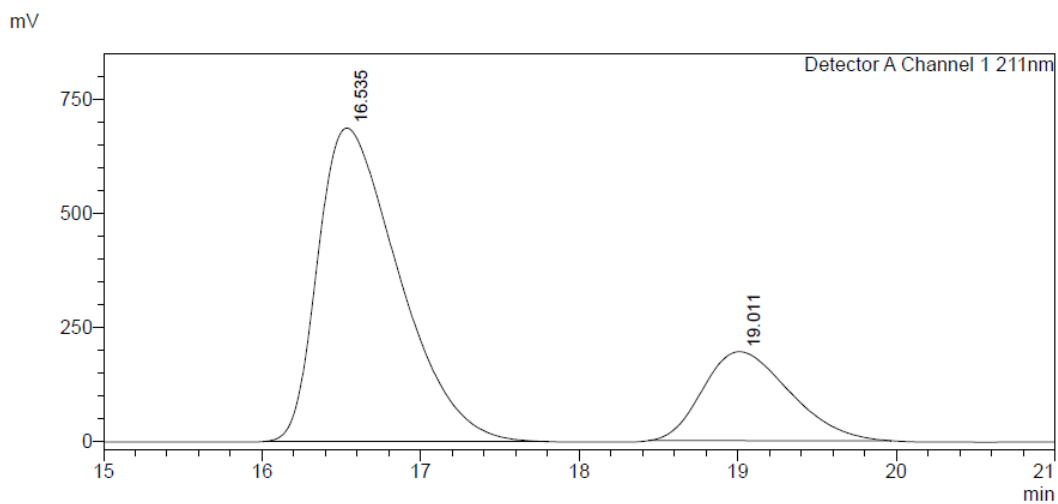

**<Peak Table>**

| Detector A Channel 1 211nm |           |         |
|----------------------------|-----------|---------|
| Peak#                      | Ret. Time | Area%   |
| 1                          | 16.535    | 76.652  |
| 2                          | 19.011    | 23.348  |
| Total                      |           | 100.000 |

HPLC Data for **38<sub>maj</sub>**: Chiralpak AD-H (98.2:1.8 hexane : *i*PrOH, flow rate 1 mlmin<sup>-1</sup>, 211 nm, 30 °C) *t<sub>R</sub>* (2*R*,3*S*): 26.8 min, *t<sub>R</sub>* (2*S*,3*R*): 31.4 min, 66:34 er.

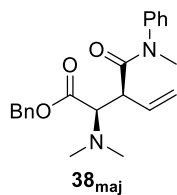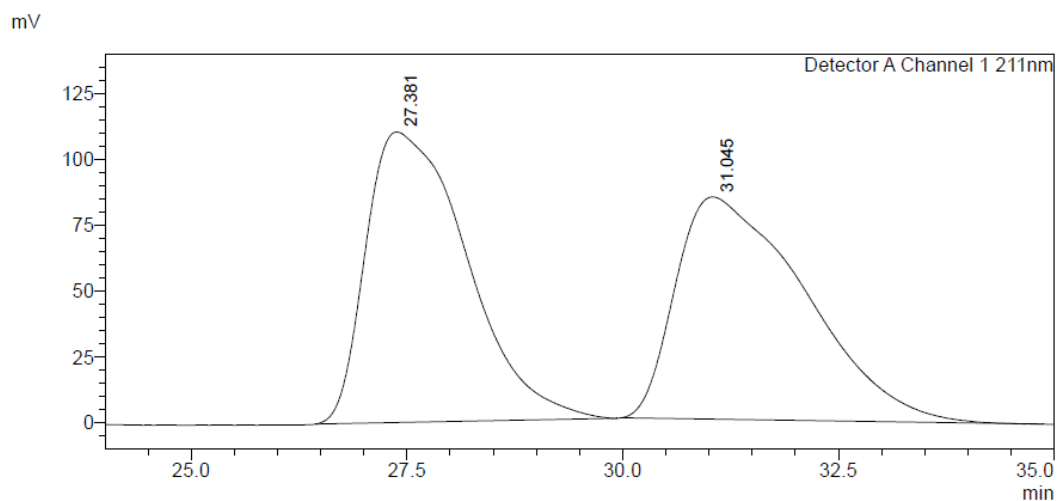

#### <Peak Table>

| Detector A Channel 1 211nm |           |         |
|----------------------------|-----------|---------|
| Peak#                      | Ret. Time | Area%   |
| 1                          | 27.381    | 50.451  |
| 2                          | 31.045    | 49.549  |
| Total                      |           | 100.000 |

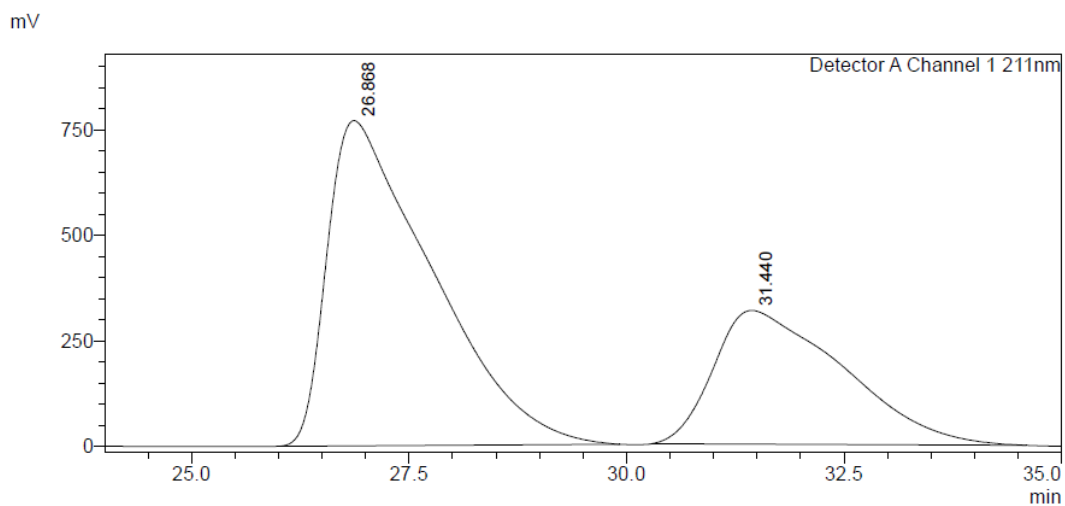

#### <Peak Table>

| Detector A Channel 1 211nm |           |         |
|----------------------------|-----------|---------|
| Peak#                      | Ret. Time | Area%   |
| 1                          | 26.868    | 66.289  |
| 2                          | 31.440    | 33.711  |
| Total                      |           | 100.000 |

HPLC Data for **38<sub>min</sub>**: Chiralcel OD-H (99.5:0.5 hexane : *i*PrOH, flow rate 1 mlmin<sup>-1</sup>, 211 nm, 30 °C) *t<sub>R</sub>* (2*R*,3*R*): 33.1 min, *t<sub>R</sub>* (2*S*,3*S*): 38.4 min, 67:33 er.

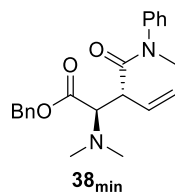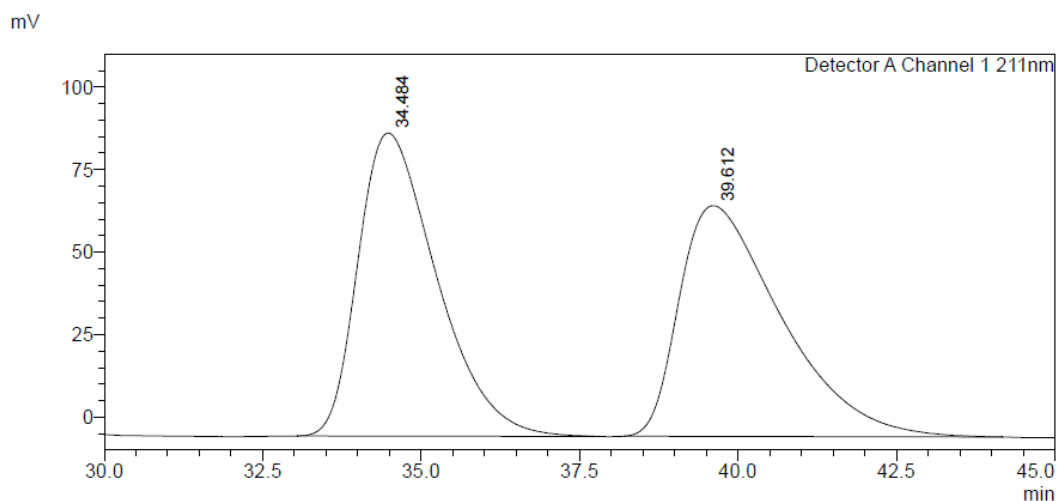

#### <Peak Table>

| Detector A Channel 1 211nm |           |         |
|----------------------------|-----------|---------|
| Peak#                      | Ret. Time | Area%   |
| 1                          | 34.484    | 50.306  |
| 2                          | 39.612    | 49.694  |
| Total                      |           | 100.000 |

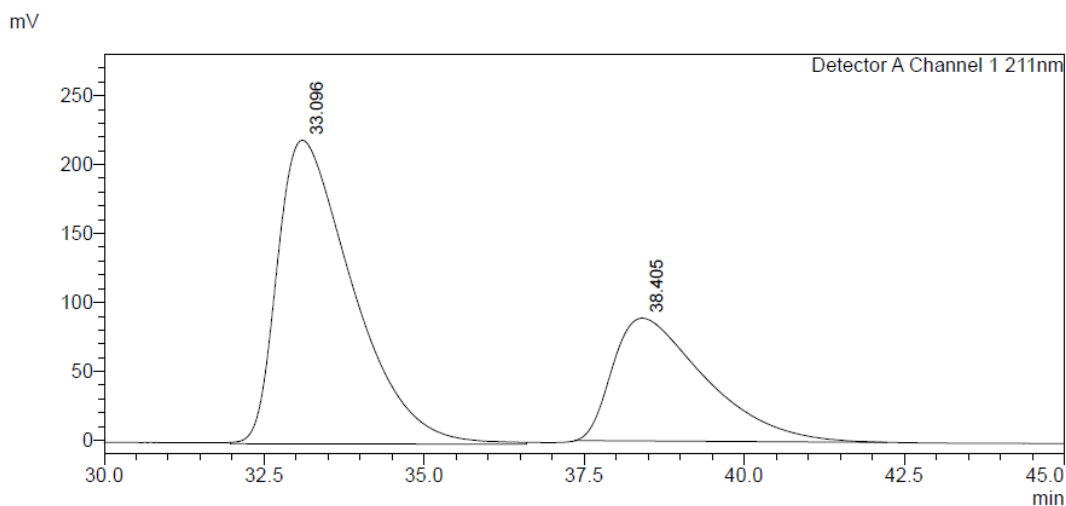

#### <Peak Table>

| Detector A Channel 1 211nm |           |         |
|----------------------------|-----------|---------|
| Peak#                      | Ret. Time | Area%   |
| 1                          | 33.096    | 66.817  |
| 2                          | 38.405    | 33.183  |
| Total                      |           | 100.000 |

HPLC Data for **39<sub>maj</sub>**: Chiralcel OD-H (98:2 hexane : *i*PrOH, flow rate 1 mlmin<sup>-1</sup>, 211 nm, 40 °C) *t<sub>R</sub>* (2*R*,3*S*): 22.4 min, *t<sub>R</sub>* (2*S*,3*R*): 29.9 min, 71:29 er.

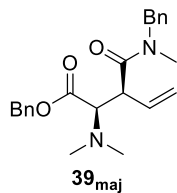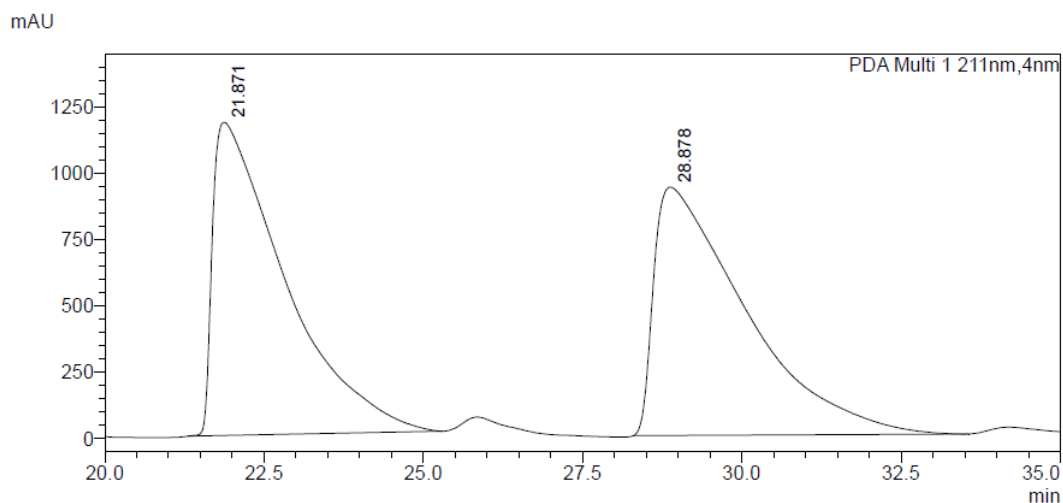

#### <Peak Table>

| PDA Ch1 211nm |           |         |
|---------------|-----------|---------|
| Peak#         | Ret. Time | Area%   |
| 1             | 21.871    | 49.800  |
| 2             | 28.878    | 50.200  |
| Total         |           | 100.000 |

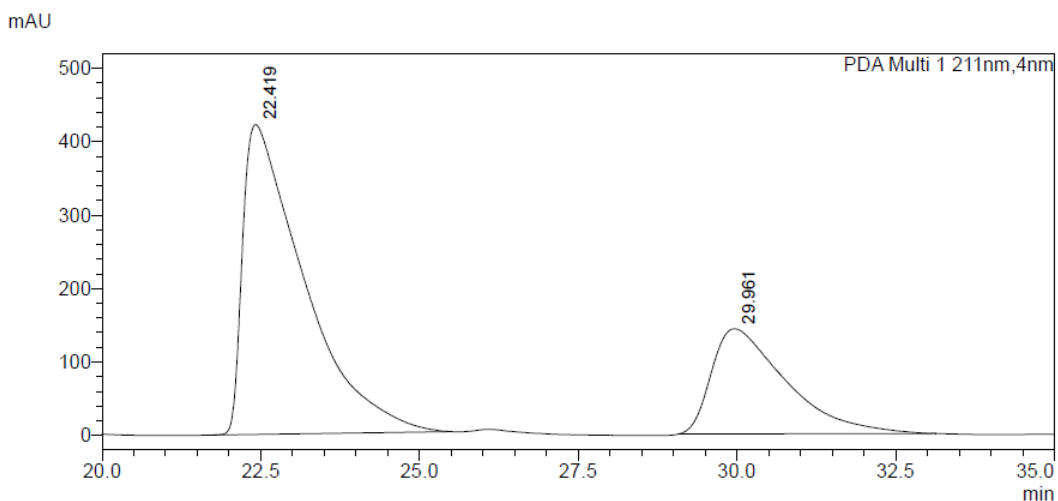

#### <Peak Table>

| PDA Ch1 211nm |           |         |
|---------------|-----------|---------|
| Peak#         | Ret. Time | Area%   |
| 1             | 22.419    | 70.837  |
| 2             | 29.961    | 29.163  |
| Total         |           | 100.000 |

HPLC Data for **39**<sub>min</sub>: Chiralcel OD-H (98:2 hexane : *i*PrOH, flow rate 1 mlmin<sup>-1</sup>, 211 nm, 40 °C) *t*<sub>R</sub> (2*R*,3*R*): 13.4 min, *t*<sub>R</sub> (2*S*,3*S*): 20.8 min, 53:47 er.

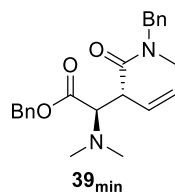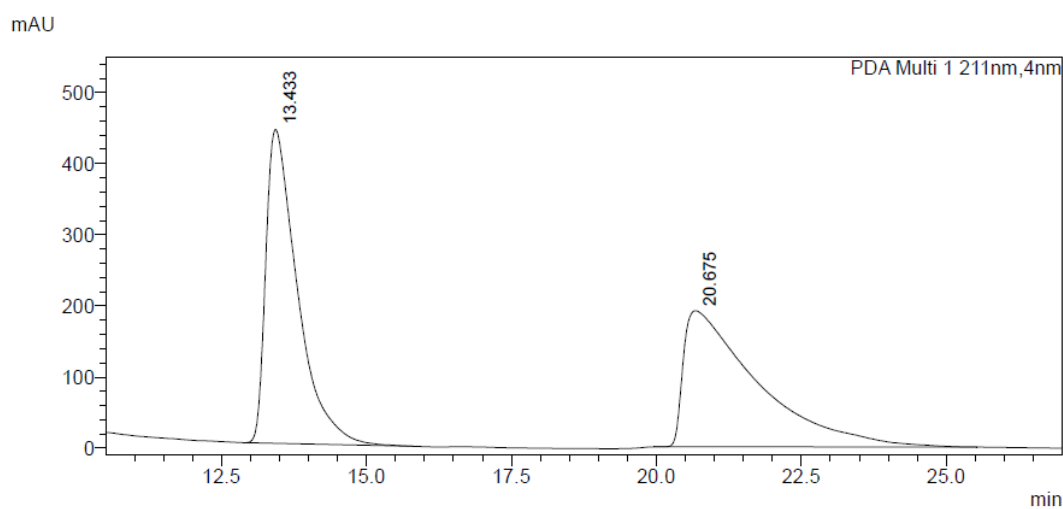

**<Peak Table>**

| PDA Ch1 211nm |           |         |
|---------------|-----------|---------|
| Peak#         | Ret. Time | Area%   |
| 1             | 13.433    | 49.612  |
| 2             | 20.675    | 50.388  |
| Total         |           | 100.000 |

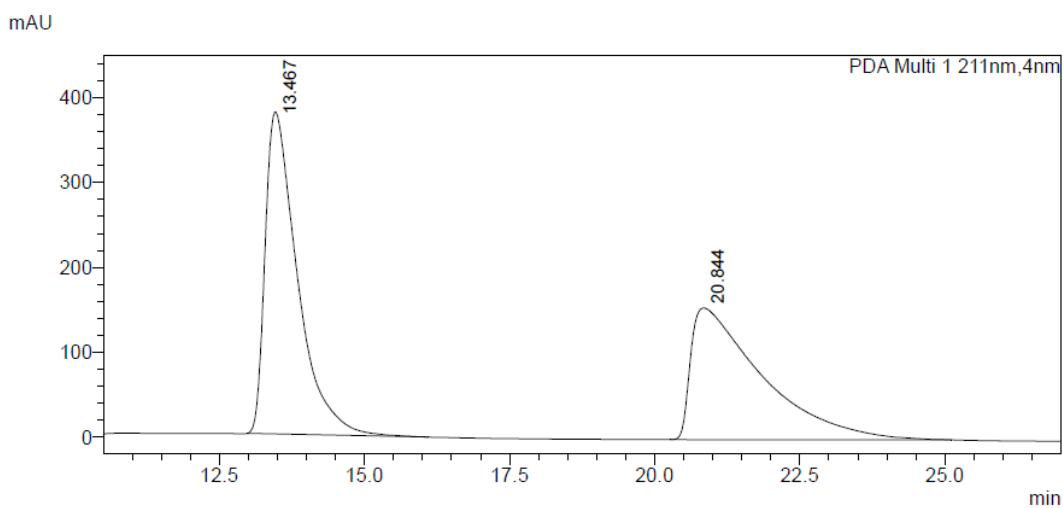

**<Peak Table>**

| PDA Ch1 211nm |           |         |
|---------------|-----------|---------|
| Peak#         | Ret. Time | Area%   |
| 1             | 13.467    | 52.604  |
| 2             | 20.844    | 47.396  |
| Total         |           | 100.000 |

HPLC Data for **40<sub>maj</sub>**: Chiralcel OD-H (95:5 hexane : *i*PrOH, flow rate 1 mlmin<sup>-1</sup>, 211 nm, 40 °C) *t<sub>R</sub>* (2*R*,3*S*): 12.4 min, *t<sub>R</sub>* (2*S*,3*R*): 19.0 min, 71:29 er.

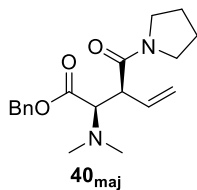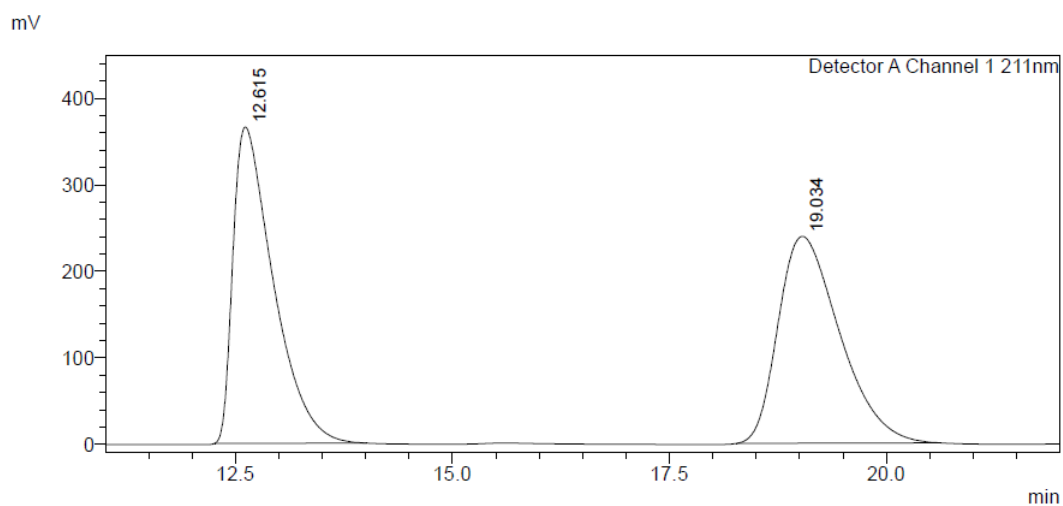

#### <Peak Table>

| Detector A Channel 1 211nm |           |         |
|----------------------------|-----------|---------|
| Peak#                      | Ret. Time | Area%   |
| 1                          | 12.615    | 50.043  |
| 2                          | 19.034    | 49.957  |
| Total                      |           | 100.000 |

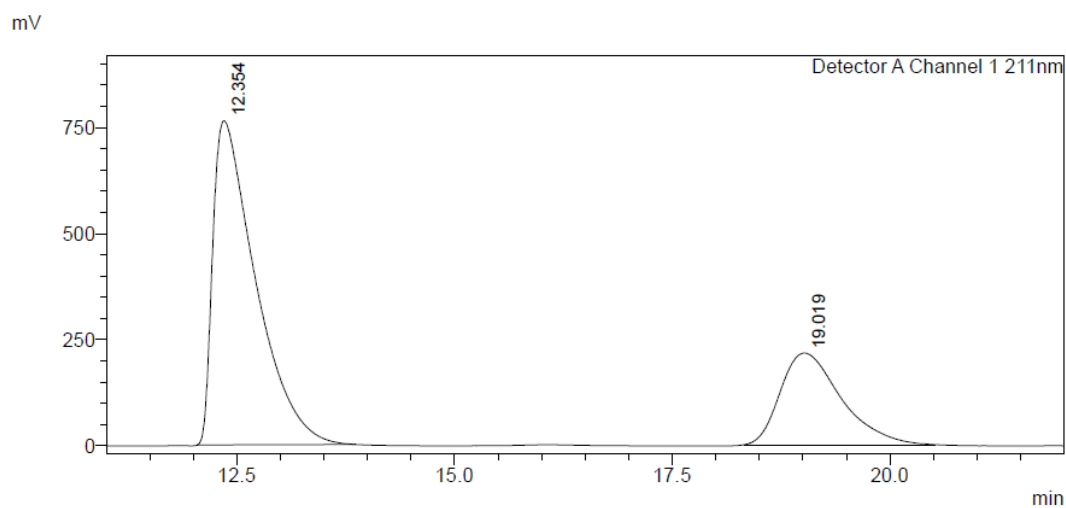

#### <Peak Table>

| Detector A Channel 1 211nm |           |         |
|----------------------------|-----------|---------|
| Peak#                      | Ret. Time | Area%   |
| 1                          | 12.354    | 71.418  |
| 2                          | 19.019    | 28.582  |
| Total                      |           | 100.000 |



HPLC Data for **40<sub>min</sub>**: Chiralcel OD-H (95:5 hexane : *i*PrOH, flow rate 1 mlmin<sup>-1</sup>, 211 nm, 40 °C) *t<sub>R</sub>* (2*S*,3*S*): 7.9 min, *t<sub>R</sub>* (2*R*,3*R*): 8.8 min, 66:34 er.

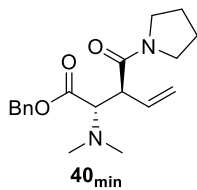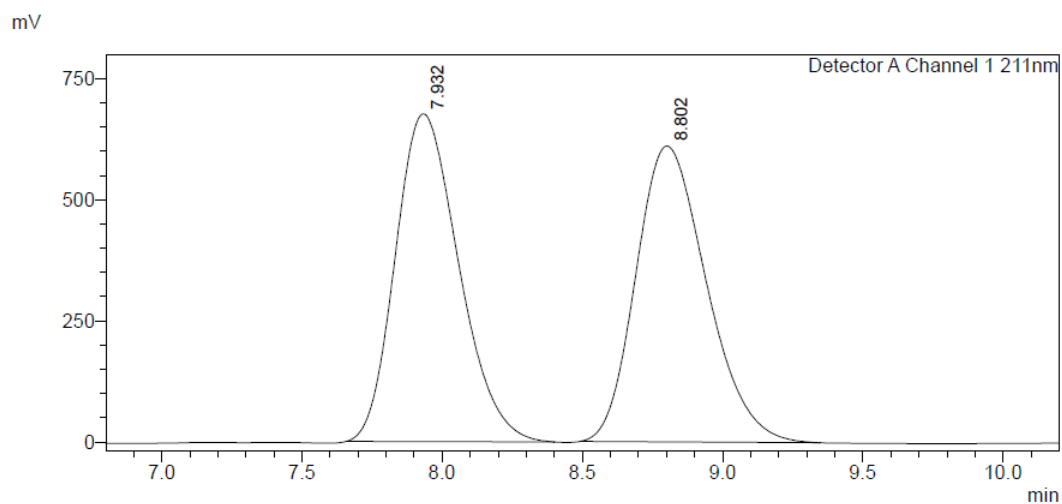

**<Peak Table>**

| Detector A Channel 1 211nm |           |         |
|----------------------------|-----------|---------|
| Peak#                      | Ret. Time | Area%   |
| 1                          | 7.932     | 49.916  |
| 2                          | 8.802     | 50.084  |
| Total                      |           | 100.000 |

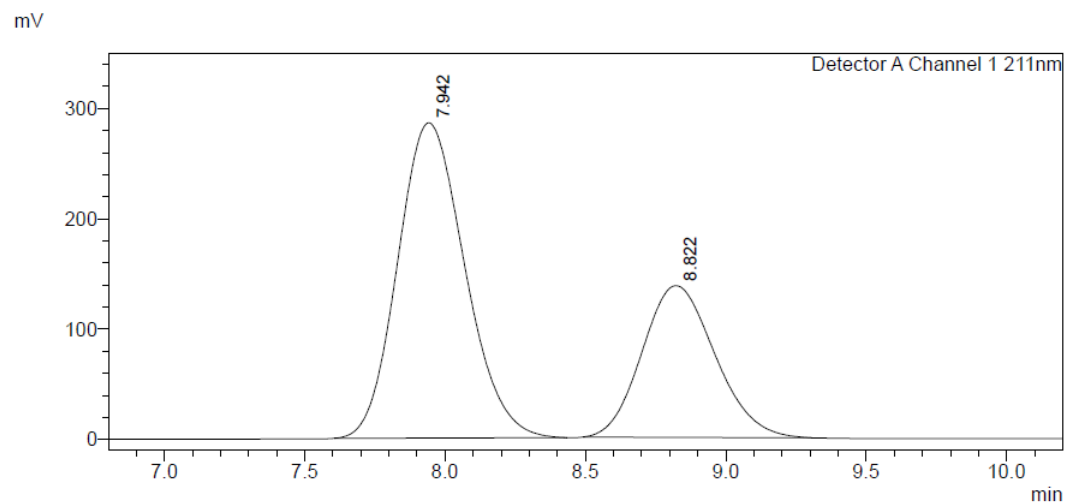

**<Peak Table>**

| Detector A Channel 1 211nm |           |         |
|----------------------------|-----------|---------|
| Peak#                      | Ret. Time | Area%   |
| 1                          | 7.942     | 65.649  |
| 2                          | 8.822     | 34.351  |
| Total                      |           | 100.000 |

HPLC Data for **41<sub>maj</sub>**: Chiralcel OD-H (95:5 hexane : *i*PrOH, flow rate 1 mlmin<sup>-1</sup>, 211 nm, 40 °C) *t<sub>R</sub>* (2*R*,3*S*): 15.4 min, *t<sub>R</sub>* (2*S*,3*R*): 18.7 min, 75:25 er.

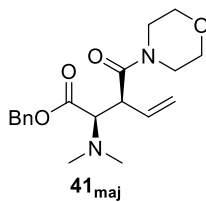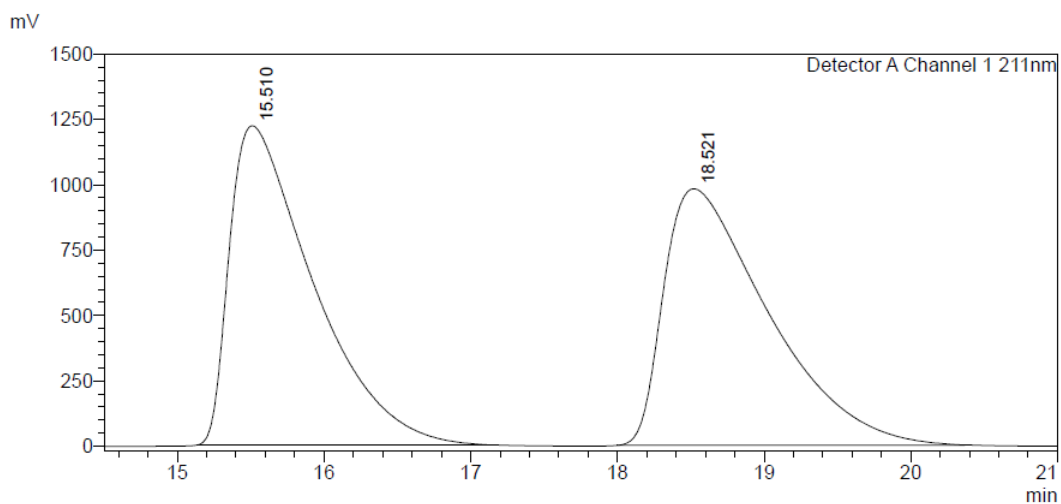

**<Peak Table>**

| Detector A Channel 1 211nm |           |         |
|----------------------------|-----------|---------|
| Peak#                      | Ret. Time | Area%   |
| 1                          | 15.510    | 49.957  |
| 2                          | 18.521    | 50.043  |
| Total                      |           | 100.000 |

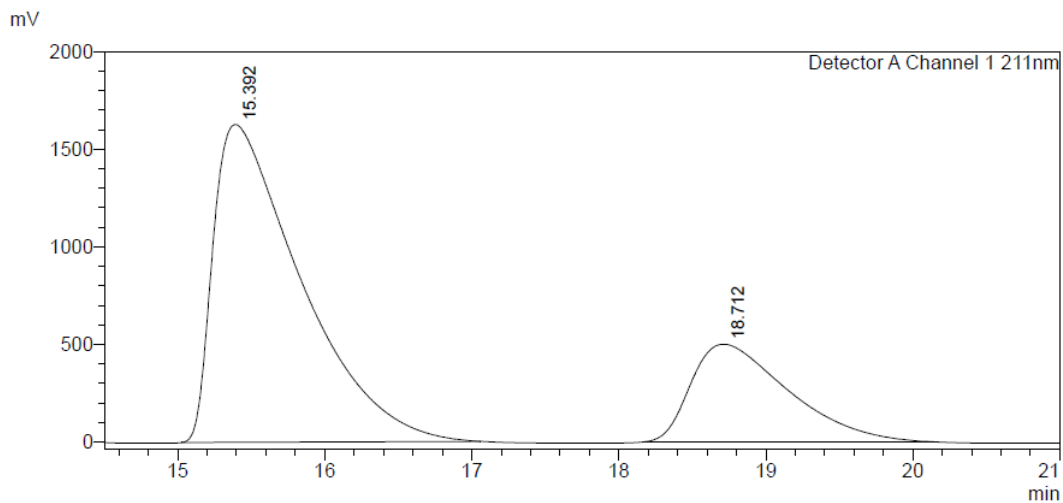

**<Peak Table>**

| Detector A Channel 1 211nm |           |         |
|----------------------------|-----------|---------|
| Peak#                      | Ret. Time | Area%   |
| 1                          | 15.392    | 74.669  |
| 2                          | 18.712    | 25.331  |
| Total                      |           | 100.000 |

HPLC Data for **41<sub>min</sub>**: Chiralcel OD-H (97:3 hexane : *i*PrOH, flow rate 1 mlmin<sup>-1</sup>, 211 nm, 40 °C) *t<sub>R</sub>* (2*S*,3*S*): 14.0 min, *t<sub>R</sub>* (2*R*,3*R*): 15.9 min, 44:56 er.

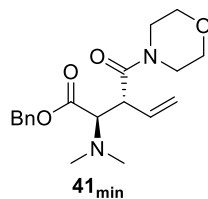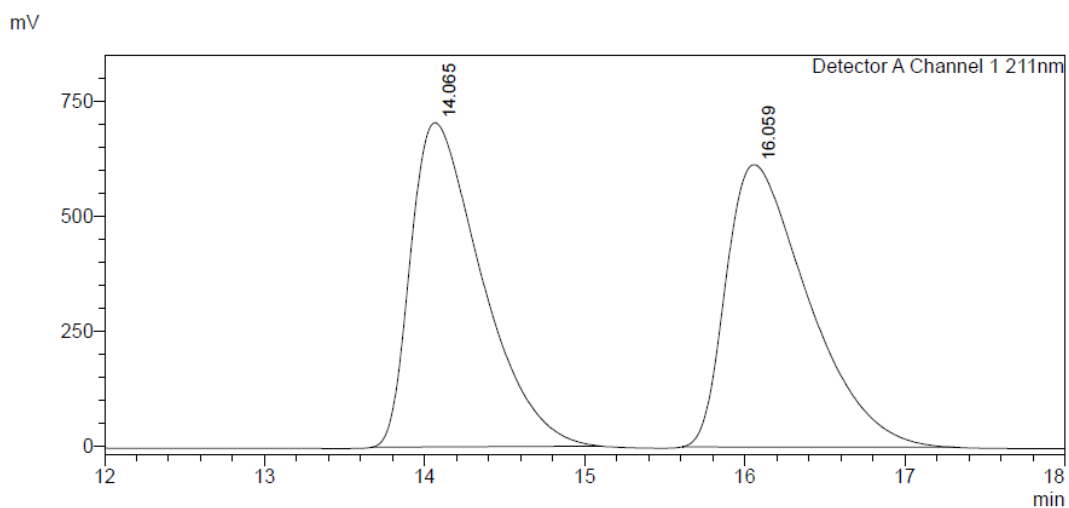

**<Peak Table>**

| Detector A Channel 1 211nm |           |         |
|----------------------------|-----------|---------|
| Peak#                      | Ret. Time | Area%   |
| 1                          | 14.065    | 49.803  |
| 2                          | 16.059    | 50.197  |
| Total                      |           | 100.000 |

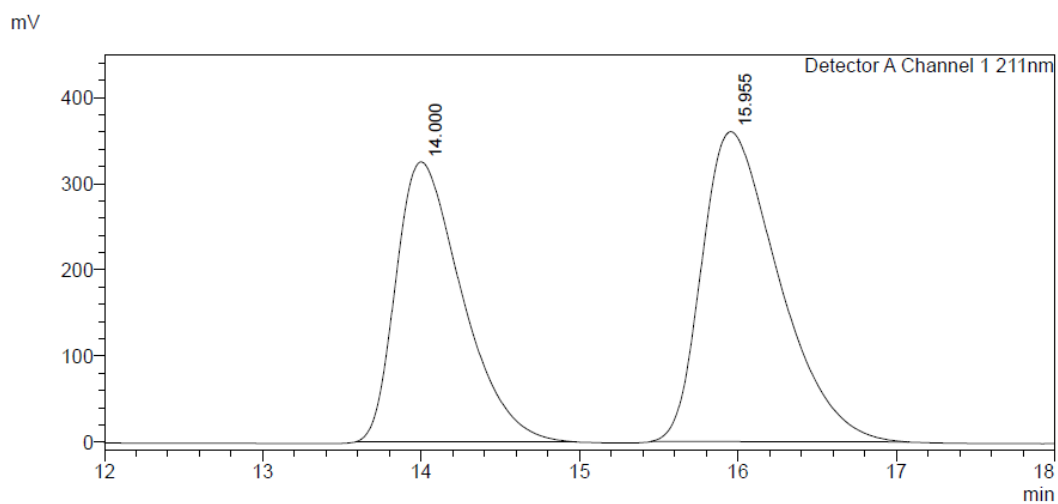

**<Peak Table>**

| Detector A Channel 1 211nm |           |         |
|----------------------------|-----------|---------|
| Peak#                      | Ret. Time | Area%   |
| 1                          | 14.000    | 43.667  |
| 2                          | 15.955    | 56.333  |
| Total                      |           | 100.000 |
